# Supplementary material for: Comparison of Metabolites and Main Nutritional Components between Uncooked and Cooked Purple Rice
Source: MDPI journal article supplement (doi:10.3390/metabo13091018), 2023-09-15
Supplement: s1 [file s1]

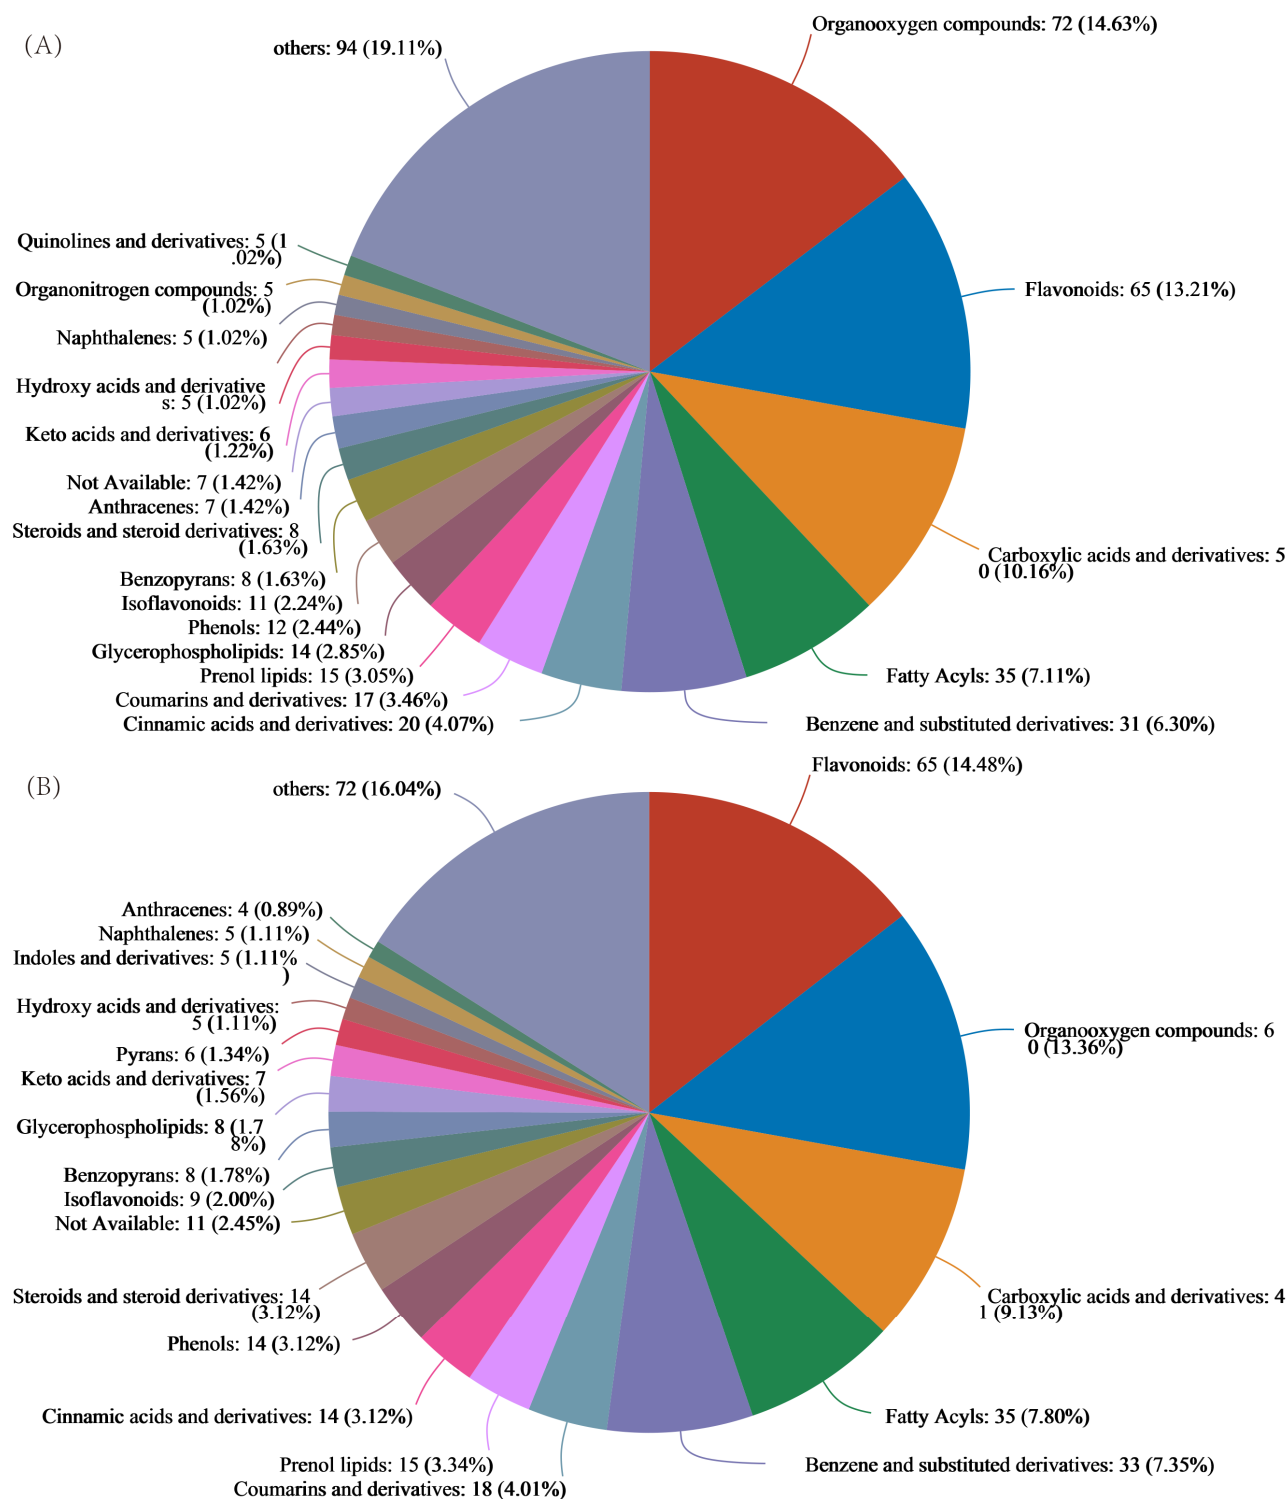

**Figure S3.** Statistical map of compounds. The name and percentage of the metabolites in the selected HMDB hierarchy (Class) are displayed in a high to low order, depending on the number of metabolites. The different colours in each pie plot in the figure represent a different HMDB classification, the area of which represents the relative proportion of the metabolites in that classification. (A) YZ6C vs YZ6U, (B) YZN1C vs YZN1U.
