# Supplementary material for: Comparison of Metabolites and Main Nutritional Components between Uncooked and Cooked Purple Rice
Source: MDPI journal article supplement (doi:10.3390/metabo13091018), 2023-09-15
Supplement: s1 [file s1]

**Table S1.** The linear equations for the flavonoids and phenolic compounds.

| Metabolites             | Retention time | limit of detection | limit of quantitation | Standard curves                                                       | RSD (%) |
|-------------------------|----------------|--------------------|-----------------------|-----------------------------------------------------------------------|---------|
| 4-Hydroxyproline        | 4.42           | 28.65              | 28.65                 | $y = 1387.24124 x + 19492.53618$ ( $r = 0.99891$ , $r^2 = 0.99781$ )  | 5.93    |
| beta-Alanine            | 3.59           | 40.65              | 40.65                 | $y = 154.99409 x + 2159.95738$ ( $r = 0.99895$ , $r^2 = 0.99791$ )    | 10.09   |
| gamma-Aminobutyric acid | 2.59           | 47.48              | 236.23                | $y = 1284.10741 x + 1.64968e5$ ( $r = 0.99534$ , $r^2 = 0.99071$ )    | 7.73    |
| L-Alanine               | 4.31           | 59.29              | 59.29                 | $y = 91.37700 x + 3853.61512$ ( $r = 0.99970$ , $r^2 = 0.99941$ )     | 12.32   |
| L-Arginine              | 9.77           | 210.57             | 210.57                | $y = 671.72717 x + 1.07202e5$ ( $r = 0.99412$ , $r^2 = 0.98828$ )     | 4.44    |
| L-Asparagine            | 6.47           | 92.69              | 113.09                | $y = 65.65557 x + -4026.71185$ ( $r = 0.99915$ , $r^2 = 0.99829$ )    | 9.68    |
| L-Aspartic acid         | 8.14           | 852.21             | 1107.14               | $y = 717.14176 x + -5.95497e5$ ( $r = 0.99884$ , $r^2 = 0.99769$ )    | 7.92    |
| L-Glutamic acid         | 6.1            | 24.16              | 142.26                | $y = 86.70728 x + 1136.28475$ ( $r = 0.99971$ , $r^2 = 0.99942$ )     | 6.94    |
| L-Glutamine             | 6.08           | 949.57             | 2293.01               | $y = 1229.07338 x + -1.12828e6$ ( $r = 0.99714$ , $r^2 = 0.99428$ )   | 13.21   |
| L-Glycine               | 5.18           | 569.93             | 569.93                | $y = 5.01053 x + -1425.62346$ ( $r = 0.99883$ , $r^2 = 0.99766$ )     | 7.99    |
| L-Histidine             | 9.49           | 32.69              | 32.69                 | $y = 834.62443 x + -726.29643$ ( $r = 0.99965$ , $r^2 = 0.99929$ )    | 10.00   |
| L-Isoleucine            | 2.43           | 8.61               | 942.49                | $y = 1624.94987 x + 3.51899e4$ ( $r = 0.99675$ , $r^2 = 0.99351$ )    | 8.99    |
| L-Leucine               | 2.21           | 127.70             | 277.79                | $y = 33.37250 x + -2505.92657$ ( $r = 0.99876$ , $r^2 = 0.99752$ )    | 10.00   |
| L-Lysine                | 10.08          | 1332.43            | 2308.00               | $y = 467.30294 x + -6.15385e5$ ( $r = 0.99917$ , $r^2 = 0.99835$ )    | 11.12   |
| L-Methionine            | 2.65           | 29.40              | 29.40                 | $y = 384.48336 x + 2477.42204$ ( $r = 0.99927$ , $r^2 = 0.99854$ )    | 2.05    |
| L-Ornithine             | 10.16          | 36.82              | 36.82                 | $y = 266.97790 x + -1431.05877$ ( $r = 0.99803$ , $r^2 = 0.99606$ )   | 10.83   |
| L-Phenylalanine         | 2.16           | 44.21              | 72.46                 | $y = 2950.84594 x + -5.00651e4$ ( $r = 0.99857$ , $r^2 = 0.99714$ )   | 11.23   |
| L-Proline               | 3.11           | 26.92              | 26.92                 | $y = 14549.47721 x + 20496.44559$ ( $r = 0.99887$ , $r^2 = 0.99774$ ) | 15.81   |
| L-Serine                | 6.2            | 4.31               | 4.31                  | $y = 137.68201 x + 4149.38611$ ( $r = 0.99842$ , $r^2 = 0.99685$ )    | 12.10   |
| L-Threonine             | 4.85           | 48.74              | 73.69                 | $y = 307.07632 x + -5473.33944$ ( $r = 0.99930$ , $r^2 = 0.99859$ )   | 3.04    |
| L-Tryptophan            | 2.13           | 153.21             | 539.68                | $y = 3727.27793 x + -4.72987e5$ ( $r = 0.99930$ , $r^2 = 0.99859$ )   | 9.82    |

|            |      |        |        |                                                                  |       |
|------------|------|--------|--------|------------------------------------------------------------------|-------|
|            |      |        |        | = 0.99728, $r^2 = 0.99456$ )                                     |       |
| L-Tyrosine | 2.99 | 5.17   | 415.03 | y = 409.62858 x + 28203.17163 (r<br>= 0.99817, $r^2 = 0.99635$ ) | 11.98 |
| L-Valine   | 2.9  | 142.71 | 142.71 | y = 2206.36574 x + -5.56010e4 (r<br>= 0.99934, $r^2 = 0.99868$ ) | 8.22  |
| Taurine    | 3.31 | 25.12  | 25.12  | y = 2922.15735 x + 3469.61469 (r<br>= 0.99735, $r^2 = 0.99470$ ) | 7.29  |

---
