# Supplementary material for: Comparison of Metabolites and Main Nutritional Components between Uncooked and Cooked Purple Rice
Source: MDPI journal article supplement (doi:10.3390/metabo13091018), 2023-09-15
Supplement: s1 [file s1]

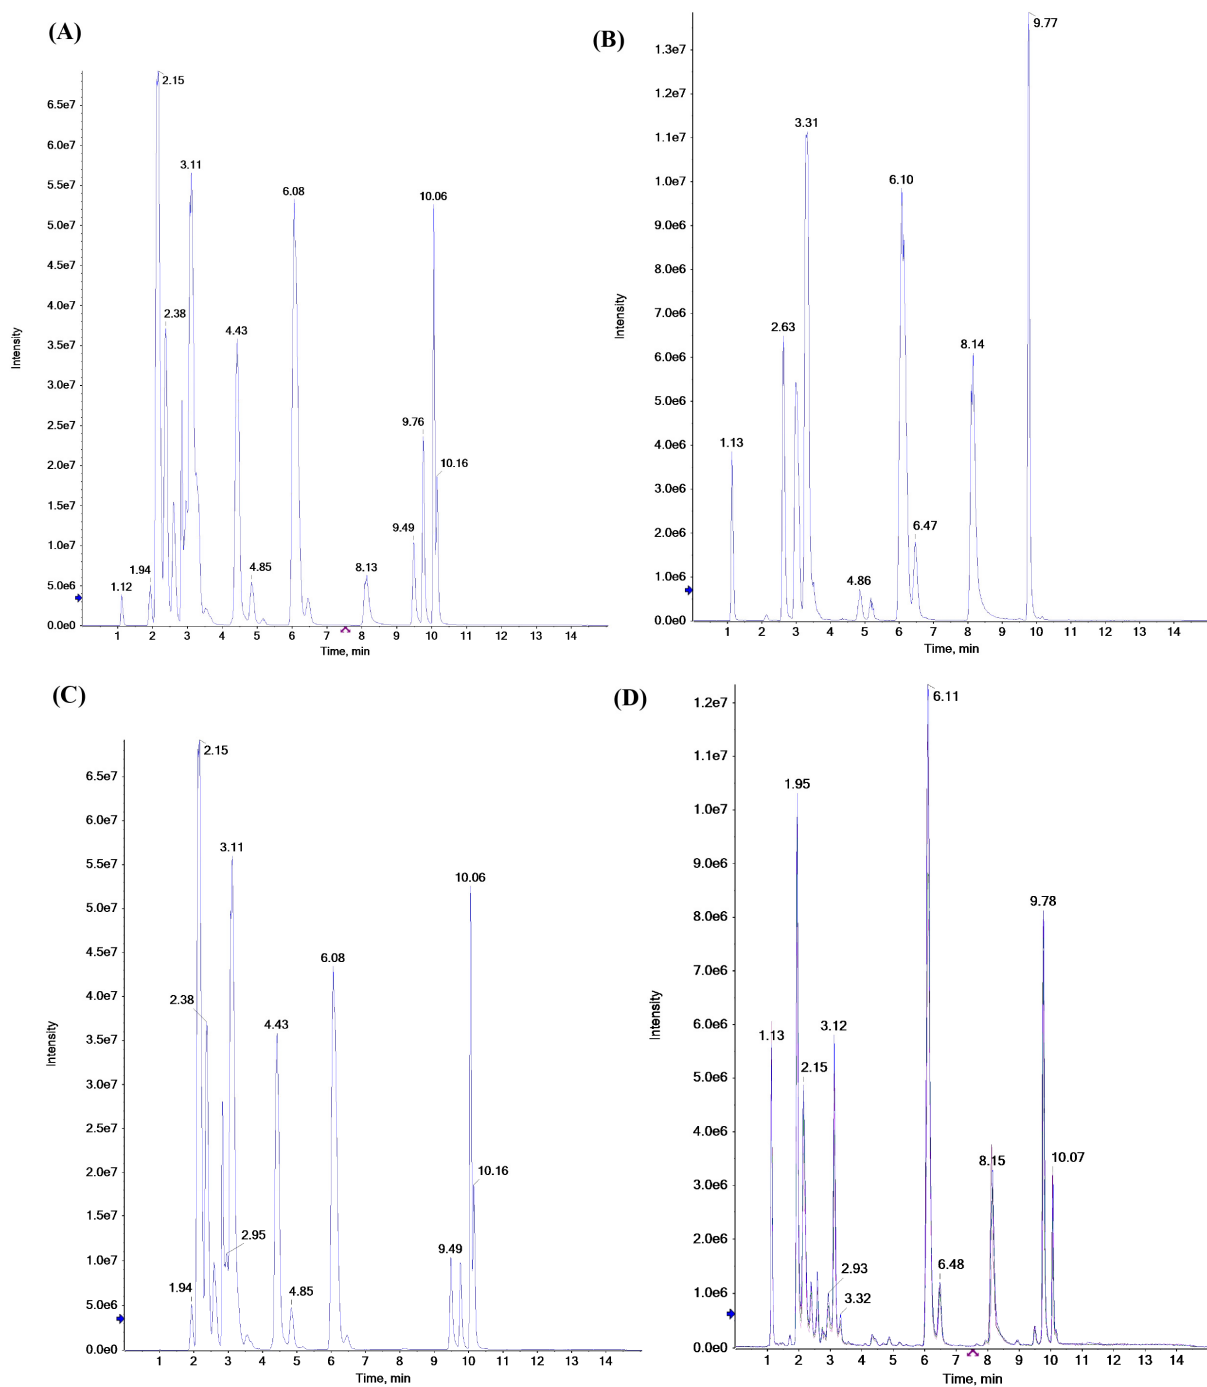

**Figure S2.** Ions current diagram. (A) Total ion current diagram (standard), (B) Extraction of negative ion current, (C) Extraction of positive ion current diagram, (D) Total ion current diagram (QC sample superposition).
