# Supplementary material for: Comparison of Metabolites and Main Nutritional Components between Uncooked and Cooked Purple Rice
Source: Metabolites. 2023 Sep 15;13(9):1018. doi: 10.3390/metabo13091018 (PMC10536460; doi:10.3390/metabo13091018)
Supplement: Supplementary file 1 [file metabolites-13-01018-s001.zip]

Archive with 6 entries (6 files):
- Figure S1.pdf
- Figure S2.pdf
- Figure S3.pdf
- Table S1.pdf
- Table S2.xls
- Table S3.xls
