# Supplementary material for: Comparison of Metabolites and Main Nutritional Components between Uncooked and Cooked Purple Rice
Source: Metabolites. 2023 Sep 15;13(9):1018. doi: 10.3390/metabo13091018 (PMC10536460; doi:10.3390/metabo13091018)
Supplement: Supplementary file 1 [file metabolites-13-01018-s001.zip › Table S2.xls]

## Sheet: Table S2
Table S2. Summary chart comparing metabolite details for YZ6C and YZ6U
ID	Metabolite	Metab ID	level	KEGG Pathway ID	KEGG Pathway Description	KEGG Compound ID	Library ID	Mode	KEGG Compound First Category	KEGG Compound Second Category	KEGG Pathway First Category	KEGG Pathway Second Category	HMDB Superclass	HMDB Class	M/Z	Adducts	Formula	Retention time	RSD	Fragmentation Score	Theoretical Fragmentation Score	Mass Error	CAS ID	HMDB Subclass	YZN1U_1	YZN1U_2	YZN1U_3	YZN1C_1	YZN1C_2	YZN1C_3	YZ6U_1	YZ6U_2	YZ6U_3	YZ6C_1	YZ6C_2	YZ6C_3	QC01	QC02	QC03
pos_1000	6''-O-Malonylwistin	metab_3	-	-	-	-	HMDB0039083	pos	-	-	-	-	Lipids and lipid-like molecules	Steroids and steroid derivatives	511.123	M+H-2H2O	C26H26O13	4.8141	0.022546	0	35.2	-1.47066	163310-44-9	Physalins and derivatives	5.0951	5.0489	5.1419	4.5774	4.7179	4.4329	5.0606	4.9979	5.1772	4.3451	4.5552	4.3204	4.9277	4.9301	4.912
pos_1002	Peonidin 3-(6''-acetylglucoside)	metab_5	-	-	-	-	HMDB0301893;LMPK12010242	pos	-	-	-	-	Phenylpropanoids and polyketides	Flavonoids	505.133	M+H	C24H24O12	4.8459	0.00967148	79.1	0	-1.69019	-	Flavonoid glycosides	6.0111	5.8298	5.771	5.2704	5.2763	5.2221	5.5078	5.6541	5.673	3.7244	4.5118	3.9524	5.6121	5.6075	5.6037
pos_1006	Isovitexin	metab_8	-	map00944	Flavone and flavonol biosynthesis	C01714	LMPK12110338;HMDB0253708;MJDBOTE0000242	pos	-	-	Metabolism	Biosynthesis of other secondary metabolites	Lipids and lipid-like molecules	Fatty Acyls	433.112	M+H	C21H20O10	4.9094	0.0168155	80.7	0	-1.98302	38953-85-4	Fatty amides	5.1963	4.9087	4.992	4.6042	4.5793	4.4965	4.9866	4.962	4.9997	3.9958	4.4126	4.2681	4.9067	4.8961	4.8928
pos_1007	Trans-1,2-Dihydrobenzene-1,2-diol	metab_9	-	-	-	C04221	HMDB0001164	pos	-	-	-	-	Organic oxygen compounds	Organooxygen compounds	225.112	2M+H	C6H8O2	4.9174	0.0230641	0	42.3	-1.50829	103302-38-1	Alcohols and polyols	4.8705	4.872	4.9289	5.129	5.0616	5.0306	4.569	4.7242	4.8326	5.2088	5.2265	5.1936	4.9456	4.9272	4.9437
pos_1009	7-Ethoxycoumarin	metab_11	-	-	-	C11052	HMDB0247248	pos	-	-	-	-	Phenylpropanoids and polyketides	Coumarins and derivatives	223.096	M+CH3OH+H	C11H10O3	4.9653	0.124199	0	40.3	-1.97775	31005-02-4	Not Available	4.0579	4.1093	4.299	4.0074	3.7764	3.994	4.2577	4.5074	4.2043	3.9878	4.0081	3.6227	4.1162	4.1161	4.0188
pos_1010	Forsythiaside	metab_13	-	-	-	C10456	HMDB0252460	pos	-	-	-	-	Phenylpropanoids and polyketides	Cinnamic acids and derivatives	669.18	M+2Na-H	C29H36O15	4.9733	0.0357918	0	70.5	5.16599	79916-77-1	Hydroxycinnamic acids and derivatives	5.3702	5.2431	5.2222	3.7391	3.8074	3.7777	4.5318	4.7012	5.075	3.7577	3.7473	3.7447	4.9149	4.8911	4.8861
pos_1024	Oenin	metab_28	-	map00942	Anthocyanin biosynthesis	C12140	LMPK12010372;HMDB0038010;HMDB0030777	pos	-	-	Metabolism	Biosynthesis of other secondary metabolites	Phenylpropanoids and polyketides	Flavonoids	493.133	M+H	C23H24O12	5.1878	0.0348497	84.1	0	-1.83766	7228-78-6;30113-37-2	Flavonoid glycosides	5.0317	5.1885	5.2166	4.9107	4.5168	4.7135	5.5357	5.5604	5.482	5.1465	5.2551	5.3258	5.2763	5.2526	5.2486
pos_1027	Acteoside	metab_31	-	-	-	C10501	HMDB0034843;HMDB0259785	pos	-	-	-	-	Lipids and lipid-like molecules	Prenol lipids	669.18	M+2Na-H	C29H36O15	5.1958	0.0415673	0	55.5	5.50125	61276-17-3	Triterpenoids	5.7866	5.865	5.8866	4.462	4.534	4.3459	5.1838	5.1132	5.3186	3.7653	3.755	3.901	5.4554	5.427	5.4225
pos_1033	4-O-p-Coumaroylquinic acid	metab_38	-	-	-	C10441	HMDB0302093	pos	-	-	-	-	Organic oxygen compounds	Organooxygen compounds	339.107	M+H	C16H18O8	5.3625	0.0212192	0	63.6	-2.24718	-	Alcohols and polyols	4.839	4.8521	4.8813	4.4383	3.4734	4.1504	5.1207	5.0627	5.0857	4.5731	4.6351	4.5088	4.8127	4.8142	4.7974
pos_1059	Quercetin 3-methyl ether	metab_65	-	map01110;map00944	Biosynthesis of secondary metabolites;Flavone and flavonol biosynthesis	C04443	LMPK12112729	pos	-	-	Metabolism;Metabolism	Global and overview maps;Biosynthesis of other secondary metabolites	-	-	317.065	M+H	C16H12O7	5.7277	0.0582895	64.8	0	-2.5904	-	-	4.5655	4.215	4.4051	4.3285	4.1809	3.433	4.8113	4.7057	4.6685	4.0081	3.427	3.5207	4.4582	4.4406	4.4079
pos_1060	13-L-Hydroperoxylinoleic acid	metab_67	-	map01100;map00591	Metabolic pathways;Linoleic acid metabolism	C04717	HMDB0003871	pos	-	-	Metabolism;Metabolism	Global and overview maps;Lipid metabolism	Lipids and lipid-like molecules	Fatty Acyls	277.216	M+H-2H2O	C18H32O4	5.7436	0.0302671	0	45	-1.43356	33964-75-9	Lineolic acids and derivatives	3.1225	3.621	3.4966	3.8297	3.1885	3.1936	4.5675	4.379	4.6083	4.0914	3.8254	4.0164	4.0998	4.1211	4.0974
pos_1066	Taraxacoside	metab_73	-	-	-	-	HMDB0030055	pos	-	-	-	-	Organic oxygen compounds	Organooxygen compounds	381.117	M+H-H2O	C18H22O10	5.8627	0.0249627	0	65.4	-2.04552	98449-40-2	Carbohydrates and carbohydrate conjugates	3.8994	3.4247	3.4225	4.6663	4.5277	4.6115	3.4019	3.3789	3.4337	4.5552	4.7843	4.6755	4.1223	4.1379	4.1173
pos_1067	Methyl 3,4-dicaffeoylquinate	metab_74	-	-	-	-	HMDB0037093	pos	-	-	-	-	Organic oxygen compounds	Organooxygen compounds	545.164	M+H	C27H28O12	5.8707	0.0730859	0	64.5	-2.25417	345642-66-2	Alcohols and polyols	4.433	4.5473	4.3366	3.7447	3.7538	3.7589	4.9778	4.9945	4.9536	4.0163	3.9761	4.4256	4.5277	4.5799	4.5244
pos_1087	Epitheaflavic acid 3'-gallate	metab_95	-	-	-	-	HMDB0040610	pos	-	-	-	-	Phenylpropanoids and polyketides	Flavonoids	603.075	M+Na	C28H20O14	6.0597	0.0287496	0	70.5	1.37938	34218-97-8	Flavans	5.0739	5.3495	4.6329	4.0018	4.0109	4.016	4.8612	5.2215	4.9964	4.0204	4.01	4.0073	4.511	4.5304	4.5073
pos_11	Phlorizine	metab_109	-	map00941;map01110	Flavonoid biosynthesis;Biosynthesis of secondary metabolites	C01604	HMDB0036634;HMDB0256451	pos	-	-	Metabolism;Metabolism	Biosynthesis of other secondary metabolites;Global and overview maps	Phenylpropanoids and polyketides	Flavonoids	437.143	M+H, M+Na, M+H-H2O, M+H-2H2O	C21H24O10	5.1958	0.0215664	0	65.5	-1.9161	60-81-1	Flavonoid glycosides	5.8675	5.6995	5.8834	5.5048	5.3814	5.2711	4.4269	4.9751	4.7349	3.6579	4.1351	3.7221	5.4333	5.435	5.4179
pos_1105	Stearidonic acid	metab_116	-	map00592;map01110	alpha-Linolenic acid metabolism;Biosynthesis of secondary metabolites	C16300	LMFA01030357;PW_C002804;HMDB0006547	pos	-	-	Metabolism;Metabolism	Lipid metabolism;Global and overview maps	Lipids and lipid-like molecules	Fatty Acyls	259.205	M+H-H2O	C18H28O2	6.1627	0.0209907	0	69.7	-1.71285	20290-75-9	Lineolic acids and derivatives	4.8119	4.756	5.0053	4.428	4.5508	4.5012	4.2203	4.3464	4.3846	4.1381	3.7884	3.8263	4.6322	4.619	4.6149
pos_1114	Traumatic acid	metab_126	-	map00592;map01110	alpha-Linolenic acid metabolism;Biosynthesis of secondary metabolites	C16308	LMFA01170002;HMDB0000933	pos	-	-	Metabolism;Metabolism	Lipid metabolism;Global and overview maps	Lipids and lipid-like molecules	Fatty Acyls	211.132	M+H-H2O	C12H20O4	6.186	0.0276584	0	56.7	-1.66906	6402-36-4	Fatty acids and conjugates	4.9464	4.7878	5.1404	4.3072	4.3424	4.3634	4.1428	4.4316	4.2158	3.8119	3.421	3.4183	4.6084	4.621	4.597
pos_1141	(+/-)-Hydroxycitronellol	metab_154	-	-	-	-	HMDB0030083	pos	-	-	-	-	Lipids and lipid-like molecules	Fatty Acyls	390.357	2M+ACN+H	C10H22O2	6.2653	0.0386755	0	48.3	-2.28556	-	Fatty alcohols	5.0775	5.2848	5.0937	5.2042	4.9753	4.9396	5.516	5.3028	5.3342	5.0175	4.7316	4.6695	5.1723	5.1457	5.1418
pos_1154	(15S)-Prostaglandin A2	metab_168	-	map00590;map01100	Arachidonic acid metabolism;Metabolic pathways	C05953	HMDB0002752;HMDB0242292	pos	Lipids	Eicosanoids	Metabolism;Metabolism	Lipid metabolism;Global and overview maps	Lipids and lipid-like molecules	Fatty Acyls	357.203	M+Na	C20H30O4	6.3126	0.00555834	0	38.4	-2.93916	13345-50-1	Eicosanoids	5.4039	5.5994	5.5201	4.225	3.7212	3.978	5.4826	5.223	6.0919	4.7252	4.3424	4.5069	5.5051	5.5067	5.5099
pos_1188	N-Acetylsphinganine	metab_201	-	-	-	-	HMDB0249513	pos	-	-	-	-	Lipids and lipid-like molecules	Sphingolipids	344.315	M+H	C20H41NO3	6.4081	0.00465237	0	64.1	-1.84067	-	Ceramides	5.4731	5.6706	5.6873	5.0313	5.1392	5.378	5.7735	5.6673	5.7646	5.2244	5.2156	5.3694	5.5165	5.5155	5.5194
pos_1232	DHAP(18:0)	metab_248	-	-	-	C03805	HMDB0011133;PW_C006772	pos	-	-	-	-	Organic oxygen compounds	Organooxygen compounds	500.274	M+ACN+Na	C21H41O7P	6.5668	0.00436569	0	47.1	-1.78901	-	Carbonyl compounds	6.2418	6.2023	6.1417	6.0212	6.0637	6.1126	6.1598	6.0129	6.0178	5.6941	5.7854	5.8623	6.1147	6.1163	6.1184
pos_1237	Pregnenolone	metab_253	-	map01100	Metabolic pathways	C01953	HMDB0244633;HMDB0000253;LMST02030088;PW_C000173;MJDBOTE0000783	pos	Steroids;Hormones and transmitters	21-Carbon atoms;Steroid hormones	Metabolism	Global and overview maps	Lipids and lipid-like molecules	Steroids and steroid derivatives	349.273	M+CH3OH+H	C21H32O2	6.5826	0.0116932	0	48.9	-2.0525	145-13-1	Pregnane steroids	5.5475	5.7911	5.8298	5.3096	5.2749	5.1048	4.2725	4.4297	4.08	4.0503	3.7584	3.7557	5.3563	5.358	5.3484
pos_1250	PI(16:1(9Z)/18:1(9Z))	metab_267	-	-	-	C00626	HMDB0009801;LMGP06010873	pos	-	-	-	-	Lipids and lipid-like molecules	Glycerophospholipids	857.513	M+Na	C43H79O13P	6.6383	0.0850037	0	97.3	-2.14091	-	Glycerophosphoinositols	5.6962	5.7449	5.8421	6.1908	6.3751	6.2728	5.722	5.9435	5.8026	6.2547	6.1701	6.149	6.0788	6.0808	6.0142
pos_1255	N-arachidonylethanolamine	metab_272	-	-	-	C11695	HMDB0004080;HMDB0255084	pos	-	-	-	-	Organic nitrogen compounds	Organonitrogen compounds	351.336	M+NH4	C22H39NO	6.6542	0.0367878	0	40.1	-1.98098	94421-68-8	Amines	4.7275	4.7761	4.7739	4.7845	4.7936	4.7987	5.7972	5.6385	5.1446	4.8031	4.7927	4.7901	4.9892	4.9605	4.9876
pos_1256	12-Hydroxydodecanoic acid	metab_273	-	-	-	C08317	HMDB0304547;HMDB0002059	pos	-	-	-	-	Organic acids and derivatives	Hydroxy acids and derivatives	474.378	2M+ACN+H	C12H24O3	6.6542	0.00353634	0	67.6	-1.46002	505-95-3	Medium-chain hydroxy acids and derivatives	5.3823	5.6646	5.5182	5.3688	5.1861	5.33	5.7744	5.8693	5.7329	5.56	5.5649	5.3495	5.5638	5.5667	5.5643
pos_1272	Cis-Quinceoxepane	metab_290	-	-	-	-	HMDB0038108	pos	-	-	-	-	Organoheterocyclic compounds	Oxepanes	198.185	M+NH4	C12H20O	6.7257	0.0213173	0	69.7	-1.39286	133005-51-3	Not Available	5.1145	5.1668	5.3154	5.5612	5.3997	5.4984	5.1437	5.1855	5.26	5.454	5.5077	5.5394	5.3081	5.3257	5.322
pos_1278	Contignasterol	metab_296	-	-	-	C19902	HMDB0250439	pos	-	-	-	-	Lipids and lipid-like molecules	Prenol lipids	1017.69	2M+H	C29H48O7	6.7337	0.0643749	0	37.4	-1.51219	137571-30-3	Triterpenoids	6.2124	6.3057	6.0495	5.9923	5.642	5.9225	6.7199	6.6714	6.6626	6.213	6.4383	6.2512	6.3561	6.4017	6.3523
pos_1303	Palmitoyl Ethanolamide	metab_323	-	-	-	C16512	HMDB0002100;LMFA08040057;LMFA08040013	pos	-	-	-	-	Organic acids and derivatives	Carboximidic acids and derivatives	300.289	M+H	C18H37NO2	6.7893	0.00495342	76.9	0	-2.19142	544-31-0	Carboximidic acids	6.1064	5.9259	6.2998	5.7899	5.8843	6.0459	5.8171	5.8302	5.6641	5.4566	5.2349	5.4463	5.908	5.9117	5.9078
pos_1334	PC(15:0/0:0)	metab_351	-	map00564	Glycerophospholipid metabolism	C04230	HMDB0010381;LMGP01050016;HMDB0010375	pos	Lipids	Phospholipids	Metabolism	Lipid metabolism	Lipids and lipid-like molecules	Glycerophospholipids	482.323	M+H	C23H48NO7P	6.8604	0.0222908	35.9	0	-1.30197	-	Glycerophosphocholines	5.1613	5.1185	4.3357	4.4786	4.2796	4.2847	5.5093	5.5696	5.5811	4.476	4.2787	4.3835	5.3089	5.2982	5.3175
pos_1357	15-deoxy-delta-12,14-PGJ2	metab_373	-	map00590	Arachidonic acid metabolism	C14717	LMFA03010021;HMDB0005079	pos	-	-	Metabolism	Lipid metabolism	Lipids and lipid-like molecules	Fatty Acyls	317.208	M+H	C20H28O3	6.9397	0.00935511	61.6	0	-9.16794	87893-55-8	Eicosanoids	6.6589	6.3239	6.5458	5.9825	5.9536	6.1117	6.0245	5.9342	6.1489	5.8364	5.5299	5.7774	6.2914	6.2995	6.2958
pos_1387	LysoPC(20:1(11Z)/0:0)	metab_403	-	map00564	Glycerophospholipid metabolism	C04230	HMDB0010391	pos	Lipids	Phospholipids	Metabolism	Lipid metabolism	Lipids and lipid-like molecules	Glycerophospholipids	550.385	M+H	C28H56NO7P	7.0188	0.00901528	0	46.5	-2.77689	-	Glycerophosphocholines	5.3852	5.2895	5.1236	4.5669	4.2265	4.557	5.5255	5.2985	5.4205	4.4653	4.6447	5.0458	5.3489	5.3568	5.3529
pos_14	D-Glucaro-1,4-lactone	metab_417	-	-	-	C21095	HMDB0041862	pos	-	-	-	-	Organoheterocyclic compounds	Lactones	210.06	M+H-2H2O, M+Na, M+NH4, M+H	C6H8O7	1.4518	0.0038157	0	42.1	-1.72983	5027-63-4	Gamma butyrolactones	6.2114	6.3877	6.3199	6.8075	6.8102	6.7669	6.1325	6.0939	5.7745	6.6629	6.5888	6.6988	6.4161	6.4148	6.4181
pos_1409	Arctiol	metab_424	-	-	-	-	HMDB0301955	pos	-	-	-	-	Lipids and lipid-like molecules	Prenol lipids	254.247	M+NH4	C16H28O	7.1219	0.0028684	0	66.8	-2.05614	-	Sesquiterpenoids	5.7333	5.7198	5.8408	6.0502	5.9645	5.9687	5.7133	5.6943	5.7803	5.9346	6.0148	6.0644	5.8518	5.8515	5.8495
pos_1416	PA(20:1(11Z)/22:6(4Z,7Z,10Z,13Z,16Z,19Z))	metab_430	-	map01100;map00564;map01110;map00561;map04070	Metabolic pathways;Glycerophospholipid metabolism;Biosynthesis of secondary metabolites;Glycerolipid metabolism;Phosphatidylinositol signaling system	C00416	LMGP10010555;PW_C062534;HMDB0115115	pos	Lipids	Phospholipids	Metabolism;Metabolism;Metabolism;Metabolism;Environmental Information Processing	Global and overview maps;Lipid metabolism;Global and overview maps;Lipid metabolism;Signal transduction	Lipids and lipid-like molecules	Glycerophospholipids	797.516	M+Na	C45H75O8P	7.1376	0.0524672	0	83.2	8.52538	-	Glycerophosphates	6.2114	5.7854	5.9054	5.3943	5.2139	5.6479	5.8927	5.5156	5.5163	4.3411	4.8588	5.1248	5.9142	5.9536	5.9151
pos_1423	DG(16:0/20:5(6E,8Z,11Z,14Z,17Z)-OH(5)/0:0)	metab_438	-	-	-	-	HMDB0295531	pos	-	-	-	-	Not Available	Not Available	653.473	M+Na	C39H66O6	7.1774	0.0686805	0	67.1	-3.242	-	Not Available	5.9922	5.7511	5.6605	4.4265	5.0881	5.5615	5.6405	5.3576	5.2409	4.2956	4.761	4.7889	5.5778	5.6326	5.6283
pos_143	(R)-beta-Aminoisobutyric acid	metab_444	-	map00240;map01100;map00280	Pyrimidine metabolism;Metabolic pathways;Valine, leucine and isoleucine degradation	C01205	HMDB0002299	pos	-	-	Metabolism;Metabolism;Metabolism	Nucleotide metabolism;Global and overview maps;Amino acid metabolism	Organic acids and derivatives	Carboxylic acids and derivatives	104.071	M+H-H2O, M+H	C4H9NO2	0.8737	0.0117726	0	59.7	4.60088	2140-95-6	Amino acids, peptides, and analogues	5.6499	5.7647	6.2783	6.4605	6.323	6.3619	5.7391	5.641	5.7082	6.5486	6.6246	6.5185	6.1419	6.1434	6.1514
pos_1437	(-)-Menthone	metab_451	-	map01110;map00902	Biosynthesis of secondary metabolites;Monoterpenoid biosynthesis	C00843	LMPR0102090004;HMDB0035162	pos	-	-	Metabolism;Metabolism	Global and overview maps;Metabolism of terpenoids and polyketides	Lipids and lipid-like molecules	Prenol lipids	326.305	2M+NH4	C10H18O	7.2328	0.0226848	0	42.3	-2.24751	14073-97-3	Monoterpenoids	5.7522	5.7268	5.7543	5.3237	5.5166	5.3164	5.542	5.6271	5.4881	5.1703	4.8891	4.9341	5.5006	5.5194	5.5155
pos_1454	PA(22:6(4Z,7Z,10Z,13Z,16Z,19Z)/20:0)	metab_469	-	map01100;map00564;map01110;map00561;map04070	Metabolic pathways;Glycerophospholipid metabolism;Biosynthesis of secondary metabolites;Glycerolipid metabolism;Phosphatidylinositol signaling system	C00416	HMDB0115413;PW_C062839;LMGP10010834	pos	Lipids	Phospholipids	Metabolism;Metabolism;Metabolism;Metabolism;Environmental Information Processing	Global and overview maps;Lipid metabolism;Global and overview maps;Lipid metabolism;Signal transduction	Lipids and lipid-like molecules	Glycerophospholipids	799.531	M+Na	C45H77O8P	7.2725	0.0108813	0	43.2	8.09807	-	Glycerophosphates	5.9454	5.7525	5.3963	4.5331	4.5117	4.9596	5.8653	5.5779	5.6036	4.5212	4.5108	4.8535	5.6996	5.709	5.7052
pos_1536	Eriojaposide B	metab_546	-	-	-	C17889	HMDB0038029	pos	-	-	-	-	Lipids and lipid-like molecules	Fatty Acyls	534.295	M+NH4	C25H40O11	7.6859	0.0960112	0	59	7.43889	351412-97-0	Fatty acyl glycosides	5.2554	5.4349	5.2019	5.3098	4.5883	5.0158	5.6561	5.6231	5.6805	5.1323	5.257	5.1768	5.1817	5.2585	5.2536
pos_1723	PC(16:0/0:0)	metab_747	-	map00564	Glycerophospholipid metabolism	C04230	LMGP01050018;HMDB0010382	pos	Lipids	Phospholipids	Metabolism	Lipid metabolism	Lipids and lipid-like molecules	Glycerophospholipids	518.321	M+Na	C24H50NO7P	7.6859	0.0173606	94.6	0	-1.6217	17364-16-8	Glycerophosphocholines	6.8435	6.9094	6.7912	6.8458	6.4941	6.7551	7.1788	7.117	7.1713	6.8605	6.9319	6.897	6.8912	6.8933	6.9051
pos_1736	LysoPC(20:4(8Z,11Z,14Z,17Z)/0:0)	metab_761	-	map00564	Glycerophospholipid metabolism	C04230	HMDB0010396	pos	Lipids	Phospholipids	Metabolism	Lipid metabolism	Lipids and lipid-like molecules	Glycerophospholipids	544.336	M+H	C28H50NO7P	7.67	0.0205913	0	69.8	-6.34429	-	Glycerophosphocholines	5.9605	6.0301	5.8899	5.8818	5.695	5.7428	6.3672	6.3326	6.3579	6.0155	6.1215	5.8817	6.0375	6.0546	6.0508
pos_1769	PA(18:3(9Z,12Z,15Z)/22:0)	metab_795	-	map01100;map00564;map01110;map00561;map04070	Metabolic pathways;Glycerophospholipid metabolism;Biosynthesis of secondary metabolites;Glycerolipid metabolism;Phosphatidylinositol signaling system	C00416	PW_C062436;HMDB0115018;LMGP10010418	pos	Lipids	Phospholipids	Metabolism;Metabolism;Metabolism;Metabolism;Environmental Information Processing	Global and overview maps;Lipid metabolism;Global and overview maps;Lipid metabolism;Signal transduction	Lipids and lipid-like molecules	Glycerophospholipids	777.547	M+Na	C43H79O8P	7.5826	0.0270329	0	42.4	8.73014	-	Glycerophosphates	6.0444	6.1308	5.9203	5.5118	5.4365	5.4545	6.2812	6.1721	6.1556	5.1799	5.6016	5.8206	5.9684	5.9549	5.9784
pos_1784	DGDG(18:2/16:0)	metab_811	-	-	-	-	-	pos	-	-	-	-	-	-	939.6	M+Na	C49H88O15	7.4713	0.00944585	85.9	0	-2.05804	-	-	6.7437	6.574	6.7349	6.1582	6.7696	6.5418	6.584	6.3837	6.515	5.7572	5.9912	6.2894	6.6336	6.6256	6.6313
pos_1835	DGDG(18:2/18:2)	metab_863	-	-	-	-	-	pos	-	-	-	-	-	-	963.599	M+Na	C51H88O15	7.2805	0.0318171	80.4	0	-2.54412	-	-	6.4461	6.2942	6.1853	5.6293	5.8758	5.8222	6.351	6.0977	6.2066	5.3204	5.6707	5.8714	6.3041	6.306	6.3288
pos_1874	DG(18:3(9Z,12Z,15Z)/16:0/0:0)	metab_904	-	-	-	C00165	PW_C003352;HMDB0007301	pos	-	-	-	-	Lipids and lipid-like molecules	Fatty Acyls	613.481	M+Na	C37H66O5	7.1535	0.0138313	0	91	1.83804	-	Lineolic acids and derivatives	5.8442	5.5601	5.6936	5.0636	5.088	5.1244	5.5142	5.415	4.9138	4.1826	4.1722	4.5223	5.5053	5.5167	5.5145
pos_191	6-(4-O-beta-D-Glucosyl-3-methyl-trans-but-2-enyl-amino)-purine	metab_939	-	map01110;map00908	Biosynthesis of secondary metabolites;Zeatin biosynthesis	C03423	HMDB0302640	pos	-	-	Metabolism;Metabolism	Global and overview maps;Metabolism of terpenoids and polyketides	Lipids and lipid-like molecules	Fatty Acyls	382.17	M+H-H2O, M+H	C16H23N5O6	2.8189	0.0222246	0	56.2	-5.35317	-	Fatty acyl glycosides	4.9535	5.2157	5.0426	4.8619	4.4516	3.9939	5.5693	5.6402	5.6793	5.2982	5.1708	5.0838	5.3052	5.3069	5.2893
pos_195	Hydroxysyringaresinol	metab_980	-	-	-	-	HMDB0304582	pos	-	-	-	-	Phenylpropanoids and polyketides	Cinnamic acids and derivatives	360.132	M+NH4, M+Na	C15H18O9	2.9861	0.0372547	0	32.3	8.17679	-	Hydroxycinnamic acids and derivatives	5.0231	4.8854	4.8814	4.8488	4.8831	4.7923	4.9464	4.9463	4.8739	4.5471	4.7084	4.6635	4.8847	4.8619	4.8537
pos_200	Domesticoside	metab_1031	-	-	-	-	HMDB0029647	pos	-	-	-	-	Organic oxygen compounds	Organooxygen compounds	367.099	M+Na, M+K	C15H20O9	3.0973	0.009485	0	35.9	-2.10424	24587-97-1	Carbohydrates and carbohydrate conjugates	5.1031	5.1478	5.113	5.8914	5.9387	5.918	5.0397	5.0702	5.2403	5.6648	5.7808	5.6247	5.4397	5.4413	5.4335
pos_2008	Cetyl recinoleate	metab_1040	-	-	-	-	HMDB0249839	pos	-	-	-	-	Lipids and lipid-like molecules	Fatty Acyls	540.534	M+NH4	C34H66O3	6.813	0.0156879	0	32.5	-1.50847	-	Fatty acid esters	6.319	6.3727	6.3099	5.8358	6.0166	5.9564	6.3702	6.389	6.4317	6.0417	5.9668	6.0939	6.1386	6.1259	6.1366
pos_2014	Sclareol	metab_1046	-	map00904;map01110	Diterpenoid biosynthesis;Biosynthesis of secondary metabolites	C09183	LMPR0104030010;HMDB0036827;MJDBOTE0001479	pos	-	-	Metabolism;Metabolism	Metabolism of terpenoids and polyketides;Global and overview maps	Lipids and lipid-like molecules	Prenol lipids	326.305	M+NH4	C20H36O2	6.805	0.0116351	0	57.6	-2.33456	515-03-7	Diterpenoids	6.5001	6.4073	6.4051	6.07	6.2295	6.1174	6.3376	6.3827	6.2209	5.956	5.7336	5.8202	6.2795	6.2811	6.2889
pos_205	Homovanillic Acid	metab_1078	-	map01100;map00350	Metabolic pathways;Tyrosine metabolism	C05582	PW_C000074;HMDB0000118;MJDBSJD0000085	pos	-	-	Metabolism;Metabolism	Global and overview maps;Amino acid metabolism	Benzenoids	Phenols	183.065	M+H-H2O, M+H	C9H10O4	3.0894	0.0127435	32.3	0	-1.21119	306-08-1	Methoxyphenols	3.8229	3.6304	3.916	5.6244	5.6549	5.6602	3.9073	3.9448	3.9491	5.4013	5.5652	5.378	5.1349	5.1243	5.1326
pos_2076	D-(+)-dihydrocarvone	metab_1104	-	map01110;map00903	Biosynthesis of secondary metabolites;Limonene and pinene degradation	C11398	HMDB0302236	pos	-	-	Metabolism;Metabolism	Global and overview maps;Metabolism of terpenoids and polyketides	Lipids and lipid-like molecules	Prenol lipids	170.154	M+NH4	C10H16O	6.7257	0.023563	0	64.1	-1.47965	-	Monoterpenoids	4.863	4.8394	5.0182	5.2681	5.1751	5.1987	4.893	4.8587	4.9242	5.1237	5.2176	5.2775	5.0196	5.0401	5.0305
pos_2099	N-Isobutyloctadeca-trans-2-trans-4-dienamide	metab_1127	-	-	-	-	HMDB0302880	pos	-	-	-	-	Lipids and lipid-like molecules	Fatty Acyls	336.326	M+H	C22H41NO	6.6701	0.0162171	0	45.6	-1.45291	-	Fatty amides	4.5386	4.5734	4.4478	4.6133	4.7339	4.616	5.8976	5.6669	5.0427	4.7546	4.8982	4.6767	5.1649	5.1786	5.1748
pos_2143	Drostanolone	metab_1172	-	-	-	C14605	HMDB0014996	pos	-	-	-	-	Lipids and lipid-like molecules	Steroids and steroid derivatives	322.273	M+NH4	C20H32O2	6.5747	0.00720214	0	68.5	-2.48563	58-19-5	Androstane steroids	5.6813	5.4909	5.6872	5.3989	5.457	5.505	5.0859	5.3324	5.2144	4.9167	4.7535	4.9193	5.3753	5.3736	5.3692
pos_2166	Palmitoleamide	metab_1196	-	-	-	-	LMFA08010010;HMDB0256086	pos	-	-	-	-	Lipids and lipid-like molecules	Fatty Acyls	276.232	M+Na	C16H31NO	6.5193	0.0211092	0	43.1	7.6902	-	Fatty amides	4.8775	4.8477	5.0805	5.2451	5.1497	5.2546	4.8216	4.8805	4.943	5.0619	5.2381	5.2437	5.0494	5.0357	5.0322
pos_2175	13-Docosenamide	metab_1206	-	-	-	-	HMDB0244507	pos	-	-	-	-	Lipids and lipid-like molecules	Fatty Acyls	355.368	M+NH4	C22H43NO	6.5035	0.0223546	0	77	-1.71225	-	Fatty amides	4.3789	4.8836	3.6845	3.6952	3.7042	3.7094	6.2466	6.2286	5.5088	3.7137	4.8844	3.8028	5.5037	5.4892	5.4854
pos_220	5,6-Methylenedioxy-2-aminoindane	metab_1234	-	-	-	-	HMDB0244545	pos	-	-	-	-	Organoheterocyclic compounds	Benzodioxoles	219.112	M+H-H2O, M+ACN+H	C10H11NO2	3.5889	0.0218421	0	33.7	-1.93232	-	Not Available	3.089	5.4534	3.1353	4.2604	4.0391	4.5469	3.1148	3.0918	3.1465	3.8521	3.5446	3.7063	4.7809	4.7822	4.7651
pos_2230	Erucic acid	metab_1267	-	map01040	Biosynthesis of unsaturated fatty acids	C08316	HMDB0002068	pos	Lipids	Fatty acids	Metabolism	Lipid metabolism	Lipids and lipid-like molecules	Fatty Acyls	356.352	M+NH4	C22H42O2	6.3922	0.0469102	0	30.5	-2.13681	112-86-7	Fatty acids and conjugates	5.2946	5.5757	5.4602	5.4846	5.3161	5.366	5.697	5.5904	5.5751	5.4638	5.1269	5.33	5.4831	5.4463	5.4811
pos_2250	(S)-14-Methylhexadecanoic acid	metab_1289	-	-	-	-	HMDB0031067	pos	-	-	-	-	Lipids and lipid-like molecules	Fatty Acyls	288.289	M+NH4	C17H34O2	6.3444	0.0229982	0	38.7	-2.54166	5746-59-8	Fatty acids and conjugates	4.8356	4.97	4.8104	3.6593	3.9666	4.1954	5.3691	5.4316	5.4881	4.6062	4.348	5.1221	5.0497	5.0554	5.0359
pos_226	Dihydroisorhamnetin	metab_1298	-	-	-	-	HMDB0037501	pos	-	-	-	-	Phenylpropanoids and polyketides	Flavonoids	301.07	M+H-H2O, M+H	C16H14O7	3.9787	0.00513169	0	45.8	-2.52191	55812-91-4	O-methylated flavonoids	7.5788	7.3713	7.3822	7.0142	7.0249	7.0096	6.9643	7.1251	6.8901	6.1677	6.3411	6.199	7.2171	7.2165	7.213
pos_2277	Dodemorph	metab_1316	-	-	-	C18786	-	pos	-	-	-	-	-	-	299.305	M+NH4	C18H35NO	6.3046	0.0204153	48.7	0	-2.368	1593-77-7	-	5.1999	5.5196	4.8808	4.4962	4.5052	4.8653	5.7263	5.8016	6.232	4.7959	4.6015	5.479	5.5559	5.547	5.5648
pos_2286	Cinobufagin	metab_1326	-	-	-	C16931	HMDB0250266;LMST01130032	pos	Steroids	24-Carbon atoms	-	-	Lipids and lipid-like molecules	Steroids and steroid derivatives	460.269	M+NH4	C26H34O6	6.281	0.0352191	0	55.4	-1.74213	470-37-1	Steroid lactones	6.2594	6.19	6.0984	6.4492	6.5918	6.5714	6.4559	6.494	6.5778	6.9539	6.8439	6.8241	6.5223	6.4944	6.5199
pos_2287	Harmaline	metab_1327	-	map00901	Indole alkaloid biosynthesis	C06536	HMDB0030310;MJDBOTE0001002	pos	-	-	Metabolism	Biosynthesis of other secondary metabolites	Alkaloids and derivatives	Harmala alkaloids	446.253	2M+NH4	C13H14N2O	6.281	0.00186093	0	45.4	-4.98728	304-21-2	Not Available	6.0956	6.1267	6.0209	6.2653	6.4164	6.3628	6.0969	6.1156	6.2168	6.5132	6.4315	6.4548	6.1526	6.1542	6.1539
pos_2288	Capsiamide	metab_1328	-	-	-	C17515	HMDB0040940	pos	-	-	-	-	Organic acids and derivatives	Carboxylic acids and derivatives	302.305	M+CH3OH+H	C17H35NO	6.281	0.0090977	0	55.9	-2.29457	64317-66-4	Carboxylic acid derivatives	6.1222	6.3688	6.209	6.3322	6.1437	6.2282	6.5643	6.4051	6.3707	6.267	5.9953	6.0766	6.272	6.268	6.2641
pos_2305	9-Octadecenamide	metab_1347	-	-	-	C19670	HMDB0002117;HMDB0247607	pos	-	-	-	-	Lipids and lipid-like molecules	Fatty Acyls	304.263	M+Na	C18H35NO	6.2493	0.0626041	0	30.9	6.46252	301-02-0	Fatty amides	5.15	4.6257	5.1112	4.2149	3.8689	4.0608	4.2139	4.381	4.6834	3.8784	3.868	3.8653	4.3845	4.3893	4.433
pos_231	4-Methylcoumarin	metab_1351	-	-	-	-	HMDB0246508	pos	-	-	-	-	Phenylpropanoids and polyketides	Coumarins and derivatives	193.086	M+H, M+CH3OH+H	C10H8O2	4.3289	0.00427303	68.5	0	-1.47095	-	Not Available	4.239	4.2931	4.4992	5.3078	5.3142	5.136	3.988	4.0541	4.1558	5.2018	5.3489	5.2989	4.8262	4.8225	4.824
pos_2324	Rubschisandrin	metab_1367	-	-	-	C10621	HMDB0257360	pos	-	-	-	-	Phenylpropanoids and polyketides	Tannins	418.222	M+NH4	C23H28O6	6.2099	0.0152926	0	47.8	-2.19175	82467-51-4	Hydrolyzable tannins	5.5513	5.6058	5.6022	5.8417	5.8168	5.7229	5.4577	5.5514	5.6813	5.9211	5.832	5.8797	5.6851	5.6757	5.6724
pos_2356	N-Palmitoyl Lysine	metab_1399	-	-	-	-	HMDB0241929	pos	-	-	-	-	Organic acids and derivatives	Carboxylic acids and derivatives	349.321	M+H-2H2O	C22H44N2O3	6.1627	0.0929223	0	34.4	-1.82386	-	Amino acids, peptides, and analogues	3.1827	4.3823	3.229	3.2397	3.2487	3.2538	5.4106	5.0746	4.1904	3.2582	3.2478	3.2452	4.4402	4.4396	4.3679
pos_2369	2,6-Dimethyl-7-octene-1,6-diol 8-O-glucoside	metab_1413	-	-	-	-	HMDB0033218	pos	-	-	-	-	Lipids and lipid-like molecules	Fatty Acyls	299.182	M+H-2H2O	C16H30O7	6.1308	0.0220149	0	38.8	-9.48388	219814-33-2	Fatty acyl glycosides	4.4845	4.4329	4.3907	4.5263	4.6465	4.5227	4.369	4.3048	4.4315	4.7044	4.6882	4.5568	4.3272	4.3127	4.3093
pos_2386	2-Nonene-1,4-diol	metab_1432	-	-	-	-	HMDB0245271	pos	-	-	-	-	Lipids and lipid-like molecules	Fatty Acyls	334.294	2M+NH4	C9H18O2	6.0676	0.0509272	0	39.8	-2.79932	-	Fatty alcohols	4.6655	4.916	4.6957	4.8663	4.7	4.6923	5.1884	4.9433	5.0081	4.7559	4.5876	4.6835	4.8099	4.8179	4.7757
pos_2399	(Z)-N-Coumaroyl-5-hydroxyanthranilic acid	metab_1445	-	-	-	C08472	HMDB0038577	pos	-	-	-	-	Phenylpropanoids and polyketides	Cinnamic acids and derivatives	621.149	2M+Na	C16H13NO5	6.0047	0.0299845	0	61.1	1.83698	108605-70-5	Hydroxycinnamic acids and derivatives	5.4229	5.0015	5.1685	4.2582	4.168	4.1732	4.6626	4.4146	5.0383	4.1775	4.1672	4.1645	4.8781	4.8537	4.8744
pos_2404	Tricetin	metab_1452	-	map00941	Flavonoid biosynthesis	C10192	LMPK12110847;HMDB0029620	pos	-	-	Metabolism	Biosynthesis of other secondary metabolites	Phenylpropanoids and polyketides	Flavonoids	303.049	M+H	C15H10O7	5.9809	0.0137177	67.9	0	-2.19318	520-31-0	Flavones	5.3638	5.1492	5.142	6.0256	5.9216	5.9382	4.4306	4.7195	4.4987	5.7216	5.7838	5.7995	5.5083	5.5061	5.497
pos_2410	CDP-glucose	metab_1459	-	map01100;map00520;map00500;map01250	Metabolic pathways;Amino sugar and nucleotide sugar metabolism;Starch and sucrose metabolism;Biosynthesis of nucleotide sugars	C00501	HMDB0003369	pos	-	-	Metabolism;Metabolism;Metabolism;Metabolism	Global and overview maps;Carbohydrate metabolism;Carbohydrate metabolism;Global and overview maps	Nucleosides, nucleotides, and analogues	Pyrimidine nucleotides	583.107	M+NH4	C15H25N3O16P2	5.9575	0.0297353	0	59.6	3.84175	2906-23-2	Pyrimidine nucleotide sugars	6.085	5.9125	6.0716	5.5836	5.3939	5.368	6.2994	6.3969	6.2236	5.8558	5.8571	5.7333	6.0003	5.9803	5.9764
pos_2416	1-Hydroxy-3-methoxy-7-primeverosyloxyxanthone	metab_1465	-	-	-	-	HMDB0030870	pos	-	-	-	-	Organoheterocyclic compounds	Benzopyrans	597.122	M+2Na-H	C25H28O14	5.91	0.0963168	0	81.3	6.19432	85761-72-4	1-benzopyrans	5.1555	4.7386	5.0712	3.8953	3.8713	3.8764	5.3268	5.3984	5.2883	4.3558	4.4883	4.1196	4.8351	4.7593	4.833
pos_2418	(-)-Gallocatechin gallate	metab_1467	-	-	-	-	HMDB0243513	pos	-	-	-	-	Phenylpropanoids and polyketides	Flavonoids	423.07	M+H-2H2O	C22H18O11	5.8943	0.0107215	0	69.6	-2.17873	-	Flavans	5.0959	5.25	4.8283	3.6252	3.6342	3.6393	5.1301	5.3511	5.1197	3.6437	3.6333	3.6307	4.8977	4.907	4.9033
pos_2430	Naringenin	metab_1481	-	map00943;map01100;map00941;map01110	Isoflavonoid biosynthesis;Metabolic pathways;Flavonoid biosynthesis;Biosynthesis of secondary metabolites	C00509	HMDB0002670;LMPK12140001;MJDBOTE0001138	pos	-	-	Metabolism;Metabolism;Metabolism;Metabolism	Biosynthesis of other secondary metabolites;Global and overview maps;Biosynthesis of other secondary metabolites;Global and overview maps	Phenylpropanoids and polyketides	Flavonoids	273.075	M+H	C15H12O5	5.6958	0.00487037	95	0	-2.22324	480-41-1	Flavans	5.4749	5.2704	5.337	3.3535	3.7821	3.2972	5.3169	5.3571	5.3424	3.3016	3.3053	3.2885	5.1454	5.1411	5.1431
pos_2431	P-coumaroyltyramine	metab_1482	-	-	-	-	HMDB0304448;HMDB0039521	pos	-	-	-	-	Phenylpropanoids and polyketides	Cinnamic acids and derivatives	284.127	M+H	C17H17NO3	5.6719	0.00893336	0	46	-2.39566	36417-86-4	Hydroxycinnamic acids and derivatives	4.9835	5.1627	4.8167	5.0725	4.9683	4.9212	5.0076	5.2585	5.3413	4.6473	4.5344	4.8201	5.0773	5.0734	5.0695
pos_2444	Alpha-(1,2-Dihydroxyethyl)-1,2,3,4-tetrahydro-7-hydroxy-9-methoxy-3,4-dioxocyclopenta[c][1]benzopyran-6-acetaldehyde	metab_1494	-	-	-	C19592	HMDB0062442	pos	-	-	-	-	Phenylpropanoids and polyketides	Coumarins and derivatives	331.08	M+H-H2O	C17H16O8	5.5373	0.0418668	0	84.6	-2.44838	-	Not Available	4.9868	5.0572	5.0759	4.6979	4.2919	4.4892	5.0902	5.0857	5.0368	4.8463	4.7988	4.7422	4.958	4.9595	4.9269
pos_2447	Niflumic Acid	metab_1497	-	-	-	C13698	HMDB0015573	pos	-	-	-	-	Benzenoids	Benzene and substituted derivatives	565.133	2M+H	C13H9F3N2O2	5.5131	0.0495772	0	67.4	4.26372	4394-00-7	Trifluoromethylbenzenes	3.624	3.4996	3.4974	5.5797	5.7487	5.6444	3.4768	3.6186	3.5086	5.0964	5.0663	5.0794	4.8393	4.8219	4.7962
pos_245	1-O-Sinapoylglucose	metab_1500	-	-	-	-	HMDB0041175	pos	-	-	-	-	Phenylpropanoids and polyketides	Cinnamic acids and derivatives	369.117	M+H-H2O, M+H	C17H22O10	4.8538	0.0346309	0	58.3	-1.81669	-	Hydroxycinnamic acids and derivatives	5.6952	5.7923	5.6596	5.2925	4.6428	5.0201	5.8719	5.8592	5.8533	5.2515	5.4424	5.2872	5.6444	5.6206	5.6171
pos_2454	5-Aminoimidazole ribonucleotide	metab_1505	-	map01100;map01110;map00230;map01240;map00730;map00860	Metabolic pathways;Biosynthesis of secondary metabolites;Purine metabolism;Biosynthesis of cofactors;Thiamine metabolism;Porphyrin metabolism	C03373	HMDB0001235;PW_C000955	pos	-	-	Metabolism;Metabolism;Metabolism;Metabolism;Metabolism;Metabolism	Global and overview maps;Global and overview maps;Nucleotide metabolism;Global and overview maps;Metabolism of cofactors and vitamins;Metabolism of cofactors and vitamins	Organic oxygen compounds	Organooxygen compounds	313.091	M+NH4	C8H14N3O7P	5.4416	0.0379568	0	54.9	0.535154	25635-88-5	Carbohydrates and carbohydrate conjugates	4.507	4.5071	4.6492	3.67	3.679	3.6842	4.9261	4.6998	4.9274	4.2736	4.3848	4.395	4.5939	4.5667	4.5648
pos_2459	(2R,3S)-Piscidic acid	metab_1509	-	-	-	-	HMDB0030809	pos	-	-	-	-	Phenylpropanoids and polyketides	Phenylpropanoic acids	221.044	M+H-2H2O	C11H12O7	5.3943	0.0153173	0	61.1	-1.40304	35388-57-9	Not Available	3.9259	3.9271	3.8386	4.5782	4.7053	4.7103	4.0324	4.0343	4.0705	4.7396	4.6739	4.6725	4.3247	4.3158	4.3118
pos_246	Quercetin 3-O-glucoside	metab_1510	-	map01100;map01110;map00944	Metabolic pathways;Biosynthesis of secondary metabolites;Flavone and flavonol biosynthesis	C05623	HMDB0037362	pos	-	-	Metabolism;Metabolism;Metabolism	Global and overview maps;Global and overview maps;Biosynthesis of other secondary metabolites	Phenylpropanoids and polyketides	Flavonoids	465.102	M+H, M+Na	C21H20O12	5.0607	0.00981051	80.4	0	-1.90577	21637-25-2;482-35-9	Flavonoid glycosides	6.1185	5.8425	5.9783	5.8063	5.8125	5.7837	6.1816	6.2306	6.0057	5.5892	5.6615	5.6451	5.9419	5.9432	5.9352
pos_2461	Isorhamnetin	metab_1512	-	-	-	C10084	LMPK12110002;HMDB0002655;MJDBOTE0001307	pos	-	-	-	-	Phenylpropanoids and polyketides	Flavonoids	317.065	M+H	C16H12O7	5.3704	0.0146906	89	0	-2.23837	480-19-3	Flavones	5.7569	5.5678	5.6791	5.5013	5.4523	5.4126	5.8906	5.8465	5.8269	5.3863	5.453	5.3815	5.654	5.6553	5.6436
pos_2463	Eutypine	metab_1514	-	-	-	C08448	HMDB0301834	pos	-	-	-	-	Organic oxygen compounds	Organooxygen compounds	219.101	M+CH3OH+H	C12H10O2	5.3625	0.015866	0	35.8	-2.27484	121007-17-8	Carbonyl compounds	4.535	4.4864	4.2882	4.1389	3.9391	3.8713	4.235	4.4573	4.4826	3.5133	3.5492	3.6614	4.2773	4.2908	4.2868
pos_2464	2-aceto-2-hydroxy-butanoate	metab_1515	-	-	-	-	HMDB0304056	pos	-	-	-	-	Organic acids and derivatives	Keto acids and derivatives	313.091	2M+Na	C6H9O4-	5.3386	0.0215012	0	61.7	5.73967	-	Short-chain keto acids and derivatives	4.5434	4.5393	4.5426	3.6682	3.6479	4.1463	4.9069	4.8381	5.0886	4.0568	4.4474	4.2236	4.6134	4.6243	4.6058
pos_248	Gerberinside	metab_1532	-	-	-	-	-	pos	-	-	-	-	-	-	339.107	M+H-2H2O, M+H	C16H18O8	5.1322	0.0120238	72.9	0	-2.11496	-	-	5.4532	5.6259	5.5469	5.3281	4.8746	5.0651	5.649	5.5975	5.6919	5.2126	5.399	5.2417	5.5117	5.5053	5.5014
pos_2483	Citpressine II	metab_1536	-	-	-	-	HMDB0029324	pos	-	-	-	-	Organoheterocyclic compounds	Quinolines and derivatives	333.147	M+NH4	C17H17NO5	5.1481	0.0359402	0	36.9	8.51889	81525-59-9	Benzoquinolines	3.09	3.35	3.1364	5.351	5.6848	5.6767	3.1158	3.0928	3.1475	5.2999	5.484	5.0904	5.0266	5.0022	4.998
pos_2488	Eriodictyol 7-(6-trans-p-coumaroylglucoside)	metab_1541	-	-	-	-	HMDB0039922	pos	-	-	-	-	Phenylpropanoids and polyketides	Flavonoids	597.159	M+H	C30H28O13	5.1004	0.061912	0	64.6	-2.22533	-	Flavonoid glycosides	5.8292	6.0021	5.8383	5.1012	5.0342	5.026	5.5393	5.563	5.5059	3.9586	3.9482	3.9455	5.6126	5.6145	5.5661
pos_2489	Resolvin E2	metab_1542	-	-	-	C18173	HMDB0257163;LMFA03140011	pos	-	-	-	-	Lipids and lipid-like molecules	Fatty Acyls	299.2	M+H-2H2O	C20H30O4	5.1004	0.0232414	0	86.5	-2.08308	-	Eicosanoids	4.6596	4.9458	4.8228	4.1455	3.596	4.1147	4.4581	3.8293	4.4954	3.6055	3.6674	3.5925	4.4875	4.4898	4.4711
pos_2492	Quercetin	metab_1546	-	map01100;map00941;map01110;map00944	Metabolic pathways;Flavonoid biosynthesis;Biosynthesis of secondary metabolites;Flavone and flavonol biosynthesis	C00389	HMDB0005794;LMPK12110004;MJDBOTE0001650	pos	-	-	Metabolism;Metabolism;Metabolism;Metabolism	Global and overview maps;Biosynthesis of other secondary metabolites;Global and overview maps;Biosynthesis of other secondary metabolites	Phenylpropanoids and polyketides	Flavonoids	303.049	M+H	C15H10O7	5.0607	0.0117708	89.1	0	-2.22755	117-39-5	Flavones	6.0963	5.8393	5.9835	5.9011	5.8724	5.8106	6.1261	6.183	5.9764	5.6261	5.7202	5.6644	5.932	5.9336	5.924
pos_2494	2-(S-Glutathionyl)acetyl glutathione	metab_1548	-	-	-	C14863	HMDB0060343	pos	-	-	-	-	Organic acids and derivatives	Carboxylic acids and derivatives	655.165	M+H	C22H34N6O13S2	5.0368	0.0354128	0	65.2	-7.6693	-	Amino acids, peptides, and analogues	5.9632	5.9423	5.9805	4.6176	4.9243	4.2333	5.6179	5.7029	5.8122	4.4127	4.5606	4.5295	5.6716	5.6509	5.6418
pos_2496	Rhamnazin 3-rutinoside	metab_1550	-	-	-	C17441	HMDB0037467;LMPK12112634	pos	-	-	-	-	Phenylpropanoids and polyketides	Flavonoids	639.191	M+H	C29H34O16	5.0209	0.0231095	0	59.5	-1.7529	64527-08-8	Flavonoid glycosides	4.9651	5.0928	4.8139	4.6431	4.0879	4.4139	5.5673	5.5066	5.3239	5.189	5.0999	5.0905	5.0784	5.0808	5.0622
pos_2502	Etoposide glucuronide	metab_1558	-	-	-	C11245	PW_C040592;HMDB0060635	pos	-	-	-	-	Organoheterocyclic compounds	Diazines	747.209	M+H-H2O	C35H40O19	4.9893	0.059781	0	32.8	-5.27352	100007-55-4	Pyrimidines and pyrimidine derivatives	5.6592	5.7753	5.6541	5.5317	4.7762	4.7813	5.8323	5.8151	5.81	5.3209	5.3895	5.3251	5.6999	5.7006	5.6545
pos_2503	Geranic Acid	metab_1559	-	map01110	Biosynthesis of secondary metabolites	C16461	HMDB0304369;LMFA01030784;HMDB0036103	pos	-	-	Metabolism	Global and overview maps	Lipids and lipid-like molecules	Prenol lipids	186.149	M+NH4	C10H16O2	4.9972	0.0377121	30.5	0	-1.73586	459-80-3	Monoterpenoids	4.2743	4.3497	4.5229	4.8134	4.6725	4.6888	4.4174	4.4105	4.4269	4.7168	4.689	4.8242	4.5358	4.5662	4.5623
pos_2504	Ferulic Acid	metab_1560	-	map01100;map00940;map01110	Metabolic pathways;Phenylpropanoid biosynthesis;Biosynthesis of secondary metabolites	C01494	HMDB0000954;MJDBOTE0000325	pos	-	-	Metabolism;Metabolism;Metabolism	Global and overview maps;Biosynthesis of other secondary metabolites;Global and overview maps	Phenylpropanoids and polyketides	Cinnamic acids and derivatives	177.054	M+H-H2O	C10H10O4	4.9972	0.00534211	90.6	0	-1.33641	537-98-4	Hydroxycinnamic acids and derivatives	5.5582	5.6199	5.6069	5.3914	4.91	5.0795	5.7221	5.7067	5.7114	5.3002	5.3825	5.2767	5.5191	5.5187	5.5149
pos_2508	O-O-glucuronide rosiglitazone	metab_1564	-	-	-	-	PW_C040634;HMDB0060857	pos	-	-	-	-	Organic oxygen compounds	Organooxygen compounds	613.154	M+ACN+Na	C24H27N3O10S	4.9494	0.0490104	0	74.9	-6.31531	-	Carbohydrates and carbohydrate conjugates	5.5992	5.87	5.7011	4.6216	4.772	4.4965	5.7679	5.6082	5.7645	4.1443	4.5761	4.2531	5.5503	5.5158	5.5123
pos_2510	Acetovanillone	metab_1567	-	-	-	C11380	HMDB0247918	pos	-	-	-	-	Organic oxygen compounds	Organooxygen compounds	167.07	M+H	C9H10O3	4.9174	0.0119806	0	31.5	-1.36144	498-02-2	Carbonyl compounds	5.2117	5.2064	5.2012	5.4937	5.4034	5.4103	4.9475	5.0894	5.1693	5.5682	5.567	5.5345	5.2884	5.2819	5.2782
pos_2511	4-coumaroylshikimate	metab_1568	-	map01100;map00941;map00940;map01110;map00945	Metabolic pathways;Flavonoid biosynthesis;Phenylpropanoid biosynthesis;Biosynthesis of secondary metabolites;Stilbenoid, diarylheptanoid and gingerol biosynthesis	C02947	HMDB0304174	pos	-	-	Metabolism;Metabolism;Metabolism;Metabolism;Metabolism	Global and overview maps;Biosynthesis of other secondary metabolites;Biosynthesis of other secondary metabolites;Global and overview maps;Biosynthesis of other secondary metabolites	Phenylpropanoids and polyketides	Cinnamic acids and derivatives	641.185	2M+H	C16H16O7	4.9014	0.0302567	0	47.2	-2.16578	-	Hydroxycinnamic acids and derivatives	5.7671	5.4683	5.5618	4.4886	4.4409	4.2705	5.0821	5.0061	5.1403	4.2749	4.2645	4.2618	5.2863	5.2667	5.2616
pos_2512	5-p-Coumaroylquinic acid	metab_1569	-	map00940;map00941;map01110;map00945	Phenylpropanoid biosynthesis;Flavonoid biosynthesis;Biosynthesis of secondary metabolites;Stilbenoid, diarylheptanoid and gingerol biosynthesis	C12208	HMDB0301709	pos	-	-	Metabolism;Metabolism;Metabolism;Metabolism	Biosynthesis of other secondary metabolites;Biosynthesis of other secondary metabolites;Global and overview maps;Biosynthesis of other secondary metabolites	Organic oxygen compounds	Organooxygen compounds	339.107	M+H	C16H18O8	4.8934	0.0273336	0	58.7	-1.91046	-	Alcohols and polyols	4.9441	5.0268	5.0266	4.5148	3.734	4.3071	4.7884	4.9194	4.8719	4.2596	4.5791	4.1991	4.8036	4.782	4.8017
pos_2514	Domoic acid	metab_1571	-	-	-	C13732	HMDB0033939	pos	-	-	-	-	Organic acids and derivatives	Carboxylic acids and derivatives	276.126	M+H-2H2O	C15H21NO6	4.8696	0.0259064	0	44.5	9.39452	14277-97-5	Amino acids, peptides, and analogues	3.3319	3.3805	3.3783	5.0523	5.5178	5.0546	3.3577	3.3347	3.3894	4.5909	4.9446	4.7559	4.6023	4.5972	4.5806
pos_2515	Scopoletin	metab_1572	-	map01110;map00999	Biosynthesis of secondary metabolites;Biosynthesis of various plant secondary metabolites	C01752	HMDB0034344;MJDBOTE0001128	pos	-	-	Metabolism;Metabolism	Global and overview maps;Biosynthesis of other secondary metabolites	Phenylpropanoids and polyketides	Coumarins and derivatives	175.039	M+H-H2O	C10H8O4	4.8617	0.0191157	0	48.1	-1.53622	92-61-5	Hydroxycoumarins	4.0873	4.1609	4.0771	2.9474	2.9565	2.9616	4.2507	4.3266	4.2964	3.3082	3.642	3.5384	4.0361	4.0376	4.0224
pos_2516	Sinapic Acid	metab_1573	-	map01100;map00940;map01110	Metabolic pathways;Phenylpropanoid biosynthesis;Biosynthesis of secondary metabolites	C00482	HMDB0032616;HMDB0034069;MJDBOTE0001099	pos	-	-	Metabolism;Metabolism;Metabolism	Global and overview maps;Biosynthesis of other secondary metabolites;Global and overview maps	Phenylpropanoids and polyketides	Cinnamic acids and derivatives	207.065	M+H-H2O	C11H12O5	4.8538	0.0165385	77.3	0	-1.47072	7361-90-2;530-59-6;7362-37-0;7362-37-0	Hydroxycinnamic acids and derivatives	5.4543	5.5132	5.4413	5.1308	4.717	4.9061	5.5759	5.5839	5.5973	5.0973	5.2298	5.068	5.3915	5.3813	5.3777
pos_2523	Aminomethylphosphonic acid	metab_1581	-	-	-	C11033	HMDB0240707	pos	-	-	-	-	Organic acids and derivatives	Organic phosphonic acids and derivatives	223.023	2M+H	CH6NO3P	4.7902	0.0142931	0	45.6	-4.3217	-	Organic phosphonic acids	4.3402	4.5253	4.4959	4.6657	4.7354	4.7495	4.3611	4.1909	4.3343	4.5123	4.6483	4.5827	4.4636	4.4758	4.4716
pos_2524	2-Acetolactate	metab_1582	-	-	-	C00900	HMDB0006833;LMFA01050472	pos	-	-	-	-	Organic acids and derivatives	Keto acids and derivatives	303.048	2M+K	C5H8O4	4.7824	0.0202309	0	34.4	0.0563973	-	Short-chain keto acids and derivatives	4.6072	4.5261	4.8806	5.1266	5.0399	4.9945	4.3311	4.3795	4.0118	4.6626	4.9078	4.7861	4.637	4.6393	4.623
pos_2527	Resveratrol	metab_1585	-	map01110;map00945	Biosynthesis of secondary metabolites;Stilbenoid, diarylheptanoid and gingerol biosynthesis	C03582	LMPK13090005;HMDB0041772;HMDB0003747;HMDB0034118;MJDBOTE0000329	pos	-	-	Metabolism;Metabolism	Global and overview maps;Biosynthesis of other secondary metabolites	Phenylpropanoids and polyketides	Stilbenes	229.086	M+H	C14H12O3	4.7664	0.0106998	79.2	0	-1.81656	501-36-0;61434-67-1	Not Available	4.8816	4.5425	4.8476	4.6594	4.4818	4.4577	3.9858	4.3873	4.1231	3.3694	3.359	3.3564	4.5112	4.5128	4.5041
pos_2531	Dehydrozingerone	metab_1590	-	-	-	C17840	HMDB0032591	pos	-	-	-	-	Phenylpropanoids and polyketides	Cinnamic acids and derivatives	225.112	M+CH3OH+H	C11H12O3	4.7267	0.0317957	0	41.8	-2.27295	1080-12-2	Hydroxycinnamic acids and derivatives	4.737	4.7683	4.8815	4.0212	3.9298	4.0077	4.5768	4.6165	4.9234	3.6097	3.8	3.4992	4.4989	4.5011	4.476
pos_2535	Vicenin 2	metab_1594	-	-	-	C10195	LMPK12110218;HMDB0030708	pos	-	-	-	-	Phenylpropanoids and polyketides	Flavonoids	595.164	M+H	C27H30O15	4.6947	0.0342169	67	0	-2.19001	23666-13-9	Flavonoid glycosides	5.2065	5.0482	5.3485	4.9633	4.6168	4.8744	5.0688	5.0753	5.1632	4.0942	4.4231	4.6606	5.0314	5.0046	5.0297
pos_2543	2'-Hydroxygenistein	metab_1603	-	map00943	Isoflavonoid biosynthesis	C12134	HMDB0034014;LMPK12050327	pos	-	-	Metabolism	Biosynthesis of other secondary metabolites	Phenylpropanoids and polyketides	Isoflavonoids	319.081	M+CH3OH+H	C15H10O6	4.6471	0.0211562	0	63.9	-2.48784	1156-78-1	Isoflav-2-enes	5.8172	5.6952	5.7734	5.5054	5.503	5.4505	5.2224	5.3119	5.6692	4.7295	4.9208	4.7175	5.5227	5.5243	5.5076
pos_2544	Epigallocatechin gallate	metab_1604	-	-	-	C09731	HMDB0003153	pos	-	-	-	-	Phenylpropanoids and polyketides	Flavonoids	491.118	M+CH3OH+H	C22H18O11	4.6075	0.00466436	0	83.5	-1.9188	989-51-5	Flavans	5.6234	5.3954	5.4063	4.7097	4.8	4.7564	4.9515	5.2978	5.0227	4.7283	4.7179	4.7152	5.1564	5.1571	5.1533
pos_2547	Marrubiin	metab_1607	-	-	-	C09128	-	pos	-	-	-	-	-	-	333.205	M+H	C20H28O4	4.5755	0.0147888	78.8	0	-2.25923	465-92-9	-	4.5062	4.9421	4.8592	3.3235	3.3325	3.4161	4.515	4.3488	4.9119	3.835	3.4526	3.3936	4.5365	4.5274	4.5241
pos_2548	Meloside	metab_1608	-	map00944	Flavone and flavonol biosynthesis	C04199	HMDB0302583	pos	-	-	Metabolism	Biosynthesis of other secondary metabolites	Phenylpropanoids and polyketides	Flavonoids	595.164	M+H	C27H30O15	4.5676	0.0279713	0	70.4	-2.3429	-	Flavonoid glycosides	5.0518	5.1821	5.2142	4.8106	4.3122	4.4722	5.1404	5.13	5.1634	4.3217	4.5699	4.3911	4.9475	4.9293	4.9247
pos_255	Petunidin 3-glucoside	metab_1610	-	map00942	Anthocyanin biosynthesis	C12139	HMDB0038097;LMPK12010349	pos	-	-	Metabolism	Biosynthesis of other secondary metabolites	Phenylpropanoids and polyketides	Flavonoids	479.117	M+H, M+Na	C22H22O12	5.3704	0.011746	80.4	0	-2.08607	6988-81-4;71991-88-3;6988-81-4	Flavonoid glycosides	5.7759	5.6385	5.6645	5.4589	5.3157	5.3929	6.0075	5.9608	5.9371	5.4853	5.4478	5.4001	5.7176	5.7193	5.7097
pos_2553	Biochanin A 7-(6-malonylglucoside)	metab_1614	-	map00943	Isoflavonoid biosynthesis	C12625	HMDB0030640	pos	-	-	Metabolism	Biosynthesis of other secondary metabolites	Phenylpropanoids and polyketides	Isoflavonoids	565.154	M+CH3OH+H	C25H24O13	4.5437	0.00421824	0	60.7	-1.94981	34232-17-2	Isoflavonoid O-glycosides	5.5731	5.7605	5.6447	5.2711	3.974	4.6651	6.0943	6.0575	6.0166	5.5856	5.5517	5.4884	5.7243	5.7207	5.7228
pos_2559	Flufenamic acid	metab_1620	-	-	-	C13038	HMDB0252331	pos	-	-	-	-	Benzenoids	Benzene and substituted derivatives	585.123	2M+Na	C14H10F3NO2	4.4802	0.0082972	0	38.9	1.7242	530-78-9	Benzoic acids and derivatives	5.7908	5.9914	5.7175	5.392	5.3158	5.4119	6.1575	6.1166	6.1963	5.1943	5.2736	5.1509	5.8344	5.831	5.8272
pos_2563	Kaempferol 3-O-beta-robinoside 7-O-alpha-L-rhamnopyranoside	metab_1625	-	-	-	C10178	HMDB0302847	pos	-	-	-	-	Phenylpropanoids and polyketides	Flavonoids	779.18	M+K	C33H40O19	4.4564	0.0175202	0	81.1	0.743636	-	Flavonoid glycosides	6.8349	6.7272	6.7398	5.9678	5.8801	5.9254	6.8117	6.6037	6.7061	5.4921	5.7972	5.5923	6.5692	6.5584	6.5546
pos_2564	Trans-Caffeic acid [apiosyl-(1->6)-glucosyl] ester	metab_1626	-	-	-	-	HMDB0033694	pos	-	-	-	-	Phenylpropanoids and polyketides	Cinnamic acids and derivatives	497.128	M+Na	C20H26O13	4.4245	0.0176106	0	47.2	2.86131	-	Hydroxycinnamic acids and derivatives	5.7466	5.7557	5.633	4.396	4.9998	4.6889	5.7261	5.9072	5.0438	4.4146	4.4042	4.4015	5.4702	5.4719	5.4578
pos_2565	2'-Deoxy-2'-methylenecytidine	metab_1627	-	-	-	-	HMDB0245533	pos	-	-	-	-	Organoheterocyclic compounds	Diazines	496.217	2M+NH4	C10H13N3O4	4.4086	0.136543	0	56.9	3.65916	-	Pyrimidines and pyrimidine derivatives	4.6855	5.0033	4.7658	3.9534	3.8916	3.6381	4.979	5.0737	5.0322	3.6424	3.6321	3.6294	4.487	4.5967	4.592
pos_2566	Theobromine	metab_1628	-	map01100;map01110;map00232	Metabolic pathways;Biosynthesis of secondary metabolites;Caffeine metabolism	C07480	PW_C001714;HMDB0002825;MJDBOTE0000804	pos	-	-	Metabolism;Metabolism;Metabolism	Global and overview maps;Global and overview maps;Biosynthesis of other secondary metabolites	Organoheterocyclic compounds	Imidazopyrimidines	219.028	M+K	C7H8N4O2	4.4086	0.0221942	0	30.2	2.75932	83-67-0	Purines and purine derivatives	4.9911	4.9923	4.804	3.1811	4.0797	3.7183	4.9438	5.1536	4.0715	3.2447	3.2716	3.1866	4.6099	4.5949	4.5921
pos_2567	Syringaldehyde	metab_1629	-	-	-	-	HMDB0258653	pos	-	-	-	-	Benzenoids	Phenols	183.065	M+H	C9H10O4	4.4007	0.0515427	35.6	0	-1.30365	-	Methoxyphenols	4.009	3.864	4.256	4.4287	4.3221	4.3875	3.9821	3.906	4.1351	4.4763	4.3727	4.3717	4.1946	4.2363	4.231
pos_2569	Purpurogallin	metab_1630	-	-	-	C09964	HMDB0256929	pos	-	-	-	-	Hydrocarbon derivatives	Tropones	221.044	M+H	C11H8O5	4.3609	0.0305993	0	75.5	-2.05177	569-77-7	Tropolones	3.8393	4.1342	3.8598	3.5577	4.1069	3.9498	4.8191	4.6583	4.6717	3.9089	4.3287	4.2902	4.4021	4.4037	4.4257
pos_2570	Estriol-17-glucuronide	metab_1632	-	-	-	C11346	HMDB0010333	pos	-	-	-	-	Lipids and lipid-like molecules	Steroids and steroid derivatives	482.237	M+NH4	C24H32O9	4.3529	0.0334574	0	30.5	-2.07774	7219-89-8	Steroidal glycosides	4.2054	5.0342	4.6952	4.2624	4.2715	4.2766	5.0144	5.1638	4.8528	4.281	4.2706	4.268	4.6086	4.5858	4.582
pos_2584	Dihydromyricetin 3-rhamnoside	metab_1644	-	-	-	-	HMDB0303822	pos	-	-	-	-	Phenylpropanoids and polyketides	Flavonoids	489.099	M+Na	C21H22O12	4.2013	0.00443379	0	82.6	-1.9447	-	Flavonoid glycosides	6.2059	6.0748	6.0948	5.9067	5.9329	5.8877	5.7058	5.9516	5.7399	5.0452	5.3403	5.0507	5.9366	5.9389	5.9351
pos_2588	Neocarlinoside	metab_1648	-	-	-	C10109	HMDB0037408;LMPK12110490	pos	-	-	-	-	Phenylpropanoids and polyketides	Flavonoids	581.149	M+H	C26H28O15	4.1617	0.0183893	0	52.1	-2.02596	83151-89-7	Flavonoid glycosides	4.7109	5.1422	4.807	4.4415	4.4505	4.4557	5.5328	5.49	5.5586	5.0005	5.0998	5.1823	5.0923	5.0817	5.0767
pos_2589	Kaempferol 3-(2G-apiosylrobinobioside)	metab_1649	-	-	-	-	HMDB0039759	pos	-	-	-	-	Phenylpropanoids and polyketides	Flavonoids	765.165	M+K	C32H38O19	4.1537	0.0153935	0	78.7	1.04104	132185-73-0	Flavonoid glycosides	7.3298	7.2549	7.2884	6.6248	6.6096	6.6039	7.3645	7.2484	7.2274	6.4853	6.6673	6.4983	7.1297	7.1205	7.1167
pos_259	12-oxo-PDA	metab_1650	-	map01100;map00592;map01110	Metabolic pathways;alpha-Linolenic acid metabolism;Biosynthesis of secondary metabolites	C01226	HMDB0301804;LMFA02010001;HMDB0302724	pos	-	-	Metabolism;Metabolism;Metabolism	Global and overview maps;Lipid metabolism;Global and overview maps	Lipids and lipid-like molecules	Fatty Acyls	293.21	M+H-H2O, M+H	C18H28O3	5.7516	0.0273782	0	38.5	-2.42148	85551-10-6	Eicosanoids	5.1454	4.7816	5.4599	5.0528	5.0005	4.966	4.5825	4.6312	5.1123	4.199	4.301	4.1296	4.9894	4.9693	4.9686
pos_2590	Kaempferol-3-O-alpha-L-arabinoside	metab_1651	-	-	-	-	-	pos	-	-	-	-	-	-	419.096	M+H	C20H18O10	4.1537	0.008559	92.2	0	-2.29169	-	-	6.2458	5.949	6.028	5.2265	5.274	5.1195	5.7571	6.0591	5.3364	3.1701	4.4995	3.1571	5.8215	5.8178	5.814
pos_2597	Trifolin	metab_1658	-	map01110;map00944	Biosynthesis of secondary metabolites;Flavone and flavonol biosynthesis	C12626	LMPK12111663;HMDB0030864;HMDB0257804;HMDB0304745	pos	-	-	Metabolism;Metabolism	Global and overview maps;Biosynthesis of other secondary metabolites	Organoheterocyclic compounds	Pyrans	897.205	2M+H	C21H20O11	4.0821	0.0534005	0	54.5	-3.28762	23627-87-4	Pyranones and derivatives	6.4527	6.2851	6.0881	5.7333	5.6172	5.6166	6.0313	6.4762	5.9874	4.4102	5.1272	4.3994	6.092	6.0939	6.0522
pos_2602	3-O-beta-D-Galactopyranuronosyl-D-galactose	metab_1665	-	-	-	-	HMDB0039726	pos	-	-	-	-	Organic oxygen compounds	Organooxygen compounds	751.149	2M+K	C12H20O12	4.0422	0.0136809	0	61.7	-7.28277	7268-75-9	Carbohydrates and carbohydrate conjugates	6.8271	6.7563	6.7443	6.0418	6.0208	5.9418	6.7839	6.7214	6.6837	5.8014	6.0548	5.7815	6.6082	6.6003	6.5965
pos_2607	Apigenin 7-(6''-malonylglucoside)	metab_1669	-	-	-	C10020	HMDB0301863;LMPK12110373	pos	-	-	-	-	Phenylpropanoids and polyketides	Flavonoids	517.097	M+H-H2O	C24H22O14	4.0106	0.0466838	0	70.3	-1.85311	-	Flavonoid glycosides	5.1137	5.1452	4.9715	4.8289	4.6208	4.8964	5.263	5.2652	5.2917	4.8029	5.0728	4.8778	5.0085	5.0426	5.0074
pos_2614	APIGENIN-7-GLUCOSIDE	metab_1677	-	map00944	Flavone and flavonol biosynthesis	C04608	HMDB0037340	pos	-	-	Metabolism	Biosynthesis of other secondary metabolites	Phenylpropanoids and polyketides	Flavonoids	433.112	M+H	C21H20O10	3.9707	0.00282602	91.1	0	-1.64883	578-74-5	Flavonoid glycosides	6.2789	5.5589	6.0832	5.5121	5.4224	5.4971	6.149	6.1217	5.4435	4.8798	5.1116	4.8033	5.8796	5.8777	5.8773
pos_2617	3,4-Dihydro-2H-1-benzopyran-2-one	metab_1680	-	map00999	Biosynthesis of various plant secondary metabolites	C02274	HMDB0036626	pos	-	-	Metabolism	Biosynthesis of other secondary metabolites	Phenylpropanoids and polyketides	3,4-dihydrocoumarins	149.06	M+H	C9H8O2	3.9707	0.0326926	0	31.8	-1.20689	119-84-6	Not Available	4.1781	4.4961	4.572	4.4245	3.8462	4.1214	4.8725	4.8255	4.8846	4.5658	4.6702	4.4548	4.6306	4.6047	4.6282
pos_2623	Halleridone	metab_1687	-	-	-	-	HMDB0302803	pos	-	-	-	-	Organoheterocyclic compounds	Benzofurans	137.06	M+H-H2O	C8H10O3	3.8912	0.0286663	0	32.5	-1.0092	-	Not Available	4.726	4.6198	5.1618	4.8774	4.8827	4.8958	4.1819	4.2651	4.3831	4.9431	5.0085	4.7975	4.7341	4.7356	4.7562
pos_2638	Kaempferol-3-O-rutinoside	metab_1703	-	map01110;map00944	Biosynthesis of secondary metabolites;Flavone and flavonol biosynthesis	C21833	HMDB0037574	pos	-	-	Metabolism;Metabolism	Global and overview maps;Biosynthesis of other secondary metabolites	Phenylpropanoids and polyketides	Flavonoids	595.165	M+H	C27H30O15	3.764	0.0206037	93.5	0	-1.96941	17297-56-2;17650-84-9	Flavonoid glycosides	7.3292	7.2149	7.4844	7.0388	7.0042	7.007	6.3969	6.7019	6.4479	5.7293	6.0003	5.7287	7.0551	7.0419	7.0381
pos_2642	Sennidin C	metab_1708	-	-	-	C16797	HMDB0034318	pos	-	-	-	-	Benzenoids	Anthracenes	489.099	M+H-2H2O	C30H20O9	3.7003	0.00566144	0	64	4.71991	5355-93-1	Anthracenecarboxylic acids and derivatives	6.5292	6.5242	6.5182	6.3766	6.3929	6.3694	6.4713	6.5244	6.2971	5.8187	6.0279	5.862	6.5155	6.5106	6.5133
pos_2644	Armillarisin A	metab_1710	-	-	-	-	HMDB0248606	pos	-	-	-	-	Phenylpropanoids and polyketides	Coumarins and derivatives	257.044	M+Na	C12H10O5	3.6923	0.0414317	0	40.8	7.62785	-	Hydroxycoumarins	5.6408	5.4768	5.5576	4.9757	4.9583	4.9642	5.2439	5.4993	4.9239	3.592	4.1532	3.579	5.2946	5.2965	5.3264
pos_2645	Methylglutaryl-CoA	metab_1711	-	-	-	-	HMDB0254647	pos	-	-	-	-	Not Available	Not Available	913.2	M+NH4	C27H44N7O19P3S	3.6685	0.193019	0	53.6	4.31255	-	Not Available	5.3341	5.2653	5.3478	5.2659	5.3297	5.267	4.8152	5.0779	4.8771	4.4764	4.466	4.4633	5.4623	5.3083	5.4651
pos_2647	Glycitin	metab_1713	-	map00943	Isoflavonoid biosynthesis	C16195	LMPK12050096;HMDB0002219;MJDBOTE0001057	pos	-	-	Metabolism	Biosynthesis of other secondary metabolites	Phenylpropanoids and polyketides	Isoflavonoids	464.154	M+NH4	C22H22O10	3.6366	0.0760759	0	59	-2.39602	40246-10-4	Isoflavonoid O-glycosides	3.6225	3.6711	3.6689	3.6795	3.6886	3.6937	5.1692	5.2171	4.608	3.6981	3.6877	3.685	4.248	4.1975	4.1875
pos_2652	Coumarin	metab_1719	-	map01110;map00999	Biosynthesis of secondary metabolites;Biosynthesis of various plant secondary metabolites	C05851	HMDB0001218	pos	-	-	Metabolism;Metabolism	Global and overview maps;Biosynthesis of other secondary metabolites	Phenylpropanoids and polyketides	Coumarins and derivatives	164.07	M+NH4	C9H6O2	3.581	0.0598761	79.5	0	-1.89722	91-64-5	Not Available	3.1861	3.2347	3.4423	4.6397	4.7144	4.6014	3.8119	3.189	4.2318	4.8147	4.8072	4.7913	4.1081	4.0607	4.1049
pos_2655	Adipoyl-CoA	metab_1722	-	map01100	Metabolic pathways	C14143	HMDB0004047;LMFA07050284	pos	-	-	Metabolism	Global and overview maps	Lipids and lipid-like molecules	Fatty Acyls	913.2	M+NH4	C27H44N7O19P3S	3.5491	0.0459154	0	54.5	4.49459	25119-42-0	Fatty acyl thioesters	6.2409	6.1141	6.0271	5.4393	5.0232	5.1091	5.2128	5.8327	4.7894	4.1267	4.1163	4.1136	5.6792	5.681	5.6451
pos_2659	Kaempferol 3-O-Sophoroside	metab_1725	-	map01110;map00944	Biosynthesis of secondary metabolites;Flavone and flavonol biosynthesis	C12634	HMDB0304696	pos	-	-	Metabolism;Metabolism	Global and overview maps;Biosynthesis of other secondary metabolites	Phenylpropanoids and polyketides	Flavonoids	611.16	M+H	C27H30O16	3.5095	0.0309235	91.2	0	-1.83115	-	Flavonoid glycosides	7.3543	7.328	7.114	6.7818	6.7727	6.7913	6.5448	7.0578	6.3397	5.8273	6.1456	5.8663	7.0005	6.9797	6.9758
pos_2662	Gentiopicroside	metab_1729	-	map01110;map00902	Biosynthesis of secondary metabolites;Monoterpenoid biosynthesis	C09782	HMDB0252696	pos	-	-	Metabolism;Metabolism	Global and overview maps;Metabolism of terpenoids and polyketides	Organic oxygen compounds	Organooxygen compounds	751.184	2M+K	C16H20O9	3.4621	0.0216168	0	62.7	-1.18196	20831-76-9	Carbohydrates and carbohydrate conjugates	6.3584	6.443	6.1282	5.3237	5.3545	5.2991	5.7289	6.005	5.931	3.8948	3.8706	3.8679	5.9966	5.9886	5.9778
pos_2663	4-Hydroxy-3-(3-methyl-2-butenyl)acetophenone	metab_1730	-	-	-	C10702	HMDB0030770	pos	-	-	-	-	Organic oxygen compounds	Organooxygen compounds	222.148	M+NH4	C13H16O2	3.4621	0.0937803	0	52.4	-1.79369	26932-05-8	Carbonyl compounds	4.5271	4.686	4.6232	3.8611	3.4072	3.4124	4.0629	4.0937	3.7772	3.4167	3.4064	3.4037	4.299	4.2312	4.2291
pos_2680	6-Hydroxy-5,7-dimethyl-2-methylamino-4-(3-pyridylmethyl)benzothiazole	metab_1749	-	-	-	C11593	HMDB0251659	pos	-	-	-	-	Organoheterocyclic compounds	Benzothiazoles	640.25	2M+ACN+H	C16H17N3OS	3.375	0.0879936	0	42.1	-4.44247	-	Not Available	5.1232	4.0528	5.3114	4.3709	4.612	4.9207	4.7298	4.3844	4.4449	4.0798	4.0694	4.0667	4.8267	4.7633	4.7609
pos_2735	2-Hydroxy-3-(4-hydroxyphenyl)propenoic acid	metab_1807	-	map01100;map00350	Metabolic pathways;Tyrosine metabolism	C05350	PW_C003007;HMDB0006915	pos	-	-	Metabolism;Metabolism	Global and overview maps;Amino acid metabolism	Benzenoids	Benzene and substituted derivatives	213.075	M+CH3OH+H	C9H8O4	3.1293	0.0106359	0	62	-2.12314	-	Phenylpyruvic acid derivatives	4.6634	4.4461	4.493	4.0938	4.3825	4.5133	4.4588	4.6	4.447	3.9375	4.1095	4.0093	4.4187	4.4136	4.4095
pos_2743	Phenylglyoxylic acid	metab_1816	-	map01100;map00360	Metabolic pathways;Phenylalanine metabolism	C02137	HMDB0001587	pos	-	-	Metabolism;Metabolism	Global and overview maps;Amino acid metabolism	Benzenoids	Benzene and substituted derivatives	133.028	M+H-H2O	C8H6O3	3.0973	0.0474355	0	36.7	-0.636276	611-73-4	Benzoyl derivatives	3.9825	4.0311	4.0289	4.531	4.6317	4.582	4.0083	3.9854	4.0401	4.3832	4.5403	4.3786	4.0399	4.0418	4.076
pos_2756	2-(3-Carboxy-3-(methylammonio)propyl)-L-histidine	metab_1829	-	-	-	C04692	HMDB0011654	pos	-	-	-	-	Organic acids and derivatives	Carboxylic acids and derivatives	304.176	M+CH3OH+H	C11H19N4O4+	3.0098	0.0244034	0	53.2	7.68673	-	Amino acids, peptides, and analogues	4.2891	4.4463	3.5593	5.58	5.2169	5.2958	4.3807	4.4706	4.3089	5.292	5.3311	5.3103	4.9728	4.957	4.9528
pos_2772	Imidazolone A	metab_1847	-	-	-	-	HMDB0253421	pos	-	-	-	-	Organic acids and derivatives	Carboxylic acids and derivatives	360.19	M+ACN+H	C12H22N4O6	2.8984	0.0481336	0	40	5.54005	-	Amino acids, peptides, and analogues	4.6982	4.5763	4.6352	4.8959	5.0662	4.8866	4.5846	4.6477	4.7534	4.8591	4.9712	5.0307	4.8406	4.807	4.803
pos_2773	Ser-Leu	metab_1848	-	-	-	-	HMDB0029043;HMDB0258242	pos	-	-	-	-	Organic acids and derivatives	Carboxylic acids and derivatives	219.133	M+H	C9H18N2O4	2.8984	0.0381399	0	66	-2.02333	6665-16-3	Amino acids, peptides, and analogues	5.0434	4.4822	4.6356	4.2855	4.3585	4.3658	3.8063	3.777	3.615	3.2313	3.221	3.2183	4.41	4.4403	4.4141
pos_2789	Formyl-5-hydroxykynurenamine	metab_1864	-	map00380	Tryptophan metabolism	C05647	PW_C008135;HMDB0012948	pos	-	-	Metabolism	Amino acid metabolism	Organic oxygen compounds	Organooxygen compounds	191.081	M+H-H2O	C10H12N2O3	2.8109	0.00806303	0	72.2	-1.27583	958733-17-0	Carbonyl compounds	4.5928	5.0269	4.5663	3.6242	3.375	3.3801	4.8866	4.1827	4.7485	3.6012	3.5325	3.8608	4.5055	4.4989	4.5002
pos_2805	5-Hydroxypentanoic acid	metab_1883	-	-	-	C02804	HMDB0061927	pos	-	-	-	-	Lipids and lipid-like molecules	Fatty Acyls	254.161	2M+NH4	C5H10O3	2.771	0.0260405	0	47.3	3.53801	13392-69-3	Fatty acids and conjugates	4.1759	4.2588	4.1948	5.4413	5.2599	5.4376	4.6913	4.6882	4.5006	5.6816	5.6081	5.5346	5.0836	5.085	5.0646
pos_281	3-ketosphingosine	metab_1888	-	-	-	C06121	HMDB0245914;LMSP01010002	pos	-	-	-	-	Organic oxygen compounds	Organooxygen compounds	298.273	M+H-2H2O, M+H	C18H35NO2	6.3126	0.00276018	64.6	0	-1.99688	-	Carbonyl compounds	6.7009	6.7612	6.6987	6.4508	6.2948	6.3047	6.3785	6.3993	6.473	6.1072	6.0123	6.0775	6.4958	6.4939	6.4937
pos_2823	Gynocardin	metab_1903	-	-	-	C08331	HMDB0029913	pos	-	-	-	-	Organic oxygen compounds	Organooxygen compounds	286.092	M+H-H2O	C12H17NO8	2.7554	0.0105896	0	65.4	-1.83718	14332-17-3	Carbohydrates and carbohydrate conjugates	5.4769	5.6242	5.5435	5.3713	5.1488	5.0623	5.5633	5.6788	5.835	5.306	5.2425	5.2555	5.511	5.5125	5.5039
pos_2830	2-Hydroxyacetophenone	metab_1911	-	-	-	C07189	HMDB0032568;HMDB0245150	pos	-	-	-	-	Organic oxygen compounds	Organooxygen compounds	137.06	M+H	C8H8O2	2.7554	0.00688947	58.8	0	-1.01918	582-24-1;118-93-4	Carbonyl compounds	5.4933	5.7451	5.4997	4.9943	4.838	4.8803	6.1991	6.1202	6.1037	5.008	5.0731	4.897	5.8159	5.8175	5.8117
pos_2833	4-Methyl-5-Thiazoleethanol	metab_1914	-	map00730;map01100;map01240	Thiamine metabolism;Metabolic pathways;Biosynthesis of cofactors	C04294	HMDB0032985	pos	-	-	Metabolism;Metabolism;Metabolism	Metabolism of cofactors and vitamins;Global and overview maps;Global and overview maps	Organoheterocyclic compounds	Azoles	144.048	M+H	C6H9NOS	2.7554	0.0201878	73.1	0	-1.20743	137-00-8	Thiazoles	4.5184	4.4274	4.5563	5.1687	5.0301	5.111	4.5118	4.2953	4.3709	5.1393	5.1145	5.1083	4.7913	4.793	4.7769
pos_284	Phytosphingosine	metab_1921	-	map00600;map01100	Sphingolipid metabolism;Metabolic pathways	C12144	LMSP01030001;HMDB0004610	pos	-	-	Metabolism;Metabolism	Lipid metabolism;Global and overview maps	Organic nitrogen compounds	Organonitrogen compounds	318.3	M+H-H2O, M+H	C18H39NO3	6.3524	0.00453797	82.3	0	-2.14914	554-62-1	Amines	7.7904	7.7982	7.8356	7.2765	7.4578	7.5459	7.9862	7.8942	7.9785	7.469	7.4574	7.6232	7.7617	7.7624	7.7587
pos_2852	Atn-161	metab_1935	-	-	-	-	HMDB0248703	pos	-	-	-	-	Organic acids and derivatives	Carboxylic acids and derivatives	661.244	M+ACN+Na	C23H35N9O8S	2.7155	0.051575	0	91.2	-8.10803	-	Amino acids, peptides, and analogues	4.5129	4.5615	4.5593	4.57	4.579	4.5841	5.3212	5.0495	5.2846	4.9074	4.6394	4.8834	4.6085	4.5718	4.5688
pos_2853	Pinolidoxin	metab_1936	-	-	-	C08503	HMDB0301836	pos	-	-	-	-	Organoheterocyclic compounds	Oxocins	383.144	M+2Na-H	C18H26O6	2.7155	0.0204347	0	45.7	0.0186016	152985-39-2	Not Available	4.8693	4.7333	5.0217	4.3706	4.375	4.3728	4.6927	4.5135	4.4943	4.2215	4.1117	4.0462	4.5987	4.6134	4.6148
pos_287	Sphinganine	metab_1954	-	map00600;map01100	Sphingolipid metabolism;Metabolic pathways	C00836	HMDB0000269;PW_C000184;HMDB0242634;LMSP01020001	pos	-	-	Metabolism;Metabolism	Lipid metabolism;Global and overview maps	Organic nitrogen compounds	Organonitrogen compounds	302.305	M+H-H2O, M+H	C18H39NO2	6.3922	0.0063606	83.5	0	-2.06195	764-22-7	Amines	6.6111	6.833	6.6603	6.3548	6.3696	6.4168	7.0639	6.9488	6.9153	6.4498	6.319	6.5283	6.729	6.7275	6.7237
pos_2874	5'-Deoxyadenosine	metab_1959	-	-	-	C05198	HMDB0001983	pos	-	-	-	-	Nucleosides, nucleotides, and analogues	5''-deoxyribonucleosides	252.109	M+H	C10H13N5O3	2.6037	0.0278207	75.1	0	-1.86991	4754-39-6	Not Available	5.097	5.2115	5.6961	5.8491	5.824	5.8353	4.4637	4.8039	4.8086	5.4918	5.5887	5.5446	5.4171	5.3986	5.3946
pos_2883	4-(2-Amino-3-hydroxyphenyl)-2,4-dioxobutanoic acid	metab_1969	-	map00380	Tryptophan metabolism	C05645	HMDB0004083;PW_C002053	pos	-	-	Metabolism	Amino acid metabolism	Organic oxygen compounds	Organooxygen compounds	224.055	M+H	C10H9NO5	2.5079	0.0181829	0	49	-1.36754	857760-67-9	Carbonyl compounds	4.4168	4.1931	4.4326	4.6454	4.6427	4.8349	4.2001	4.1977	4.2931	4.6867	4.5997	4.7717	4.4984	4.5107	4.496
pos_2917	Epinine	metab_2007	-	-	-	C07453	HMDB0032020	pos	-	-	-	-	Benzenoids	Phenols	209.128	M+ACN+H	C9H13NO2	1.7468	0.0163747	0	32.4	-1.96605	501-15-5	Benzenediols	4.7528	4.9705	4.7472	3.7728	3.0869	3.6007	4.8202	4.8148	4.7314	3.223	3.4691	3.6407	4.6811	4.6712	4.6673
pos_2938	Pyroglutamic Acid	metab_2028	-	map01100;map00480	Metabolic pathways;Glutathione metabolism	C01879	PW_C000182;HMDB0000267;MJDBOTE0000549	pos	Peptides	Amino acids	Metabolism;Metabolism	Global and overview maps;Metabolism of other amino acids	Organic acids and derivatives	Carboxylic acids and derivatives	130.05	M+H	C5H7NO3	1.4677	0.00699074	84	0	-0.531331	98-79-3	Amino acids, peptides, and analogues	5.9333	6.1184	6.221	6.4251	6.3353	6.3711	5.8172	5.8406	5.8846	6.2903	6.2631	6.2433	6.121	6.1226	6.1269
pos_2942	4-Benzyl-2-methyl-1,2,4-thiadiazolidine-3,5-dione	metab_2033	-	-	-	-	HMDB0258758	pos	-	-	-	-	Benzenoids	Benzene and substituted derivatives	261.009	M+K	C10H10N2O2S	1.4518	0.0153143	0	36.5	-3.29323	-	Not Available	4.8099	5.0474	4.9527	5.512	5.4983	5.3916	4.4779	4.2772	3.7274	5.2044	5.094	5.323	4.9716	4.9846	4.9807
pos_2946	Niacinamide	metab_2037	-	map01100;map00760;map01240	Metabolic pathways;Nicotinate and nicotinamide metabolism;Biosynthesis of cofactors	C00153	HMDB0001406;PW_C001086	pos	Vitamins and cofactors	Vitamins	Metabolism;Metabolism;Metabolism	Global and overview maps;Metabolism of cofactors and vitamins;Global and overview maps	Organoheterocyclic compounds	Pyridines and derivatives	123.055	M+H	C6H6N2O	1.3722	0.00798731	48.8	0	0.117267	98-92-0	Pyridinecarboxylic acids and derivatives	4.8786	4.948	5.0062	5.7317	5.7243	5.7028	4.916	4.9106	4.9617	5.7478	5.756	5.7259	5.3571	5.3586	5.3637
pos_2954	Glucosidetathione	metab_2046	-	-	-	-	-	pos	-	-	-	-	-	-	308.09	M+H	C10H17N3O6S	1.285	0.00833818	89.4	0	-2.07379	-	-	3.2601	5.4776	3.3065	6.1599	6.3568	6.1289	3.2859	3.2629	4.1599	6.0044	6.376	6.0813	5.6486	5.6452	5.6414
pos_2977	Glucosylisomaltol	metab_2070	-	-	-	-	HMDB0038341	pos	-	-	-	-	Organic oxygen compounds	Organooxygen compounds	271.081	M+H-H2O	C12H16O8	1.1024	0.00731723	0	57.1	-1.81412	85559-61-1	Carbohydrates and carbohydrate conjugates	4.9917	5.1044	4.9642	4.9796	4.8752	4.7615	5.2209	5.2511	5.4125	5.0968	5.0066	4.8539	5.0738	5.0714	5.0675
pos_3007	Stachyose	metab_2103	-	map01100;map00052	Metabolic pathways;Galactose metabolism	C01613	HMDB0003553;PW_C001923;MJDBOTE0000475	pos	-	-	Metabolism;Metabolism	Global and overview maps;Carbohydrate metabolism	Organic oxygen compounds	Organooxygen compounds	705.184	M+K	C24H42O21	0.9131	0.00145893	0	45.6	-0.889613	10094-58-3;470-55-3;470-55-3	Carbohydrates and carbohydrate conjugates	5.7494	5.8399	5.6695	5.5339	5.5842	5.5282	6.2684	6.2774	6.5744	5.6345	5.8493	5.5213	5.9575	5.9565	5.9577
pos_3093	1-Naphthalenesulfonic acid, 3,4-dihydro-3,4-dioxo-	metab_2196	-	-	-	-	HMDB0245592	pos	-	-	-	-	Benzenoids	Naphthalenes	202.98	M+H-2H2O	C10H6O5S	0.7707	0.0226928	0	36.6	0.370176	-	Naphthoquinones	4.1279	4.0508	4.4369	4.7974	4.821	4.9919	3.8218	3.4812	3.1784	4.6266	4.5928	4.7808	4.4178	4.4142	4.3991
pos_33	Xanthurenate-8-O-beta-D-glucoside	metab_2326	-	-	-	-	HMDB0013118	pos	-	-	-	-	Organic oxygen compounds	Organooxygen compounds	350.086	M+H-H2O, M+H, M+H-2H2O	C16H17NO9	2.9781	0.0163839	0	37.6	-1.81196	97451-32-6	Carbohydrates and carbohydrate conjugates	5.7136	5.7161	5.8374	5.5618	5.4146	5.6051	5.6965	5.6638	5.9804	5.4703	5.3921	5.4745	5.677	5.6671	5.6632
pos_342	PC(18:0/0:0)	metab_2339	-	map00564	Glycerophospholipid metabolism	C04230	LMGP01050026;HMDB0010384	pos	Lipids	Phospholipids	Metabolism	Lipid metabolism	Lipids and lipid-like molecules	Glycerophospholipids	524.37	M+H, M+Na	C26H54NO7P	7.0266	0.0141751	90.3	0	-1.16944	19420-57-6	Glycerophosphocholines	7.2297	7.2588	6.7867	6.9464	6.4328	6.6966	7.4132	7.4115	7.4136	7.0261	6.9325	6.9661	7.218	7.2301	7.2262
pos_371	PS(20:3(8Z,11Z,14Z)-2OH(5,6)/22:0)	metab_2371	-	-	-	-	HMDB0282919	pos	-	-	-	-	Not Available	Not Available	965.614	M+CH3OH+H, M+ACN+Na	C48H88NO12P	7.4713	0.0437798	0	36.5	-6.74187	-	Not Available	6.2376	6.054	6.1926	5.1277	6.1453	5.7925	6.1865	6.0299	6.2391	4.9709	5.6383	5.7495	6.1877	6.1506	6.1775
pos_39	Dihydroceramide	metab_2391	-	map00600;map01100	Sphingolipid metabolism;Metabolic pathways	C12126	HMDB0006752;HMDB0011761;PW_C002905	pos	-	-	Metabolism;Metabolism	Lipid metabolism;Global and overview maps	Organic acids and derivatives	Carboxylic acids and derivatives	330.3	M+H-H2O, M+H, M+H-2H2O	C19H39NO3	6.4239	0.0109626	0	57.1	-2.19061	2304-80-5	Carboxylic acid derivatives	7.2559	7.3101	7.3328	6.7878	7.1147	7.3149	7.7627	7.6691	7.612	7.1412	6.7077	7.3154	7.3978	7.3886	7.3955
pos_41	Astragalin	metab_2414	-	map01110;map00944	Biosynthesis of secondary metabolites;Flavone and flavonol biosynthesis	C12249	LMPK12111725;HMDB0037429	pos	-	-	Metabolism;Metabolism	Global and overview maps;Biosynthesis of other secondary metabolites	Phenylpropanoids and polyketides	Flavonoids	449.107	M+H, 2M+H, M+Na	C21H20O11	3.7003	0.0026306	88.3	0	-2.16916	480-10-4	Flavonoid glycosides	9.0431	8.8712	8.9343	8.5023	8.5122	8.4883	8.6684	8.864	8.4325	7.9379	8.1225	7.9613	8.7457	8.7448	8.7434
pos_429	PE(18:1(9Z)/0:0)	metab_2435	-	-	-	-	LMGP02050004	pos	-	-	-	-	-	-	480.308	M+H, M+Na	C23H46NO7P	6.686	0.0178952	86.3	0	-1.40222	-	-	5.899	5.9151	5.8149	5.4655	5.9708	5.7761	6.1578	6.1423	6.0397	5.7582	5.8702	5.5487	6.0202	6.0057	6.0179
pos_442	4-Ethyl-7,11-dimethyldodeca-trans-2-trans-6-1-o-trien-1-al	metab_2450	-	-	-	-	HMDB0302403	pos	-	-	-	-	Lipids and lipid-like molecules	Prenol lipids	252.232	M+H, M+NH4	C16H26O	6.5906	0.00971272	0	41.7	-1.36717	-	Monoterpenoids	5.3286	5.2483	5.5115	5.8044	5.6197	5.7111	5.3393	5.3359	5.4572	5.6434	5.7336	5.7742	5.5124	5.5139	5.5059
pos_475	16-B1-phytoprostane	metab_2485	-	-	-	-	HMDB0304634	pos	-	-	-	-	Lipids and lipid-like molecules	Fatty Acyls	291.195	M+H-H2O, M+H	C18H28O4	6.2258	0.0379803	0	68.6	-2.10512	-	Eicosanoids	5.9676	5.6699	5.9201	5.0608	5.0007	4.9717	5.2504	5.2159	5.3629	4.5078	4.3746	4.0611	5.5369	5.5076	5.5361
pos_492	Vanillic acid	metab_2504	-	-	-	C06672	HMDB0004815;HMDB0000484;HMDB0240266	pos	-	-	-	-	Benzenoids	Benzene and substituted derivatives	151.039	M+H-H2O, M+H	C8H8O4	5.0607	0.00802781	37.5	0	-1.69077	499-76-3;121-34-6;3943-74-6	Benzoic acids and derivatives	5.2167	5.0979	5.2143	5.0218	5.0231	5.0577	5.2469	5.1918	5.3605	4.9269	5.035	4.8713	5.1229	5.1274	5.1206
pos_494	Oxyphenbutazone	metab_2506	-	-	-	C19494	HMDB0256021	pos	-	-	-	-	Benzenoids	Phenols	369.117	M+H, M+2Na-H	C19H20N2O3	4.9972	0.00716079	0	45.8	-3.94749	129-20-4	1-hydroxy-2-unsubstituted benzenoids	6.1404	6.2195	6.1705	5.8677	5.1776	5.5259	6.2976	6.2674	6.2919	5.7726	5.8775	5.7634	6.0888	6.0865	6.0826
pos_495	Trans-p-Feruloyl-beta-D-glucopyranoside	metab_2507	-	-	-	C17759	HMDB0301717;HMDB0301952	pos	-	-	-	-	Organic oxygen compounds	Organooxygen compounds	339.107	M+H-H2O, M+H	C16H20O9	4.9972	0.0155708	0	48.3	-1.88896	537-98-4	Carbohydrates and carbohydrate conjugates	5.5691	5.6441	5.5784	5.353	4.7156	4.8794	5.6998	5.7065	5.6724	5.1564	5.2523	5.1515	5.4849	5.4722	5.4827
pos_496	Juglone	metab_2508	-	-	-	C03840	HMDB0030773;MJDBOTE0001015	pos	-	-	-	-	Benzenoids	Naphthalenes	207.065	M+H, M+CH3OH+H	C10H6O3	4.9972	0.0045978	0	36.8	-1.98129	481-39-0	Naphthoquinones	5.8069	5.8467	5.8844	5.5576	5.2356	5.352	5.9101	5.9347	5.9694	5.556	5.605	5.5082	5.763	5.7659	5.7621
pos_503	4'-O-Glucopyranosylsinapic acid	metab_2517	-	-	-	-	HMDB0303764	pos	-	-	-	-	Organic oxygen compounds	Organooxygen compounds	387.128	M+H-H2O, M+H	C17H22O10	3.9309	0.0155837	0	54.5	-2.016	-	Carbohydrates and carbohydrate conjugates	5.3033	5.5466	5.4624	5.2665	4.5667	5.1273	5.7075	5.6643	5.7921	5.4258	5.3996	5.0718	5.511	5.4975	5.5037
pos_509	Indole-3-acetaldehyde	metab_2522	-	map01100;map00380	Metabolic pathways;Tryptophan metabolism	C00637	HMDB0001190	pos	-	-	Metabolism;Metabolism	Global and overview maps;Amino acid metabolism	Organoheterocyclic compounds	Indoles and derivatives	160.076	M+H, M+NH4	C10H9NO	2.7554	0.00728523	54.6	0	-1.13668	2591-98-2	Indoles	6.1538	6.155	6.1772	6.2911	6.1465	6.2831	5.306	5.3268	5.5195	5.9396	6.1131	6.0896	6.0201	6.0239	6.0176
pos_589	Dihydro-2(3H)-thiophenone	metab_2610	-	-	-	-	HMDB0031253	pos	-	-	-	-	Organoheterocyclic compounds	Thiolanes	227.016	2M+Na	C4H6OS	0.8024	0.0440483	0	33.6	-4.63283	1003-10-7	Not Available	4.3721	4.0853	4.2864	4.8766	4.9752	5.1059	3.8658	3.6656	3.7203	4.7997	4.6904	4.8803	4.4921	4.4935	4.4593
pos_597	(2R,3R,4S,5R)-2-(5,6-Dichlorobenzimidazol-1-yl)-5-(hydroxymethyl)oxolane-3,4-diol	metab_2619	-	-	-	-	HMDB0242505	pos	-	-	-	-	Nucleosides, nucleotides, and analogues	Benzimidazole ribonucleosides and ribonucleotides	301.016	M+H-H2O	C12H12Cl2N2O4	0.8182	0.0288555	0	53.5	6.85427	-	Not Available	4.615	4.4945	4.8039	5.1556	5.2703	5.3666	4.1924	4.067	3.8931	5.024	4.9965	5.1781	4.8576	4.8385	4.8343
pos_610	2-(2-Cyclopropylhydrazinyl)-9-[(2R,5R)-3,4-dihydroxy-5-(hydroxymethyl)oxolan-2-yl]-1H-purin-6-one	metab_2635	-	-	-	-	HMDB0255354	pos	-	-	-	-	Nucleosides, nucleotides, and analogues	Purine nucleosides	192.055	M+2Na	C13H18N6O5	0.8501	0.0332671	0	35.3	-6.47953	-	Not Available	4.8525	5.0356	4.9293	5.2839	5.3625	5.2208	4.9163	4.8714	4.7389	5.1858	5.2029	5.2273	5.0791	5.0553	5.0818
pos_615	Diflunisal glucuronide ester	metab_2640	-	-	-	-	HMDB0251263	pos	-	-	-	-	Organic oxygen compounds	Organooxygen compounds	465.04	M+K	C19H16F2O9	0.8501	0.020617	0	75.3	1.17227	-	Carbohydrates and carbohydrate conjugates	5.2614	5.2467	5.4208	5.401	5.4212	5.3008	5.0329	5.0345	5.0115	5.298	5.2988	5.3338	5.2478	5.2493	5.233
pos_63	3-hydroxytridecanoyl carnitine	metab_2655	-	-	-	-	HMDB0061639	pos	-	-	-	-	Lipids and lipid-like molecules	Fatty Acyls	396.271	M+H-2H2O, M+H-H2O, M+Na	C20H39NO5	6.0438	0.0199342	0	36.7	-2.2666	-	Fatty acid esters	5.971	5.7109	6.0671	5.76	5.6878	5.7016	5.3122	5.2315	5.6061	5.0142	4.981	4.951	5.6542	5.655	5.6396
pos_644	Phosphate	metab_2669	-	map00195;map02010;map00190	Photosynthesis;ABC transporters;Oxidative phosphorylation	C00009	HMDB0001429;PW_C001104	pos	-	-	Metabolism;Environmental Information Processing;Metabolism	Energy metabolism;Membrane transport;Energy metabolism	Homogeneous non-metal compounds	Non-metal oxoanionic compounds	98.9845	M+H	H3O4P	0.9448	0.0156391	51.4	0	3.28543	14265-44-2;7664-38-2	Non-metal phosphates	6.0906	5.9597	6.1925	6.3869	6.4168	6.5886	5.9061	5.8638	5.9374	6.4393	6.4299	6.507	6.2039	6.2172	6.2132
pos_681	Adenosine 3'-monophosphate	metab_2708	-	map01100;map00230	Metabolic pathways;Purine metabolism	C01367	HMDB0003540	pos	-	-	Metabolism;Metabolism	Global and overview maps;Nucleotide metabolism	Nucleosides, nucleotides, and analogues	Ribonucleoside 3''-phosphates	348.07	M+H	C10H14N5O7P	1.285	0.0134407	90	0	-2.05533	84-21-9	Not Available	4.571	4.5109	4.4524	5.3598	5.5267	5.4947	4.1088	3.9563	4.2354	5.1601	5.4646	5.0977	5.0012	4.9936	4.9898
pos_695	6-Methylthiopurine ribonucleoside	metab_2723	-	-	-	-	HMDB0247092	pos	-	-	-	-	Nucleosides, nucleotides, and analogues	Purine nucleotides	212.007	M+2Na	C11H15N4O7PS	1.4756	0.00824393	0	35.5	-9.17677	-	Purine ribonucleotides	4.3257	4.6508	4.4569	5.4354	5.4305	5.3273	3.8824	3.5894	3.6441	4.9855	4.9015	5.1813	4.7042	4.7013	4.7084
pos_705	Perseitol Heptaacetate	metab_2735	-	-	-	-	-	pos	-	-	-	-	-	-	524.196	M+NH4	C21H30O14	1.7069	0.00635132	41.4	0	-1.76818	-	-	6.0977	6.2805	6.1663	5.888	5.4311	5.5093	6.3772	6.2665	6.4396	5.8518	5.9289	5.7143	6.113	6.1145	6.1183
pos_71	Gentiopicrin	metab_2740	-	map01110;map00902	Biosynthesis of secondary metabolites;Monoterpenoid biosynthesis	C09782	HMDB0252696;LMPR0102070009;MJDBOTE0000930	pos	-	-	Metabolism;Metabolism	Global and overview maps;Metabolism of terpenoids and polyketides	Organic oxygen compounds	Organooxygen compounds	339.107	M+H-H2O, M+H, M+H-2H2O	C16H20O9	3.9707	0.00549101	49.4	0	-1.94381	20831-76-9	Carbohydrates and carbohydrate conjugates	6.0392	6.2611	6.2713	6.015	5.5084	5.7433	6.5914	6.4991	6.5784	6.1807	6.3085	6.0439	6.2837	6.2832	6.2794
pos_710	Maysin 3'-methyl ether	metab_2741	-	-	-	-	HMDB0037420	pos	-	-	-	-	Phenylpropanoids and polyketides	Flavonoids	307.083	M+H+Na	C28H30O14	1.7149	0.00639888	0	50.5	8.8447	74158-05-7	Flavonoid glycosides	5.3299	5.1973	5.3723	6.4433	6.4761	6.5112	3.9058	4.7302	4.9556	6.4143	6.5565	6.1838	6.0141	6.0153	6.01
pos_712	(S)-Norfenfluramine	metab_2743	-	-	-	-	HMDB0243739	pos	-	-	-	-	Benzenoids	Benzene and substituted derivatives	470.197	2M+ACN+Na	C10H12F3N	1.7308	0.00231328	0	58.2	-7.24356	-	Phenethylamines	5.0605	5.3709	4.7888	4.8254	4.3826	4.6161	5.8181	5.9205	5.8058	5.4464	5.2723	4.8222	5.4442	5.4427	5.4446
pos_715	2-(Malonylamino)benzoic acid	metab_2746	-	-	-	C03147	HMDB0039495	pos	-	-	-	-	Benzenoids	Benzene and substituted derivatives	224.055	M+H	C10H9NO5	1.7548	0.019467	0	43.9	-1.77654	53947-84-5	Benzoic acids and derivatives	4.5385	4.3544	4.5106	4.7522	4.7873	4.9738	4.3691	4.2304	3.9293	4.7479	4.5786	4.8703	4.5239	4.5402	4.5363
pos_728	2-Hydroxyterephthalic acid	metab_2760	-	-	-	-	HMDB0033137;HMDB0245171	pos	-	-	-	-	Organic oxygen compounds	Organooxygen compounds	224.055	M+ACN+H	C8H6O5	2.1639	0.0216737	0	42.2	-2.12825	10019-60-0	Carbohydrates and carbohydrate conjugates	5.2303	5.0411	5.238	5.4599	5.5102	5.7096	4.9818	4.9314	4.7469	5.422	5.3016	5.5456	5.2365	5.2545	5.2506
pos_729	Roxifiban	metab_2761	-	-	-	-	HMDB0257318	pos	-	-	-	-	Organic acids and derivatives	Carboxylic acids and derivatives	470.197	M+Na	C21H29N5O6	2.1719	0.0107214	0	61.8	-8.5885	-	Amino acids, peptides, and analogues	5.3527	5.6331	5.1062	4.8482	3.2855	4.3641	5.9689	6.0895	5.9454	5.3792	5.3141	4.3924	5.6067	5.616	5.6122
pos_744	Dhurrin 6'-glucoside	metab_2778	-	-	-	-	HMDB0029776	pos	-	-	-	-	Organic oxygen compounds	Organooxygen compounds	506.186	M+CH3OH+H	C20H27NO12	2.5159	0.0102989	0	35.8	-1.71639	-	Carbohydrates and carbohydrate conjugates	4.3322	5.0747	4.283	3.3873	3.3963	3.4014	6.1478	6.1284	6.0999	3.4058	3.533	3.3928	5.4901	5.4851	5.4812
pos_746	Blepharin	metab_2780	-	-	-	-	HMDB0029344	pos	-	-	-	-	Organic oxygen compounds	Organooxygen compounds	350.086	M+Na	C14H17NO8	2.5319	0.00242636	0	74.7	5.11524	27625-86-1	Carbohydrates and carbohydrate conjugates	4.7291	4.5737	4.679	4.4947	4.7173	4.5269	4.7821	5.0186	5.0885	4.6728	4.6723	4.6414	4.8169	4.8184	4.8189
pos_767	Artonin C	metab_2803	-	-	-	-	HMDB0035964	pos	-	-	-	-	Phenylpropanoids and polyketides	Diarylheptanoids	643.233	M+H-2H2O	C40H38O10	2.7155	0.0102436	0	42.9	1.09209	128553-97-9	Linear diarylheptanoids	5.8973	5.9459	5.9437	5.9543	5.9634	5.9685	6.4216	6.3063	6.4811	6.0772	6.0869	6.1	5.9592	5.9607	5.9524
pos_772	7-Deaza-2'-deoxyguanosine	metab_2809	-	-	-	-	HMDB0247243	pos	-	-	-	-	Organoheterocyclic compounds	Pyrrolopyrimidines	305.065	M+K	C11H14N4O4	2.7314	0.0312421	0	66.4	0.69117	-	Pyrrolo[2,3-d]pyrimidines	0.2691	4.0476	0.2911	5.4888	5.4761	5.5377	3.5148	3.3958	2.9882	4.8235	5.078	4.6781	4.7966	4.8187	4.7944
pos_779	Coniferaldehyde	metab_2816	-	map01100;map00940;map01110	Metabolic pathways;Phenylpropanoid biosynthesis;Biosynthesis of secondary metabolites	C02666	HMDB0141782	pos	-	-	Metabolism;Metabolism;Metabolism	Global and overview maps;Biosynthesis of other secondary metabolites;Global and overview maps	Benzenoids	Phenols	179.07	M+H	C10H10O3	2.7554	0.0101086	0	55.4	-1.39453	458-36-6;20649-42-7	Methoxyphenols	5.366	5.605	5.3211	4.3648	3.9347	4.2074	6.0953	6.0118	5.9953	4.386	4.6904	4.3569	5.6965	5.6916	5.6878
pos_783	Eleclazine	metab_2821	-	-	-	-	HMDB0251742	pos	-	-	-	-	Organoheterocyclic compounds	Benzoxazepines	448.144	M+CH3OH+H	C21H16F3N3O3	2.7554	0.0143536	0	47.1	-8.99384	-	Not Available	6.0358	6.1958	6.1095	5.9542	5.791	5.6042	6.2232	6.3604	6.5226	6.0219	5.9622	5.9429	6.1434	6.1528	6.141
pos_811	Lac Dye	metab_2852	-	-	-	-	HMDB0253936;HMDB0257108	pos	-	-	-	-	Organic oxygen compounds	Organooxygen compounds	610.197	M+2Na-H	C26H35N3O11	2.8427	0.0299896	0	66.1	-2.98736	-	Carbohydrates and carbohydrate conjugates	5.6126	5.7456	5.5546	5.4634	5.1343	4.9339	5.4586	5.4188	5.6859	5.1756	4.8881	5.1875	5.4909	5.4707	5.4668
pos_815	Fenvalerate	metab_2856	-	-	-	C10988	HMDB0031791	pos	-	-	-	-	Lipids and lipid-like molecules	Fatty Acyls	384.114	M+H-2H2O	C25H22ClNO3	2.8904	0.0302271	0	47.4	-1.8818	51630-58-1	Fatty acid esters	5.1259	4.9925	5.1662	5.6254	5.73	5.6983	4.5078	4.7114	4.5246	5.4935	5.5577	5.469	5.3038	5.2834	5.2796
pos_817	Galactaric acid	metab_2858	-	map01100;map00053	Metabolic pathways;Ascorbate and aldarate metabolism	C00879	LMFA01170107;HMDB0000639	pos	-	-	Metabolism;Metabolism	Global and overview maps;Carbohydrate metabolism	Organic oxygen compounds	Organooxygen compounds	252.072	M+ACN+H	C6H10O8	2.8984	0.0317918	0	36.4	3.90688	526-99-8	Carbohydrates and carbohydrate conjugates	4.5379	4.4776	4.6475	5.0468	5.1568	5.173	3.896	4.175	3.9048	4.9263	5.0109	4.9814	4.7484	4.7269	4.723
pos_818	(4As,5aS,6S,12aS)-1,6,10,11-tetrahydroxy-6-methyl-3,12-dioxo-4a,5,5a,12a-tetrahydro-4H-tetracene-2-carboxamide	metab_2859	-	-	-	-	HMDB0250378	pos	-	-	-	-	Phenylpropanoids and polyketides	Tetracyclines	430.091	M+2Na-H	C20H19NO7	2.8984	0.0296738	0	72.9	8.94564	-	Not Available	3.8075	4.1817	4.0319	5.125	5.3279	5.3427	3.8333	3.8103	3.865	5.1494	5.0764	4.8502	4.7123	4.7331	4.7098
pos_820	Folinic acid	metab_2862	-	map01100;map00670	Metabolic pathways;One carbon pool by folate	C03479	HMDB0001562;HMDB0247218	pos	-	-	Metabolism;Metabolism	Global and overview maps;Metabolism of cofactors and vitamins	Organoheterocyclic compounds	Pteridines and derivatives	474.172	M+H	C20H23N7O7	2.9383	0.00182417	0	69	-1.57659	58-05-9;68538-85-2	Pterins and derivatives	5.4851	5.4343	5.2899	5.9789	5.8369	5.8642	5.5503	5.6529	5.6566	6.2172	6.2083	6.1913	5.8254	5.8269	5.8264
pos_824	Xanthurenic Acid	metab_2866	-	map00380	Tryptophan metabolism	C02470	PW_C000703;HMDB0000881;MJDBOTE0001103	pos	-	-	Metabolism	Amino acid metabolism	Organoheterocyclic compounds	Quinolines and derivatives	188.034	M+H-H2O	C10H7NO4	2.9781	0.00265365	42.8	0	-2.14274	59-00-7	Quinoline carboxylic acids	5.4081	5.3901	5.4532	5.2333	5.1287	5.3462	5.4138	5.3834	5.6211	5.1928	5.1215	5.2087	5.348	5.3496	5.3503
pos_828	Polychrom	metab_2870	-	-	-	-	;MJDBOTE0001044	pos	-	-	-	-	-	-	305.065	M+H-2H2O	C15H16O9	2.9941	0.0166694	53.4	0	-1.86886	-	-	4.3621	3.8854	4.3182	5.0516	5.0345	4.9884	1.9183	1.8956	1.9497	4.2307	4.4811	4.0441	4.403	4.3929	4.389
pos_829	4-(2-Aminophenyl)-2,4-dioxobutanoic acid	metab_2871	-	map01100;map00380	Metabolic pathways;Tryptophan metabolism	C01252	PW_C000778;HMDB0000978	pos	-	-	Metabolism;Metabolism	Global and overview maps;Amino acid metabolism	Organic oxygen compounds	Organooxygen compounds	208.06	M+H	C10H9NO4	3.0019	0.00447132	0	56.7	-1.59929	90924-76-8	Carbonyl compounds	5.2945	4.942	5.216	5.2749	5.4578	5.7921	4.6053	4.6582	4.7791	5.1289	5.1819	5.2375	5.1612	5.1636	5.1598
pos_83	Zingiberol	metab_2872	-	-	-	-	HMDB0303118	pos	-	-	-	-	Organic oxygen compounds	Organooxygen compounds	254.247	M+H, M+NH4, M+H-H2O	C16H28O	6.6781	0.00309343	0	46	-2.03976	-	Alcohols and polyols	6.3401	6.3299	6.4866	6.7182	6.6176	6.6608	6.3451	6.3746	6.4147	6.6011	6.677	6.6847	6.4962	6.4938	6.4939
pos_84	(E)-5,8-Megastigmadien-4-one	metab_2883	-	-	-	-	HMDB0034671	pos	-	-	-	-	Organic oxygen compounds	Organooxygen compounds	210.185	M+H-H2O, M+H, M+NH4	C13H20O	6.7337	0.0381966	0	56.1	-1.59538	67401-26-7	Carbonyl compounds	5.0816	5.1003	5.256	5.4766	5.3577	5.4422	4.9793	5.031	5.0761	5.399	5.448	5.526	5.2441	5.2456	5.2733
pos_845	Piperonyl acetate	metab_2889	-	-	-	-	HMDB0032614	pos	-	-	-	-	Organoheterocyclic compounds	Benzodioxoles	212.091	M+NH4	C10H10O4	3.1293	0.0148321	0	80.5	-1.67906	326-61-4	Not Available	3.8622	3.6478	4.436	4.1253	4.1974	4.0012	2.9851	2.9326	3.7372	4.159	3.8804	4.1065	4.012	4.0129	4.0236
pos_853	6-[(2S,3S,4R,5R)-5-(6-Aminopurin-9-yl)-3,4-dihydroxyoxolan-2-yl]oxane-2,5-dione	metab_2898	-	-	-	-	HMDB0257755	pos	-	-	-	-	Nucleosides, nucleotides, and analogues	Purine nucleosides	737.17	2M+K	C14H15N5O6	3.1771	0.00617603	0	49.7	2.88281	-	Not Available	7.2812	7.2648	7.0269	6.5843	6.5733	6.4902	6.4855	6.9873	6.8268	5.6307	6.0046	5.7564	6.9184	6.9137	6.9138
pos_882	Quercetin 7-glucoside	metab_2929	-	-	-	C12639	HMDB0302151	pos	-	-	-	-	Phenylpropanoids and polyketides	Flavonoids	487.084	M+Na	C21H20O12	3.3355	0.178445	0	79	-2.01374	-	Flavonoid glycosides	3.8551	4.2822	4.2778	5.6438	5.709	5.6216	3.8809	4.0672	3.9127	5.0657	5.6422	5.2915	4.677	4.5331	4.6748
pos_890	Fenfluramine	metab_2936	-	-	-	C06996	HMDB0252200	pos	-	-	-	-	Benzenoids	Benzene and substituted derivatives	264.159	M+CH3OH+H	C12H16F3N	3.383	0.0148814	0	51.6	8.5257	458-24-2	Phenethylamines	5.2069	5.2555	5.2533	5.2639	5.273	5.2781	5.6824	5.7074	5.7937	5.3004	5.4309	5.3793	5.2723	5.2739	5.2619
pos_891	Homovanillin	metab_2937	-	map01100;map00350	Metabolic pathways;Tyrosine metabolism	C05581	HMDB0005175;PW_C002411	pos	-	-	Metabolism;Metabolism	Global and overview maps;Amino acid metabolism	Benzenoids	Phenols	149.06	M+H-H2O	C9H10O3	3.3986	0.0249195	0	37.9	-1.00342	5703-24-2	Methoxyphenols	4.1299	4.5312	4.9973	4.5349	3.6249	4.4457	4.2326	4.0469	4.2697	3.4721	3.6051	3.4275	4.4034	4.387	4.3831
pos_896	Helenalin	metab_2942	-	-	-	C09473	HMDB0253066	pos	-	-	-	-	Lipids and lipid-like molecules	Prenol lipids	280.154	M+NH4	C15H18O4	3.4383	0.0237894	0	37.5	-2.11416	6754-13-8	Terpene lactones	4.8493	4.8437	4.7181	4.9189	4.5835	4.7026	3.45	3.4271	3.4818	4.2991	4.2922	4.4749	4.5683	4.5702	4.5513
pos_899	4-Hydroxy-benzenepropanedioate	metab_2945	-	-	-	-	HMDB0059809	pos	-	-	-	-	Benzenoids	Phenol esters	197.044	M+H	C9H8O5	3.4621	0.0449325	0	43.5	-1.65329	-	Not Available	5.0657	5.0941	5.1247	0.8484	0.8562	3.2961	5.2492	5.4653	5.1677	0.8644	0.8555	0.8532	4.9687	4.9703	4.9353
pos_900	Artemorin	metab_2948	-	-	-	C09345	HMDB0302701	pos	-	-	-	-	Lipids and lipid-like molecules	Prenol lipids	266.175	M+NH4	C15H20O3	3.4621	0.0359051	0	32.8	-2.24847	64845-92-7	Terpene lactones	4.6149	4.6635	4.6613	4.6719	4.681	4.6861	5.2225	5.2197	5.2066	4.8016	4.9905	4.8426	4.6965	4.698	4.67
pos_902	3-deoxy-D-arabino-heptulosonate-7-phosphate	metab_2950	-	map01100;map00400;map01110;map01230	Metabolic pathways;Phenylalanine, tyrosine and tryptophan biosynthesis;Biosynthesis of secondary metabolites;Biosynthesis of amino acids	C04691	HMDB0304124	pos	-	-	Metabolism;Metabolism;Metabolism;Metabolism	Global and overview maps;Amino acid metabolism;Global and overview maps;Global and overview maps	Organic oxygen compounds	Organooxygen compounds	289.034	M+H	C7H13O10P	3.4858	0.199357	0	79.1	6.34752	-	Carbohydrates and carbohydrate conjugates	3.7163	3.765	3.7627	4.0316	4.3139	4.2924	3.7422	3.7192	3.7739	4.5377	5.0144	4.5243	3.9262	3.9374	3.7714
pos_910	Paromomycin I	metab_2959	-	map01110;map00524	Biosynthesis of secondary metabolites;Neomycin, kanamycin and gentamicin biosynthesis	C00832	HMDB0242512;HMDB0015490	pos	-	-	Metabolism;Metabolism	Global and overview maps;Biosynthesis of other secondary metabolites	Organic oxygen compounds	Organooxygen compounds	654.265	M+K	C23H45N5O14	3.573	0.0542668	0	56.7	9.72607	1263-89-4;7542-37-2	Carbohydrates and carbohydrate conjugates	5.2476	4.3083	5.2989	5.2419	5.297	5.4068	4.9566	5.2542	5.0552	4.7691	4.8633	4.5388	5.1455	5.1086	5.1026
pos_915	Ribavirin 5'-triphosphate	metab_2964	-	-	-	-	HMDB0257207	pos	-	-	-	-	Nucleosides, nucleotides, and analogues	Triazole ribonucleosides and ribonucleotides	502.018	M+NH4	C8H15N4O14P3	3.6844	0.00592634	0	54.6	9.50166	-	Not Available	5.5918	5.6324	5.6315	5.5625	5.5538	5.489	5.6334	5.6994	5.4118	4.6862	4.886	4.689	5.6943	5.6892	5.6919
pos_938	Diosmetin-7-O-Rutinoside	metab_2988	-	-	-	C10039	HMDB0029548;MJDBOTE0001469	pos	-	-	-	-	Phenylpropanoids and polyketides	Flavonoids	609.18	M+H	C28H32O15	4.0106	0.0154511	83.7	0	-1.84529	520-27-4	Flavonoid glycosides	6.7982	6.5768	6.7758	6.3976	6.352	6.3763	5.388	5.6832	5.8711	4.5749	5.0596	4.245	6.4036	6.3944	6.3905
pos_941	Elemicin	metab_2992	-	-	-	C10451	HMDB0033778	pos	-	-	-	-	Benzenoids	Phenol ethers	209.117	M+H	C12H16O3	4.0343	0.0630611	0	61.6	-1.66604	487-11-6	Anisoles	3.3364	4.281	3.8432	3.4298	3.4024	3.4615	4.3772	4.6038	4.5088	4.0758	4.327	4.114	4.1188	4.1666	4.1212
pos_951	L-Hypoglycin A	metab_3002	-	-	-	C08287	HMDB0029427	pos	-	-	-	-	Organic acids and derivatives	Carboxylic acids and derivatives	124.076	M+H-H2O	C7H11NO2	4.1298	0.0194184	0	36.5	-0.00980388	156-56-9	Amino acids, peptides, and analogues	2.6033	2.6644	2.6496	4.7091	4.7085	4.675	2.629	2.6061	2.6607	4.5689	4.5345	4.5166	4.1324	4.1338	4.1185
pos_953	Maysin	metab_3004	-	-	-	-	HMDB0037419;LMPK12110512	pos	-	-	-	-	Phenylpropanoids and polyketides	Flavonoids	621.123	M+2Na-H	C27H28O14	4.1537	0.015152	0	87.7	5.95474	70255-49-1	Flavonoid glycosides	5.8561	5.7522	5.8335	5.105	5.0266	5.029	5.8874	5.7537	5.6917	4.551	5.2004	4.3852	5.6067	5.5979	5.5939
pos_954	Estriol-16-Glucuronide	metab_3005	-	-	-	C05504	HMDB0006766	pos	-	-	-	-	Lipids and lipid-like molecules	Steroids and steroid derivatives	482.238	M+NH4	C24H32O9	4.1774	0.0257402	0	51.1	-1.72307	1852-50-2	Steroidal glycosides	5.2583	5.645	5.3304	3.688	3.6971	3.7022	5.8488	5.8779	5.7703	3.7066	3.8728	4.0823	5.4106	5.4122	5.3919
pos_955	Alternariol	metab_3006	-	-	-	C16838	HMDB0030831	pos	-	-	-	-	Phenylpropanoids and polyketides	Coumarins and derivatives	259.06	M+H	C14H10O5	4.2013	0.0261117	0	61.8	-1.68818	641-38-3	Not Available	4.9881	4.8822	4.9495	4.5651	4.5013	4.3714	4.1276	4.2669	4.7572	3.518	3.5076	3.505	4.6509	4.6336	4.6297
pos_956	Cichoriin	metab_3007	-	-	-	C09206	HMDB0030821	pos	-	-	-	-	Phenylpropanoids and polyketides	Coumarins and derivatives	305.065	M+H-2H2O	C15H16O9	4.2013	0.011566	0	60.9	-1.98281	531-58-8	Coumarin glycosides	6.5323	6.3872	6.458	6.3973	6.5024	6.3715	5.9074	6.0994	6.113	5.6165	5.8798	5.7007	6.2693	6.2632	6.2593
pos_959	Deoxycytidine	metab_3009	-	map00240;map01100;map02010;map01232	Pyrimidine metabolism;Metabolic pathways;ABC transporters;Nucleotide metabolism	C00881	HMDB0000014;PW_C000008;HMDB0250725	pos	Nucleic acids	Nucleosides	Metabolism;Metabolism;Environmental Information Processing;Metabolism	Nucleotide metabolism;Global and overview maps;Membrane transport;Global and overview maps	Nucleosides, nucleotides, and analogues	Pyrimidine nucleosides	496.217	2M+ACN+H	C9H13N3O4	4.2492	0.0336776	0	42.8	3.59658	951-77-9	Pyrimidine 2''-deoxyribonucleosides	4.1404	4.5333	3.833	3.8436	3.8527	3.8578	5.1226	5.0326	4.6691	3.8622	3.8518	3.8491	4.3931	4.3711	4.3658
pos_961	2-Hydroxyquinoline	metab_3012	-	-	-	C06338	-	pos	-	-	-	-	-	-	146.06	M+H	C9H7NO	4.2972	0.0960529	74.9	0	-1.13743	70254-42-1	-	4.1182	3.9639	4.0613	4.1775	4.2386	4.6626	3.6357	3.7291	3.4527	4.0533	3.9475	4.0796	4.0536	4.0552	3.9799
pos_964	Cytosine deoxyribonucleoside	metab_3015	-	map00240;map01100;map02010;map01232	Pyrimidine metabolism;Metabolic pathways;ABC transporters;Nucleotide metabolism	C00881	HMDB0000014;HMDB0250725	pos	Nucleic acids	Nucleosides	Metabolism;Metabolism;Environmental Information Processing;Metabolism	Nucleotide metabolism;Global and overview maps;Membrane transport;Global and overview maps	Nucleosides, nucleotides, and analogues	Pyrimidine nucleosides	210.088	M+H-H2O	C9H13N3O4	4.3289	0.0319506	0	81.6	4.4632	951-77-9	Pyrimidine 2''-deoxyribonucleosides	4.0612	3.9952	3.9256	4.8269	4.9526	4.8099	4.2463	4.0791	4.1885	5.0694	5.0862	5.1675	4.4112	4.4369	4.4335
pos_981	3-Phenylpropyl glucosinolate	metab_3032	-	-	-	-	HMDB0038422	pos	-	-	-	-	Organic oxygen compounds	Organooxygen compounds	438.084	M+H	C16H23NO9S2	4.6313	0.0168555	0	38.7	-9.74046	76265-25-3	Carbohydrates and carbohydrate conjugates	5.5263	5.8002	5.5842	4.7789	4.6364	4.5703	5.0072	5.1107	5.3116	4.5747	4.5643	4.5616	5.2741	5.2756	5.2622
pos_982	6''-O-Malonyldaidzin	metab_3033	-	map00943	Isoflavonoid biosynthesis	C16191	HMDB0041263	pos	-	-	Metabolism	Biosynthesis of other secondary metabolites	Phenylpropanoids and polyketides	Coumarins and derivatives	503.115	M+H	C24H22O12	4.6471	0.0181631	0	69.4	-6.80397	124590-31-4	Furanocoumarins	5.5456	5.4702	5.447	5.2255	5.2317	5.13	4.8111	4.9903	5.4372	3.7551	4.4971	4.0238	5.2971	5.3094	5.2948
pos_984	Loliolide	metab_3035	-	-	-	-	HMDB0302428	pos	-	-	-	-	Organoheterocyclic compounds	Benzofurans	197.117	M+H	C11H16O3	4.6711	0.0815541	73.4	0	-1.83961	-	Not Available	3.7065	4.0529	3.6099	3.1388	3.0435	3.6177	4.3696	4.4871	4.381	4.1157	4.1158	4.1081	4.1581	4.1587	4.0955
pos_993	3,5-Dicaffeoyl-4-succinoylquinic acid	metab_3045	-	-	-	-	HMDB0029903	pos	-	-	-	-	Organic acids and derivatives	Carboxylic acids and derivatives	599.138	M+H-H2O	C29H28O15	4.7586	0.0120597	0	73.2	-1.78167	179761-31-0	Pentacarboxylic acids and derivatives	5.7128	6.0305	5.6574	4.8183	4.875	4.9559	6.132	5.9195	6.167	4.9582	5.1102	5.0393	5.7954	5.7934	5.7855
pos_996	Riboflavin reduced	metab_3048	-	map01100;map00740	Metabolic pathways;Riboflavin metabolism	C01007	HMDB0001557	pos	-	-	Metabolism;Metabolism	Global and overview maps;Metabolism of cofactors and vitamins	Organoheterocyclic compounds	Pteridines and derivatives	313.091	M+H-2H2O	C15H16N4O6	4.7824	0.0341907	0	47.5	-6.00441	101652-10-2	Alloxazines and isoalloxazines	4.3997	4.4251	4.4482	3.3243	3.4537	3.8823	4.9397	4.81	5.0126	4.4865	4.5581	4.361	4.5695	4.5463	4.5423
pos_2387	3-O-Methylquercetin	metab_3054	-	map01110;map00944	Biosynthesis of secondary metabolites;Flavone and flavonol biosynthesis	C04443	HMDB0002655	pos	-	-	Metabolism;Metabolism	Global and overview maps;Biosynthesis of other secondary metabolites	Phenylpropanoids and polyketides	Flavonoids	317.065	M+H	C16H12O7	6.0676	0.0492473	65.9	0	-2.07875	480-19-3	Flavones	4.7988	4.694	4.7161	5.2234	5.0854	5.1514	4.4244	4.4492	4.4304	5.1174	5.1718	5.1959	4.8978	4.8633	4.8595
pos_3055	Aspartic Acid	metab_3056	-	map02010;map01240;map00270;map01200;map00999;map00250;map00410;map00770;map00470;map00710;map01100;map00220;map00300;map01210;map00340;map01230;map00260;map00261;map01110;map00760;map00460;map00970	ABC transporters;Biosynthesis of cofactors;Cysteine and methionine metabolism;Carbon metabolism;Biosynthesis of various plant secondary metabolites;Alanine, aspartate and glutamate metabolism;beta-Alanine metabolism;Pantothenate and CoA biosynthesis;D-Amino acid metabolism;Carbon fixation in photosynthetic organisms;Metabolic pathways;Arginine biosynthesis;Lysine biosynthesis;2-Oxocarboxylic acid…	C00049	HMDB0006483;HMDB0000191;MJDBOTE0000530	pos	Peptides;Hormones and transmitters	Amino acids;Neurotransmitters	Environmental Information Processing;Metabolism;Metabolism;Metabolism;Metabolism;Metabolism;Metabolism;Metabolism;Metabolism;Metabolism;Metabolism;Metabolism;Metabolism;Metabolism;Metabolism;Metabolism;Metabolism;Metabolism;Metabolism;Metabolism;Metabolism;Genetic Information Processing	Membrane transport;Global and overview maps;Amino acid metabolism;Global and overview maps;Biosynthesis of other secondary metabolites;Amino acid metabolism;Metabolism of other amino acids;Metabolism of cofactors and vitamins;Metabolism of other amino acids;Energy metabolism;Global and overview maps;Amino acid metabolism;Amino acid metabolism;Global and overview maps;Amino acid metabolism;Global …	Organic acids and derivatives	Carboxylic acids and derivatives	134.045	M+H	C4H7NO4	0.8422	0.00591742	81.7	0	-1.04431	1783-96-6;617-45-8;56-84-8	Amino acids, peptides, and analogues	5.9218	5.9159	5.9843	6.4607	6.4498	6.326	5.8413	5.8895	5.9665	6.3796	6.4107	6.3246	6.1157	6.1208	6.1181
pos_2571	Kaempferol	metab_3065	-	map01100;map00941;map01110;map00944	Metabolic pathways;Flavonoid biosynthesis;Biosynthesis of secondary metabolites;Flavone and flavonol biosynthesis	C05903	LMPK12110003;HMDB0032008;HMDB0005801;MJDBOTE0000798	pos	-	-	Metabolism;Metabolism;Metabolism;Metabolism	Global and overview maps;Biosynthesis of other secondary metabolites;Global and overview maps;Biosynthesis of other secondary metabolites	Phenylpropanoids and polyketides	Flavonoids	319.081	M+CH3OH+H	C15H10O6	4.3529	0.0147367	0	80.7	-2.35793	80714-53-0;520-18-3	Flavonoid glycosides	6.2988	6.0639	6.0792	6.1265	6.1682	6.1105	5.4943	5.6964	5.4026	5.0996	5.3573	5.0835	5.9378	5.9291	5.9253
pos_2754	Lampranthin II	metab_3067	-	map01110;map00944	Biosynthesis of secondary metabolites;Flavone and flavonol biosynthesis	C12634	HMDB0304696	pos	-	-	Metabolism;Metabolism	Global and overview maps;Biosynthesis of other secondary metabolites	Phenylpropanoids and polyketides	Flavonoids	611.159	M+H	C27H30O16	3.0177	0.0176878	0	93.3	-2.29686	32074-65-0	Flavonoid glycosides	6.1657	5.9931	5.9404	5.5271	5.4506	5.4838	5.2438	5.5602	5.1741	3.4822	4.3461	3.7162	5.6492	5.6383	5.6344
pos_504	Lawsone	metab_3068	-	-	-	C10368	HMDB0030773;HMDB0253997	pos	-	-	-	-	Benzenoids	Naphthalenes	207.065	M+H, M+CH3OH+H	C10H6O3	3.9309	0.00747809	0	50.6	-1.80296	481-39-0;83-72-7	Naphthoquinones	5.7172	5.8847	5.826	5.6437	5.2547	5.5403	6.0665	5.9793	6.1275	5.7021	5.7739	5.5675	5.8429	5.8444	5.8491
pos_2568	Penicillic Acid	metab_3071	-	-	-	C16804;C19495	HMDB0256217	pos	-	-	-	-	Organic acids and derivatives	Keto acids and derivatives	153.054	M+H-H2O	C8H10O4	4.3847	0.026924	44.7	0	-1.19729	90-65-3;17397-87-4	Medium-chain keto acids and derivatives	3.7235	3.8564	4.0747	4.5866	4.4954	4.5003	3.5671	3.7187	3.7452	4.642	4.5676	4.5628	4.1735	4.1759	4.1947
pos_980	Salicylic Acid	metab_3073	-	map01100;map00996;map01110;map04075	Metabolic pathways;Biosynthesis of various alkaloids;Biosynthesis of secondary metabolites;Plant hormone signal transduction	C00805	HMDB0001895;HMDB0000840;PW_C001263;HMDB0302214;MJDBZSJ0000117	pos	-	-	Metabolism;Metabolism;Metabolism;Environmental Information Processing	Global and overview maps;Biosynthesis of other secondary metabolites;Global and overview maps;Signal transduction	Benzenoids	Benzene and substituted derivatives	139.039	M+H	C7H6O3	4.5835	0.0105234	53.9	0	-1.35349	69-72-7;487-54-7	Benzoic acids and derivatives	4.6516	4.6142	4.6971	4.6449	4.6131	4.5926	4.6382	4.8001	4.6078	4.3903	4.4749	4.1984	4.5886	4.5833	4.5795
neg_1	Glucodistylin	metab_3076	-	-	-	-	HMDB0041597	neg	-	-	-	-	Phenylpropanoids and polyketides	Flavonoids	447.093	M-H2O-H, M-H, M+FA-H, M+Cl, 2M-H	C21H22O12	3.6924	0.000301657	69	0	-0.655791	27297-45-6	Flavonoid glycosides	8.8878	8.743	8.8077	8.483	8.5228	8.5069	8.5766	8.7312	8.3202	7.875	8.0861	7.9486	8.6704	8.6703	8.6705
neg_1017	2,8-Quinolinediol	metab_3097	-	-	-	C06342	HMDB0240311	neg	-	-	-	-	Organoheterocyclic compounds	Quinolines and derivatives	206.045	M+FA-H	C9H7NO2	3.0738	0.0172433	60	0	-4.05255	15450-76-7	Quinolones and derivatives	5.7146	5.5714	5.8266	5.7669	5.9073	6.2075	4.9767	5.0892	5.2609	5.5878	5.5725	5.673	5.6424	5.6553	5.6556
neg_1039	Licorice glycoside C1	metab_3121	-	-	-	-	LMPK12140030;HMDB0031995	neg	-	-	-	-	Phenylpropanoids and polyketides	Flavonoids	725.215	M-H	C36H38O16	3.126	0.00676102	0	64.9	8.65497	-	Flavonoid glycosides	4.5358	4.7866	4.7064	4.0811	4.1004	4.1445	5.3652	5.3528	5.3418	4.9399	4.9597	4.5841	5.0408	5.0356	5.0359
neg_1045	P-Coumaroyl vitisin A	metab_3128	-	-	-	-	HMDB0029239	neg	-	-	-	-	Phenylpropanoids and polyketides	Cinnamic acids and derivatives	752.161	M+FA-H	C35H31O16+	3.1398	0.0100642	0	46.9	2.41226	-	Hydroxycinnamic acids and derivatives	6.3006	6.2929	6.1407	5.8741	5.9368	5.9321	6.0311	6.3303	5.8072	3.6391	4.5637	3.907	6.0682	6.0606	6.0608
neg_1070	2,3,4-Trihydroxybenzoic acid	metab_3155	-	-	-	-	HMDB0059964	neg	-	-	-	-	Benzenoids	Benzene and substituted derivatives	151.003	M-H2O-H	C7H6O5	3.1966	0.0122015	0	36.7	-5.07808	610-02-6	Benzoic acids and derivatives	4.3541	4.2002	4.261	4.9122	4.9935	5.056	4.1265	4.3145	3.9628	5.08	5.1158	5.0902	4.6946	4.6956	4.7042
neg_1074	1,4-Bisdesoxycyadox	metab_3159	-	-	-	-	HMDB0244200	neg	-	-	-	-	Organoheterocyclic compounds	Diazanaphthalenes	238.072	M-H	C12H9N5O	3.2029	0.0222708	0	51.3	-7.25731	-	Benzodiazines	4.165	4.01	4.7579	4.2387	4.4149	4.5107	2.9983	2.9491	3.1935	3.8508	4.1559	4.0209	4.1333	4.1371	4.1515
neg_1084	4-Methylumbelliferone glucuronide	metab_3170	-	-	-	C11584	HMDB0240464	neg	-	-	-	-	Phenylpropanoids and polyketides	Coumarins and derivatives	397.077	M+FA-H	C16H16O9	3.234	0.0256078	0	51.8	-1.74614	6160-80-1	Coumarin glycosides	4.2695	4.2287	4.3465	5.2873	5.3411	5.2985	4.2197	3.9634	4.2386	5.4706	5.7941	5.3551	4.9916	4.9803	5.0026
neg_1096	Chlorogenic acid	metab_3183	-	map00940;map00941;map01110;map00945	Phenylpropanoid biosynthesis;Flavonoid biosynthesis;Biosynthesis of secondary metabolites;Stilbenoid, diarylheptanoid and gingerol biosynthesis	C00852	HMDB0040690;HMDB0003164	neg	-	-	Metabolism;Metabolism;Metabolism;Metabolism	Biosynthesis of other secondary metabolites;Biosynthesis of other secondary metabolites;Global and overview maps;Biosynthesis of other secondary metabolites	Organic oxygen compounds	Organooxygen compounds	353.088	M-H	C16H18O9	3.2702	0.0202637	0	75.5	-0.642249	202650-88-2;327-97-9;202650-88-2	Alcohols and polyols	4.0693	4.2535	4.1977	5.1882	5.3751	5.042	3.5713	3.8925	4.1474	4.9557	5.5797	5.1677	4.7206	4.7369	4.7231
neg_1136	1-[[(2S,3S,4S,5R)-3,4-Dihydroxy-5-(hydroxymethyl)-2-[(2R,3R,4S,5S,6R)-3,4,5-trihydroxy-6-(hydroxymethyl)oxan-2-yl]oxyoxolan-2-yl]methoxy]propan-2-one	metab_3227	-	-	-	-	HMDB0260242	neg	-	-	-	-	Organic oxygen compounds	Organooxygen compounds	435.093	M+K-2H	C15H26O12	3.3607	0.0272667	0	53.8	5.54096	-	Carbohydrates and carbohydrate conjugates	5.3221	5.137	5.2136	3.8759	4.1886	4.3357	5.4268	5.5346	5.2478	3.7854	3.6255	3.2332	5.1241	5.142	5.1199
neg_1138	7-Hydroxy-3-methoxy-1-primeverosyloxyxanthone	metab_3229	-	-	-	-	HMDB0033770	neg	-	-	-	-	Organoheterocyclic compounds	Benzopyrans	597.147	M+FA-H	C25H28O14	3.3666	0.0255889	0	85.5	0.777122	85754-76-3	1-benzopyrans	5.0735	5.2084	5.2391	4.5568	4.2904	4.2148	4.5682	4.7525	4.9195	3.8054	3.7799	3.8329	4.8683	4.8702	4.8499
neg_1140	Lucuminic acid	metab_3232	-	-	-	-	HMDB0035007	neg	-	-	-	-	Organic oxygen compounds	Organooxygen compounds	491.14	M+FA-H	C19H26O12	3.381	0.00613939	0	49.8	-0.313785	190323-48-9	Carbohydrates and carbohydrate conjugates	5.6889	5.5284	5.5805	5.2128	5.3161	5.5489	5.2508	5.3252	5.4643	5.0849	4.9056	4.8068	5.4211	5.4249	5.4198
neg_1149	Icariside D1	metab_3241	-	-	-	-	HMDB0303758	neg	-	-	-	-	Organic oxygen compounds	Organooxygen compounds	451.136	M+Cl	C19H28O10	3.4083	0.000793628	0	33.4	-4.30838	-	Carbohydrates and carbohydrate conjugates	2.8014	2.8071	2.8341	2.891	2.9103	3.2761	5.2874	5.2348	5.3961	6.0392	6.0228	6.1839	5.3442	5.3439	5.3435
neg_1156	Geniposide	metab_3249	-	-	-	C09781	HMDB0252679;MJDBOTE0000901	neg	-	-	-	-	Lipids and lipid-like molecules	Prenol lipids	387.129	M-H	C17H24O10	3.4282	0.0475018	45.1	0	-0.725823	24512-63-8	Terpene glycosides	4.9413	4.2561	5.0731	5.2577	5.3361	5.392	3.0962	3.2385	3.2221	3.9263	4.39	4.1709	4.7076	4.7441	4.7101
neg_1161	(R)-4A-(Ethoxymethyl)-1-(4-fluorophenyl)-6-((4-(trifluoromethyl)phenyl)sulfonyl)-4,4a,5,6,7,8-hexahydro-1H-pyrazolo[3,4-g]isoquinoline	metab_3255	-	-	-	-	HMDB0250459	neg	-	-	-	-	Organoheterocyclic compounds	Azoles	580.152	M+FA-H	C26H25F4N3O3S	3.4519	0.00780679	0	48.4	-2.4655	-	Pyrazoles	4.7214	4.8948	4.8847	5.401	4.7984	5.1852	5.2238	5.1539	5.0842	5.538	5.662	5.4433	5.2063	5.2014	5.1999
neg_1168	Violacein	metab_3262	-	map01100;map01110	Metabolic pathways;Biosynthesis of secondary metabolites	C21136	HMDB0259831	neg	-	-	Metabolism;Metabolism	Global and overview maps;Global and overview maps	Organoheterocyclic compounds	Indoles and derivatives	378.068	M+Cl	C20H13N3O3	3.484	0.0264098	0	60.3	7.2094	548-54-9	Hydroxyindoles	6.0504	6.3415	5.8838	6.3793	6.5185	6.5753	5.5822	5.76	5.9143	6.4233	6.2769	6.334	6.1798	6.1997	6.2
neg_1170	Occidentoside	metab_3265	-	-	-	-	HMDB0030574	neg	-	-	-	-	Lignans, neolignans and related compounds	Lignan glycosides	749.171	M+FA-H	C36H32O15	3.484	0.00842303	0	39.7	-1.41389	77782-91-3	Not Available	5.9909	6.0335	5.7745	5.3123	5.3558	5.3264	5.3955	5.6521	5.6205	3.9688	4.4708	3.9104	5.715	5.7153	5.7088
neg_1176	3-Hydroxybenzoic Acid	metab_3271	-	map00400	Phenylalanine, tyrosine and tryptophan biosynthesis	C00587	HMDB0002466	neg	-	-	Metabolism	Amino acid metabolism	Benzenoids	Benzene and substituted derivatives	137.023	M-H	C7H6O3	3.5108	0.0220667	59.1	0	-6.84704	1999-06-09	Benzoic acids and derivatives	5.1839	5.1585	5.1741	5.9408	5.9326	5.9611	5.3928	5.4427	5.3499	6.02	5.9874	6.1146	5.5478	5.5509	5.5657
neg_1191	3-(2-Glucosyloxy-4-methoxyphenyl)propanoic Acid	metab_3288	-	-	-	-	-	neg	-	-	-	-	-	-	357.119	M-H	C16H22O9	3.5616	0.0349064	30.4	0	-0.533866	-	-	4.8304	4.4492	4.8577	5.0052	5.0621	5.0312	3.7151	3.7868	3.9319	4.6607	4.8423	4.6595	4.6939	4.6958	4.7208
neg_1201	Esculetin	metab_3300	-	map01110;map00999	Biosynthesis of secondary metabolites;Biosynthesis of various plant secondary metabolites	C09263	HMDB0030819;MJDBOTE0000366	neg	-	-	Metabolism;Metabolism	Global and overview maps;Biosynthesis of other secondary metabolites	Phenylpropanoids and polyketides	Coumarins and derivatives	177.019	M-H	C9H6O4	3.6217	0.0616699	47	0	-4.57561	305-01-1	Hydroxycoumarins	2.7966	3.642	3.4651	4.4061	4.4745	4.4568	4.089	3.8635	3.991	4.7641	4.8692	4.895	4.216	4.2043	4.2548
neg_1213	Carthamone	metab_3313	-	-	-	C08598	HMDB0037377;LMPK12120410	neg	-	-	-	-	Phenylpropanoids and polyketides	Cinnamic acids and derivatives	493.099	M+FA-H	C21H20O11	3.6703	0.00248378	0	72.8	0.0739224	86579-00-2	Hydroxycinnamic acids and derivatives	6.677	6.5719	6.5887	6.285	6.3362	6.3114	6.4634	6.5835	6.1662	5.5977	5.8394	5.672	6.4922	6.4942	6.4925
neg_1214	Chlorfenethol	metab_3314	-	-	-	C19023	HMDB0250094	neg	-	-	-	-	Benzenoids	Benzene and substituted derivatives	577.051	2M+FA-H	C14H12Cl2O	3.6703	0.0296677	0	44.8	0.0811214	1980-06-08	Diphenylmethanes	5.2847	5.4654	5.4319	5.4242	5.4722	5.442	5.4891	5.5283	5.305	4.4843	4.9721	4.8183	5.5426	5.5203	5.5205
neg_1217	Plantaginin	metab_3317	-	-	-	C17056	-	neg	-	-	-	-	-	-	483.07	M+Cl	C21H20O11	3.6983	0.0068675	91.2	0	-0.257576	-	-	6.8154	6.7734	6.8116	6.6069	6.6531	6.6276	6.7034	6.7912	6.4705	5.989	6.2128	6.0432	6.7693	6.7714	6.7655
neg_1218	Delphinidin	metab_3318	-	map00942;map00941;map01110	Anthocyanin biosynthesis;Flavonoid biosynthesis;Biosynthesis of secondary metabolites	C05908	HMDB0003074;LMPK12010001	neg	-	-	Metabolism;Metabolism;Metabolism	Biosynthesis of other secondary metabolites;Biosynthesis of other secondary metabolites;Global and overview maps	Phenylpropanoids and polyketides	Flavonoids	284.032	M-H2O-H	C15H11O7+	3.7101	0.00473588	0	39.1	-1.63986	13270-61-6;528-53-0	Hydroxyflavonoids	6.8982	6.7583	6.8141	6.4465	6.4854	6.4756	6.5988	6.7551	6.3393	5.8224	6.0461	5.903	6.6865	6.6885	6.6906
neg_1225	Syringin	metab_3326	-	map00940	Phenylpropanoid biosynthesis	C01533	;MJDBOTE0001150	neg	-	-	Metabolism	Biosynthesis of other secondary metabolites	-	-	371.135	M-H	C17H24O9	3.7361	0.0189338	72.7	0	-0.669143	118-34-3	-	3.9732	3.7231	4.8906	4.675	4.6927	4.746	3.2143	3.1822	4.0001	4.6034	4.7929	4.6598	4.4392	4.4409	4.4541
neg_1229	Genistein 4'-O-glucuronide	metab_3330	-	-	-	-	HMDB0041737	neg	-	-	-	-	Phenylpropanoids and polyketides	Isoflavonoids	467.062	M+Na-2H	C21H18O11	3.7665	0.0122769	0	45.7	5.03652	-	Isoflavonoid O-glycosides	3.2966	3.3023	3.3293	5.8952	5.9713	5.949	3.2766	3.2445	3.2511	5.7902	5.9824	5.8539	5.2915	5.282	5.2825
neg_1231	Malvidin 3-rutinoside	metab_3333	-	-	-	-	LMPK12010376;HMDB0041595	neg	-	-	-	-	Phenylpropanoids and polyketides	Flavonoids	674.158	M+Cl	C29H35O16+	3.7734	0.00983434	0	61.1	-6.83922	39824-82-3	Flavonoid glycosides	5.8587	5.8565	6.122	5.97	5.9297	5.9577	4.8558	5.2818	5.2023	3.9622	4.5738	3.9917	5.7985	5.7911	5.7912
neg_1239	Lipoyl-GMP	metab_3341	-	-	-	-	HMDB0013617;PW_C008511	neg	-	-	-	-	Nucleosides, nucleotides, and analogues	Purine nucleotides	550.082	M-H	C18H26N5O9PS2	3.8304	0.0114873	0	40.7	-2.94509	-	Purine ribonucleotides	5.956	5.9644	5.9885	5.9936	6.0339	6.0376	5.9013	5.9968	5.6507	5.2596	5.562	5.3906	6.015	6.0174	6.0078
neg_1244	L-alpha-amino-epsilon-keto-pimelate	metab_3347	-	-	-	-	HMDB0304407	neg	-	-	-	-	Organic acids and derivatives	Carboxylic acids and derivatives	225.004	M+K-2H	C7H10NO5-	3.8441	0.079955	0	30.2	-4.909	-	Amino acids, peptides, and analogues	4.4541	4.4598	4.4868	5.0527	5.2598	5.1469	4.4341	4.402	4.4086	4.8947	5.3603	4.8774	4.5011	4.5628	4.5628
neg_1269	Pipecolic acid betaine	metab_3374	-	-	-	C08283	HMDB0304552;HMDB0033433;HMDB0304559	neg	-	-	-	-	Organic acids and derivatives	Carboxylic acids and derivatives	909.211	2M+FA-H	C21H20O10	3.9397	0.0578771	0	75.8	1.31088	472-22-0	Amino acids, peptides, and analogues	6.1425	5.6993	5.7861	3.6442	4.0904	3.7885	4.2157	4.9491	3.7665	3.1771	3.1516	3.2045	5.0569	5.0134	5.0585
neg_1270	Gentisate aldehyde	metab_3376	-	map01100;map00350	Metabolic pathways;Tyrosine metabolism	C05585	HMDB0004062	neg	-	-	Metabolism;Metabolism	Global and overview maps;Amino acid metabolism	Organic oxygen compounds	Organooxygen compounds	275.056	2M-H	C7H6O3	3.9476	0.00728082	0	35.5	-0.315057	1194-98-5	Carbonyl compounds	4.5317	5.0961	4.1014	5.7874	5.8605	5.8294	3.74	4.3052	4.0874	5.7478	5.8576	5.8328	5.397	5.399	5.4031
neg_1287	((2-Amino-3-((2-amino-3-((carboxymethyl)amino)-3-oxopropyl)dithio)propanoyl)amino)acetic acid	metab_3393	-	-	-	-	HMDB0242125	neg	-	-	-	-	Organic acids and derivatives	Carboxylic acids and derivatives	767.147	2M+Hac-H	C10H18N4O6S2	4.0188	0.0202738	0	47.6	-0.511147	-	Amino acids, peptides, and analogues	7.0654	6.9989	7.0207	6.5801	6.6744	6.5915	7.0748	6.9355	6.9005	6.3676	6.5903	6.4448	6.9028	6.8876	6.8877
neg_1290	Sucrose 1',4'-(4,4'-dihydroxy-3,3'-dimethoxy-b-truxinate)	metab_3397	-	-	-	-	HMDB0036978	neg	-	-	-	-	Phenylpropanoids and polyketides	Stilbenes	715.185	M+Na-2H	C32H38O17	4.0266	0.0387562	0	72.8	-0.283055	-	Stilbene glycosides	5.1603	5.2671	5.8136	5.5103	5.1382	4.858	5.6099	5.5004	5.4865	5.0187	5.2926	4.8283	5.4048	5.403	5.3744
neg_1293	Emodin	metab_3400	-	-	-	C10343	LMPK13040008;HMDB0035214;MJDBOTE0001470	neg	-	-	-	-	Benzenoids	Anthracenes	315.051	M+FA-H	C15H10O5	4.0423	0.0256637	0	66.7	-0.217965	518-82-1	Anthraquinones	5.5939	5.3239	5.4149	4.8188	4.909	4.9303	4.8317	5.044	4.6523	3.5146	3.3188	3.1559	5.1487	5.169	5.1511
neg_1295	N-Glycolylneuraminic acid	metab_3402	-	map00520	Amino sugar and nucleotide sugar metabolism	C03410	HMDB0000833;HMDB0242723;HMDB0062502	neg	Carbohydrates	Monosaccharides	Metabolism	Carbohydrate metabolism	Organic oxygen compounds	Organooxygen compounds	709.22	2M+Hac-H	C11H19NO10	4.0423	0.00854951	0	49.5	6.83638	1113-83-3	Carbohydrates and carbohydrate conjugates	4.74	4.9698	5.2481	4.9103	4.3772	4.3588	5.7128	5.7074	5.6339	5.1319	5.4674	5.0055	5.3269	5.3289	5.3217
neg_1329	Kaempferol-3-O-Arabinoside	metab_3439	-	-	-	-	-	neg	-	-	-	-	-	-	417.083	M-H	C20H18O10	4.1991	0.0124026	88.2	0	-0.174914	-	-	5.7443	5.3969	5.5319	4.662	4.6428	4.7036	5.2129	5.4572	4.7497	3.2961	3.7839	3.3235	5.3143	5.3164	5.3244
neg_1339	Myricetin	metab_3450	-	map00941;map01110;map00944	Flavonoid biosynthesis;Biosynthesis of secondary metabolites;Flavone and flavonol biosynthesis	C10107	HMDB0002755;LMPK12110001;MJDBOTE0000381	neg	-	-	Metabolism;Metabolism;Metabolism	Biosynthesis of other secondary metabolites;Global and overview maps;Biosynthesis of other secondary metabolites	Phenylpropanoids and polyketides	Flavonoids	317.03	M-H	C15H10O8	4.2424	0.00832325	0	52.3	-0.809182	529-44-2	Flavones	5.7997	5.8751	5.7049	5.7087	5.58	5.7476	5.875	5.9518	5.7464	5.2847	5.2155	5.2154	5.7076	5.7138	5.7141
neg_1340	Tiazuril	metab_3452	-	-	-	-	HMDB0031833	neg	-	-	-	-	Organosulfur compounds	Thioethers	380.026	M+Na-2H	C17H14ClN3O2S	4.2424	0.0166728	0	37	4.51871	35319-70-1	Aryl thioethers	5.0798	5.1933	4.9864	4.9258	4.6593	4.921	5.2301	5.2983	5.1083	4.2184	3.9128	4.2755	4.9972	5.0107	4.9995
neg_1350	8-Methylsulfinyloctyl glucosinolate	metab_3463	-	-	-	C17271	HMDB0301915	neg	-	-	-	-	Organic oxygen compounds	Organooxygen compounds	514.084	M+Na-2H	C16H31NO10S3	4.2965	0.0136919	0	37.4	-4.05386	-	Carbohydrates and carbohydrate conjugates	5.547	5.3358	5.3865	4.8432	4.8766	4.8688	5.5114	5.6411	5.6246	4.8563	5.1568	4.8642	5.321	5.3231	5.3118
neg_1351	(2-oxo-2,3-Dihydro-1H-Indol-3-yl)acetic Acid	metab_3464	-	-	-	-	-	neg	-	-	-	-	-	-	190.05	M-H	C10H9NO3	4.3103	0.0239068	44.6	0	-3.5762	-	-	4.351	3.9805	4.3064	4.4932	4.5818	5.0103	3.5689	3.659	3.914	4.2157	4.1195	4.2681	4.212	4.2318	4.2276
neg_1356	Astilbin	metab_3469	-	-	-	C17449	HMDB0033850;HMDB0242667;MJDBOTE0000979	neg	-	-	-	-	Phenylpropanoids and polyketides	Flavonoids	495.114	M+FA-H	C21H22O11	4.3398	0.00185634	0	70.2	-0.024247	29838-67-3	Flavonoid glycosides	6.7182	6.6433	6.6206	6.0156	6.2383	6.2676	6.6574	6.7748	6.2155	5.705	5.4724	5.5994	6.4835	6.482	6.4823
neg_1359	Acetyl-DL-Leucine	metab_3472	-	-	-	C02710	HMDB0011756	neg	-	-	-	-	Organic acids and derivatives	Carboxylic acids and derivatives	172.097	M-H	C8H15NO3	4.354	0.00441721	75	0	-4.55997	1188-21-2	Amino acids, peptides, and analogues	4.4067	4.5228	4.5717	4.6617	4.6713	4.7993	4.3669	4.3694	4.394	4.7338	4.6866	4.7983	4.5205	4.5243	4.5228
neg_1377	Benzyl 6-O-beta-D-apiofuranosyl-beta-D-glucoside	metab_3492	-	-	-	-	HMDB0303056	neg	-	-	-	-	Organic oxygen compounds	Organooxygen compounds	383.135	M-H2O-H	C18H26O10	4.4184	0.0120445	0	73.4	-0.278807	-	Carbohydrates and carbohydrate conjugates	5.1135	4.8131	5.1946	4.6332	4.63	4.7434	4.2239	4.1579	4.4295	3.4603	4.0439	3.4878	4.7498	4.7518	4.7597
neg_1389	Isochorismate	metab_3505	-	map01100;map00130;map01110;map01240	Metabolic pathways;Ubiquinone and other terpenoid-quinone biosynthesis;Biosynthesis of secondary metabolites;Biosynthesis of cofactors	C00885	HMDB0304395	neg	-	-	Metabolism;Metabolism;Metabolism;Metabolism	Global and overview maps;Metabolism of cofactors and vitamins;Global and overview maps;Global and overview maps	Organic acids and derivatives	Hydroxy acids and derivatives	451.088	2M-H	C10H10O6	4.4838	0.0215604	0	76.3	-0.282649	22642-82-6	Beta hydroxy acids and derivatives	4.4403	4.748	4.2236	3.8848	3.2301	3.3211	5.2592	5.3479	5.3904	4.8157	5.0078	4.6287	4.9159	4.9321	4.9324
neg_1395	Quinalizarin	metab_3511	-	-	-	-	HMDB0257032	neg	-	-	-	-	Benzenoids	Anthracenes	603.078	2M+Hac-H	C14H8O6	4.5287	0.0173938	0	65	0.793933	-	Anthraquinones	4.2853	4.5192	3.9331	6.1276	6.2016	6.1738	4.3312	4.6706	3.8904	5.9429	6.0659	6.0216	5.6149	5.617	5.6029
neg_1399	(6R)-5,10-Methylenetetrahydrofolate	metab_3515	-	map01100;map01200;map00670;map00260;map01240	Metabolic pathways;Carbon metabolism;One carbon pool by folate;Glycine, serine and threonine metabolism;Biosynthesis of cofactors	C00143	HMDB0001533;HMDB0243630	neg	-	-	Metabolism;Metabolism;Metabolism;Metabolism;Metabolism	Global and overview maps;Global and overview maps;Metabolism of cofactors and vitamins;Amino acid metabolism;Global and overview maps	Organoheterocyclic compounds	Pteridines and derivatives	492.136	M+Cl	C20H23N7O6	4.5405	0.0147563	0	42.2	-9.71178	3432-99-3;31690-11-6	Pterins and derivatives	5.6262	5.3672	5.6768	5.0476	4.9842	5.1566	4.5391	4.618	4.7626	3.8769	4.057	3.6649	5.1639	5.1759	5.1662
neg_1403	N-Acetyl-D-phenylalanine	metab_3521	-	map01100;map00470	Metabolic pathways;D-Amino acid metabolism	C05620	-	neg	-	-	Metabolism;Metabolism	Global and overview maps;Metabolism of other amino acids	-	-	206.082	M-H	C11H13NO3	4.5617	0.0324795	50	0	-2.89513	10172-89-1	-	4.3285	4.4733	4.4243	4.7982	4.8555	5.0593	4.0465	4.1143	4.1086	4.8006	4.7716	4.8684	4.5463	4.571	4.5709
neg_1412	Isovitexin 2''-O-glucoside	metab_3531	-	map00944	Flavone and flavonol biosynthesis	C04199	HMDB0302583;HMDB0029484;LMPK12110217	neg	-	-	Metabolism	Biosynthesis of other secondary metabolites	Phenylpropanoids and polyketides	Flavonoids	593.151	M-H	C27H30O15	4.5852	0.00550153	0	81.9	0.264637	60767-80-8	Flavonoid glycosides	5.6171	5.706	5.6802	5.4548	4.7768	5.1186	5.7468	5.6687	5.6918	5.2706	5.3637	5.4016	5.5876	5.5848	5.5828
neg_1415	Naphthalene-1,2,4-trione	metab_3534	-	-	-	-	HMDB0257698	neg	-	-	-	-	Benzenoids	Naphthalenes	219.029	M+FA-H	C10H6O3	4.599	0.0124433	0	39.1	-3.13644	-	Naphthoquinones	4.5851	4.664	4.5845	3.8708	4.0661	4.0306	5.2355	5.1916	4.7813	4.4722	4.3917	4.4533	4.7133	4.7157	4.7236
neg_1423	6-Heptenyl glucosinolate	metab_3543	-	-	-	-	HMDB0038425	neg	-	-	-	-	Organic oxygen compounds	Organooxygen compounds	436.071	M+Na-2H	C14H25NO9S2	4.6325	0.0149252	0	43.6	-2.81116	-	Carbohydrates and carbohydrate conjugates	5.4952	5.7606	5.5846	4.9546	4.8554	4.7846	5.0735	5.1841	5.2962	3.54	4.0188	3.8726	5.3272	5.3291	5.3392
neg_1436	Metsulfuron-methyl	metab_3557	-	-	-	C10946	HMDB0254690	neg	-	-	-	-	Benzenoids	Benzene and substituted derivatives	761.136	2M-H	C14H15N5O6S	4.6988	0.0415774	0	58.6	-6.34159	74223-64-6	Benzoic acids and derivatives	5.3416	5.4172	5.1384	4.0674	3.9664	4.4412	5.5278	5.6258	5.3904	3.9553	3.9033	4.0092	5.2607	5.2645	5.2311
neg_1447	Trans-Resveratrol	metab_3569	-	map01110;map00945	Biosynthesis of secondary metabolites;Stilbenoid, diarylheptanoid and gingerol biosynthesis	C03582	HMDB0041772;HMDB0003747;HMDB0034118	neg	-	-	Metabolism;Metabolism	Global and overview maps;Biosynthesis of other secondary metabolites	Phenylpropanoids and polyketides	Stilbenes	227.071	M-H	C14H12O3	4.7677	0.0215709	55.8	0	-1.93283	501-36-0;61434-67-1	Not Available	4.8147	4.4613	4.7639	4.5088	4.4024	4.5457	4.0332	4.3463	4.1712	3.2782	3.2527	3.5876	4.4741	4.4902	4.4906
neg_1448	Piceid	metab_3570	-	-	-	C10275	LMPK13090012;HMDB0030564;MJDBOTE0001487	neg	-	-	-	-	Phenylpropanoids and polyketides	Stilbenes	435.13	M+FA-H	C20H22O8	4.7677	0.00467038	77.2	0	-0.270049	27208-80-6	Stilbene glycosides	5.1575	4.8018	5.0694	4.7399	4.6983	4.8055	4.0664	4.6778	4.4102	3.7693	3.477	3.255	4.798	4.7972	4.7941
neg_1452	4-Vinylphenol	metab_3575	-	map00940;map01110	Phenylpropanoid biosynthesis;Biosynthesis of secondary metabolites	C05627	HMDB0004072	neg	-	-	Metabolism;Metabolism	Biosynthesis of other secondary metabolites;Global and overview maps	Benzenoids	Benzene and substituted derivatives	119.049	M-H	C8H8O	4.7864	0.0228867	39	0	-8.09099	2628-17-3	Styrenes	5.2824	5.2372	5.5485	5.6179	5.6094	5.7368	5.0936	5.0206	5.04	5.604	5.6342	5.7654	5.4183	5.4204	5.4364
neg_1455	Phenylpyruvic Acid	metab_3578	-	map01100;map01110;map01210;map00960;map00470;map01230;map00360;map00400	Metabolic pathways;Biosynthesis of secondary metabolites;2-Oxocarboxylic acid metabolism;Tropane, piperidine and pyridine alkaloid biosynthesis;D-Amino acid metabolism;Biosynthesis of amino acids;Phenylalanine metabolism;Phenylalanine, tyrosine and tryptophan biosynthesis	C00166	HMDB0000205;HMDB0304081;PW_C000131;MJDBOTE0000608	neg	-	-	Metabolism;Metabolism;Metabolism;Metabolism;Metabolism;Metabolism;Metabolism;Metabolism	Global and overview maps;Global and overview maps;Global and overview maps;Biosynthesis of other secondary metabolites;Metabolism of other amino acids;Global and overview maps;Amino acid metabolism;Amino acid metabolism	Benzenoids	Benzene and substituted derivatives	163.039	M-H	C9H8O3	4.7938	0.0116378	96	0	-5.14496	156-06-9	Phenylpyruvic acid derivatives	6.0403	5.9849	6.283	6.3915	6.398	6.498	5.8603	5.7826	5.8166	6.4128	6.4305	6.5443	6.1943	6.1963	6.2038
neg_1473	Paclobutrazol	metab_3598	-	-	-	C18479	HMDB0256072;MJDBZSJ0000118	neg	-	-	-	-	Benzenoids	Benzene and substituted derivatives	274.112	M-H2O-H	C15H20ClN3O	4.8668	0.0192649	0	32.1	0.542828	76738-62-0	Phenethylamines	3.8621	3.8678	3.8948	4.4834	4.9784	4.5636	3.8421	3.8099	3.8166	4.161	4.4113	4.3276	3.9091	3.9236	3.9237
neg_1480	Imipenem	metab_3606	-	-	-	C06665	HMDB0015536	neg	Antibiotics	beta-Lactams	-	-	Organoheterocyclic compounds	Lactams	643.188	2M+FA-H	C12H17N3O4S	4.8938	0.03101	0	45.4	3.88173	74431-23-5;64221-86-9	Beta lactams	5.2718	5.3773	5.327	3.9802	3.664	4.2989	5.0504	5.2328	5.161	3.9467	3.5497	3.7167	5.0776	5.0817	5.0564
neg_1482	Laricitrin	metab_3608	-	map01110;map00944	Biosynthesis of secondary metabolites;Flavone and flavonol biosynthesis	C12633	HMDB0126497;LMPK12112482	neg	-	-	Metabolism;Metabolism	Global and overview maps;Biosynthesis of other secondary metabolites	Phenylpropanoids and polyketides	Flavonoids	331.046	M-H	C16H12O8	4.9076	0.0203706	0	62.8	-0.481551	53472-37-0	Flavones	5.4863	5.5419	5.4223	5.1812	5.0995	5.2204	5.6616	5.6484	5.4878	4.8841	4.781	4.87	5.3827	5.398	5.3983
neg_1498	3-(3,4-Dihydroxyphenyl)prop-2-enoic Acid	metab_3625	-	-	-	-	;MJDBOTE0000794	neg	-	-	-	-	-	-	179.034	M-H	C9H8O4	5.0088	0.0181555	34.6	0	-4.23435	-	-	4.779	4.7833	4.8468	5.2593	5.1407	5.2387	4.8283	4.8372	4.9031	5.4263	5.4049	5.4655	5.0199	5.022	5.0344
neg_1513	Aromadendrin	metab_3643	-	map01100;map00941;map01110	Metabolic pathways;Flavonoid biosynthesis;Biosynthesis of secondary metabolites	C00974	HMDB0030847	neg	-	-	Metabolism;Metabolism;Metabolism	Global and overview maps;Biosynthesis of other secondary metabolites;Global and overview maps	Phenylpropanoids and polyketides	Flavonoids	333.061	M+FA-H	C15H12O6	5.0668	0.00462697	0	67.9	-0.499052	480-20-6	Flavans	5.8294	5.7225	5.8305	5.6361	5.6627	5.73	5.8924	5.8719	5.929	5.5516	5.6082	5.4948	5.7764	5.7784	5.7744
neg_1534	Nafenopin	metab_3666	-	-	-	C11371	HMDB0255421	neg	-	-	-	-	Benzenoids	Benzene and substituted derivatives	331.133	M+Na-2H	C20H22O3	5.1573	0.00742261	0	42.1	5.02144	3771-19-5	Phenoxyacetic acid derivatives	4.6747	4.6804	4.7074	5.0697	5.4556	5.4635	4.6547	4.6225	4.6292	5.1333	5.2294	5.0133	4.7217	4.7237	4.728
neg_1536	Bruceine D	metab_3668	-	-	-	C08752	HMDB0249404	neg	-	-	-	-	Lipids and lipid-like molecules	Prenol lipids	431.135	M+Na-2H	C20H26O9	5.1642	0.0285758	0	51.9	5.30413	21499-66-1	Terpene lactones	4.7232	4.7266	5.0323	3.9604	3.8953	3.581	4.4072	4.4447	4.7565	3.2267	3.4102	3.2542	4.633	4.6116	4.6118
neg_1545	2'-O-Methylisoliquiritigenin	metab_3678	-	-	-	C15531	HMDB0037319	neg	-	-	-	-	Phenylpropanoids and polyketides	Linear 1,3-diarylpropanoids	315.087	M+FA-H	C16H14O4	5.2027	0.0349415	0	51.9	-0.382905	112408-67-0	Cinnamylphenols	5.9165	5.7714	5.8125	5.5086	5.482	5.5503	5.0019	5.2923	5.0162	4.4842	4.6849	4.4155	5.5133	5.5398	5.5399
neg_1546	Triazophos	metab_3679	-	-	-	C18657	HMDB0259159	neg	-	-	-	-	Organoheterocyclic compounds	Azoles	348.036	M+Cl	C12H16N3O3PS	5.2027	0.0280517	0	40.7	4.48576	24017-47-8	Triazoles	5.1655	4.9605	5.1773	5.6893	5.5944	5.7746	4.3943	4.9453	4.3676	5.4931	5.392	5.4548	5.2493	5.2706	5.2707
neg_1547	Sipoglitazar	metab_3680	-	-	-	-	HMDB0258310	neg	-	-	-	-	Benzenoids	Phenol ethers	498.126	M+Cl	C25H25N3O4S	5.2027	0.0122909	0	44.6	-0.887128	-	Not Available	5.6883	5.5365	5.5514	5.1592	5.0671	5.2358	4.5888	4.9878	4.5572	3.6946	3.8502	3.7221	5.2185	5.2206	5.2286
neg_1548	Fisetin	metab_3681	-	-	-	C10041	LMPK12111566;MJDBOTE0001471	neg	-	-	-	-	-	-	285.04	M-H	C15H10O6	5.217	0.0222001	40.1	0	-0.613532	528-48-3	-	5.392	5.1823	5.3998	5.6802	5.6613	5.7679	4.898	5.1243	4.9701	5.4613	5.3916	5.4485	5.3597	5.3764	5.3767
neg_1549	D-Chicoric acid	metab_3682	-	-	-	C10437	HMDB0033938	neg	-	-	-	-	Organic acids and derivatives	Carboxylic acids and derivatives	455.062	M-H2O-H	C22H18O12	5.217	0.00825261	0	44.5	-0.0757195	52248-48-3	Tetracarboxylic acids and derivatives	5.1214	5.2128	4.8587	5.768	5.9774	5.7885	5.3955	5.317	5.1795	5.6627	6.0266	5.8227	5.5269	5.529	5.5339
neg_1552	7,8-Dihydroxycoumarin	metab_3686	-	-	-	C03093	;MJDBOTE0001054	neg	-	-	-	-	-	-	177.019	M-H	C9H6O4	5.2322	0.0148725	37.2	0	-4.43997	486-35-1	-	4.8192	5.4312	5.0556	5.4747	5.4405	5.4631	4.8819	4.814	5.2273	5.7076	5.6163	5.755	5.2939	5.2962	5.306
neg_1567	PYR-41	metab_3702	-	-	-	-	HMDB0256938	neg	-	-	-	-	Benzenoids	Benzene and substituted derivatives	406.041	M+Cl	C17H13N3O7	5.3206	0.0186774	0	38	-8.90639	-	Benzoic acids and derivatives	4.9712	5.097	4.7309	4.3078	4.3063	4.4633	4.7416	4.6669	4.6353	4.2839	4.2497	4.3709	4.7032	4.7172	4.7174
neg_1584	Purpurin	metab_3721	-	-	-	C10395	HMDB0256928;LMPK12140007;MJDBOTE0001715	neg	-	-	-	-	Benzenoids	Anthracenes	255.03	M-H	C14H8O5	5.4088	0.0298099	41.8	0	-1.05492	81-54-9	Anthraquinones	2.6652	2.6709	2.6979	5.6472	5.4997	5.4075	2.6453	2.6132	2.6199	4.6287	5.4513	4.685	4.0335	4.0563	4.056
neg_1588	Neohesperidose	metab_3725	-	-	-	C08244	HMDB0029523;HMDB0302540	neg	-	-	-	-	Organic oxygen compounds	Organooxygen compounds	363.072	M+K-2H	C12H22O10	5.4275	0.0103448	0	74.8	6.6703	17074-02-1	Carbohydrates and carbohydrate conjugates	4.9329	4.9807	4.9242	3.3977	3.4169	3.461	5.3332	5.3777	5.1215	4.0512	3.371	3.9675	4.9189	4.922	4.9277
neg_16	2-Pyrocatechuic Acid	metab_3738	-	map01110	Biosynthesis of secondary metabolites	C00196	HMDB0000397;MJDBOTE0000462	neg	-	-	Metabolism	Global and overview maps	Benzenoids	Benzene and substituted derivatives	153.018	M-H, M+Cl, 2M-H	C7H6O4	3.1398	0.0101972	90	0	-5.89124	303-38-8	Benzoic acids and derivatives	6.8304	6.8227	6.8448	7.5438	7.6423	7.6825	6.705	6.8517	6.5787	7.7032	7.8033	7.7436	7.2981	7.3057	7.3058
neg_1608	Valyltyrosine	metab_3748	-	-	-	-	HMDB0029139	neg	-	-	-	-	Organic acids and derivatives	Carboxylic acids and derivatives	559.276	2M-H	C14H20N2O4	5.5304	0.0138671	0	82.9	-2.11956	3061-91-4	Amino acids, peptides, and analogues	5.1053	5.5028	5.3235	5.1889	4.7984	4.8175	4.824	4.7168	4.7162	3.8103	4.1319	4.2778	5.0494	5.0387	5.0393
neg_1618	(-)-Wikstromol	metab_3759	-	-	-	C10725	HMDB0030598	neg	-	-	-	-	Lignans, neolignans and related compounds	Furanoid lignans	373.129	M-H	C20H22O7	5.5717	0.0136238	0	56.9	-0.585666	34444-37-6	Tetrahydrofuran lignans	4.833	4.8828	4.9157	4.0192	3.7905	3.992	4.75	4.9296	4.6717	3.9115	3.7244	3.1512	4.6838	4.6938	4.6834
neg_1619	7,11,12-Triacetoxycoumestan	metab_3760	-	-	-	-	HMDB0030560	neg	-	-	-	-	Phenylpropanoids and polyketides	Isoflavonoids	445.035	M+Cl	C21H14O9	5.586	0.0284175	0	48.6	3.43955	2074-56-8	Coumestans	5.0282	5.1134	5.2037	4.749	4.7804	4.8012	4.8049	4.7731	4.8713	4.3211	4.5205	4.2274	4.8596	4.881	4.8813
neg_1636	7-O-(2,6-Dideoxy-2-fluoro-alpha-L-talopyranosyl)adriamycinone-14-O-hemipimelate	metab_3779	-	-	-	-	HMDB0254387	neg	-	-	-	-	Phenylpropanoids and polyketides	Anthracyclines	685.199	M-H2O-H	C34H37FO15	5.6915	0.00827459	0	78.7	7.57294	-	Not Available	5.3577	5.3105	5.3034	5.6348	5.6306	5.6985	4.9488	5.203	5.2223	5.5493	5.6444	5.5593	5.4074	5.4064	5.4007
neg_1643	Kaempferol 3-(2''-acetylrhamnoside)	metab_3787	-	-	-	-	HMDB0039748;LMPK12111883	neg	-	-	-	-	Phenylpropanoids and polyketides	Flavonoids	519.114	M+FA-H	C23H22O11	5.7259	0.00695273	0	46.2	-0.270785	135618-15-4	Flavonoid glycosides	5.2886	5.0825	5.0402	4.7841	4.8163	4.8602	5.5132	5.4811	5.3817	5.1057	5.0245	5.1524	5.1808	5.1754	5.1758
neg_1645	Citreorosein	metab_3789	-	-	-	C17810	LMPK13040023;HMDB0034444	neg	-	-	-	-	Benzenoids	Anthracenes	617.094	2M+FA-H	C15H10O6	5.7337	0.00894318	0	72.7	-0.0285897	481-73-2	Anthraquinones	6.3549	6.5267	6.2148	6.0693	5.9476	6.131	6.4485	6.4368	6.298	5.8246	5.8492	5.6559	6.2294	6.2318	6.2241
neg_1657	Swertiajaponin	metab_3802	-	-	-	C10187	LMPK12111030;HMDB0030569	neg	-	-	-	-	Phenylpropanoids and polyketides	Flavonoids	483.093	M+Na-2H	C22H22O11	5.7848	0.0101356	0	74.4	5.00679	6980-25-2	Flavonoid glycosides	4.882	4.8901	4.5884	5.3697	5.5798	5.4279	5.0571	4.8225	4.8404	5.2234	5.4944	5.4504	5.0825	5.091	5.0847
neg_1662	Wedelolactone	metab_3808	-	-	-	C10541	HMDB0259891;LMPK12090046	neg	-	-	-	-	Phenylpropanoids and polyketides	Isoflavonoids	313.035	M-H	C16H10O7	5.8197	0.0108203	67.9	0	-0.239811	524-12-9	Coumestans	4.2708	4.3397	4.0634	6.7245	6.4513	6.4477	4.4878	4.3698	4.2301	5.5339	6.2033	5.6954	5.2647	5.2741	5.269
neg_1698	(2S,3S,4S,5R)-6-[4-(5,7-Dihydroxy-4-oxochromen-3-yl)phenoxy]-3,4,5-trihydroxyoxane-2-carboxylic acid	metab_3847	-	-	-	-	HMDB0257972	neg	-	-	-	-	Phenylpropanoids and polyketides	Isoflavonoids	467.062	M+Na-2H	C21H18O11	5.9494	0.00421929	0	62.2	5.1448	-	Isoflavonoid O-glycosides	6.2329	6.3983	6.0672	5.4794	5.632	5.5214	6.371	6.4686	6.2944	5.7272	5.7329	5.6832	6.1561	6.1548	6.1584
neg_1762	Isorhamnetin 3-(6''-malonylglucoside)	metab_3918	-	-	-	-	HMDB0038820;LMPK12110589	neg	-	-	-	-	Phenylpropanoids and polyketides	Flavonoids	601.063	M+K-2H	C25H24O15	6.0566	0.0067728	0	42.5	4.5915	86555-37-5	Flavonoid glycosides	6.8617	7.0954	6.688	6.2839	6.2403	6.0893	6.8112	6.9658	6.7834	6.1611	6.0618	5.8802	6.7068	6.7016	6.7017
neg_177	Orsellinic acid 2-O-beta-D-glucoside	metab_3926	-	-	-	-	HMDB0302998	neg	-	-	-	-	Organic oxygen compounds	Organooxygen compounds	329.087	M-H, M+Cl	C14H18O9	2.8082	0.0183624	0	56.5	-0.984756	-	Carbohydrates and carbohydrate conjugates	6.2643	6.3052	6.486	7.2202	7.3053	7.3179	6.2122	6.1579	6.1859	7.0429	7.1946	7.0766	6.7939	6.8031	6.8099
neg_1809	Theaflavic acid	metab_3970	-	-	-	-	HMDB0040609	neg	-	-	-	-	Phenylpropanoids and polyketides	Flavonoids	409.056	M-H2O-H	C21H16O10	6.1278	0.00412698	0	35.1	-0.421036	30407-93-3	Flavans	4.1516	4.6112	3.388	5.3198	5.35	5.4601	5.075	5.2129	4.7568	5.6887	5.7605	5.7122	5.2779	5.2746	5.2749
neg_1855	5-(3',4',5'-Trihydroxyphenyl)-gamma-valerolactone-O-methyl-O-sulphate	metab_4021	-	-	-	-	HMDB0060029	neg	-	-	-	-	Benzenoids	Phenols	355.009	M+Na-2H	C12H14O9S	6.2301	0.00931009	0	35.2	-3.20322	-	Benzenediols	4.4819	4.5135	4.5108	5.0445	5.1302	5.19	4.6796	4.47	4.4065	5.4949	5.7153	5.5947	5.0342	5.0287	5.0366
neg_1910	Glucoberteroin	metab_4082	-	map01210;map01110;map00966	2-Oxocarboxylic acid metabolism;Biosynthesis of secondary metabolites;Glucosinolate biosynthesis	C08401	HMDB0304679	neg	-	-	Metabolism;Metabolism;Metabolism	Global and overview maps;Global and overview maps;Biosynthesis of other secondary metabolites	Organic oxygen compounds	Organooxygen compounds	433.056	M-H	C13H24NO9S3-	6.3561	0.0319314	0	78.3	4.74046	29611-01-6	Carbohydrates and carbohydrate conjugates	5.0827	5.0118	4.8224	5.5142	5.8206	5.8215	5.2062	5.1545	5.1073	5.5207	5.6673	5.7222	5.274	5.299	5.2765
neg_1931	12-OPDA	metab_4103	-	map01100;map00592;map01110	Metabolic pathways;alpha-Linolenic acid metabolism;Biosynthesis of secondary metabolites	C01226	HMDB0301804	neg	-	-	Metabolism;Metabolism;Metabolism	Global and overview maps;Lipid metabolism;Global and overview maps	Lipids and lipid-like molecules	Fatty Acyls	291.196	M-H	C18H28O3	6.4188	0.0100175	59.4	0	-0.577724	85551-10-6	Eicosanoids	5.3326	5.1663	5.3997	4.802	4.7588	4.9631	4.9516	5.019	4.9815	4.5827	4.3036	4.542	5.0828	5.0751	5.0754
neg_195	Eugenin	metab_4123	-	-	-	C20210	HMDB0036627	neg	-	-	-	-	Organoheterocyclic compounds	Benzopyrans	457.114	M+Na-2H, 2M+FA-H	C11H10O4	5.3979	0.0445779	0	54.7	-0.163323	480-34-2	1-benzopyrans	5.1985	5.1001	5.039	5.0063	5.057	4.9621	5.365	5.3989	5.1882	4.8794	5.0212	4.9468	5.1235	5.1577	5.1258
neg_1951	3,17,20-Trihydroxypregnane	metab_4125	-	-	-	-	HMDB0256756	neg	-	-	-	-	Lipids and lipid-like molecules	Steroids and steroid derivatives	381.264	M+FA-H	C21H36O3	6.4737	0.0124893	0	45.8	-0.724198	-	Pregnane steroids	5.2051	5.2203	5.2533	4.8728	4.4066	4.1752	4.1948	4.3522	4.4421	3.6685	3.401	3.9808	4.8664	4.8684	4.8581
neg_201	Naringenin-7-O-glucoside	metab_4189	-	-	-	-	-	neg	-	-	-	-	-	-	433.114	M-H, M+FA-H	C21H22O10	5.6964	0.00569291	93.5	0	-0.531974	-	-	5.9892	5.8002	5.88	4.6023	4.4859	4.5006	5.8661	5.9325	5.822	4.3484	4.3553	4.2975	5.6872	5.6914	5.6916
neg_202	4-Oxododecanedioic acid	metab_4200	-	-	-	-	-	neg	-	-	-	-	-	-	243.123	M-H, M+Na-2H	C12H20O5	5.7549	0.0149844	54.4	0	-1.27541	-	-	5.4053	5.2444	5.7468	5.4007	5.6671	5.7469	4.764	4.9907	4.8767	5.4357	5.3352	5.2261	5.3421	5.3533	5.3536
neg_2021	3-(5,6,6-Trimethylbicyclo[2.2.1]hept-1-yl)cyclohexanol	metab_4202	-	-	-	-	HMDB0031851	neg	-	-	-	-	Lipids and lipid-like molecules	Prenol lipids	281.212	M+FA-H	C16H28O	6.6303	0.044649	0	39.1	-0.83811	3407-42-9	Monoterpenoids	4.1193	3.3868	4.7608	3.8554	4.1742	3.8736	3.2577	3.5237	3.2229	4.0575	3.9021	3.946	4.0237	3.99	3.991
neg_219	1-(1-Chloroethyl)-4-fluorobenzene	metab_4376	-	-	-	-	HMDB0243770	neg	-	-	-	-	Benzenoids	Benzene and substituted derivatives	315.051	2M-H, 3M-H	C8H8ClF	6.0645	0.00785765	0	32.5	-4.67436	-	Halobenzenes	5.8655	5.8198	5.7493	6.5939	6.511	6.5008	5.5271	5.5626	5.4676	6.2567	6.3086	6.3392	5.972	5.9788	5.9745
neg_2233	3-Methyl-5-pentyl-2-furannonanoic acid	metab_4416	-	-	-	-	HMDB0031091	neg	-	-	-	-	Lipids and lipid-like molecules	Fatty Acyls	661.469	2M+FA-H	C19H32O3	7.1775	0.0297615	0	74.1	0.20214	57818-39-0	Fatty acids and conjugates	5.6555	5.4251	5.2898	4.0677	4.0969	4.1612	5.7415	5.8209	5.7527	5.3286	5.1223	5.312	5.6629	5.6406	5.6408
neg_2245	PI(18:0/18:2(9Z,12Z))	metab_4428	-	-	-	C00626	LMGP06010956;HMDB0009809	neg	-	-	-	-	Lipids and lipid-like molecules	Glycerophospholipids	861.549	M-H	C45H83O13P	7.2395	0.0295702	0	76.4	-0.5444	-	Glycerophosphoinositols	6.3264	6.6896	6.7286	6.8224	6.975	6.8544	6.1422	6.6065	6.6825	7.072	7.0366	7.1112	6.8057	6.7808	6.7883
neg_2282	PE(P-16:0/18:1(12Z)-2OH(9,10))	metab_4464	-	-	-	-	HMDB0285224	neg	-	-	-	-	Not Available	Not Available	754.503	M+Na-2H	C39H76NO9P	7.3935	0.21919	0	64.1	3.12708	-	Not Available	5.5105	5.3088	5.5862	4.9809	4.0609	4.3146	5.1631	5.3253	5.404	4.6631	4.0149	4.0679	4.7993	4.7219	4.6047
neg_2296	Digalactosyldiacylglycerol	metab_4477	-	-	-	-	HMDB0260014	neg	-	-	-	-	Lipids and lipid-like molecules	Glycerolipids	961.611	M+FA-H	C49H88O15	7.4714	0.0326061	0	69	0.953338	-	Glycosylglycerols	6.151	5.8447	6.0036	5.2632	6.0932	5.9792	5.9589	5.6216	5.7162	5.0135	5.1796	5.5105	5.9908	5.9665	5.9665
neg_26	3',6-Disinapoylsucrose	metab_4808	-	-	-	-	HMDB0040838	neg	-	-	-	-	Phenylpropanoids and polyketides	Cinnamic acids and derivatives	753.225	M-H, M+FA-H, M+Na-2H	C34H42O19	4.8589	0.00771177	94.9	0	0.843279	139891-98-8	Hydroxycinnamic acids and derivatives	6.3104	6.3804	6.2509	5.9062	5.1958	5.6102	6.5049	6.438	6.4261	5.9044	6.0383	5.9452	6.2792	6.2735	6.2733
neg_288	Cer(d18:1/18:1(9Z)-O(12,13))	metab_5101	-	-	-	-	HMDB0290022	neg	-	-	-	-	Not Available	Not Available	622.505	M-H, M+FA-H	C36H67NO4	7.4478	0.0684486	0	66	-0.0552815	-	Not Available	6.139	6.1863	6.272	6.0141	5.617	5.7698	5.497	5.641	5.6412	5.4245	4.8836	5.0874	5.7444	5.6947	5.6931
neg_2884	PG(PGF1alpha/a-25:0)	metab_5104	-	-	-	-	HMDB0271042	neg	-	-	-	-	Not Available	Not Available	985.611	M+K-2H	C51H97O13P	7.3012	0.0127835	0	47.2	-4.2713	-	Not Available	6.2462	6.1259	5.993	5.1935	5.7006	5.7416	6.0755	5.8407	5.9196	5.0874	5.435	5.5143	6.1072	6.1092	6.0987
neg_2885	LysoPA(18:1(9Z)/0:0)	metab_5105	-	-	-	-	HMDB0007855	neg	-	-	-	-	Lipids and lipid-like molecules	Glycerophospholipids	417.241	M-H2O-H	C21H41O7P	7.2935	0.0177865	0	58.8	-0.318412	-	Glycerophosphates	5.6599	5.6312	5.5301	5.3644	5.5291	5.5331	5.6925	5.6916	5.7203	5.3437	5.2201	4.9014	5.5249	5.5269	5.5391
neg_2888	PA(18:2(9Z,12Z)/24:0)	metab_5108	-	map01100;map00564;map01110;map00561;map04070	Metabolic pathways;Glycerophospholipid metabolism;Biosynthesis of secondary metabolites;Glycerolipid metabolism;Phosphatidylinositol signaling system	C00416	PW_C062389;HMDB0114971	neg	Lipids	Phospholipids	Metabolism;Metabolism;Metabolism;Metabolism;Environmental Information Processing	Global and overview maps;Lipid metabolism;Global and overview maps;Lipid metabolism;Signal transduction	Lipids and lipid-like molecules	Glycerophospholipids	821.542	M+K-2H	C45H85O8P	7.2779	0.0423899	0	39.8	-5.70348	-	Glycerophosphates	5.8482	5.6103	5.3678	4.5831	4.6683	4.2468	5.6213	5.3472	5.1963	4.9865	4.5968	4.6537	5.4831	5.5157	5.4854
neg_2944	LysoPC(17:0/0:0)	metab_5165	-	map00564	Glycerophospholipid metabolism	C04230	HMDB0012108	neg	Lipids	Phospholipids	Metabolism	Lipid metabolism	Lipids and lipid-like molecules	Glycerophospholipids	508.341	M-H	C25H52NO7P	7.0685	0.0182879	0	52.3	-0.533074	50930-23-9	Glycerophosphocholines	5.9556	5.8652	5.5435	5.5566	5.081	5.503	6.0716	5.9782	6.0015	5.6296	5.5805	5.7592	5.9739	5.9886	5.9762
neg_2957	9,10-Epoxy-18-hydroxy-octadecanoic acid	metab_5176	-	map00073	Cutin, suberine and wax biosynthesis	C19620	HMDB0302107	neg	-	-	Metabolism	Lipid metabolism	Lipids and lipid-like molecules	Fatty Acyls	687.503	2M+Hac-H	C18H34O4	7.0138	0.058609	0	64	-3.75965	-	Fatty acids and conjugates	5.9834	5.7831	5.5929	5.4917	5.9959	6.0215	4.8507	4.6976	4.8973	5.3926	5.929	5.9374	5.7529	5.7088	5.7103
neg_3027	1-O-Isopentyl-3-O-octadec-2-enoyl glycerol	metab_5246	-	-	-	-	HMDB0302897	neg	-	-	-	-	Lipids and lipid-like molecules	Glycerolipids	471.369	M+FA-H	C26H50O4	6.8653	0.0216588	0	68.9	-0.513009	-	Diradylglycerols	4.8113	5.2651	4.6361	4.7234	4.7124	4.7565	5.4793	5.4034	5.5849	4.9491	4.7035	4.9386	5.1635	5.147	5.1477
neg_3252	PE(18:3/0:0)	metab_5486	-	-	-	-	-	neg	-	-	-	-	-	-	474.262	M-H	C23H42NO7P	6.505	0.00825536	75.3	0	-0.324159	-	-	6.0173	6.096	6.0273	5.6954	5.5256	5.783	5.7049	5.6414	5.6887	5.1896	5.1988	5.3571	5.7902	5.7841	5.7839
neg_3379	(9E)-Octadec-9-enedioylcarnitine	metab_5623	-	-	-	-	HMDB0241537	neg	-	-	-	-	Lipids and lipid-like molecules	Fatty Acyls	492.273	M+K-2H	C25H45NO6	6.2536	0.0357676	0	36.6	-0.306895	-	Fatty acid esters	6.0589	5.6246	6.0447	5.5106	5.3262	5.5469	5.4912	5.4557	5.6002	4.8806	4.9612	4.7806	5.6431	5.6163	5.6166
neg_3413	Sulfasalazine	metab_5662	-	-	-	C07316	HMDB0014933	neg	-	-	-	-	Organoheterocyclic compounds	Azobenzenes	419.041	M+Na-2H	C18H14N4O5S	6.1988	0.0167642	0	48.3	-5.9528	599-79-1	Not Available	5.8383	5.8178	5.5539	6.3374	6.6388	6.6429	6.0083	5.9789	5.819	6.444	6.6374	6.6957	6.1826	6.1951	6.1955
neg_3429	DG(14:0/0:0/PGE2)	metab_5679	-	-	-	-	HMDB0295079	neg	-	-	-	-	Not Available	Not Available	681.457	M+FA-H	C37H64O8	6.1669	0.0256344	0	75.5	-2.59775	-	Not Available	5.7734	5.4035	5.8315	5.3575	5.1572	5.1717	4.8728	4.8892	4.9373	4.6776	4.0108	4.3315	5.2741	5.2553	5.2545
neg_3478	Estriol	metab_5733	-	map01100	Metabolic pathways	C05141	HMDB0000347;HMDB0000153;PW_C000100;MJDBOTE0000808	neg	Steroids;Hormones and transmitters	18-Carbon atoms;Steroid hormones	Metabolism	Global and overview maps	Lipids and lipid-like molecules	Steroids and steroid derivatives	333.17	M+FA-H	C18H24O3	6.1042	0.00624668	0	45.8	-0.893654	50-27-1;547-81-9	Estrane steroids	4.9978	5.4323	5.0767	4.9928	4.9821	5.0237	5.0273	4.7151	4.9761	5.3274	5.3566	5.3402	5.1282	5.1251	5.1305
neg_3500	5-Taurinomethyl-2-thiouridine	metab_5759	-	-	-	-	HMDB0011610	neg	-	-	-	-	Nucleosides, nucleotides, and analogues	Pyrimidine nucleosides	378.047	M-H2O-H	C12H19N3O8S2	6.0723	0.0595809	0	62.4	7.58633	497258-54-5	Not Available	4.7748	4.6656	4.5663	5.1842	5.0619	5.0952	4.0753	4.3055	3.8987	5.0587	5.0903	5.2312	4.8334	4.7887	4.8353
neg_3515	Aflatoxin B1 diol	metab_5775	-	-	-	C19588	HMDB0060430	neg	-	-	-	-	Phenylpropanoids and polyketides	Coumarins and derivatives	367.046	M+Na-2H	C17H14O8	6.0566	0.00901159	0	47.1	5.89616	50668-79-6	Furanocoumarins	5.3451	5.2242	5.101	5.7626	5.8357	5.8978	5.6101	5.4284	5.5107	5.8371	5.8521	5.951	5.5979	5.5999	5.5923
neg_3528	Ayapin	metab_5789	-	-	-	C18078	HMDB0301806	neg	-	-	-	-	Phenylpropanoids and polyketides	Coumarins and derivatives	235.024	M+FA-H	C10H6O4	6.0488	0.0460871	0	57.1	-1.93729	494-56-4	Not Available	3.3456	3.0358	3.0628	4.3936	4.6685	4.4986	3.3355	3.3301	3.1726	4.4596	4.3669	4.7865	4.1035	4.1051	4.1385
neg_3560	6a, 3'-p-Dihydroxypaclitaxel	metab_5822	-	-	-	-	HMDB0060795	neg	-	-	-	-	Benzenoids	Benzene and substituted derivatives	924.243	M+Cl	C45H47NO18	5.9931	0.023343	0	81.4	-6.71578	-	Benzoic acids and derivatives	5.7897	5.8583	5.8212	5.3723	5.2754	5.2667	5.3934	5.4836	5.7036	4.9652	5.0489	5.2113	5.5657	5.5482	5.5483
neg_3586	Ent-Gallocatechin 3-gallate	metab_5850	-	-	-	-	HMDB0301673	neg	-	-	-	-	Phenylpropanoids and polyketides	Flavonoids	439.067	M-H2O-H	C22H18O11	5.9572	0.00602908	0	68	-0.0847365	68-22-4	Flavonoid glycosides	5.6421	5.6576	5.7657	5.2586	5.4141	5.2992	5.7478	5.6543	5.8513	5.037	5.0448	5.0745	5.5878	5.5864	5.5915
neg_360	Heptanoylcarnitine	metab_5866	-	-	-	-	HMDB0013238;LMFA07070068	neg	-	-	-	-	Lipids and lipid-like molecules	Fatty Acyls	605.406	2M+FA-H, 2M+Hac-H	C14H27NO4	6.8574	0.0193522	0	45.8	7.56939	-	Fatty acid esters	5.5838	5.4045	5.4299	5.1132	4.5113	4.4789	5.7895	5.7477	5.792	5.3123	5.2324	5.4549	5.7136	5.699	5.6992
neg_3615	R-limonene	metab_5883	-	map01100;map01110;map00903;map00902	Metabolic pathways;Biosynthesis of secondary metabolites;Limonene and pinene degradation;Monoterpenoid biosynthesis	C06099	HMDB0003375;HMDB0257077	neg	-	-	Metabolism;Metabolism;Metabolism;Metabolism	Global and overview maps;Global and overview maps;Metabolism of terpenoids and polyketides;Metabolism of terpenoids and polyketides	Lipids and lipid-like molecules	Prenol lipids	229.108	M+FA-H	C10H16O3	5.901	0.0197038	0	39	-2.41299	5989-27-5	Monoterpenoids	4.4061	4.2754	4.6879	4.2519	4.6425	4.7373	3.3235	3.9403	3.482	4.4582	4.2538	4.0384	4.3529	4.3552	4.3687
neg_3619	5,7-Dihydroxy-4H-1-benzopyran-4-one	metab_5887	-	-	-	C09001	HMDB0032950	neg	-	-	-	-	Organoheterocyclic compounds	Benzopyrans	223.024	M+FA-H	C9H6O4	5.8882	0.0343644	0	33	-3.22166	31721-94-5	1-benzopyrans	2.5483	2.554	2.595	4.6263	4.4221	4.7926	2.5283	2.4963	2.5029	4.3067	3.3162	3.9585	3.8504	3.8533	3.8773
neg_3624	Gomphidic acid	metab_5893	-	-	-	-	HMDB0033542	neg	-	-	-	-	Benzenoids	Phenols	371.041	M-H	C18H12O9	5.8699	0.0418864	0	50.4	-0.828805	25328-77-2	Benzenetriols and derivatives	4.1493	4.0498	3.897	5.0573	5.3334	5.0953	4.2058	3.8922	4.1205	5.1564	5.0795	5.5437	4.7952	4.8272	4.8272
neg_3627	5,8-Dihydroxy-1,4-naphthoquinone	metab_5896	-	-	-	C01938	HMDB0255448	neg	-	-	-	-	Benzenoids	Naphthalenes	235.024	M+FA-H	C10H6O4	5.8699	0.028051	0	61.5	-2.05468	475-38-7	Naphthoquinones	3.564	3.5049	3.3403	4.9347	5.2103	5.0248	4.1019	3.9025	3.8389	5.1305	5.0679	5.4945	4.7039	4.7059	4.7258
neg_3660	Yakuchinone-A	metab_5933	-	-	-	C20211	HMDB0259946	neg	-	-	-	-	Phenylpropanoids and polyketides	Diarylheptanoids	357.171	M+FA-H	C20H24O3	5.719	0.0499307	0	94.8	-0.648642	78954-23-1	Linear diarylheptanoids	4.911	4.7735	4.8858	4.5934	4.5137	4.5707	4.4362	4.4111	4.337	3.574	3.07	3.1075	4.5647	4.5666	4.5276
neg_3663	Quercetin 3-O-rhamnoside	metab_5936	-	map00944	Flavone and flavonol biosynthesis	C01750	HMDB0257017;HMDB0033751	neg	-	-	Metabolism	Biosynthesis of other secondary metabolites	Phenylpropanoids and polyketides	Flavonoids	469.077	M+Na-2H	C21H20O11	5.7033	0.00474277	0	70	4.8699	522-12-3	Flavonoid glycosides	5.5198	5.5695	5.267	6.1684	6.3892	6.1874	5.8324	5.7037	5.5976	6.1394	6.4422	6.3071	5.9478	5.9512	5.9515
neg_3664	Azlocillin	metab_5937	-	-	-	C06839	HMDB0015194	neg	-	-	-	-	Organic acids and derivatives	Carboxylic acids and derivatives	496.11	M+Cl	C20H23N5O6S	5.6964	0.00804652	0	56.3	7.56633	37091-66-0	Amino acids, peptides, and analogues	5.7197	5.5065	5.583	4.5602	4.4618	4.4087	5.5802	5.6462	5.5123	4.3329	4.4691	4.6132	5.3297	5.3366	5.332
neg_3677	Lactose 6-phosphate	metab_5951	-	map01100;map00052	Metabolic pathways;Galactose metabolism	C05396	HMDB0006789	neg	-	-	Metabolism;Metabolism	Global and overview maps;Carbohydrate metabolism	Organic oxygen compounds	Organooxygen compounds	403.067	M-H2O-H	C12H23O14P	5.619	0.0220707	0	37.8	5.15032	-	Carbohydrates and carbohydrate conjugates	3.046	3.0517	3.0787	4.9975	5.0288	5.1607	3.026	2.9939	3.0006	4.7984	5.1607	4.8119	4.4781	4.48	4.4624
neg_3692	6''-O-Acetylglycitin	metab_5968	-	-	-	-	HMDB0039489	neg	-	-	-	-	Phenylpropanoids and polyketides	Isoflavonoids	509.109	M+Na-2H	C24H24O11	5.5432	0.018839	0	74.8	4.69089	134859-96-4	Isoflavonoid O-glycosides	4.2878	4.3607	4.277	5.7166	5.5044	5.8179	3.6513	3.5761	3.7511	5.2895	5.2128	5.161	4.898	4.9132	4.9005
neg_3693	Furaptra	metab_5969	-	-	-	-	HMDB0252531	neg	-	-	-	-	Organic acids and derivatives	Carboxylic acids and derivatives	479.062	M+FA-H	C18H14N2O11	5.5432	0.0100721	0	56.4	8.98668	-	Tetracarboxylic acids and derivatives	5.5111	5.5714	5.5087	5.2855	5.3074	5.3779	5.7633	5.5751	5.5499	5.2062	5.1285	5.2031	5.4784	5.4804	5.4867
neg_3699	3-Dehydroquinic acid	metab_5974	-	map01100;map00400;map01110;map01230	Metabolic pathways;Phenylalanine, tyrosine and tryptophan biosynthesis;Biosynthesis of secondary metabolites;Biosynthesis of amino acids	C00944	HMDB0012710	neg	-	-	Metabolism;Metabolism;Metabolism;Metabolism	Global and overview maps;Amino acid metabolism;Global and overview maps;Global and overview maps	Organic acids and derivatives	Hydroxy acids and derivatives	211.024	M+Na-2H	C7H10O6	5.5304	0.0100404	0	45.1	9.44343	10534-44-8	Alpha hydroxy acids and derivatives	5.4953	5.6672	5.4257	6.9505	6.8826	7.11	5.6495	5.6277	5.4226	6.6702	6.3535	6.4516	6.3953	6.3975	6.4037
neg_3704	(E)-3-[1-(Benzenesulfonyl)indol-5-yl]-N-hydroxyprop-2-enamide	metab_5981	-	-	-	-	HMDB0249930	neg	-	-	-	-	Phenylpropanoids and polyketides	Cinnamic acids and derivatives	683.126	2M-H	C17H14N2O4S	5.5078	0.017799	0	36.5	-2.28661	-	Not Available	6.363	6.3541	6.3141	5.5291	5.3156	5.3859	6.107	6.3153	6.2239	5.2532	5.0422	4.8981	6.0905	6.0772	6.0772
neg_3710	Sialyl Lewis x antigen	metab_5988	-	-	-	-	HMDB0258280	neg	-	-	-	-	Organic oxygen compounds	Organooxygen compounds	855.257	M+Cl	C31H52N2O23	5.4733	0.0152513	0	70.9	-9.87815	-	Carbohydrates and carbohydrate conjugates	5.8523	5.9843	5.7799	5.7846	4.1046	5.0596	6.0366	6.1011	5.7463	5.3139	5.4693	5.4688	5.7981	5.7864	5.787
neg_3712	Morin	metab_5990	-	-	-	C10105	HMDB0030796;LMPK12112517;MJDBOTE0001649	neg	-	-	-	-	Phenylpropanoids and polyketides	Flavonoids	603.078	2M-H	C15H10O7	5.4655	0.00452264	0	80.2	0.613644	480-16-0	Flavones	6.8295	6.9872	6.6299	6.0237	6.0113	5.9458	6.8938	7.0028	6.801	5.9749	5.9634	5.7542	6.6793	6.6765	6.6755
neg_3714	Pinoquercetin	metab_5992	-	-	-	C10120	LMPK12112292;HMDB0256564	neg	-	-	-	-	Phenylpropanoids and polyketides	Flavonoids	361.056	M+FA-H	C16H12O7	5.4581	0.041895	0	31.4	-0.466855	491-49-6	Flavones	4.526	4.6137	4.395	3.4686	4.5192	4.0561	4.9345	4.9599	4.1883	3.9481	3.162	3.4892	4.4884	4.4911	4.5208
neg_3719	Quercitrin	metab_5997	-	map00944	Flavone and flavonol biosynthesis	C01750	HMDB0257017;LMPK12112171;HMDB0033751	neg	-	-	Metabolism	Biosynthesis of other secondary metabolites	Phenylpropanoids and polyketides	Flavonoids	469.078	M+Na-2H	C21H20O11	5.4275	0.00565597	0	70.7	5.16052	522-12-3	Flavonoid glycosides	5.3708	5.3963	5.1173	5.9257	6.2012	5.9563	5.6597	5.5093	5.3708	5.9076	6.2347	6.0795	5.7516	5.7536	5.7565
neg_3721	DIMP	metab_6000	-	map01232;map00230	Nucleotide metabolism;Purine metabolism	C06196	HMDB0006555;HMDB0251357	neg	-	-	Metabolism;Metabolism	Global and overview maps;Nucleotide metabolism	Nucleosides, nucleotides, and analogues	Purine nucleotides	331.046	M-H	C10H13N4O7P	5.4275	0.0344541	0	71.2	2.53626	3393-18-8	Purine deoxyribonucleotides	4.821	4.8896	4.8518	4.6625	4.5649	4.7192	5.1473	5.192	4.9098	4.4889	4.4124	4.5009	4.8313	4.8575	4.8575
neg_3726	Chlorazine	metab_6005	-	-	-	C06906	HMDB0250090;HMDB0014620	neg	-	-	-	-	Organoheterocyclic compounds	Triazines	559.276	2M+FA-H	C11H20ClN5	5.4033	0.0106706	0	62.2	-6.93618	50-53-3	Aminotriazines	5.1833	5.5587	5.3793	5.0631	4.7464	4.896	4.9681	4.8745	4.8008	4.2356	4.1725	4.1488	5.0902	5.0821	5.0823
neg_3730	Gossypetin	metab_6009	-	-	-	C04109	LMPK12113231	neg	-	-	-	-	-	-	299.019	M-H2O-H	C15H10O8	5.3979	0.01291	46	0	-0.81152	489-35-0	-	5.9432	5.9308	5.921	7.7237	7.5956	7.4803	6.2599	6.2234	6.108	6.7653	7.5061	6.9102	6.4608	6.4703	6.4707
neg_3735	Afzelin	metab_6014	-	map00944	Flavone and flavonol biosynthesis	C16911	LMPK12111842;HMDB0248048	neg	-	-	Metabolism	Biosynthesis of other secondary metabolites	Phenylpropanoids and polyketides	Coumarins and derivatives	477.104	M+FA-H	C21H20O10	5.3723	0.00925589	0	49.7	-0.474009	482-39-3	Pyranocoumarins	6.4899	6.274	6.3961	6.1587	6.2093	6.2454	6.6869	6.6539	6.5392	6.2339	6.2617	6.3205	6.4177	6.4245	6.4249
neg_3737	3-[(1-Carboxyvinyl)oxy]benzoic Acid	metab_6016	-	-	-	-	-	neg	-	-	-	-	-	-	253.035	M+FA-H	C10H8O5	5.3649	0.0500485	34.7	0	-1.30895	-	-	4.3569	4.2176	4.5933	4.5665	4.1594	4.4889	3.1429	2.6883	2.8309	3.8661	3.8886	3.9235	4.127	4.1676	4.1623
neg_3742	Advantame	metab_6022	-	-	-	-	HMDB0248034	neg	-	-	-	-	Organic acids and derivatives	Carboxylic acids and derivatives	493.172	M+Cl	C24H30N2O7	5.3491	0.00419543	0	32.7	-6.95244	-	Amino acids, peptides, and analogues	4.9765	4.9342	5.1015	4.469	4.5327	4.6214	5.5004	5.3668	5.4385	4.8924	4.8439	4.859	5.1259	5.1227	5.1229
neg_3745	9-(2,3-dihydroxypropoxy)-9-Oxononanoic Acid	metab_6025	-	-	-	-	-	neg	-	-	-	-	-	-	261.134	M-H	C12H22O6	5.3491	0.0114448	56.4	0	-0.842817	-	-	4.8416	4.7583	4.956	5.1082	5.1473	5.1639	4.5575	4.676	4.4771	5.2181	4.9853	5.116	4.8683	4.8704	4.8777
neg_3757	Isorhamnetin-3-O-rutinoside	metab_6038	-	-	-	-	-	neg	-	-	-	-	-	-	623.162	M-H	C28H32O16	5.2559	0.00496157	91.9	0	0.58286	-	-	5.5041	5.2605	5.5279	5.0773	5.0354	5.1057	5.4599	5.3917	5.3758	4.8871	5.1185	4.9079	5.3099	5.3119	5.3076
neg_3770	Homopisatin	metab_6053	-	-	-	C10539	HMDB0034116;LMPK12070130	neg	-	-	-	-	Phenylpropanoids and polyketides	Isoflavonoids	345.098	M+FA-H	C17H16O5	5.2027	0.0206561	0	36.8	-0.945166	3187-52-8	Furanoisoflavonoids	5.2853	5.1388	5.1889	4.8417	4.8048	4.8643	4.3315	4.6405	4.316	3.9636	3.9381	3.991	4.8557	4.8714	4.8713
neg_3775	Coniferyl ferulate	metab_6058	-	-	-	C17855	HMDB0250437	neg	-	-	-	-	Phenylpropanoids and polyketides	Cinnamic acids and derivatives	401.124	M+FA-H	C20H20O6	5.1958	0.00276051	0	63.5	-0.751973	63644-62-2	Hydroxycinnamic acids and derivatives	5.3722	5.4022	5.9278	3.6565	3.6757	3.7198	4.7084	4.5857	5.2179	3.6554	3.6298	3.6828	5.2279	5.2284	5.2302
neg_3797	1-Methoxy-1-(2,4,5-trimethoxyphenyl)-2-propanol	metab_6082	-	-	-	-	HMDB0031772	neg	-	-	-	-	Benzenoids	Benzene and substituted derivatives	557.26	2M+FA-H	C13H20O5	5.1147	0.00407272	0	45.2	0.20582	98205-47-1	Phenylpropanes	5.8593	5.9616	6.0032	5.6417	5.4797	5.6138	5.6407	5.4001	5.5044	5.0596	5.2259	5.1067	5.7209	5.7178	5.7179
neg_3798	Glycineamideribotide	metab_6083	-	map01100;map01110;map00230	Metabolic pathways;Biosynthesis of secondary metabolites;Purine metabolism	C03838	HMDB0002022;PW_C001355	neg	-	-	Metabolism;Metabolism;Metabolism	Global and overview maps;Global and overview maps;Nucleotide metabolism	Nucleosides, nucleotides, and analogues	Glycinamide ribonucleotides	617.115	2M+FA-H	C7H15N2O8P	5.1093	0.0314728	0	34.8	5.99258	10074-18-7	Not Available	5.5185	5.6417	5.2609	6.3062	6.4369	6.3355	5.2034	5.3311	4.9793	5.6151	6.0781	5.8224	5.8129	5.8156	5.7905
neg_3807	Glycosminine	metab_6094	-	-	-	C10688	HMDB0033122	neg	-	-	-	-	Organoheterocyclic compounds	Diazanaphthalenes	471.187	2M-H	C15H12N2O	5.0668	0.0152256	0	45.9	9.19225	4765-56-4	Benzodiazines	4.9344	4.9904	5.161	4.6255	4.633	4.8046	4.4962	4.535	4.9279	3.5983	4.2433	3.6257	4.7608	4.748	4.7576
neg_3808	Hyperoside	metab_6095	-	-	-	C10073	HMDB0030775	neg	-	-	-	-	Phenylpropanoids and polyketides	Flavonoids	463.088	M-H	C21H20O12	5.0668	0.0041035	96.8	0	-0.0507808	482-36-0	Flavonoid glycosides	6.844	6.5887	6.7146	6.5235	6.5361	6.583	6.921	6.9696	6.7007	6.3977	6.4538	6.4774	6.709	6.7111	6.7075
neg_3814	Acacetin 7-[apiosyl(1->6)-glucoside]	metab_6102	-	map00944	Flavone and flavonol biosynthesis	C01470	HMDB0035023	neg	-	-	Metabolism	Biosynthesis of other secondary metabolites	Phenylpropanoids and polyketides	Flavonoids	623.162	M+FA-H	C27H30O14	5.054	0.0234799	0	33.2	0.477378	239106-94-6	Flavonoid glycosides	5.0716	5.1614	5.0417	4.7964	4.6659	4.7573	4.5552	4.7124	4.678	4.2842	4.3643	4.1589	4.8861	4.8687	4.8685
neg_3816	Gein	metab_6104	-	-	-	C17058	HMDB0029909	neg	Steroids	24-Carbon atoms	-	-	Organic oxygen compounds	Organooxygen compounds	479.156	M+Na-2H	C21H30O11	5.0397	0.0546912	0	39.5	4.60965	585-90-0	Carbohydrates and carbohydrate conjugates	4.4568	4.4348	4.7694	3.4414	3.4687	4.0406	5.2629	5.2041	5.4324	4.3799	4.6428	4.4508	4.88	4.8826	4.8395
neg_3835	Butin	metab_6125	-	map00941	Flavonoid biosynthesis	C09614	LMPK12140075;HMDB0249463	neg	-	-	Metabolism	Biosynthesis of other secondary metabolites	Phenylpropanoids and polyketides	Flavonoids	317.066	M+FA-H	C15H12O5	4.9633	0.0120972	0	58.7	-0.954366	492-14-8	Flavans	4.7258	4.9436	4.6162	5.5759	6.2136	5.6809	3.9304	4.3101	3.9112	4.969	5.2763	5.4086	5.3331	5.3431	5.3354
neg_3837	Chorismate	metab_6127	-	map01100;map00996;map01110;map01240;map00130;map00999;map01230;map00790;map00400	Metabolic pathways;Biosynthesis of various alkaloids;Biosynthesis of secondary metabolites;Biosynthesis of cofactors;Ubiquinone and other terpenoid-quinone biosynthesis;Biosynthesis of various plant secondary metabolites;Biosynthesis of amino acids;Folate biosynthesis;Phenylalanine, tyrosine and tryptophan biosynthesis	C00251	HMDB0012199	neg	-	-	Metabolism;Metabolism;Metabolism;Metabolism;Metabolism;Metabolism;Metabolism;Metabolism;Metabolism	Global and overview maps;Biosynthesis of other secondary metabolites;Global and overview maps;Global and overview maps;Metabolism of cofactors and vitamins;Biosynthesis of other secondary metabolites;Global and overview maps;Metabolism of cofactors and vitamins;Amino acid metabolism	Organic acids and derivatives	Carboxylic acids and derivatives	451.088	2M-H	C10H10O6	4.9505	0.0112604	0	57.3	-0.167729	617-12-9	Dicarboxylic acids and derivatives	5.022	5.1799	4.5723	3.6525	3.4763	4.0914	5.7523	5.7505	5.8299	4.9381	5.1719	5.0514	5.3206	5.3252	5.3155
neg_3857	L-arogenate	metab_6149	-	map01100;map00400;map01110;map01230	Metabolic pathways;Phenylalanine, tyrosine and tryptophan biosynthesis;Biosynthesis of secondary metabolites;Biosynthesis of amino acids	C00826	HMDB0304400;HMDB0304809	neg	-	-	Metabolism;Metabolism;Metabolism;Metabolism	Global and overview maps;Amino acid metabolism;Global and overview maps;Global and overview maps	Organic acids and derivatives	Carboxylic acids and derivatives	263.02	M+K-2H	C10H12NO5-	4.8806	0.0239445	0	51.6	-2.87344	53078-86-7	Amino acids, peptides, and analogues	3.9566	3.8833	3.9139	4.4081	4.4723	4.5397	4.1611	3.987	3.9943	4.6967	4.8615	4.5769	4.353	4.372	4.3554
neg_3860	Taxifolin 3-arabinoside	metab_6153	-	-	-	-	HMDB0041418	neg	-	-	-	-	Phenylpropanoids and polyketides	Diarylheptanoids	435.093	M-H	C20H20O11	4.8732	0.0214487	0	57.8	-0.359062	-	Cyclic diarylheptanoids	4.3927	4.2903	4.3078	3.2479	3.601	3.3112	4.8757	4.8511	4.781	4.3431	4.5293	4.1101	4.5539	4.5377	4.5379
neg_3862	3'-Sialyl-3-fucosyllactose	metab_6155	-	-	-	-	HMDB0006606	neg	-	-	-	-	Organic oxygen compounds	Organooxygen compounds	816.221	M+K-2H	C29H49NO23	4.8589	0.0157471	0	66.7	4.19707	122560-33-2	Carbohydrates and carbohydrate conjugates	5.7153	5.7462	5.6395	5.2035	3.9194	4.9852	5.9214	5.8417	5.837	5.212	5.397	5.2459	5.68	5.6682	5.6682
neg_3871	Mitoxantrone dicarboxylic acid	metab_6165	-	-	-	-	HMDB0254764	neg	-	-	-	-	Benzenoids	Anthracenes	509.11	M+K-2H	C22H24N4O8	4.8253	0.00628421	0	47.1	3.28211	-	Anthraquinones	5.531	5.5659	5.6083	5.3281	5.2469	5.3088	5.5603	5.4061	5.625	4.953	5.0886	5.1183	5.4703	5.4656	5.4656
neg_3887	Cystine-glutamate	metab_6182	-	-	-	-	HMDB0250714	neg	-	-	-	-	Organic acids and derivatives	Carboxylic acids and derivatives	364.029	M-H2O-H	C11H17N3O8S2	4.7786	0.0188391	0	35.1	1.76915	-	Tetracarboxylic acids and derivatives	5.0512	5.0029	5.351	5.3709	5.3683	5.5061	4.8105	4.7704	4.7075	5.2676	5.3244	5.4723	5.2157	5.2027	5.2179
neg_3888	Metiamide	metab_6183	-	-	-	C07449	HMDB0061722;PW_C040730	neg	-	-	-	-	Organoheterocyclic compounds	Azoles	279.051	M+Cl	C9H16N4S2	4.7786	0.0173803	0	44.2	-1.04506	34839-70-8	Imidazoles	6.1309	6.1219	6.4392	6.4107	6.3982	6.5586	5.9462	5.8645	5.882	6.3079	6.3916	6.5055	6.2576	6.2538	6.2683
neg_3896	Remogliflozin A	metab_6192	-	-	-	-	HMDB0257146	neg	-	-	-	-	Organic oxygen compounds	Organooxygen compounds	487.182	M+K-2H	C23H34N2O7	4.7224	0.00748123	0	35.2	-7.06514	-	Carbohydrates and carbohydrate conjugates	5.3302	5.3747	5.4166	5.2127	5.278	5.3644	4.8349	5.0413	4.9995	3.9476	4.2179	3.7545	5.1538	5.148	5.1483
neg_3901	Diethyl oxalpropionate	metab_6199	-	-	-	C04067	HMDB0032306	neg	-	-	-	-	Organic acids and derivatives	Keto acids and derivatives	223.061	M+Na-2H	C9H14O5	4.7145	0.0173211	0	34.5	9.38838	759-65-9	Beta-keto acids and derivatives	4.8151	4.3762	4.526	4.9538	4.9654	5.0204	3.802	3.5228	3.8015	4.5417	4.4993	4.5642	4.5521	4.5542	4.566
neg_3906	Catechin 7-glucoside	metab_6204	-	-	-	C09617	HMDB0037949	neg	-	-	-	-	Phenylpropanoids and polyketides	Flavonoids	433.114	M-H2O-H	C21H24O11	4.6988	0.0333396	0	68.4	-0.343009	65597-47-9	Flavonoid glycosides	4.2681	3.9509	4.1848	5.0839	5.0642	5.0643	4.3322	4.5711	4.2861	4.9592	4.9932	4.9072	4.6899	4.6928	4.6662
neg_3919	Tetracycline	metab_6218	-	map01100;map01110	Metabolic pathways;Biosynthesis of secondary metabolites	C06570	HMDB0246415;PW_C009228;HMDB0014897	neg	Antibiotics	Polyketides and nonribosomal peptides	Metabolism;Metabolism	Global and overview maps;Global and overview maps	Phenylpropanoids and polyketides	Tetracyclines	479.119	M+Cl	C22H24N2O8	4.6556	0.00346457	0	43.3	-7.34409	60-54-8	Not Available	6.8371	6.6396	6.7406	6.473	6.4938	6.5348	6.3635	6.3614	6.5464	5.991	6.1016	6.0087	6.5483	6.5503	6.5474
neg_3931	Flavonol 3-O-D-glucoside	metab_6232	-	-	-	C03946	HMDB0252295	neg	-	-	-	-	Phenylpropanoids and polyketides	Flavonoids	445.114	M+FA-H	C21H20O8	4.6059	0.0298898	0	36.9	-0.0502294	-	Flavonoid glycosides	4.2508	4.4447	4.9749	5.2319	5.2456	5.2656	3.3433	3.538	4.0101	4.7222	5.0225	4.6102	4.7143	4.6927	4.7164
neg_3939	Alpha-L-Rhamnopyranosyl-(1->3)-alpha-D-galactopyranosyl-(1->3)-L-fucose	metab_6240	-	-	-	-	HMDB0039741	neg	-	-	-	-	Organic oxygen compounds	Organooxygen compounds	509.13	M+K-2H	C18H32O14	4.5852	0.00358506	0	75	4.565	71144-75-7	Carbohydrates and carbohydrate conjugates	5.7888	5.8307	5.8264	5.4745	5.4277	5.4894	5.0823	5.2014	5.4318	4.5431	4.7139	4.4131	5.5263	5.5283	5.5252
neg_3960	Aurintricarboxylic acid	metab_6264	-	-	-	-	HMDB0248731	neg	-	-	-	-	Benzenoids	Benzene and substituted derivatives	467.062	M+FA-H	C22H14O9	4.5287	0.00202351	0	60.8	-0.446705	-	Diphenylmethanes	3.0116	3.4076	3.0443	5.5456	5.6229	5.6107	3.1514	3.9345	3.4336	5.3694	5.5374	5.4542	5.0092	5.0075	5.0078
neg_3986	Vanillin	metab_6292	-	map01100;map00996;map01110	Metabolic pathways;Biosynthesis of various alkaloids;Biosynthesis of secondary metabolites	C00755	HMDB0245834;HMDB0012308;MJDBOTE0000374	neg	-	-	Metabolism;Metabolism;Metabolism	Global and overview maps;Biosynthesis of other secondary metabolites;Global and overview maps	Benzenoids	Phenols	151.039	M-H	C8H8O3	4.4066	0.0082751	77.5	0	-5.89208	121-33-5	Methoxyphenols	3.9233	3.9768	4.0559	4.4998	4.5424	4.5045	4.0364	4.0109	4.027	4.543	4.544	4.7122	4.2236	4.2257	4.2306
neg_3996	Gulonic acid	metab_6303	-	map01100;map00040;map00053;map01240	Metabolic pathways;Pentose and glucuronate interconversions;Ascorbate and aldarate metabolism;Biosynthesis of cofactors	C00800	HMDB0003290	neg	-	-	Metabolism;Metabolism;Metabolism;Metabolism	Global and overview maps;Carbohydrate metabolism;Carbohydrate metabolism;Global and overview maps	Organic acids and derivatives	Hydroxy acids and derivatives	233.009	M+K-2H	C6H12O7	4.3693	0.0093637	0	40.6	9.35322	526-97-6;20246-53-1	Medium-chain hydroxy acids and derivatives	3.4788	3.4274	3.3132	5.1069	5.1957	5.2135	3.6712	3.3137	3.4376	5.1435	5.1725	5.2962	4.7085	4.7121	4.7166
neg_3999	Sakebiose	metab_6306	-	-	-	C01518	HMDB0029882	neg	Carbohydrates	Oligosaccharides	-	-	Organic oxygen compounds	Organooxygen compounds	379.067	M+K-2H	C12H22O11	4.3614	0.00278533	0	66.3	6.27977	497-48-3	Carbohydrates and carbohydrate conjugates	4.7653	4.5603	4.582	5.4866	5.4493	5.5517	5.0137	5.088	4.9273	5.7538	5.9585	5.7361	5.2937	5.2941	5.2959
neg_4000	L-N-(1H-Indol-3-ylacetyl)aspartic acid	metab_6310	-	-	-	-	HMDB0038666	neg	-	-	-	-	Organic acids and derivatives	Carboxylic acids and derivatives	289.083	M-H	C14H14N2O5	4.3614	0.0054041	0	37.2	-0.532833	2456-73-7	Amino acids, peptides, and analogues	4.2453	4.3057	4.2797	4.622	4.618	5.0334	3.8674	3.8065	3.9084	4.2248	4.6192	4.8633	4.3728	4.3748	4.3775
neg_4001	7-Hydroxy-2-methyl-4-oxo-4H-1-benzopyran-5-carboxylic acid	metab_6311	-	-	-	-	HMDB0036346	neg	-	-	-	-	Organoheterocyclic compounds	Benzopyrans	219.029	M-H	C11H8O5	4.3614	0.0134048	0	41.7	-2.51569	-	1-benzopyrans	4.4324	4.4796	4.3709	3.4089	3.9159	3.7401	5.0386	4.9209	4.8046	4.1058	4.1692	4.2006	4.5194	4.5214	4.5303
neg_4013	Gentisin	metab_6324	-	-	-	C10066	HMDB0031760	neg	-	-	-	-	Organoheterocyclic compounds	Benzopyrans	303.051	M+FA-H	C14H10O5	4.3241	0.0078582	0	66.9	-0.799697	437-50-3	1-benzopyrans	5.6375	5.8182	5.5164	6.6954	7.3742	6.8421	5.1382	5.3723	5.0041	6.0823	6.5797	6.6467	6.5164	6.5222	6.5225
neg_4017	1,6-Bis-O-(3,4-dihydroxybenzoyl)-?-D-glucopyranose	metab_6328	-	-	-	-	-	neg	-	-	-	-	-	-	451.088	M-H	C20H20O12	4.2965	0.00701999	90.2	0	-0.258742	-	-	4.9322	5.0917	4.8157	4.4927	4.3769	4.6393	5.7483	5.8734	5.9502	5.3323	5.5751	5.301	5.4515	5.4461	5.4464
neg_4032	N-Acetylleucine	metab_6345	-	-	-	C02710	HMDB0011756	neg	-	-	-	-	Organic acids and derivatives	Carboxylic acids and derivatives	172.097	M-H	C8H15NO3	4.2345	0.00261352	67.9	0	-4.60402	1188-21-2	Amino acids, peptides, and analogues	4.2408	4.3181	4.2993	4.5658	4.5208	4.734	4.1168	4.124	4.1704	4.5853	4.493	4.5892	4.3297	4.3307	4.332
neg_4040	6-Feruloylglucose 2,3,4-trihydroxy-3-methylbutylglycoside	metab_6353	-	-	-	-	HMDB0036214	neg	-	-	-	-	Lipids and lipid-like molecules	Fatty Acyls	473.166	M-H	C21H30O12	4.1991	0.0235783	0	50.2	-0.493689	257939-69-8	Fatty acyl glycosides	4.9045	5.0158	4.6491	4.7864	3.7831	4.4636	4.8534	4.7788	4.7878	4.4793	4.3563	4.2463	4.7666	4.7488	4.7491
neg_4052	Glucorhein	metab_6366	-	-	-	-	HMDB0032877	neg	-	-	-	-	Benzenoids	Anthracenes	467.062	M+Na-2H	C21H18O11	4.1577	0.0144947	0	39.6	5.17634	34298-86-7	Anthracenecarboxylic acids and derivatives	3.6192	3.7125	3.2665	5.388	5.4219	5.4826	4.2597	4.4488	4.0652	5.2171	5.4523	5.2989	4.925	4.914	4.9143
neg_4059	Cucumopine	metab_6373	-	-	-	C08475	HMDB0301842	neg	-	-	-	-	Organic acids and derivatives	Carboxylic acids and derivatives	611.162	2M+FA-H	C11H13N3O6	4.1268	0.00392558	0	31.2	5.24965	110342-24-0	Amino acids, peptides, and analogues	6.1808	5.98	6.3057	5.9636	5.8926	6.0162	5.4436	5.5018	5.5869	4.9814	5.1807	4.6999	5.8782	5.8751	5.8754
neg_4061	S-Nitroglutathione	metab_6376	-	-	-	-	HMDB0257410	neg	-	-	-	-	Organic acids and derivatives	Carboxylic acids and derivatives	749.136	2M+FA-H	C10H16N4O8S	4.1198	0.0131581	0	50.9	0.433057	-	Amino acids, peptides, and analogues	6.6168	6.5937	6.5375	6.1725	6.2773	6.2674	6.5595	6.5166	6.3921	5.7572	6.013	5.8529	6.4522	6.4423	6.4424
neg_4071	2'-hydroxypseudobaptigenin	metab_6387	-	-	-	C03662	HMDB0304037	neg	-	-	-	-	Phenylpropanoids and polyketides	Isoflavonoids	313.035	M-H	C16H10O7	4.0889	0.0249473	0	43.6	-0.248554	-	Isoflav-2-enes	5.2244	4.9942	5.0104	4.501	4.5129	4.528	4.3201	4.5741	3.9263	3.393	3.7459	3.4204	4.7711	4.7897	4.7903
neg_4077	N-Phenylacetylaspartic acid	metab_6392	-	-	-	-	HMDB0029355	neg	-	-	-	-	Organic acids and derivatives	Carboxylic acids and derivatives	250.072	M-H	C12H13NO5	4.058	0.0132277	0	38.5	-1.27736	2752-32-1	Amino acids, peptides, and analogues	4.4024	4.4151	4.9795	4.6663	4.7613	4.7882	3.7857	3.6812	4.0492	4.4111	4.6218	4.4073	4.4663	4.4761	4.4764
neg_4082	Cndac	metab_6398	-	-	-	-	HMDB0250381	neg	-	-	-	-	Nucleosides, nucleotides, and analogues	Pyrimidine nucleosides	289.035	M+K-2H	C10H12N4O4	4.0423	0.0273125	0	39	3.01884	-	Pyrimidine 2''-deoxyribonucleosides	4.7493	5.0886	4.5453	5.3974	5.3656	5.5324	4.9466	5.0953	4.8433	5.3079	5.3869	5.3183	5.1366	5.1387	5.1579
neg_4085	Cyanidin 3-glucoside	metab_6401	-	map00942;map01110	Anthocyanin biosynthesis;Biosynthesis of secondary metabolites	C08604	HMDB0030684	neg	-	-	Metabolism;Metabolism	Biosynthesis of other secondary metabolites;Global and overview maps	Phenylpropanoids and polyketides	Flavonoids	943.215	2M+FA-H	C21H21O11+	4.0266	0.029465	0	43.7	0.343401	47705-70-4	Flavonoid glycosides	6.5903	6.4245	6.4223	5.9063	5.89	5.9913	5.8036	6.1566	5.5642	3.748	4.8421	4.136	6.1474	6.1504	6.1267
neg_4088	Bellidifolin	metab_6404	-	-	-	C10053	HMDB0248933	neg	-	-	-	-	Organoheterocyclic compounds	Benzopyrans	319.046	M+FA-H	C14H10O6	4.0266	0.00979106	0	76.3	-0.885433	2798-25-6	1-benzopyrans	6.1054	6.3591	5.8944	5.4353	5.2931	5.4891	5.7958	5.963	5.7831	4.594	4.7553	4.5601	5.8992	5.9065	5.9067
neg_4089	1h,8h-Pyrano[3,4-c]pyran-1,8-dione	metab_6405	-	-	-	-	HMDB0244906	neg	-	-	-	-	Organoheterocyclic compounds	Pyrans	209.009	M+FA-H	C8H4O4	4.0266	0.0138568	0	35.2	-3.80432	-	Pyranones and derivatives	4.2636	4.5383	4.032	3.4839	3.4124	3.6942	3.9746	4.1221	3.8384	2.819	3.5049	2.8464	4.0846	4.0949	4.0952
neg_4098	Tectorigenin	metab_6415	-	-	-	C10534	LMPK12050385;HMDB0042024;MJDBOTE0000251	neg	-	-	-	-	Phenylpropanoids and polyketides	Isoflavonoids	299.056	M-H	C16H12O6	3.9946	0.00428522	92	0	-0.619207	548-77-6	Isoflav-2-enes	6.4735	6.2628	6.274	5.8421	5.8832	5.9093	5.8004	5.9422	5.6273	4.804	5.0404	4.8733	6.1056	6.1087	6.1089
neg_4110	N-Feruloylaspartic acid	metab_6430	-	-	-	-	HMDB0040830	neg	-	-	-	-	Organic acids and derivatives	Carboxylic acids and derivatives	308.077	M-H	C14H15NO7	3.9633	0.0131263	0	64.3	-0.393952	135068-96-1	Amino acids, peptides, and analogues	4.4559	4.6954	4.2904	5.2735	4.569	4.7508	4.0741	3.768	4.041	4.7001	4.6958	4.937	4.5485	4.5398	4.5506
neg_4113	Chlorambucil	metab_6433	-	-	-	C06900	HMDB0014436	neg	-	-	-	-	Organic nitrogen compounds	Organonitrogen compounds	338.052	M+Cl	C14H19Cl2NO2	3.9476	0.00666409	0	41.4	9.72374	305-03-3	Nitrogen mustard compounds	4.2898	4.2955	4.3225	5.1748	5.2572	5.1793	4.2698	4.2376	4.2443	5.1334	5.2598	5.219	4.7409	4.7351	4.7376
neg_4131	7-Galloylcatechin	metab_6453	-	-	-	-	HMDB0037947	neg	-	-	-	-	Phenylpropanoids and polyketides	Flavonoids	441.083	M-H	C22H18O10	3.8902	0.00361194	0	56.6	-0.164641	89702-01-2	Flavans	5.2037	5.3535	5.375	4.7338	4.7739	4.8952	5.2834	5.4332	5.4867	4.488	4.6372	4.5333	5.2161	5.2187	5.2189
neg_4142	4-Acetoxyphenol	metab_6465	-	map01100	Metabolic pathways	C13636	HMDB0060390	neg	-	-	Metabolism	Global and overview maps	Benzenoids	Phenol esters	151.039	M-H	C8H8O3	3.8519	0.0103804	58.8	0	-5.90972	-	Not Available	3.6211	3.964	3.9682	4.7503	4.7351	4.7542	4.1256	4.0634	4.1197	5.1433	5.0385	5.1684	4.4163	4.425	4.4186
neg_4154	1,3-Bis(tetrahydro-2-furanyl)-5-fluoro-2,4-pyrimidinedione	metab_6478	-	-	-	-	HMDB0252180	neg	-	-	-	-	Organoheterocyclic compounds	Diazines	539.198	2M-H	C12H15FN2O4	3.7945	0.0179221	0	35.7	3.81235	-	Pyrimidines and pyrimidine derivatives	4.8305	3.6383	4.6884	3.4055	4.1851	3.8143	4.604	4.9301	5.3124	4.0263	4.3113	3.4318	4.6663	4.6528	4.6529
neg_4157	R-4'-phosphopantothenoyl-L-cysteine	metab_6481	-	-	-	-	HMDB0304473	neg	-	-	-	-	Organic acids and derivatives	Peptidomimetics	380.044	M-H2O-H	C12H20N2O9PS-3	3.7872	0.00844352	0	32.6	-1.25606	-	Hybrid peptides	4.8216	4.7554	5.1542	5.3409	5.1124	5.452	4.5007	4.1657	4.3891	5.0204	5.0759	5.2764	4.884	4.886	4.8911
neg_4174	Bisnoryangonin	metab_6498	-	-	-	C12085	HMDB0303165	neg	-	-	-	-	Benzenoids	Benzene and substituted derivatives	211.039	M-H2O-H	C13H10O4	3.7214	0.0244475	0	80.8	-2.94497	-	Styrenes	4.9456	4.7114	4.8145	4.1219	4.168	3.9643	4.5121	4.6857	4.0928	3.8998	3.8743	3.9273	4.5871	4.5892	4.6063
neg_4178	Luteolin	metab_6502	-	map01100;map00941;map01110;map00944	Metabolic pathways;Flavonoid biosynthesis;Biosynthesis of secondary metabolites;Flavone and flavonol biosynthesis	C01514	LMPK12110006;HMDB0005800;MJDBOTE0001048	neg	-	-	Metabolism;Metabolism;Metabolism;Metabolism	Global and overview maps;Biosynthesis of other secondary metabolites;Global and overview maps;Biosynthesis of other secondary metabolites	Phenylpropanoids and polyketides	Flavonoids	285.041	M-H	C15H10O6	3.7101	0.00488667	67.4	0	0.446875	491-70-3	Flavones	6.8587	6.7131	6.7798	6.4224	6.4651	6.4524	6.5477	6.7051	6.3038	5.7924	6.0237	5.872	6.6398	6.6434	6.6436
neg_4179	Aniracetam	metab_6503	-	-	-	C13355	HMDB0248441	neg	-	-	-	-	Benzenoids	Benzene and substituted derivatives	256.038	M+K-2H	C12H13NO3	3.7101	0.0177511	0	46.6	-2.49651	72432-10-1	Benzoic acids and derivatives	5.4898	5.3018	5.3539	4.8239	4.868	4.8358	5.1359	5.3278	4.7583	3.5671	4.2048	3.2054	5.2137	5.2016	5.216
neg_418	Hispiduloside	metab_6504	-	-	-	C17762	HMDB0302930	neg	-	-	-	-	Phenylpropanoids and polyketides	Flavonoids	483.093	M-H, M+Na-2H	C22H22O11	5.901	0.00348711	0	57.6	5.12916	-	Flavonoid glycosides	5.0449	5.1541	4.8423	5.5444	5.7581	5.5662	5.2482	5.0631	5.1801	5.4031	5.6965	5.6198	5.3884	5.3904	5.3874
neg_4180	4-Methylumbelliferyl acetate	metab_6505	-	-	-	C03837	HMDB0032989	neg	-	-	-	-	Phenylpropanoids and polyketides	Coumarins and derivatives	217.05	M-H	C12H10O4	3.7027	0.0342596	0	69.8	-2.82906	2747-05-09	Not Available	5.318	5.1237	5.2062	4.8103	4.8481	4.8199	4.949	5.1681	4.6677	3.6252	4.075	3.6531	5.0598	5.0431	5.0729
neg_4181	Vanilloyl glucose	metab_6506	-	-	-	C20470	HMDB0302470	neg	-	-	-	-	Phenylpropanoids and polyketides	Tannins	329.088	M-H	C14H18O9	3.7027	0.00340433	0	71.1	-0.780716	-	Hydrolyzable tannins	7.1692	6.9907	7.0753	6.6627	6.6971	6.6872	6.7961	6.9778	6.5283	6.0737	6.2863	6.1231	6.8937	6.8957	6.8965
neg_4184	2,3-Butanediol apiosylglucoside	metab_6509	-	-	-	-	HMDB0033063	neg	-	-	-	-	Organic oxygen compounds	Organooxygen compounds	421.114	M+K-2H	C15H28O11	3.6924	0.00487555	0	41.8	5.33285	-	Carbohydrates and carbohydrate conjugates	5.1039	4.9899	4.9039	4.09	4.0389	3.7429	4.5013	4.8354	4.0934	3.4033	3.2938	3.3829	4.6419	4.6439	4.6397
neg_4187	Luteolin 7-malonylglucoside	metab_6512	-	-	-	C10103	HMDB0301681	neg	-	-	-	-	Phenylpropanoids and polyketides	Flavonoids	533.092	M-H	C24H22O14	3.6846	0.01481	0	67.4	-2.95855	98767-38-5	Flavonoid glycosides	6.1437	6.1346	6.1395	5.9537	6.0066	5.9587	6.049	6.1576	5.7724	4.985	5.4123	5.15	6.1363	6.125	6.1254
neg_4190	Aesculin	metab_6516	-	-	-	C09264	HMDB0030820	neg	-	-	-	-	Phenylpropanoids and polyketides	Coumarins and derivatives	339.072	M-H	C15H16O9	3.6777	0.00853295	0	60.8	-0.926498	531-75-9	Coumarin glycosides	5.5982	5.4984	5.5067	5.0693	5.1034	5.0589	5.1936	5.4149	4.9982	3.9374	4.5509	4.3426	5.3491	5.3553	5.3556
neg_4196	Ideain	metab_6521	-	-	-	-	-	neg	-	-	-	-	-	-	505.052	M+Na-2H	C21H21ClO11	3.6639	0.0155904	91.8	0	0.150994	-	-	4.8913	5.3161	5.1961	5.4799	5.554	5.4883	5.4661	5.406	5.414	4.9602	5.1138	5.0384	5.4936	5.4957	5.5062
neg_4201	Cis-Coutaric acid	metab_6528	-	-	-	-	HMDB0034620	neg	-	-	-	-	Phenylpropanoids and polyketides	Cinnamic acids and derivatives	295.046	M-H	C13H12O8	3.6438	0.134134	0	37.2	-0.950471	67920-37-0	Hydroxycinnamic acids and derivatives	3.2769	3.0897	3.6238	4.7193	4.2605	4.4196	3.064	3.0319	3.2544	4.2177	4.5507	4.3722	3.7125	3.7158	3.8117
neg_4207	Asperuloside	metab_6534	-	map01110;map00902	Biosynthesis of secondary metabolites;Monoterpenoid biosynthesis	C09769	HMDB0248667	neg	-	-	Metabolism;Metabolism	Global and overview maps;Metabolism of terpenoids and polyketides	Organic oxygen compounds	Organooxygen compounds	395.098	M-H2O-H	C18H22O11	3.6089	0.00444247	0	60.6	-0.604923	14259-45-1	Carbohydrates and carbohydrate conjugates	3.312	3.3177	3.4386	5.2707	5.3154	5.2568	4.1811	4.2733	4.2706	5.3961	5.6222	5.4882	4.6935	4.6919	4.6957
neg_4219	Patuletin	metab_6546	-	-	-	C10118	LMPK12112986;HMDB0030802	neg	-	-	-	-	Phenylpropanoids and polyketides	Flavonoids	331.046	M-H	C16H12O8	3.5616	0.00745561	0	62	-0.551635	519-96-0	Flavones	4.3048	4.2572	4.195	5.1516	4.9733	5.3797	4.2583	4.3698	3.6726	4.8145	4.8407	4.7266	4.8812	4.8867	4.8869
neg_4236	2-(3,4-Dihydroxybenzoyloxy)-4,6-dihydroxybenzoate	metab_6565	-	-	-	C04524	HMDB0059651	neg	-	-	-	-	Phenylpropanoids and polyketides	Depsides and depsidones	287.02	M-H2O-H	C14H10O8	3.5049	0.0163818	0	56.4	-0.4228	-	Not Available	4.128	4.1337	4.1608	4.5937	4.8128	4.775	4.108	4.0759	4.0826	4.8118	5.1904	4.8229	4.1751	4.1884	4.1777
neg_429	3,4-Dihydroxyphenylglycol	metab_6624	-	map01100;map00350	Metabolic pathways;Tyrosine metabolism	C05576	HMDB0000318;PW_C000222	neg	-	-	Metabolism;Metabolism	Global and overview maps;Amino acid metabolism	Benzenoids	Phenols	151.039	M-H2O-H, M-H	C8H10O4	2.9897	0.00329615	71.8	0	-5.19412	3343-19-9;28822-73-3	Benzenediols	4.2999	4.4417	4.4655	4.9804	5.0719	5.013	4.366	4.3989	4.3236	4.9676	5.0004	5.0728	4.7268	4.7296	4.7276
neg_4295	Kojic acid	metab_6630	-	-	-	C14516	HMDB0032923;HMDB0258034	neg	-	-	-	-	Organoheterocyclic compounds	Pyrans	343.067	2M+Hac-H	C6H6O4	3.3255	0.0140357	0	50.6	-0.737863	501-30-4	Pyranones and derivatives	5.5173	5.2602	5.3309	4.2603	4.5074	4.5827	5.3871	5.5366	5.1903	4.5569	4.7094	4.0333	5.1279	5.1384	5.1386
neg_4304	6''-O-Acetylholocalin	metab_6641	-	-	-	-	HMDB0036331	neg	-	-	-	-	Organic oxygen compounds	Organooxygen compounds	352.104	M-H	C16H19NO8	3.3132	0.00555641	0	52	-0.615229	-	Carbohydrates and carbohydrate conjugates	4.8281	4.8284	4.6566	4.2261	4.4956	4.4478	3.705	3.533	3.9294	3.1433	3.1178	3.1707	4.5127	4.5175	4.515
neg_4341	Irisxanthone	metab_6681	-	-	-	C10067	-	neg	-	-	-	-	-	-	435.093	M-H	C20H20O11	3.2702	0.0081297	57.1	0	-0.444991	51419-56-8	-	5.117	4.9723	5.0663	4.0919	4.1029	4.2358	5.3684	5.3288	5.1019	3.9634	3.7848	3.6606	4.9835	4.9857	4.9904
neg_4356	Methyl 6-O-galloyl-beta-D-glucopyranoside	metab_6697	-	-	-	-	HMDB0039354	neg	-	-	-	-	Benzenoids	Benzene and substituted derivatives	367.067	M+Na-2H	C14H18O10	3.234	0.015082	0	58.8	5.85185	88647-06-7	Benzoic acids and derivatives	5.8314	5.6303	5.7141	5.4075	5.5686	5.5807	6.2479	6.2129	5.9575	5.7719	5.6784	5.7089	5.847	5.8582	5.8585
neg_4357	Guanidoacetic acid	metab_6698	-	map01100;map00330;map00260	Metabolic pathways;Arginine and proline metabolism;Glycine, serine and threonine metabolism	C00581	HMDB0000128;PW_C000083	neg	-	-	Metabolism;Metabolism;Metabolism	Global and overview maps;Amino acid metabolism;Amino acid metabolism	Organic acids and derivatives	Carboxylic acids and derivatives	233.103	2M-H	C3H7N3O2	3.234	0.0113028	0	39	9.64244	352-97-6	Amino acids, peptides, and analogues	4.3207	4.1494	4.304	4.6127	4.2977	4.467	4.4247	4.3827	4.22	4.8245	4.6252	4.8214	4.4371	4.4299	4.4394
neg_4373	Maclurin	metab_6716	-	-	-	C09951	HMDB0032644	neg	-	-	-	-	Benzenoids	Benzene and substituted derivatives	583.109	2M+Hac-H	C13H10O6	3.1842	0.0586277	0	40.2	0.282823	519-34-6	Benzophenones	5.4324	5.3479	5.1349	4.1829	4.5858	4.4474	4.5002	5.078	4.7191	4.1818	4.1563	4.2093	4.9425	4.9446	4.8987
neg_4374	Aurin	metab_6717	-	-	-	C14213	HMDB0248730	neg	-	-	-	-	Benzenoids	Benzene and substituted derivatives	311.071	M+Na-2H	C19H14O3	3.1842	0.00601902	0	36.4	5.90034	603-45-2	Diphenylmethanes	2.3686	2.5282	2.1723	5.2154	5.2503	5.147	2.7182	2.8922	2.9276	5.21	5.3264	5.162	4.6602	4.6622	4.6654
neg_4377	Rosuvastatin 5 S-lactone	metab_6720	-	-	-	-	HMDB0060941	neg	-	-	-	-	Organoheterocyclic compounds	Diazines	500.105	M+K-2H	C22H26FN3O5S	3.1793	0.0131138	0	48.4	-3.43373	-	Pyrimidines and pyrimidine derivatives	5.3633	5.2956	5.4711	4.9291	4.7526	4.8514	4.5472	4.9367	4.8901	3.3742	3.7448	3.4017	5.016	5.0258	5.026
neg_4396	Paeonol	metab_6741	-	-	-	C10712	HMDB0256081;MJDBOTE0001333	neg	-	-	-	-	Organic oxygen compounds	Organooxygen compounds	211.061	M+FA-H	C9H10O3	3.1398	0.00539415	0	43.9	-3.91605	552-41-0	Carbonyl compounds	4.4303	4.3619	4.4162	3.9537	4.2372	4.3992	4.411	4.5233	4.321	4.0856	4.1086	3.9513	4.3322	4.3361	4.3364
neg_4401	Furaneol (keto form)	metab_6748	-	-	-	-	HMDB0304357	neg	-	-	-	-	Organoheterocyclic compounds	Dihydrofurans	108.021	M-H2O-H	C6H7O3-	3.1398	0.00970266	0	43.6	-7.75475	-	Furanones	4.4704	4.4254	4.4998	5.0755	5.166	5.2057	4.2324	4.4329	4.1669	5.2022	5.3003	5.2433	4.8437	4.8457	4.8517
neg_4408	Racemethionine	metab_6755	-	-	-	C01733	HMDB0033951	neg	-	-	-	-	Organic acids and derivatives	Carboxylic acids and derivatives	343.103	2M+FA-H	C5H11NO2S	3.1182	0.0059057	0	32.9	9.87592	59-51-8	Amino acids, peptides, and analogues	3.9106	3.9299	4.1751	6.0822	6.1621	6.1942	3.5538	3.7528	3.6119	5.8144	5.9935	5.8178	5.547	5.5522	5.5493
neg_4429	Deoxyloganic acid	metab_6777	-	-	-	C11647	HMDB0037028	neg	-	-	-	-	Lipids and lipid-like molecules	Prenol lipids	405.141	M+FA-H	C16H24O9	3.0807	0.0202187	0	45.7	3.11398	92842-56-3	Terpene glycosides	4.5861	4.6317	4.5158	5.8547	5.7908	5.8478	4.333	4.5018	4.4643	5.8676	5.7911	5.8204	5.3721	5.3873	5.3875
neg_4436	4-Hydroxyphenylacetic acid sulfate	metab_6785	-	-	-	-	HMDB0304906	neg	-	-	-	-	Benzenoids	Phenols	230.996	M-H	C8H8O6S	3.0693	0.0142621	0	44	-1.91177	-	1-hydroxy-2-unsubstituted benzenoids	3.2737	3.2412	3.9541	4.7299	4.2236	4.2459	2.6108	2.9379	3.6319	4.8662	4.7457	4.899	4.249	4.2586	4.2607
neg_4452	2,4-Quinolinediol	metab_6803	-	map00996	Biosynthesis of various alkaloids	C16716	HMDB0245468	neg	-	-	Metabolism	Biosynthesis of other secondary metabolites	Organoheterocyclic compounds	Quinolines and derivatives	160.04	M-H	C9H7NO2	3.0258	0.0135058	0	33.4	-5.35796	-	Quinolones and derivatives	4.5795	4.1119	4.3979	4.5568	4.8046	5.2156	4.0676	4.074	4.0081	4.462	4.4687	4.6297	4.4952	4.4971	4.5061
neg_4495	Methotrexate	metab_6850	-	-	-	C01937	PW_C009057;HMDB0248287;HMDB0014703;MJDBOTE0000857	neg	-	-	-	-	Organoheterocyclic compounds	Triazines	475.146	M+Na-2H	C20H22N8O5	2.9038	0.0115968	0	30.6	-0.894699	1959-05-02	1,3,5-triazines	4.4967	4.5898	4.8137	5.6476	5.6986	5.7752	3.9584	4.5364	4.501	5.1069	5.2128	4.9213	5.0657	5.057	5.0571
neg_4501	3-Acetylphenol sulfate	metab_6858	-	-	-	-	HMDB0304930	neg	-	-	-	-	Organic oxygen compounds	Organooxygen compounds	261.007	M+FA-H	C8H8O5S	2.8928	0.0168525	0	36.8	-0.988524	-	Carbonyl compounds	4.3771	4.6907	4.763	5.182	4.9135	4.8921	4.5773	4.4882	4.5377	5.2675	5.3041	5.3297	4.871	4.8844	4.8829
neg_4511	N-Acetyl-L-Tyrosine	metab_6869	-	-	-	C01657	HMDB0000866;HMDB0244966;MJDBOTE0000672	neg	-	-	-	-	Organic acids and derivatives	Carboxylic acids and derivatives	222.077	M-H	C11H13NO4	2.8543	0.0191552	32.6	0	-2.37897	537-55-3	Amino acids, peptides, and analogues	4.8239	4.889	4.7679	5.4554	5.0363	5.1232	4.9448	4.8254	4.958	5.3874	5.3536	5.6211	5.0737	5.0762	5.0891
neg_4515	Buformin	metab_6873	-	-	-	C07674	HMDB0249431	neg	-	-	-	-	Organic nitrogen compounds	Organonitrogen compounds	194.082	M+K-2H	C6H15N5	2.8396	0.0153809	0	53.9	1.67239	692-13-7	Guanidines	4.1796	4.1438	4.0869	4.2943	4.558	4.9401	4.1528	4.021	4.0742	4.6743	4.687	4.8428	4.3222	4.3243	4.3346
neg_4524	Fenamiphos	metab_6883	-	-	-	C18659	HMDB0031787	neg	-	-	-	-	Benzenoids	Benzene and substituted derivatives	605.206	2M-H	C13H22NO3PS	2.816	0.0390114	0	44.9	1.97238	22224-92-6	Phenoxy compounds	4.8496	5.1381	4.904	4.6164	4.2968	4.0536	5.668	5.5807	5.768	5.3257	5.1327	5.2444	5.2465	5.2484	5.2765
neg_4557	Tyrosyl-Glutamate	metab_6919	-	-	-	-	HMDB0029104	neg	-	-	-	-	Organic acids and derivatives	Carboxylic acids and derivatives	331.093	M+Na-2H	C14H18N2O6	2.8082	0.00905931	0	46.7	6.42735	-	Amino acids, peptides, and analogues	4.8252	4.8651	4.953	5.577	5.6581	5.6625	4.2048	4.257	4.5545	5.3818	5.5381	5.4041	5.1108	5.1175	5.1178
neg_4560	Arborinine	metab_6923	-	-	-	C10643	HMDB0030177	neg	-	-	-	-	Organoheterocyclic compounds	Quinolines and derivatives	306.076	M+Na-2H	C16H15NO4	2.8082	0.0257331	0	33.8	5.24291	5489-57-6	Benzoquinolines	3.6528	3.9423	3.7329	5.0725	5.0761	5.1684	2.743	3.271	3.2661	4.7605	4.9216	4.7691	4.5052	4.5074	4.5254
neg_4562	(2R,3S)-2,3-dimethylmalate	metab_6925	-	map00760	Nicotinate and nicotinamide metabolism	C03652	HMDB0303969	neg	-	-	Metabolism	Metabolism of cofactors and vitamins	Lipids and lipid-like molecules	Fatty Acyls	205.035	M+FA-H	C6H8O5-2	2.8082	0.0176242	0	30.6	-3.9196	-	Fatty acids and conjugates	4.9668	5.0147	5.1462	5.3704	5.4624	5.4868	4.611	4.6551	4.5684	5.0284	5.0957	5.0976	5.0589	5.0722	5.0723
neg_4566	Ethyl maltol	metab_6929	-	-	-	C20362	HMDB0031735	neg	-	-	-	-	Organoheterocyclic compounds	Pyrans	139.039	M-H	C7H8O3	2.8082	0.0119459	0	39.5	-6.7287	4940-11-08	Pyranones and derivatives	4.3224	4.2706	4.2598	4.9367	4.9988	5.009	4.1838	4.0819	4.0365	4.8911	4.9872	4.9939	4.5931	4.595	4.6028
neg_4641	4-Acetyl-2(3H)-benzoxazolone	metab_7013	-	-	-	-	HMDB0040612	neg	-	-	-	-	Organoheterocyclic compounds	Benzoxazoles	222.04	M+FA-H	C9H7NO3	2.1353	0.00342184	0	37.6	-3.15403	70735-79-4	Benzoxazolones	6.211	6.0567	6.2289	6.4965	6.5826	6.7648	6.0093	5.9572	5.777	6.4892	6.359	6.6517	6.269	6.2718	6.2713
neg_4684	UDP-N-acetyl-alpha-D-glucosamine	metab_7056	-	map01100;map00520;map01250;map00524;map00563	Metabolic pathways;Amino sugar and nucleotide sugar metabolism;Biosynthesis of nucleotide sugars;Neomycin, kanamycin and gentamicin biosynthesis;Glycosylphosphatidylinositol (GPI)-anchor biosynthesis	C00043	HMDB0304526	neg	-	-	Metabolism;Metabolism;Metabolism;Metabolism;Metabolism	Global and overview maps;Carbohydrate metabolism;Global and overview maps;Biosynthesis of other secondary metabolites;Glycan biosynthesis and metabolism	Nucleosides, nucleotides, and analogues	Pyrimidine nucleotides	586.047	M-H2O-H	C17H25N3O17P2-2	1.4216	0.0863127	0	34.5	-1.06338	528-04-1	Pyrimidine nucleotide sugars	4.7184	4.9573	4.5378	4.9983	4.8709	4.8675	4.4394	4.5651	3.9572	4.8321	4.9253	4.8338	4.9323	4.8688	4.8688
neg_4685	2-Furoic Acid	metab_7057	-	map01100	Metabolic pathways	C01546	HMDB0000617;MJDBOTE0000456	neg	-	-	Metabolism	Global and overview maps	Organoheterocyclic compounds	Furans	111.008	M-H	C5H4O3	1.4143	0.00849208	64.3	0	-8.96474	88-14-2	Furoic acid and derivatives	6.3064	6.4548	6.411	6.7938	6.8137	6.7817	6.2228	6.1728	5.9035	6.6512	6.6136	6.6918	6.4642	6.4693	6.4713
neg_4687	Citric Acid	metab_7059	-	map01100;map00630;map01110;map01240;map01210;map01200;map01230;map00250;map00020	Metabolic pathways;Glyoxylate and dicarboxylate metabolism;Biosynthesis of secondary metabolites;Biosynthesis of cofactors;2-Oxocarboxylic acid metabolism;Carbon metabolism;Biosynthesis of amino acids;Alanine, aspartate and glutamate metabolism;Citrate cycle (TCA cycle)	C00158	HMDB0000094;PW_C000063;MJDBNL00000139	neg	Organic acids	Carboxylic acids	Metabolism;Metabolism;Metabolism;Metabolism;Metabolism;Metabolism;Metabolism;Metabolism;Metabolism	Global and overview maps;Carbohydrate metabolism;Global and overview maps;Global and overview maps;Global and overview maps;Global and overview maps;Global and overview maps;Amino acid metabolism;Carbohydrate metabolism	Organic acids and derivatives	Carboxylic acids and derivatives	191.019	M-H	C6H8O7	1.3987	0.0213095	91.9	0	-3.99709	77-92-9	Tricarboxylic acids and derivatives	7.736	7.8874	7.8274	8.1713	8.1959	8.1513	7.6761	7.6267	7.3509	8.0765	8.0329	8.1117	7.8859	7.9019	7.9021
neg_4690	Filgotinib	metab_7062	-	-	-	-	HMDB0252256	neg	-	-	-	-	Organoheterocyclic compounds	Pyridines and derivatives	470.151	M+FA-H	C21H23N5O3S	1.3699	0.00701523	0	41.5	2.1179	-	Phenylpyridines	5.8726	6.0467	6.1385	6.3612	6.1514	6.1478	5.6605	5.7142	5.8556	6.289	6.2441	6.0696	6.1351	6.1412	6.1374
neg_4707	Uridine-5'-Monophosphate	metab_7079	-	map00240;map01100;map01232;map01240	Pyrimidine metabolism;Metabolic pathways;Nucleotide metabolism;Biosynthesis of cofactors	C00105	HMDB0000288;MJDBOTE0000717	neg	Nucleic acids	Nucleotides	Metabolism;Metabolism;Metabolism;Metabolism	Nucleotide metabolism;Global and overview maps;Global and overview maps;Global and overview maps	Nucleosides, nucleotides, and analogues	Pyrimidine nucleotides	323.028	M-H	C9H13N2O9P	1.2011	0.107144	74.4	0	-0.731145	58-97-9	Pyrimidine ribonucleotides	3.7093	3.5437	4.0973	5.7246	5.9422	5.9242	3.4133	3.3811	3.3878	5.1071	5.5496	5.1083	4.8253	4.9108	4.8415
neg_4724	(2S)-2-[[5-[2-[(6S)-2-Amino-4-oxo-1,6,7,8-tetrahydropyrimido[5,4-b][1,4]thiazin-6-yl]ethyl]thiophene-2-carbonyl]amino]pentanedioic acid	metab_7097	-	-	-	-	HMDB0248055	neg	-	-	-	-	Organic acids and derivatives	Carboxylic acids and derivatives	488.066	M+Na-2H	C18H21N5O6S2	1.1153	0.0163079	0	34	-4.27195	-	Amino acids, peptides, and analogues	5.6996	5.6186	5.4714	6.046	6.1747	6.0508	5.7654	5.6747	5.6006	6.1363	6.0588	6.1728	5.844	5.8309	5.8423
neg_4727	Fumaric acid	metab_7099	-	map01100;map00220;map01110;map00350;map00650;map01200;map00620;map00760;map00250;map00360;map00020;map00190	Metabolic pathways;Arginine biosynthesis;Biosynthesis of secondary metabolites;Tyrosine metabolism;Butanoate metabolism;Carbon metabolism;Pyruvate metabolism;Nicotinate and nicotinamide metabolism;Alanine, aspartate and glutamate metabolism;Phenylalanine metabolism;Citrate cycle (TCA cycle);Oxidative phosphorylation	C00122	HMDB0000134;PW_C000088	neg	-	-	Metabolism;Metabolism;Metabolism;Metabolism;Metabolism;Metabolism;Metabolism;Metabolism;Metabolism;Metabolism;Metabolism;Metabolism	Global and overview maps;Amino acid metabolism;Global and overview maps;Amino acid metabolism;Carbohydrate metabolism;Global and overview maps;Carbohydrate metabolism;Metabolism of cofactors and vitamins;Amino acid metabolism;Amino acid metabolism;Carbohydrate metabolism;Energy metabolism	Organic acids and derivatives	Carboxylic acids and derivatives	115.003	M-H	C4H4O4	1.1076	0.068181	53.6	0	-8.64057	110-17-8	Dicarboxylic acids and derivatives	4.1482	4.0306	4.4734	4.8583	4.8398	4.8253	3.8076	3.8629	3.6189	4.5574	4.4667	4.7182	4.2468	4.2546	4.1989
neg_4728	Gamma-Glutamylglutamine	metab_7100	-	-	-	C05283	HMDB0011738;HMDB0029147	neg	-	-	-	-	Organic acids and derivatives	Carboxylic acids and derivatives	274.104	M-H	C10H17N3O6	1.0919	0.0156846	67.2	0	-0.410951	10148-81-9;1466-50-8	Amino acids, peptides, and analogues	5.2481	5.3071	5.6	5.9082	5.4817	5.7598	3.7997	4.0434	3.7742	5.6802	5.0031	5.3669	5.2947	5.2973	5.3076
neg_4737	Erythro-4-hydroxy-L-glutamate(1-)	metab_7109	-	-	-	C03079	HMDB0062752	neg	-	-	-	-	Organic acids and derivatives	Carboxylic acids and derivatives	144.029	M-H2O-H	C5H9NO5	1.0529	0.0332103	0	41.2	-5.67856	-	Amino acids, peptides, and analogues	5.0174	4.9718	5.326	5.5247	5.4787	5.7684	4.3988	4.5068	4.134	5.3397	5.3136	5.3337	5.1262	5.1283	5.152
neg_4745	3-Oxoadipic acid	metab_7115	-	map01100	Metabolic pathways	C00846	HMDB0000398	neg	-	-	Metabolism	Global and overview maps	Organic acids and derivatives	Keto acids and derivatives	205.035	M+FA-H	C6H8O5	0.9905	0.0375027	0	40.3	-4.13042	689-31-6	Medium-chain keto acids and derivatives	3.8932	4.0633	4.3941	5.2948	5.2368	5.3307	3.5614	3.0607	3.0673	5.3429	5.4167	5.4179	4.7075	4.7363	4.7358
neg_4759	D-Galactaric acid	metab_7127	-	map01100;map00053	Metabolic pathways;Ascorbate and aldarate metabolism	C00879	HMDB0000639	neg	-	-	Metabolism;Metabolism	Global and overview maps;Carbohydrate metabolism	Organic oxygen compounds	Organooxygen compounds	209.03	M-H	C6H10O8	0.9359	0.0511406	85.1	0	-3.03741	526-99-8	Carbohydrates and carbohydrate conjugates	3.3435	3.3493	4.0187	5.2273	5.3975	5.7531	3.3236	3.2914	3.2981	5.0638	5.2974	5.0267	4.8104	4.7717	4.7732
neg_4760	6'''-O-Sinapoylsaponarin	metab_7129	-	-	-	-	HMDB0035005	neg	-	-	-	-	Phenylpropanoids and polyketides	Flavonoids	781.202	M-H2O-H	C38H40O19	0.9204	0.0134858	0	81.6	4.619	-	Flavonoid glycosides	6.5821	6.3307	6.6238	6.8294	6.7258	6.8609	6.1963	6.1564	6.2524	6.8676	6.8409	6.8933	6.6581	6.6602	6.6491
neg_4766	6-[[2-[[2-Amino-4-(methylamino)-4-oxobutanoyl]amino]-2-(4-hydroxyphenyl)acetyl]amino]-3,3-dimethyl-7-oxo-4-thia-1-azabicyclo[3.2.0]heptane-2-carboxylic acid	metab_7132	-	-	-	-	HMDB0248670	neg	-	-	-	-	Organic acids and derivatives	Carboxylic acids and derivatives	474.147	M-H2O-H	C21H27N5O7S	0.9126	0.0234182	0	53.3	3.16226	-	Amino acids, peptides, and analogues	5.717	5.6652	5.7464	6.348	6.2033	6.1105	5.6337	5.6901	5.7461	6.2427	6.2625	6.1592	5.9667	5.9493	5.9492
neg_4775	Gluconic Acid	metab_7141	-	map01100;map00030;map01110;map01200	Metabolic pathways;Pentose phosphate pathway;Biosynthesis of secondary metabolites;Carbon metabolism	C00257	HMDB0000625;HMDB0303730;MJDBOTE0001669	neg	Carbohydrates	Monosaccharides	Metabolism;Metabolism;Metabolism;Metabolism	Global and overview maps;Carbohydrate metabolism;Global and overview maps;Global and overview maps	Organic oxygen compounds	Organooxygen compounds	195.05	M-H	C6H12O7	0.897	0.0142316	91.6	0	-3.58617	526-95-4	Carbohydrates and carbohydrate conjugates	6.5266	6.2541	6.7358	6.7669	6.826	6.9188	6.0638	6.0353	6.1385	6.6733	6.8089	6.6892	6.5339	6.5359	6.5454
neg_4785	Trehalose 6-Phosphate	metab_7150	-	map01100;map00500;map01110	Metabolic pathways;Starch and sucrose metabolism;Biosynthesis of secondary metabolites	C00689	HMDB0001124	neg	-	-	Metabolism;Metabolism;Metabolism	Global and overview maps;Carbohydrate metabolism;Global and overview maps	Organic oxygen compounds	Organooxygen compounds	421.075	M-H	C12H23O14P	0.8736	0.0223213	82.8	0	-0.125447	4484-88-2	Carbohydrates and carbohydrate conjugates	5.7213	5.6788	5.6789	6.105	6.163	6.2264	5.3271	5.5438	5.4548	6.239	6.2775	6.12	5.847	5.866	5.8538
neg_4788	Garciduol C	metab_7153	-	-	-	-	HMDB0030279	neg	-	-	-	-	Organoheterocyclic compounds	Indoles and derivatives	523.047	M+K-2H	C27H18O9	0.8658	0.0471194	0	52.9	7.42903	182127-82-8	Pyrroloindoles	4.7369	4.3291	4.8498	5.4604	5.5223	5.783	4.346	4.1938	4.3151	5.4384	5.3458	5.6232	4.8834	4.8484	4.8484
neg_4795	Glycerophosphoinositol	metab_7161	-	-	-	C01225	HMDB0011649	neg	-	-	-	-	Lipids and lipid-like molecules	Glycerophospholipids	333.059	M-H	C9H19O11P	0.8658	0.0100777	0	46.1	-0.332795	129830-95-1	Glycerophosphoinositols	5.3405	5.3277	5.4261	5.5269	5.4861	5.8565	5.2762	5.2441	5.3085	5.8382	5.5088	5.6713	5.44	5.4474	5.4477
neg_4886	2-Oxoarginine	metab_7262	-	map01100;map00470;map00330	Metabolic pathways;D-Amino acid metabolism;Arginine and proline metabolism	C03771	PW_C002094;HMDB0004225	neg	-	-	Metabolism;Metabolism;Metabolism	Global and overview maps;Metabolism of other amino acids;Amino acid metabolism	Organic acids and derivatives	Keto acids and derivatives	154.061	M-H2O-H	C6H11N3O3	0.8261	0.0209753	0	34.3	-4.89505	3715-10-04	Short-chain keto acids and derivatives	4.5592	4.7487	4.6455	5.0083	4.9087	5.0543	4.8317	4.9616	4.6489	5.27	5.2513	5.1954	4.8831	4.8851	4.8997
neg_491	Safflomin A	metab_7289	-	-	-	-	HMDB0040677;HMDB0030558	neg	-	-	-	-	Phenylpropanoids and polyketides	Cinnamic acids and derivatives	593.151	M-H2O-H, M-H	C27H32O16	3.7582	0.0191856	0	38.6	0.312721	146087-19-6;78281-02-4	Hydroxycinnamic acids and derivatives	7.2699	7.1924	7.4369	7.1119	7.106	7.1154	6.5259	6.7316	6.5532	6.0491	6.244	6.0664	7.0734	7.0589	7.0591
neg_537	Eriodictyol 7-(6-galloylglucoside)	metab_7498	-	-	-	-	HMDB0039921	neg	-	-	-	-	Phenylpropanoids and polyketides	Flavonoids	583.109	M-H2O-H, M-H	C28H26O15	4.504	0.00519495	0	46.3	0.221421	-	Flavonoid glycosides	5.9541	6.0654	5.8656	5.6689	5.6467	5.7189	6.1765	6.1881	6.0931	5.3747	5.6445	5.4478	5.9398	5.9417	5.9372
neg_577	1,2-Diferuloylgentiobiose	metab_7542	-	-	-	-	HMDB0301720	neg	-	-	-	-	Phenylpropanoids and polyketides	Cinnamic acids and derivatives	693.204	M-H, M+Cl	C32H38O17	5.1385	0.0115807	0	71.2	0.921502	-	Hydroxycinnamic acids and derivatives	5.863	5.9559	5.9486	5.604	4.5342	5.1881	6.2073	6.074	5.985	5.6304	5.64	5.6955	5.8994	5.9015	5.8919
neg_58	Ginnalin B	metab_7545	-	-	-	-	HMDB0252723	neg	-	-	-	-	Benzenoids	Benzene and substituted derivatives	315.072	M-H, M+Cl, M+FA-H	C13H16O9	3.484	0.0195143	0	56.1	-0.371249	-	Benzoic acids and derivatives	5.915	6.2023	5.7922	6.272	6.4115	6.4646	5.3936	5.5875	5.7167	6.2661	6.1507	6.1954	6.0489	6.0635	6.0638
neg_580	Xanthotoxol glucoside	metab_7546	-	-	-	-	HMDB0038626	neg	-	-	-	-	Phenylpropanoids and polyketides	Coumarins and derivatives	363.072	M-H2O-H, M-H	C17H16O9	5.1958	0.0137936	0	61.2	-0.286742	-	Coumarin glycosides	5.3238	5.4729	5.3461	3.9503	3.9911	4.3581	5.851	5.8606	5.6677	4.6476	4.0108	4.64	5.4173	5.4276	5.4279
neg_582	Phlorizin	metab_7548	-	map00941;map01110	Flavonoid biosynthesis;Biosynthesis of secondary metabolites	C01604	HMDB0036634	neg	-	-	Metabolism;Metabolism	Biosynthesis of other secondary metabolites;Global and overview maps	Phenylpropanoids and polyketides	Flavonoids	435.129	M-H2O-H, M-H	C21H24O10	5.1958	0.0073778	0	62.9	-0.403055	60-81-1	Flavonoid glycosides	6.7628	6.6177	6.6526	6.359	6.3349	6.4083	5.8423	6.1356	5.8573	5.3981	5.5353	5.3866	6.3643	6.3697	6.3699
neg_6	2-Feruloyl-1-sinapoylgentiobiose	metab_7567	-	-	-	-	HMDB0030334	neg	-	-	-	-	Phenylpropanoids and polyketides	Cinnamic acids and derivatives	723.215	M-H, M+Cl, M+FA-H, M+Na-2H	C33H40O18	5.0043	0.00878237	0	74	1.07428	-	Hydroxycinnamic acids and derivatives	6.8176	6.8708	6.8339	6.5098	5.7434	6.2065	7.0159	6.9429	6.8894	6.5022	6.4958	6.5525	6.7728	6.7663	6.7662
neg_7	Homoplantaginin	metab_7678	-	-	-	C17762	-	neg	-	-	-	-	-	-	461.109	M+Cl, M+FA-H, 2M-H, M-H	C22H22O11	3.9868	0.00135551	61.2	0	-0.130939	-	-	7.7117	7.4963	7.5077	7.0697	7.1233	7.1451	7.0244	7.1606	6.8635	6.1757	6.3751	6.2527	7.3403	7.3391	7.3394
neg_780	Pentose	metab_7767	-	-	-	C08348	HMDB0250736;HMDB0003402;MJDBOTE0001676	neg	-	-	-	-	Organic oxygen compounds	Organooxygen compounds	149.045	M-H	C5H10O5	1.006	0.00861657	54.2	0	-6.20579	9000-69-5	Carbohydrates and carbohydrate conjugates	5.2842	5.3435	5.7031	5.5514	5.4923	5.6411	4.6408	4.721	4.7461	5.2078	5.1542	5.3775	5.3199	5.326	5.3268
neg_802	D-Xylono-1,5-lactone	metab_7785	-	map01100;map00040	Metabolic pathways;Pentose and glucuronate interconversions	C02266	HMDB0011676	neg	-	-	Metabolism;Metabolism	Global and overview maps;Carbohydrate metabolism	Organoheterocyclic compounds	Lactones	295.067	2M-H	C5H8O5	1.1622	0.0274118	0	37.7	-0.786431	-	Delta valerolactones	4.0667	4.0724	4.5396	5.463	5.1885	5.2427	4.0467	4.0145	4.0212	5.513	5.1244	5.2248	4.4107	4.4338	4.4279
neg_814	Adenosine 5'-Monophosphate	metab_7797	-	map01100;map01110;map00230;map01240;map00908;map01232	Metabolic pathways;Biosynthesis of secondary metabolites;Purine metabolism;Biosynthesis of cofactors;Zeatin biosynthesis;Nucleotide metabolism	C00020	HMDB0000045;MJDBOTE0000497	neg	Nucleic acids	Nucleotides	Metabolism;Metabolism;Metabolism;Metabolism;Metabolism;Metabolism	Global and overview maps;Global and overview maps;Nucleotide metabolism;Global and overview maps;Metabolism of terpenoids and polyketides;Global and overview maps	Nucleosides, nucleotides, and analogues	Purine nucleotides	346.055	M-H	C10H14N5O7P	1.2636	0.0476703	66.9	0	-1.35649	61-19-8	Purine ribonucleotides	4.1526	3.8398	3.7683	4.6067	5.16	4.9432	3.7156	4.0088	3.6901	4.6864	5.024	4.7313	4.5096	4.4773	4.4717
neg_815	4-Aminophenylmannoside	metab_7798	-	-	-	-	HMDB0246178	neg	-	-	-	-	Organic oxygen compounds	Organooxygen compounds	306.076	M+Cl	C12H17NO6	1.2791	0.0233988	0	30.9	5.03464	-	Carbohydrates and carbohydrate conjugates	4.9018	4.9076	4.9346	5.6839	5.9558	5.715	4.8819	4.8497	4.8564	5.6243	5.9939	5.7802	5.1773	5.1608	5.1795
neg_822	Citramalic Acid	metab_7805	-	-	-	C00815	HMDB0000426	neg	-	-	-	-	Lipids and lipid-like molecules	Fatty Acyls	147.029	M-H	C5H8O5	1.3327	0.0310363	83.9	0	-6.23625	2306-22-1;597-44-4	Fatty acids and conjugates	4.3749	4.4519	4.6669	4.8943	4.8574	4.9247	4.2307	4.2433	4.1961	4.7557	4.6472	4.8399	4.5466	4.5701	4.5702
neg_839	L-4-Hydroxyglutamate semialdehyde	metab_7821	-	map01100;map00330	Metabolic pathways;Arginine and proline metabolism	C05938	PW_C002808;HMDB0006556	neg	-	-	Metabolism;Metabolism	Global and overview maps;Amino acid metabolism	Organic acids and derivatives	Carboxylic acids and derivatives	128.034	M-H2O-H	C5H9NO4	1.5149	0.0131409	0	44.7	-6.54569	-	Amino acids, peptides, and analogues	5.9492	6.0892	6.1998	6.5844	6.5603	6.5988	5.8566	5.8501	5.8828	6.5117	6.4495	6.4778	6.2182	6.228	6.2282
neg_845	Trans-Aconitic Acid	metab_7827	-	map01100;map00660	Metabolic pathways;C5-Branched dibasic acid metabolism	C02341	HMDB0000958;MJDBOTE0001106	neg	Organic acids	Carboxylic acids	Metabolism;Metabolism	Global and overview maps;Carbohydrate metabolism	Organic acids and derivatives	Carboxylic acids and derivatives	173.008	M-H	C6H6O6	1.5813	0.0104395	80	0	-4.60059	4023-65-8	Tricarboxylic acids and derivatives	6.3968	6.4861	6.7323	7.0978	7.13	7.1166	6.053	5.8961	5.716	6.8141	6.8888	6.9778	6.6641	6.6719	6.6721
neg_849	N-Acetyl-L-Glutamic Acid	metab_7831	-	map01100;map01210;map00220;map01110;map01230	Metabolic pathways;2-Oxocarboxylic acid metabolism;Arginine biosynthesis;Biosynthesis of secondary metabolites;Biosynthesis of amino acids	C00624	HMDB0001138;MJDBOTE0000638	neg	-	-	Metabolism;Metabolism;Metabolism;Metabolism;Metabolism	Global and overview maps;Global and overview maps;Amino acid metabolism;Global and overview maps;Global and overview maps	Organic acids and derivatives	Carboxylic acids and derivatives	188.056	M-H	C7H11NO5	1.6572	0.00875692	59.8	0	-3.67656	1188-37-0	Amino acids, peptides, and analogues	6.0163	5.8613	5.9162	6.2471	6.245	6.3666	5.6603	5.5901	5.4818	6.1171	6.0579	6.4955	5.9945	6.0001	6.0018
neg_851	Maleic Acid	metab_7834	-	map01100;map00650;map00350;map00760	Metabolic pathways;Butanoate metabolism;Tyrosine metabolism;Nicotinate and nicotinamide metabolism	C01384	HMDB0000176;HMDB0303644;MJDBOTE0000465	neg	-	-	Metabolism;Metabolism;Metabolism;Metabolism	Global and overview maps;Carbohydrate metabolism;Amino acid metabolism;Metabolism of cofactors and vitamins	Organic acids and derivatives	Carboxylic acids and derivatives	115.003	M-H	C4H4O4	1.67	0.0076565	80.6	0	-8.56493	110-16-7	Dicarboxylic acids and derivatives	5.5645	5.4295	5.7152	6.0027	6.2618	6.1985	5.1356	5.0488	4.9395	5.7339	5.678	5.8842	5.6603	5.666	5.6662
neg_856	Oxidized Glutathione	metab_7838	-	map01100;map00480;map01240	Metabolic pathways;Glutathione metabolism;Biosynthesis of cofactors	C00127	HMDB0003337;HMDB0011691;PW_C001847;MJDBOTE0000407	neg	-	-	Metabolism;Metabolism;Metabolism	Global and overview maps;Metabolism of other amino acids;Global and overview maps	Organic acids and derivatives	Carboxylic acids and derivatives	611.145	M-H	C20H32N6O12S2	1.7059	0.00850554	82.1	0	0.272902	15718-51-1;27025-41-8	Amino acids, peptides, and analogues	4.0761	3.9181	4.0284	5.7539	5.8641	5.9454	3.4972	3.4651	3.4865	5.8024	5.8944	5.5764	5.306	5.3078	5.3007
neg_858	6-Oxopiperidine-2-carboxylic acid	metab_7840	-	-	-	-	HMDB0061705	neg	-	-	-	-	Organic acids and derivatives	Carboxylic acids and derivatives	142.05	M-H	C6H9NO3	1.7241	0.000408274	0	46.3	-6.44708	-	Amino acids, peptides, and analogues	4.4881	4.6801	4.5509	5.0363	5.2011	5.2093	4.247	4.2033	4.2182	5.0557	4.9991	4.9791	4.7536	4.7533	4.7536
neg_907	Glucaric acid	metab_7894	-	map01100;map00053	Metabolic pathways;Ascorbate and aldarate metabolism	C00818	HMDB0000663;LMFA01170108	neg	-	-	Metabolism;Metabolism	Global and overview maps;Carbohydrate metabolism	Organic oxygen compounds	Organooxygen compounds	479.091	2M+Hac-H	C6H10O8	2.7284	0.049222	0	42.2	4.46686	87-73-0	Carbohydrates and carbohydrate conjugates	4.4102	3.9752	4.2561	5.1893	5.299	5.391	4.11	4.2018	3.924	5.0764	5.2215	5.2447	4.6866	4.6497	4.6505
neg_916	Gentisein	metab_7904	-	-	-	C10065	HMDB0029463	neg	-	-	-	-	Organoheterocyclic compounds	Benzopyrans	289.035	M+FA-H	C13H8O5	2.7925	0.029821	0	54.4	-0.619497	529-49-7	1-benzopyrans	3.7177	3.574	3.5032	5.1665	5.1222	5.3181	3.9918	3.7876	3.8126	4.7161	4.5352	4.6404	4.349	4.3512	4.3723
neg_952	Trans-Chlorogenic acid	metab_7944	-	map00940;map00941;map01110;map00945	Phenylpropanoid biosynthesis;Flavonoid biosynthesis;Biosynthesis of secondary metabolites;Stilbenoid, diarylheptanoid and gingerol biosynthesis	C00852	HMDB0003164;HMDB0032849	neg	-	-	Metabolism;Metabolism;Metabolism;Metabolism	Biosynthesis of other secondary metabolites;Biosynthesis of other secondary metabolites;Global and overview maps;Biosynthesis of other secondary metabolites	Organic oxygen compounds	Organooxygen compounds	353.088	M-H	C16H18O9	2.8317	0.0302114	0	38.6	-0.348362	202650-88-2	Alcohols and polyols	5.3316	5.4163	5.3549	4.9773	5.0404	5.0011	4.9615	5.0718	5.2645	4.0477	4.5091	3.9166	5.1305	5.1325	5.154
neg_975	3-dehydroshikimate	metab_7969	-	map01100;map01110;map01240;map00999;map01230;map00400	Metabolic pathways;Biosynthesis of secondary metabolites;Biosynthesis of cofactors;Biosynthesis of various plant secondary metabolites;Biosynthesis of amino acids;Phenylalanine, tyrosine and tryptophan biosynthesis	C02637	HMDB0304122	neg	-	-	Metabolism;Metabolism;Metabolism;Metabolism;Metabolism;Metabolism	Global and overview maps;Global and overview maps;Global and overview maps;Biosynthesis of other secondary metabolites;Global and overview maps;Amino acid metabolism	Organic oxygen compounds	Organooxygen compounds	152.011	M-H2O-H	C7H7O5-	2.9239	0.0318309	0	84.2	-5.24585	-	Carbonyl compounds	4.0723	4.0422	4.2653	4.1112	4.2935	4.2833	3.2704	3.6146	3.6853	4.0767	4.1915	3.9774	4.0291	4.0533	4.0532
neg_984	(6R)-Folinic acid	metab_7979	-	map01100;map00670	Metabolic pathways;One carbon pool by folate	C03479	HMDB0247218	neg	-	-	Metabolism;Metabolism	Global and overview maps;Metabolism of cofactors and vitamins	Organoheterocyclic compounds	Pteridines and derivatives	472.159	M-H	C20H23N7O7	2.9541	0.0119527	0	50.2	0.10565	-	Pterins and derivatives	5.5335	5.5209	5.3831	6.0415	5.981	6.0752	5.6346	5.6761	5.6179	6.3307	6.3008	6.3471	5.898	5.9079	5.9003
neg_992	Theogallin	metab_7988	-	-	-	C10834	HMDB0039287	neg	-	-	-	-	Organic oxygen compounds	Organooxygen compounds	343.067	M-H	C14H16O10	2.9833	0.0247525	0	50	-0.329403	17365-11-6;53584-43-3	Alcohols and polyols	5.5358	5.3335	5.3439	4.8248	4.7934	4.9828	5.4352	5.5433	5.0804	4.7048	4.9949	4.5995	5.2161	5.1987	5.2185
neg_4075	Caffeic Acid	metab_7998	-	map01100;map00940;map01110	Metabolic pathways;Phenylpropanoid biosynthesis;Biosynthesis of secondary metabolites	C01197	HMDB0003501;HMDB0001964	neg	-	-	Metabolism;Metabolism;Metabolism	Global and overview maps;Biosynthesis of other secondary metabolites;Global and overview maps	Phenylpropanoids and polyketides	Cinnamic acids and derivatives	179.034	M-H	C9H8O4	4.0732	0.0142999	59.6	0	-4.29232	501-16-6;331-39-5;4361-87-9	Hydroxycinnamic acids and derivatives	4.3809	4.4893	4.2621	4.9105	4.853	4.8499	5.2543	5.2071	5.1786	5.5316	5.6536	5.7578	5.0895	5.1003	5.1003
neg_4762	D-Xylonic acid	metab_8000	-	map00040;map00053	Pentose and glucuronate interconversions;Ascorbate and aldarate metabolism	C05411	HMDB0242170;HMDB0060256;HMDB0059750	neg	-	-	Metabolism;Metabolism	Carbohydrate metabolism;Carbohydrate metabolism	Organic oxygen compounds	Organooxygen compounds	165.04	M-H	C5H10O6	0.9281	0.0278176	0	38	-5.16853	526-91-0;4172-44-5	Carbohydrates and carbohydrate conjugates	5.8054	5.6987	6.1231	6.2461	6.2448	6.3172	5.2535	5.2336	5.3792	5.9417	5.9854	6.0199	5.8574	5.8594	5.8791
neg_799	Dehydroascorbic acid	metab_8001	-	map01100;map00480;map00053	Metabolic pathways;Glutathione metabolism;Ascorbate and aldarate metabolism	C05422	HMDB0001264;PW_C000977	neg	-	-	Metabolism;Metabolism;Metabolism	Global and overview maps;Metabolism of other amino acids;Carbohydrate metabolism	Organoheterocyclic compounds	Lactones	154.998	M-H2O-H	C6H6O6	1.1544	0.00812846	0	39.1	-4.96979	490-83-5	Gamma butyrolactones	5.2815	5.2334	5.3884	5.6265	5.8754	5.8435	3.938	3.9413	2.842	5.0092	5.1198	5.0654	5.2702	5.2723	5.2771
neg_794	Malic Acid	metab_8009	-	map01100;map00630;map01110;map01200;map00620;map00710;map00020	Metabolic pathways;Glyoxylate and dicarboxylate metabolism;Biosynthesis of secondary metabolites;Carbon metabolism;Pyruvate metabolism;Carbon fixation in photosynthetic organisms;Citrate cycle (TCA cycle)	C00149	HMDB0000156;PW_C000592;MJDBOTE0000694	neg	Organic acids	Carboxylic acids	Metabolism;Metabolism;Metabolism;Metabolism;Metabolism;Metabolism;Metabolism	Global and overview maps;Carbohydrate metabolism;Global and overview maps;Global and overview maps;Carbohydrate metabolism;Energy metabolism;Carbohydrate metabolism	Organic acids and derivatives	Hydroxy acids and derivatives	133.013	M-H	C4H6O5	1.1309	0.015287	96.7	0	-7.17294	97-67-6;617-48-1;6915-15-7	Beta hydroxy acids and derivatives	6.5506	6.4565	6.8848	7.0323	7.2508	7.2144	6.1432	6.0812	6.0075	6.9488	6.8539	7.043	6.7365	6.748	6.7482
neg_139	Malonic Acid	metab_8010	-	map00240;map01100;map01212;map00061;map00410	Pyrimidine metabolism;Metabolic pathways;Fatty acid metabolism;Fatty acid biosynthesis;beta-Alanine metabolism	C00383	LMFA01170041;PW_C000543;HMDB0000691	neg	Organic acids	Carboxylic acids	Metabolism;Metabolism;Metabolism;Metabolism;Metabolism	Nucleotide metabolism;Global and overview maps;Global and overview maps;Lipid metabolism;Metabolism of other amino acids	Organic acids and derivatives	Carboxylic acids and derivatives	103.003	M-H, M+FA-H	C3H4O4	1.1309	0.0104129	65.8	0	-9.78281	141-82-2	Dicarboxylic acids and derivatives	4.9656	4.855	5.0463	5.4583	5.5335	5.5778	4.5833	4.5748	4.3236	5.4874	5.5341	5.5166	5.1387	5.1409	5.1474
neg_4669	Mesaconic Acid	metab_8012	-	map01100;map00630;map00660;map01200	Metabolic pathways;Glyoxylate and dicarboxylate metabolism;C5-Branched dibasic acid metabolism;Carbon metabolism	C01732	HMDB0000749;HMDB0000634;LMFA01170116	neg	-	-	Metabolism;Metabolism;Metabolism;Metabolism	Global and overview maps;Carbohydrate metabolism;Carbohydrate metabolism;Global and overview maps	Lipids and lipid-like molecules	Fatty Acyls	129.018	M-H	C5H6O4	1.5533	0.00907847	62.7	0	-7.37094	498-23-7;498-24-8	Fatty acids and conjugates	5.8893	6.0376	6.2018	6.5472	6.507	6.4902	5.862	5.7998	5.7879	6.3777	6.4153	6.5028	6.1667	6.1688	6.1744
neg_442	Pyrocatechol	metab_8014	-	map01100	Metabolic pathways	C00090	PW_C000764;HMDB0000957;MJDBOTE0000665	neg	-	-	Metabolism	Global and overview maps	Benzenoids	Phenols	109.028	M-H, M+FA-H	C6H6O2	3.1398	0.00923315	79.4	0	-9.26064	120-80-9	Benzenediols	5.8602	5.8541	5.8741	6.5689	6.6678	6.7019	5.7421	5.8856	5.6109	6.7217	6.825	6.7611	6.317	6.3192	6.3248
neg_855	Sedoheptulose	metab_8015	-	map01100;map00710	Metabolic pathways;Carbon fixation in photosynthetic organisms	C02076	HMDB0003219	neg	Carbohydrates	Monosaccharides	Metabolism;Metabolism	Global and overview maps;Energy metabolism	Organic oxygen compounds	Organooxygen compounds	191.055	M-H2O-H	C7H14O7	1.7059	0.0133197	0	34.8	-3.99908	3019-74-7;470-46-2	Carbohydrates and carbohydrate conjugates	4.9813	5.0154	5.1577	5.3853	5.2284	5.3159	4.2248	4.3062	4.2585	5.0557	5.0576	5.1001	4.9752	4.977	4.986
