# Supplementary material for: Comparison of Metabolites and Main Nutritional Components between Uncooked and Cooked Purple Rice
Source: Metabolites. 2023 Sep 15;13(9):1018. doi: 10.3390/metabo13091018 (PMC10536460; doi:10.3390/metabo13091018)
Supplement: Supplementary file 1 [file metabolites-13-01018-s001.zip › Table S3.xls]

## Sheet: Table S3
Table S3. Summary chart displaying metabolite details for YZN1C and YZN1U.
ID	Metabolite	Metab ID	level	KEGG Pathway ID	KEGG Pathway Description	KEGG Compound ID	Library ID	Mode	KEGG Compound First Category	KEGG Compound Second Category	KEGG Pathway First Category	KEGG Pathway Second Category	HMDB Superclass	HMDB Class	M/Z	Adducts	Formula	Retention time	RSD	Fragmentation Score	Theoretical Fragmentation Score	Mass Error	CAS ID	HMDB Subclass	YZN1U_1	YZN1U_2	YZN1U_3	YZN1C_1	YZN1C_2	YZN1C_3	YZ6U_1	YZ6U_2	YZ6U_3	YZ6C_1	YZ6C_2	YZ6C_3	QC01	QC02	QC03
pos_1000	6''-O-Malonylwistin	metab_3	-	-	-	-	HMDB0039083	pos	-	-	-	-	Lipids and lipid-like molecules	Steroids and steroid derivatives	511.123	M+H-2H2O	C26H26O13	4.8141	0.022546	0	35.2	-1.47066	163310-44-9	Physalins and derivatives	5.0951	5.0489	5.1419	4.5774	4.7179	4.4329	5.0606	4.9979	5.1772	4.3451	4.5552	4.3204	4.9277	4.9301	4.912
pos_1002	Peonidin 3-(6''-acetylglucoside)	metab_5	-	-	-	-	HMDB0301893;LMPK12010242	pos	-	-	-	-	Phenylpropanoids and polyketides	Flavonoids	505.133	M+H	C24H24O12	4.8459	0.00967148	79.1	0	-1.69019	-	Flavonoid glycosides	6.0111	5.8298	5.771	5.2704	5.2763	5.2221	5.5078	5.6541	5.673	3.7244	4.5118	3.9524	5.6121	5.6075	5.6037
pos_1006	Isovitexin	metab_8	-	map00944	Flavone and flavonol biosynthesis	C01714	LMPK12110338;HMDB0253708;MJDBOTE0000242	pos	-	-	Metabolism	Biosynthesis of other secondary metabolites	Lipids and lipid-like molecules	Fatty Acyls	433.112	M+H	C21H20O10	4.9094	0.0168155	80.7	0	-1.98302	38953-85-4	Fatty amides	5.1963	4.9087	4.992	4.6042	4.5793	4.4965	4.9866	4.962	4.9997	3.9958	4.4126	4.2681	4.9067	4.8961	4.8928
pos_1010	Forsythiaside	metab_13	-	-	-	C10456	HMDB0252460	pos	-	-	-	-	Phenylpropanoids and polyketides	Cinnamic acids and derivatives	669.18	M+2Na-H	C29H36O15	4.9733	0.0357918	0	70.5	5.16599	79916-77-1	Hydroxycinnamic acids and derivatives	5.3702	5.2431	5.2222	3.7391	3.8074	3.7777	4.5318	4.7012	5.075	3.7577	3.7473	3.7447	4.9149	4.8911	4.8861
pos_1016	6-keto PGE1	metab_19	-	map00590;map01100	Arachidonic acid metabolism;Metabolic pathways	C05962	HMDB0004241;LMFA03010012	pos	-	-	Metabolism;Metabolism	Lipid metabolism;Global and overview maps	Lipids and lipid-like molecules	Fatty Acyls	351.216	M+H-H2O	C20H32O6	5.1004	0.0208114	63.4	0	-2.02038	67786-53-2	Eicosanoids	5.3172	5.4494	5.5103	5.0598	4.8203	4.9652	5.0542	4.7246	4.9847	4.6852	4.7152	4.1496	5.1403	5.127	5.1231
pos_1020	Islatravir	metab_24	-	-	-	-	HMDB0253596	pos	-	-	-	-	Organoheterocyclic compounds	Imidazopyrimidines	625.153	2M+K	C12H12FN5O3	5.1402	0.131441	0	53.8	8.95847	-	Purines and purine derivatives	5.0355	4.779	4.8958	3.636	3.6451	3.6502	4.4886	3.5818	4.5174	3.6546	3.6442	3.6415	4.3804	4.2797	4.2905
pos_1024	Oenin	metab_28	-	map00942	Anthocyanin biosynthesis	C12140	LMPK12010372;HMDB0038010;HMDB0030777	pos	-	-	Metabolism	Biosynthesis of other secondary metabolites	Phenylpropanoids and polyketides	Flavonoids	493.133	M+H	C23H24O12	5.1878	0.0348497	84.1	0	-1.83766	7228-78-6;30113-37-2	Flavonoid glycosides	5.0317	5.1885	5.2166	4.9107	4.5168	4.7135	5.5357	5.5604	5.482	5.1465	5.2551	5.3258	5.2763	5.2526	5.2486
pos_1026	3,7-Dimethylquercetin	metab_30	-	map01110;map00944	Biosynthesis of secondary metabolites;Flavone and flavonol biosynthesis	C01265	HMDB0029263	pos	-	-	Metabolism;Metabolism	Global and overview maps;Biosynthesis of other secondary metabolites	Phenylpropanoids and polyketides	Flavonoids	331.08	M+H	C17H14O7	5.1958	0.0831662	0	76.9	-2.37746	2068-02-02	O-methylated flavonoids	4.4355	4.5043	4.6077	4.1339	3.3748	3.9966	4.9273	4.9295	4.8062	4.5241	4.6335	4.7294	4.6071	4.5416	4.6044
pos_1027	Acteoside	metab_31	-	-	-	C10501	HMDB0034843;HMDB0259785	pos	-	-	-	-	Lipids and lipid-like molecules	Prenol lipids	669.18	M+2Na-H	C29H36O15	5.1958	0.0415673	0	55.5	5.50125	61276-17-3	Triterpenoids	5.7866	5.865	5.8866	4.462	4.534	4.3459	5.1838	5.1132	5.3186	3.7653	3.755	3.901	5.4554	5.427	5.4225
pos_1030	Procyanidin B1	metab_35	-	-	-	C10221	HMDB0029754;LMPK12030001	pos	-	-	-	-	Phenylpropanoids and polyketides	Flavonoids	611.175	M+CH3OH+H	C30H26O12	5.2752	0.101334	0	59.7	-1.68192	20315-25-7	Biflavonoids and polyflavonoids	5.2309	5.3848	5.1256	4.0453	4.0544	4.0595	4.4264	4.3953	4.1517	4.0639	4.0535	4.0508	4.7614	4.7625	4.6832
pos_1033	4-O-p-Coumaroylquinic acid	metab_38	-	-	-	C10441	HMDB0302093	pos	-	-	-	-	Organic oxygen compounds	Organooxygen compounds	339.107	M+H	C16H18O8	5.3625	0.0212192	0	63.6	-2.24718	-	Alcohols and polyols	4.839	4.8521	4.8813	4.4383	3.4734	4.1504	5.1207	5.0627	5.0857	4.5731	4.6351	4.5088	4.8127	4.8142	4.7974
pos_1057	N-Feruloyltyramine	metab_63	-	-	-	C02717	HMDB0029365	pos	-	-	-	-	Benzenoids	Phenols	314.138	M+H	C18H19NO4	5.6719	0.0372307	86.3	0	-2.48	66648-43-9	Methoxyphenols	4.1799	4.4614	4.435	3.8483	3.3892	3.4381	4.7862	4.7528	5.0739	4.509	4.4747	4.7217	4.5702	4.5435	4.5416
pos_1066	Taraxacoside	metab_73	-	-	-	-	HMDB0030055	pos	-	-	-	-	Organic oxygen compounds	Organooxygen compounds	381.117	M+H-H2O	C18H22O10	5.8627	0.0249627	0	65.4	-2.04552	98449-40-2	Carbohydrates and carbohydrate conjugates	3.8994	3.4247	3.4225	4.6663	4.5277	4.6115	3.4019	3.3789	3.4337	4.5552	4.7843	4.6755	4.1223	4.1379	4.1173
pos_1067	Methyl 3,4-dicaffeoylquinate	metab_74	-	-	-	-	HMDB0037093	pos	-	-	-	-	Organic oxygen compounds	Organooxygen compounds	545.164	M+H	C27H28O12	5.8707	0.0730859	0	64.5	-2.25417	345642-66-2	Alcohols and polyols	4.433	4.5473	4.3366	3.7447	3.7538	3.7589	4.9778	4.9945	4.9536	4.0163	3.9761	4.4256	4.5277	4.5799	4.5244
pos_1069	CMP-N-trimethyl-2-aminoethylphosphonate	metab_76	-	map01100;map00440	Metabolic pathways;Phosphonate and phosphinate metabolism	C05674	HMDB0060072	pos	-	-	Metabolism;Metabolism	Global and overview maps;Metabolism of other amino acids	Organic oxygen compounds	Organooxygen compounds	515.154	M+ACN+H	C14H27N4O10P2+	5.9021	0.00258139	0	47	-0.420291	-	Carbohydrates and carbohydrate conjugates	5.7503	5.8284	5.9918	5.6096	5.4372	5.4161	5.6643	5.7602	5.9175	5.4603	5.5418	5.5765	5.7357	5.7372	5.7378
pos_1081	Norethindrone	metab_89	-	-	-	C05028	HMDB0014855;LMST02030097	pos	-	-	-	-	Lipids and lipid-like molecules	Steroids and steroid derivatives	316.226	M+NH4	C20H26O2	5.9967	0.00353913	50.4	0	-2.23505	68-22-4	Estrane steroids	4.3443	5.0327	4.9389	3.4872	3.4963	3.5014	3.456	3.4331	3.4878	3.5058	3.4954	3.4928	4.209	4.2105	4.2121
pos_1085	Chrysoeriol	metab_93	-	map00944	Flavone and flavonol biosynthesis	C04293	LMPK12110799;HMDB0030667	pos	-	-	Metabolism	Biosynthesis of other secondary metabolites	Phenylpropanoids and polyketides	Flavonoids	301.07	M+H	C16H12O6	6.0517	0.0126831	92	0	-2.21738	491-71-4	O-methylated flavonoids	4.911	4.9297	4.9076	4.6136	4.2153	4.5387	5.6311	5.2252	5.4981	5.297	5.2202	5.371	5.2061	5.2009	5.1951
pos_1087	Epitheaflavic acid 3'-gallate	metab_95	-	-	-	-	HMDB0040610	pos	-	-	-	-	Phenylpropanoids and polyketides	Flavonoids	603.075	M+Na	C28H20O14	6.0597	0.0287496	0	70.5	1.37938	34218-97-8	Flavans	5.0739	5.3495	4.6329	4.0018	4.0109	4.016	4.8612	5.2215	4.9964	4.0204	4.01	4.0073	4.511	4.5304	4.5073
pos_1096	Carboxyethyllysine	metab_105	-	-	-	-	HMDB0249659	pos	-	-	-	-	Organic acids and derivatives	Carboxylic acids and derivatives	236.162	M+NH4	C9H18N2O4	6.1072	0.0199895	0	39.7	5.49049	-	Amino acids, peptides, and analogues	4.4575	4.4226	4.4065	4.7787	4.7719	4.7337	4.5664	4.5557	4.5243	4.8198	4.8151	4.7519	4.5298	4.5279	4.5138
pos_11	Phlorizine	metab_109	-	map00941;map01110	Flavonoid biosynthesis;Biosynthesis of secondary metabolites	C01604	HMDB0036634;HMDB0256451	pos	-	-	Metabolism;Metabolism	Biosynthesis of other secondary metabolites;Global and overview maps	Phenylpropanoids and polyketides	Flavonoids	437.143	M+H, M+Na, M+H-H2O, M+H-2H2O	C21H24O10	5.1958	0.0215664	0	65.5	-1.9161	60-81-1	Flavonoid glycosides	5.8675	5.6995	5.8834	5.5048	5.3814	5.2711	4.4269	4.9751	4.7349	3.6579	4.1351	3.7221	5.4333	5.435	5.4179
pos_1105	Stearidonic acid	metab_116	-	map00592;map01110	alpha-Linolenic acid metabolism;Biosynthesis of secondary metabolites	C16300	LMFA01030357;PW_C002804;HMDB0006547	pos	-	-	Metabolism;Metabolism	Lipid metabolism;Global and overview maps	Lipids and lipid-like molecules	Fatty Acyls	259.205	M+H-H2O	C18H28O2	6.1627	0.0209907	0	69.7	-1.71285	20290-75-9	Lineolic acids and derivatives	4.8119	4.756	5.0053	4.428	4.5508	4.5012	4.2203	4.3464	4.3846	4.1381	3.7884	3.8263	4.6322	4.619	4.6149
pos_1114	Traumatic acid	metab_126	-	map00592;map01110	alpha-Linolenic acid metabolism;Biosynthesis of secondary metabolites	C16308	LMFA01170002;HMDB0000933	pos	-	-	Metabolism;Metabolism	Lipid metabolism;Global and overview maps	Lipids and lipid-like molecules	Fatty Acyls	211.132	M+H-H2O	C12H20O4	6.186	0.0276584	0	56.7	-1.66906	6402-36-4	Fatty acids and conjugates	4.9464	4.7878	5.1404	4.3072	4.3424	4.3634	4.1428	4.4316	4.2158	3.8119	3.421	3.4183	4.6084	4.621	4.597
pos_1131	Pro-Pro-Phe	metab_143	-	-	-	-	HMDB0304811	pos	-	-	-	-	Organic acids and derivatives	Carboxylic acids and derivatives	741.359	2M+Na	C19H25N3O4	6.2337	0.0814941	0	47.4	1.53446	-	Amino acids, peptides, and analogues	5.2632	5.2711	5.651	5.0015	5.0106	5.0157	4.9703	4.9473	5.7582	5.0201	5.0097	5.007	5.1821	5.1469	5.1113
pos_1154	(15S)-Prostaglandin A2	metab_168	-	map00590;map01100	Arachidonic acid metabolism;Metabolic pathways	C05953	HMDB0002752;HMDB0242292	pos	Lipids	Eicosanoids	Metabolism;Metabolism	Lipid metabolism;Global and overview maps	Lipids and lipid-like molecules	Fatty Acyls	357.203	M+Na	C20H30O4	6.3126	0.00555834	0	38.4	-2.93916	13345-50-1	Eicosanoids	5.4039	5.5994	5.5201	4.225	3.7212	3.978	5.4826	5.223	6.0919	4.7252	4.3424	4.5069	5.5051	5.5067	5.5099
pos_1188	N-Acetylsphinganine	metab_201	-	-	-	-	HMDB0249513	pos	-	-	-	-	Lipids and lipid-like molecules	Sphingolipids	344.315	M+H	C20H41NO3	6.4081	0.00465237	0	64.1	-1.84067	-	Ceramides	5.4731	5.6706	5.6873	5.0313	5.1392	5.378	5.7735	5.6673	5.7646	5.2244	5.2156	5.3694	5.5165	5.5155	5.5194
pos_1237	Pregnenolone	metab_253	-	map01100	Metabolic pathways	C01953	HMDB0244633;HMDB0000253;LMST02030088;PW_C000173;MJDBOTE0000783	pos	Steroids;Hormones and transmitters	21-Carbon atoms;Steroid hormones	Metabolism	Global and overview maps	Lipids and lipid-like molecules	Steroids and steroid derivatives	349.273	M+CH3OH+H	C21H32O2	6.5826	0.0116932	0	48.9	-2.0525	145-13-1	Pregnane steroids	5.5475	5.7911	5.8298	5.3096	5.2749	5.1048	4.2725	4.4297	4.08	4.0503	3.7584	3.7557	5.3563	5.358	5.3484
pos_1250	PI(16:1(9Z)/18:1(9Z))	metab_267	-	-	-	C00626	HMDB0009801;LMGP06010873	pos	-	-	-	-	Lipids and lipid-like molecules	Glycerophospholipids	857.513	M+Na	C43H79O13P	6.6383	0.0850037	0	97.3	-2.14091	-	Glycerophosphoinositols	5.6962	5.7449	5.8421	6.1908	6.3751	6.2728	5.722	5.9435	5.8026	6.2547	6.1701	6.149	6.0788	6.0808	6.0142
pos_1272	Cis-Quinceoxepane	metab_290	-	-	-	-	HMDB0038108	pos	-	-	-	-	Organoheterocyclic compounds	Oxepanes	198.185	M+NH4	C12H20O	6.7257	0.0213173	0	69.7	-1.39286	133005-51-3	Not Available	5.1145	5.1668	5.3154	5.5612	5.3997	5.4984	5.1437	5.1855	5.26	5.454	5.5077	5.5394	5.3081	5.3257	5.322
pos_1343	2-Hydroxy-6-pentadecylbenzoic acid	metab_360	-	-	-	C10759	LMPK15040002;HMDB0029683	pos	-	-	-	-	Benzenoids	Benzene and substituted derivatives	349.273	M+H	C22H36O3	6.9002	0.019184	0	37	-2.29336	16611-84-0	Benzoic acids and derivatives	5.4642	5.649	5.5294	4.911	4.8502	5.0005	3.9271	3.9042	3.9589	3.9769	3.9666	3.9639	5.1784	5.1945	5.1904
pos_1357	15-deoxy-delta-12,14-PGJ2	metab_373	-	map00590	Arachidonic acid metabolism	C14717	LMFA03010021;HMDB0005079	pos	-	-	Metabolism	Lipid metabolism	Lipids and lipid-like molecules	Fatty Acyls	317.208	M+H	C20H28O3	6.9397	0.00935511	61.6	0	-9.16794	87893-55-8	Eicosanoids	6.6589	6.3239	6.5458	5.9825	5.9536	6.1117	6.0245	5.9342	6.1489	5.8364	5.5299	5.7774	6.2914	6.2995	6.2958
pos_1387	LysoPC(20:1(11Z)/0:0)	metab_403	-	map00564	Glycerophospholipid metabolism	C04230	HMDB0010391	pos	Lipids	Phospholipids	Metabolism	Lipid metabolism	Lipids and lipid-like molecules	Glycerophospholipids	550.385	M+H	C28H56NO7P	7.0188	0.00901528	0	46.5	-2.77689	-	Glycerophosphocholines	5.3852	5.2895	5.1236	4.5669	4.2265	4.557	5.5255	5.2985	5.4205	4.4653	4.6447	5.0458	5.3489	5.3568	5.3529
pos_14	D-Glucaro-1,4-lactone	metab_417	-	-	-	C21095	HMDB0041862	pos	-	-	-	-	Organoheterocyclic compounds	Lactones	210.06	M+H-2H2O, M+Na, M+NH4, M+H	C6H8O7	1.4518	0.0038157	0	42.1	-1.72983	5027-63-4	Gamma butyrolactones	6.2114	6.3877	6.3199	6.8075	6.8102	6.7669	6.1325	6.0939	5.7745	6.6629	6.5888	6.6988	6.4161	6.4148	6.4181
pos_1416	PA(20:1(11Z)/22:6(4Z,7Z,10Z,13Z,16Z,19Z))	metab_430	-	map01100;map00564;map01110;map00561;map04070	Metabolic pathways;Glycerophospholipid metabolism;Biosynthesis of secondary metabolites;Glycerolipid metabolism;Phosphatidylinositol signaling system	C00416	LMGP10010555;PW_C062534;HMDB0115115	pos	Lipids	Phospholipids	Metabolism;Metabolism;Metabolism;Metabolism;Environmental Information Processing	Global and overview maps;Lipid metabolism;Global and overview maps;Lipid metabolism;Signal transduction	Lipids and lipid-like molecules	Glycerophospholipids	797.516	M+Na	C45H75O8P	7.1376	0.0524672	0	83.2	8.52538	-	Glycerophosphates	6.2114	5.7854	5.9054	5.3943	5.2139	5.6479	5.8927	5.5156	5.5163	4.3411	4.8588	5.1248	5.9142	5.9536	5.9151
pos_1432	DG(18:1(11Z)/16:0/0:0)	metab_447	-	-	-	C00165	HMDB0007185;PW_C003236	pos	-	-	-	-	Lipids and lipid-like molecules	Glycerolipids	577.518	M+H-H2O	C37H70O5	7.2169	0.0363655	0	43.8	-1.72307	-	Diradylglycerols	5.844	6.0944	6.1435	6.278	6.4999	6.4579	5.8037	6.1798	6.411	6.595	6.5942	6.6359	6.3099	6.2947	6.3263
pos_1437	(-)-Menthone	metab_451	-	map01110;map00902	Biosynthesis of secondary metabolites;Monoterpenoid biosynthesis	C00843	LMPR0102090004;HMDB0035162	pos	-	-	Metabolism;Metabolism	Global and overview maps;Metabolism of terpenoids and polyketides	Lipids and lipid-like molecules	Prenol lipids	326.305	2M+NH4	C10H18O	7.2328	0.0226848	0	42.3	-2.24751	14073-97-3	Monoterpenoids	5.7522	5.7268	5.7543	5.3237	5.5166	5.3164	5.542	5.6271	5.4881	5.1703	4.8891	4.9341	5.5006	5.5194	5.5155
pos_1454	PA(22:6(4Z,7Z,10Z,13Z,16Z,19Z)/20:0)	metab_469	-	map01100;map00564;map01110;map00561;map04070	Metabolic pathways;Glycerophospholipid metabolism;Biosynthesis of secondary metabolites;Glycerolipid metabolism;Phosphatidylinositol signaling system	C00416	HMDB0115413;PW_C062839;LMGP10010834	pos	Lipids	Phospholipids	Metabolism;Metabolism;Metabolism;Metabolism;Environmental Information Processing	Global and overview maps;Lipid metabolism;Global and overview maps;Lipid metabolism;Signal transduction	Lipids and lipid-like molecules	Glycerophospholipids	799.531	M+Na	C45H77O8P	7.2725	0.0108813	0	43.2	8.09807	-	Glycerophosphates	5.9454	5.7525	5.3963	4.5331	4.5117	4.9596	5.8653	5.5779	5.6036	4.5212	4.5108	4.8535	5.6996	5.709	5.7052
pos_16	Myristoleic Acid methyl ester	metab_615	-	-	-	-	-	pos	-	-	-	-	-	-	241.216	M+H, M+Na, M+NH4, M+H-2H2O	C15H28O2	6.4161	0.00667311	41.4	0	-1.99202	-	-	1.5566	1.604	1.6018	5.4431	3.4776	6.9231	5.5064	1.5594	1.6127	5.6082	4.3266	6.2955	5.6193	5.6249	5.6211
pos_1769	PA(18:3(9Z,12Z,15Z)/22:0)	metab_795	-	map01100;map00564;map01110;map00561;map04070	Metabolic pathways;Glycerophospholipid metabolism;Biosynthesis of secondary metabolites;Glycerolipid metabolism;Phosphatidylinositol signaling system	C00416	PW_C062436;HMDB0115018;LMGP10010418	pos	Lipids	Phospholipids	Metabolism;Metabolism;Metabolism;Metabolism;Environmental Information Processing	Global and overview maps;Lipid metabolism;Global and overview maps;Lipid metabolism;Signal transduction	Lipids and lipid-like molecules	Glycerophospholipids	777.547	M+Na	C43H79O8P	7.5826	0.0270329	0	42.4	8.73014	-	Glycerophosphates	6.0444	6.1308	5.9203	5.5118	5.4365	5.4545	6.2812	6.1721	6.1556	5.1799	5.6016	5.8206	5.9684	5.9549	5.9784
pos_1835	DGDG(18:2/18:2)	metab_863	-	-	-	-	-	pos	-	-	-	-	-	-	963.599	M+Na	C51H88O15	7.2805	0.0318171	80.4	0	-2.54412	-	-	6.4461	6.2942	6.1853	5.6293	5.8758	5.8222	6.351	6.0977	6.2066	5.3204	5.6707	5.8714	6.3041	6.306	6.3288
pos_1874	DG(18:3(9Z,12Z,15Z)/16:0/0:0)	metab_904	-	-	-	C00165	PW_C003352;HMDB0007301	pos	-	-	-	-	Lipids and lipid-like molecules	Fatty Acyls	613.481	M+Na	C37H66O5	7.1535	0.0138313	0	91	1.83804	-	Lineolic acids and derivatives	5.8442	5.5601	5.6936	5.0636	5.088	5.1244	5.5142	5.415	4.9138	4.1826	4.1722	4.5223	5.5053	5.5167	5.5145
pos_1876	Glycerol 2-(9Z,12Z-octadecadienoate) 1-hexadecanoate 3-O-[alpha-D-galactopyranosyl-(1->6)-beta-D-galactopyranoside]	metab_906	-	-	-	-	HMDB0041511	pos	-	-	-	-	Lipids and lipid-like molecules	Glycerolipids	961.583	M+2Na-H	C49H88O15	7.1455	0.0197916	0	74.7	-0.018587	145033-48-3	Glycosylglycerols	6.1391	5.9055	5.7075	4.6119	5.3144	5.4082	5.9791	5.5704	5.8555	4.6778	5.3213	5.4489	5.9794	5.9929	5.9955
pos_194	4-Hydroxy-1H-indole-3-acetonitrile	metab_970	-	-	-	-	HMDB0038462	pos	-	-	-	-	Organoheterocyclic compounds	Indoles and derivatives	205.097	M+H, M+CH3OH+H	C10H8N2O	2.8904	0.0114221	0	39.4	-1.74798	118573-52-7	Hydroxyindoles	5.4048	5.7017	5.3681	5.0934	5.1025	5.1076	5.4363	5.0392	5.5702	5.112	5.1016	5.0989	5.2708	5.2646	5.261
pos_1990	9-Hpode	metab_1020	-	map01100;map00591	Metabolic pathways;Linoleic acid metabolism	C14827	HMDB0242602;LMFA02000012;HMDB0062434	pos	-	-	Metabolism;Metabolism	Global and overview maps;Lipid metabolism	Lipids and lipid-like molecules	Fatty Acyls	357.203	M+2Na-H	C18H32O4	6.8447	0.0206611	0	35.7	5.40462	29774-12-7	Lineolic acids and derivatives	5.5416	5.8288	5.6234	4.8744	5.1749	5.1399	5.6994	5.4137	6.1825	5.236	5.1413	5.1126	5.5923	5.5939	5.6085
pos_200	Domesticoside	metab_1031	-	-	-	-	HMDB0029647	pos	-	-	-	-	Organic oxygen compounds	Organooxygen compounds	367.099	M+Na, M+K	C15H20O9	3.0973	0.009485	0	35.9	-2.10424	24587-97-1	Carbohydrates and carbohydrate conjugates	5.1031	5.1478	5.113	5.8914	5.9387	5.918	5.0397	5.0702	5.2403	5.6648	5.7808	5.6247	5.4397	5.4413	5.4335
pos_2008	Cetyl recinoleate	metab_1040	-	-	-	-	HMDB0249839	pos	-	-	-	-	Lipids and lipid-like molecules	Fatty Acyls	540.534	M+NH4	C34H66O3	6.813	0.0156879	0	32.5	-1.50847	-	Fatty acid esters	6.319	6.3727	6.3099	5.8358	6.0166	5.9564	6.3702	6.389	6.4317	6.0417	5.9668	6.0939	6.1386	6.1259	6.1366
pos_2014	Sclareol	metab_1046	-	map00904;map01110	Diterpenoid biosynthesis;Biosynthesis of secondary metabolites	C09183	LMPR0104030010;HMDB0036827;MJDBOTE0001479	pos	-	-	Metabolism;Metabolism	Metabolism of terpenoids and polyketides;Global and overview maps	Lipids and lipid-like molecules	Prenol lipids	326.305	M+NH4	C20H36O2	6.805	0.0116351	0	57.6	-2.33456	515-03-7	Diterpenoids	6.5001	6.4073	6.4051	6.07	6.2295	6.1174	6.3376	6.3827	6.2209	5.956	5.7336	5.8202	6.2795	6.2811	6.2889
pos_202	Robinetin	metab_1051	-	-	-	C10177	LMPK12111577	pos	-	-	-	-	-	-	285.039	M+H-H2O, M+H	C15H10O7	3.1451	0.0168768	33	0	-2.01362	490-31-3	-	5.0034	5.0207	5.0591	5.5128	5.4786	5.4642	5.2072	5.3225	5.0419	5.2952	5.5532	5.2626	5.2805	5.2701	5.2664
pos_2038	DG(18:2(9Z,12Z)/16:0/0:0)	metab_1069	-	-	-	C00165	PW_C003294;HMDB0007243	pos	-	-	-	-	Lipids and lipid-like molecules	Fatty Acyls	575.502	M+H-H2O	C37H68O5	6.7814	0.0683329	0	36.7	-1.75862	-	Lineolic acids and derivatives	6.3605	6.7167	6.7397	6.9142	7.0082	6.9492	6.4745	6.7203	6.6807	6.9229	6.8023	6.8286	6.6734	6.7228	6.6714
pos_204	Skimmin	metab_1070	-	-	-	-	HMDB0258334	pos	-	-	-	-	Phenylpropanoids and polyketides	Coumarins and derivatives	289.07	M+H-2H2O, M+H	C15H16O8	3.0973	0.0116239	53.7	0	-1.99675	-	Coumarin glycosides	5.1249	5.3641	5.0881	4.4419	4.253	4.218	5.0193	4.9145	4.9005	4.7761	4.7474	5.1035	4.9622	4.9722	4.9684
pos_205	Homovanillic Acid	metab_1078	-	map01100;map00350	Metabolic pathways;Tyrosine metabolism	C05582	PW_C000074;HMDB0000118;MJDBSJD0000085	pos	-	-	Metabolism;Metabolism	Global and overview maps;Amino acid metabolism	Benzenoids	Phenols	183.065	M+H-H2O, M+H	C9H10O4	3.0894	0.0127435	32.3	0	-1.21119	306-08-1	Methoxyphenols	3.8229	3.6304	3.916	5.6244	5.6549	5.6602	3.9073	3.9448	3.9491	5.4013	5.5652	5.378	5.1349	5.1243	5.1326
pos_2076	D-(+)-dihydrocarvone	metab_1104	-	map01110;map00903	Biosynthesis of secondary metabolites;Limonene and pinene degradation	C11398	HMDB0302236	pos	-	-	Metabolism;Metabolism	Global and overview maps;Metabolism of terpenoids and polyketides	Lipids and lipid-like molecules	Prenol lipids	170.154	M+NH4	C10H16O	6.7257	0.023563	0	64.1	-1.47965	-	Monoterpenoids	4.863	4.8394	5.0182	5.2681	5.1751	5.1987	4.893	4.8587	4.9242	5.1237	5.2176	5.2775	5.0196	5.0401	5.0305
pos_2172	P-Menthane-3,8-diol	metab_1203	-	-	-	C02904	HMDB0035595;HMDB0036145	pos	-	-	-	-	Lipids and lipid-like molecules	Prenol lipids	367.284	2M+Na	C10H20O2	6.5114	0.0466382	0	61.7	5.23213	42822-86-6;91739-72-9;565-50-4	Monoterpenoids	5.1098	5.3822	5.3766	4.6869	4.7162	4.8124	4.6557	4.6327	4.6874	4.7055	4.6951	4.6924	4.8966	4.8976	4.8615
pos_2189	3-Oxododecanoic acid	metab_1221	-	-	-	C02367	PW_C006734;HMDB0010727	pos	-	-	-	-	Organic acids and derivatives	Keto acids and derivatives	179.143	M+H-2H2O	C12H22O3	6.4797	0.0329177	0	33.4	-1.15812	-	Medium-chain keto acids and derivatives	5.2564	4.9711	5.3581	4.8226	4.7747	4.6805	4.7392	4.565	4.8479	4.5891	4.2304	4.3497	4.9117	4.9385	4.9345
pos_2250	(S)-14-Methylhexadecanoic acid	metab_1289	-	-	-	-	HMDB0031067	pos	-	-	-	-	Lipids and lipid-like molecules	Fatty Acyls	288.289	M+NH4	C17H34O2	6.3444	0.0229982	0	38.7	-2.54166	5746-59-8	Fatty acids and conjugates	4.8356	4.97	4.8104	3.6593	3.9666	4.1954	5.3691	5.4316	5.4881	4.6062	4.348	5.1221	5.0497	5.0554	5.0359
pos_226	Dihydroisorhamnetin	metab_1298	-	-	-	-	HMDB0037501	pos	-	-	-	-	Phenylpropanoids and polyketides	Flavonoids	301.07	M+H-H2O, M+H	C16H14O7	3.9787	0.00513169	0	45.8	-2.52191	55812-91-4	O-methylated flavonoids	7.5788	7.3713	7.3822	7.0142	7.0249	7.0096	6.9643	7.1251	6.8901	6.1677	6.3411	6.199	7.2171	7.2165	7.213
pos_2286	Cinobufagin	metab_1326	-	-	-	C16931	HMDB0250266;LMST01130032	pos	Steroids	24-Carbon atoms	-	-	Lipids and lipid-like molecules	Steroids and steroid derivatives	460.269	M+NH4	C26H34O6	6.281	0.0352191	0	55.4	-1.74213	470-37-1	Steroid lactones	6.2594	6.19	6.0984	6.4492	6.5918	6.5714	6.4559	6.494	6.5778	6.9539	6.8439	6.8241	6.5223	6.4944	6.5199
pos_2305	9-Octadecenamide	metab_1347	-	-	-	C19670	HMDB0002117;HMDB0247607	pos	-	-	-	-	Lipids and lipid-like molecules	Fatty Acyls	304.263	M+Na	C18H35NO	6.2493	0.0626041	0	30.9	6.46252	301-02-0	Fatty amides	5.15	4.6257	5.1112	4.2149	3.8689	4.0608	4.2139	4.381	4.6834	3.8784	3.868	3.8653	4.3845	4.3893	4.433
pos_231	4-Methylcoumarin	metab_1351	-	-	-	-	HMDB0246508	pos	-	-	-	-	Phenylpropanoids and polyketides	Coumarins and derivatives	193.086	M+H, M+CH3OH+H	C10H8O2	4.3289	0.00427303	68.5	0	-1.47095	-	Not Available	4.239	4.2931	4.4992	5.3078	5.3142	5.136	3.988	4.0541	4.1558	5.2018	5.3489	5.2989	4.8262	4.8225	4.824
pos_2329	Panaxytriol	metab_1372	-	-	-	C16792	LMFA05000027;HMDB0031928	pos	-	-	-	-	Lipids and lipid-like molecules	Fatty Acyls	311.221	M+CH3OH+H	C17H26O3	6.2019	0.0207407	0	41.8	-2.83658	87005-03-6	Fatty alcohols	5.5642	5.3326	5.7256	5.1367	5.2397	5.217	4.6436	5.0711	5.0292	4.7663	4.7437	4.453	5.2864	5.2878	5.2714
pos_2363	20-Carboxy-leukotriene B4	metab_1407	-	map00590	Arachidonic acid metabolism	C05950	HMDB0006059;LMFA03020016;PW_C002644	pos	-	-	Metabolism	Lipid metabolism	Lipids and lipid-like molecules	Fatty Acyls	349.199	M+H-H2O	C20H30O6	6.1548	0.0168483	0	44.5	-6.65121	80434-82-8	Fatty acids and conjugates	5.7485	5.6806	5.9083	5.4255	5.4156	5.3898	5.4267	5.357	5.5074	5.3176	5.212	5.1921	5.556	5.5532	5.5421
pos_2377	Calanolide A	metab_1422	-	-	-	C09147	HMDB0249535	pos	-	-	-	-	Phenylpropanoids and polyketides	Coumarins and derivatives	371.182	M+H	C22H26O5	6.1072	0.0457773	0	46.5	-8.65278	142632-32-4	Pyranocoumarins	4.7017	5.1202	5.0247	4.5975	4.2154	4.1692	4.7435	4.6818	5.0056	4.5911	4.5573	4.6126	4.8049	4.8051	4.7701
pos_239	Gibberellin A53	metab_1435	-	map01100;map00904;map01110	Metabolic pathways;Diterpenoid biosynthesis;Biosynthesis of secondary metabolites	C06094	HMDB0036895;LMPR0104170007	pos	-	-	Metabolism;Metabolism;Metabolism	Global and overview maps;Metabolism of terpenoids and polyketides;Global and overview maps	Lipids and lipid-like molecules	Prenol lipids	331.19	M+H-H2O, M+H	C20H28O5	4.6551	0.0466896	0	41	-2.07662	51576-08-0	Diterpenoids	5.1281	5.1348	5.1712	4.9055	4.6253	4.7423	5.2549	5.011	5.0402	4.7805	4.9983	4.751	5.0048	5.0066	4.9701
pos_2390	2-Hydroxyestradiol	metab_1436	-	-	-	C05301	LMST02010027;HMDB0244190;HMDB0000338	pos	Steroids	18-Carbon atoms	-	-	Lipids and lipid-like molecules	Steroids and steroid derivatives	321.205	M+CH3OH+H	C18H24O3	6.0517	0.0184737	0	35.5	-2.85381	362-05-0	Estrane steroids	4.5222	4.9367	4.6255	4.3026	4.0847	4.0905	4.742	3.9797	4.6482	4.8291	4.7967	4.6422	4.6891	4.6777	4.6737
pos_2398	Cannabidivarin	metab_1444	-	-	-	C20217	HMDB0249588	pos	-	-	-	-	Lipids and lipid-like molecules	Prenol lipids	269.189	M+H-H2O	C19H26O2	6.0282	0.0400204	0	55.8	-2.08358	24274-48-4	Monoterpenoids	4.7916	4.8472	4.8315	4.6409	4.3505	4.5309	3.7555	4.109	4.0468	3.8053	3.9642	3.7922	4.4253	4.4592	4.4501
pos_2399	(Z)-N-Coumaroyl-5-hydroxyanthranilic acid	metab_1445	-	-	-	C08472	HMDB0038577	pos	-	-	-	-	Phenylpropanoids and polyketides	Cinnamic acids and derivatives	621.149	2M+Na	C16H13NO5	6.0047	0.0299845	0	61.1	1.83698	108605-70-5	Hydroxycinnamic acids and derivatives	5.4229	5.0015	5.1685	4.2582	4.168	4.1732	4.6626	4.4146	5.0383	4.1775	4.1672	4.1645	4.8781	4.8537	4.8744
pos_2400	2''-O-alpha-L-Rhamnosyl-6-C-fucosyl-3'-methoxyluteolin	metab_1448	-	-	-	-	HMDB0301974	pos	-	-	-	-	Phenylpropanoids and polyketides	Flavonoids	557.164	M+H-2H2O	C28H32O14	5.9967	0.0298556	0	36	-1.78203	-	Flavonoid glycosides	6.2366	6.2979	6.2942	6.0015	5.958	5.8797	6.0014	6.1342	6.2863	5.7889	5.885	5.906	6.1338	6.1354	6.112
pos_2401	3-[(3-(2-Carboxyethyl)-4-methylpyrrol-2-YL)methylene]-2-indolinone	metab_1449	-	-	-	-	HMDB0258526	pos	-	-	-	-	Organoheterocyclic compounds	Indoles and derivatives	319.107	M+Na	C17H16N2O3	5.9967	0.0412151	0	50.4	5.94718	-	Indolines	4.7566	4.4246	4.6462	4.3769	3.9794	4.1511	3.9092	3.409	4.7306	3.4714	3.461	3.4583	4.3805	4.3807	4.4113
pos_2404	Tricetin	metab_1452	-	map00941	Flavonoid biosynthesis	C10192	LMPK12110847;HMDB0029620	pos	-	-	Metabolism	Biosynthesis of other secondary metabolites	Phenylpropanoids and polyketides	Flavonoids	303.049	M+H	C15H10O7	5.9809	0.0137177	67.9	0	-2.19318	520-31-0	Flavones	5.3638	5.1492	5.142	6.0256	5.9216	5.9382	4.4306	4.7195	4.4987	5.7216	5.7838	5.7995	5.5083	5.5061	5.497
pos_2410	CDP-glucose	metab_1459	-	map01100;map00520;map00500;map01250	Metabolic pathways;Amino sugar and nucleotide sugar metabolism;Starch and sucrose metabolism;Biosynthesis of nucleotide sugars	C00501	HMDB0003369	pos	-	-	Metabolism;Metabolism;Metabolism;Metabolism	Global and overview maps;Carbohydrate metabolism;Carbohydrate metabolism;Global and overview maps	Nucleosides, nucleotides, and analogues	Pyrimidine nucleotides	583.107	M+NH4	C15H25N3O16P2	5.9575	0.0297353	0	59.6	3.84175	2906-23-2	Pyrimidine nucleotide sugars	6.085	5.9125	6.0716	5.5836	5.3939	5.368	6.2994	6.3969	6.2236	5.8558	5.8571	5.7333	6.0003	5.9803	5.9764
pos_2416	1-Hydroxy-3-methoxy-7-primeverosyloxyxanthone	metab_1465	-	-	-	-	HMDB0030870	pos	-	-	-	-	Organoheterocyclic compounds	Benzopyrans	597.122	M+2Na-H	C25H28O14	5.91	0.0963168	0	81.3	6.19432	85761-72-4	1-benzopyrans	5.1555	4.7386	5.0712	3.8953	3.8713	3.8764	5.3268	5.3984	5.2883	4.3558	4.4883	4.1196	4.8351	4.7593	4.833
pos_2418	(-)-Gallocatechin gallate	metab_1467	-	-	-	-	HMDB0243513	pos	-	-	-	-	Phenylpropanoids and polyketides	Flavonoids	423.07	M+H-2H2O	C22H18O11	5.8943	0.0107215	0	69.6	-2.17873	-	Flavans	5.0959	5.25	4.8283	3.6252	3.6342	3.6393	5.1301	5.3511	5.1197	3.6437	3.6333	3.6307	4.8977	4.907	4.9033
pos_2422	20-Carboxyleukotriene B4	metab_1472	-	map00590	Arachidonic acid metabolism	C05950	HMDB0245560;HMDB0006059;HMDB0012641	pos	-	-	Metabolism	Lipid metabolism	Lipids and lipid-like molecules	Fatty Acyls	349.2	M+H-H2O	C20H30O6	5.8427	0.00684888	0	67.9	-2.38154	80434-82-8	Fatty acids and conjugates	4.9162	5.0458	4.8933	4.8252	4.5171	4.5959	4.8765	4.6336	4.815	4.6904	4.6276	4.629	4.7902	4.7918	4.796
pos_2423	Methenamine	metab_1473	-	-	-	-	HMDB0029598	pos	-	-	-	-	Organoheterocyclic compounds	Triazinanes	141.113	M+H	C6H12N4	5.8045	0.00918304	43.8	0	-1.43399	100-97-0	1,3,5-triazinanes	4.6667	4.7389	4.7257	4.9439	5.016	4.9496	4.7861	4.8646	4.8701	5.0149	5.0197	5.0464	4.8588	4.8511	4.8566
pos_2430	Naringenin	metab_1481	-	map00943;map01100;map00941;map01110	Isoflavonoid biosynthesis;Metabolic pathways;Flavonoid biosynthesis;Biosynthesis of secondary metabolites	C00509	HMDB0002670;LMPK12140001;MJDBOTE0001138	pos	-	-	Metabolism;Metabolism;Metabolism;Metabolism	Biosynthesis of other secondary metabolites;Global and overview maps;Biosynthesis of other secondary metabolites;Global and overview maps	Phenylpropanoids and polyketides	Flavonoids	273.075	M+H	C15H12O5	5.6958	0.00487037	95	0	-2.22324	480-41-1	Flavans	5.4749	5.2704	5.337	3.3535	3.7821	3.2972	5.3169	5.3571	5.3424	3.3016	3.3053	3.2885	5.1454	5.1411	5.1431
pos_2432	Gibberellin A14	metab_1483	-	map01100;map00904;map01110	Metabolic pathways;Diterpenoid biosynthesis;Biosynthesis of secondary metabolites	C11858	HMDB0303454;LMPR0104170015	pos	-	-	Metabolism;Metabolism;Metabolism	Global and overview maps;Metabolism of terpenoids and polyketides;Global and overview maps	Lipids and lipid-like molecules	Prenol lipids	349.2	M+H	C20H28O5	5.6563	0.112086	0	76.3	-2.43655	4955-22-0	Diterpenoids	4.8963	4.9099	5.0532	4.7242	4.5582	4.5788	4.7589	4.5417	4.4734	4.5394	4.5053	4.376	4.7804	4.698	4.6991
pos_2444	Alpha-(1,2-Dihydroxyethyl)-1,2,3,4-tetrahydro-7-hydroxy-9-methoxy-3,4-dioxocyclopenta[c][1]benzopyran-6-acetaldehyde	metab_1494	-	-	-	C19592	HMDB0062442	pos	-	-	-	-	Phenylpropanoids and polyketides	Coumarins and derivatives	331.08	M+H-H2O	C17H16O8	5.5373	0.0418668	0	84.6	-2.44838	-	Not Available	4.9868	5.0572	5.0759	4.6979	4.2919	4.4892	5.0902	5.0857	5.0368	4.8463	4.7988	4.7422	4.958	4.9595	4.9269
pos_2447	Niflumic Acid	metab_1497	-	-	-	C13698	HMDB0015573	pos	-	-	-	-	Benzenoids	Benzene and substituted derivatives	565.133	2M+H	C13H9F3N2O2	5.5131	0.0495772	0	67.4	4.26372	4394-00-7	Trifluoromethylbenzenes	3.624	3.4996	3.4974	5.5797	5.7487	5.6444	3.4768	3.6186	3.5086	5.0964	5.0663	5.0794	4.8393	4.8219	4.7962
pos_245	1-O-Sinapoylglucose	metab_1500	-	-	-	-	HMDB0041175	pos	-	-	-	-	Phenylpropanoids and polyketides	Cinnamic acids and derivatives	369.117	M+H-H2O, M+H	C17H22O10	4.8538	0.0346309	0	58.3	-1.81669	-	Hydroxycinnamic acids and derivatives	5.6952	5.7923	5.6596	5.2925	4.6428	5.0201	5.8719	5.8592	5.8533	5.2515	5.4424	5.2872	5.6444	5.6206	5.6171
pos_2454	5-Aminoimidazole ribonucleotide	metab_1505	-	map01100;map01110;map00230;map01240;map00730;map00860	Metabolic pathways;Biosynthesis of secondary metabolites;Purine metabolism;Biosynthesis of cofactors;Thiamine metabolism;Porphyrin metabolism	C03373	HMDB0001235;PW_C000955	pos	-	-	Metabolism;Metabolism;Metabolism;Metabolism;Metabolism;Metabolism	Global and overview maps;Global and overview maps;Nucleotide metabolism;Global and overview maps;Metabolism of cofactors and vitamins;Metabolism of cofactors and vitamins	Organic oxygen compounds	Organooxygen compounds	313.091	M+NH4	C8H14N3O7P	5.4416	0.0379568	0	54.9	0.535154	25635-88-5	Carbohydrates and carbohydrate conjugates	4.507	4.5071	4.6492	3.67	3.679	3.6842	4.9261	4.6998	4.9274	4.2736	4.3848	4.395	4.5939	4.5667	4.5648
pos_2459	(2R,3S)-Piscidic acid	metab_1509	-	-	-	-	HMDB0030809	pos	-	-	-	-	Phenylpropanoids and polyketides	Phenylpropanoic acids	221.044	M+H-2H2O	C11H12O7	5.3943	0.0153173	0	61.1	-1.40304	35388-57-9	Not Available	3.9259	3.9271	3.8386	4.5782	4.7053	4.7103	4.0324	4.0343	4.0705	4.7396	4.6739	4.6725	4.3247	4.3158	4.3118
pos_2463	Eutypine	metab_1514	-	-	-	C08448	HMDB0301834	pos	-	-	-	-	Organic oxygen compounds	Organooxygen compounds	219.101	M+CH3OH+H	C12H10O2	5.3625	0.015866	0	35.8	-2.27484	121007-17-8	Carbonyl compounds	4.535	4.4864	4.2882	4.1389	3.9391	3.8713	4.235	4.4573	4.4826	3.5133	3.5492	3.6614	4.2773	4.2908	4.2868
pos_2464	2-aceto-2-hydroxy-butanoate	metab_1515	-	-	-	-	HMDB0304056	pos	-	-	-	-	Organic acids and derivatives	Keto acids and derivatives	313.091	2M+Na	C6H9O4-	5.3386	0.0215012	0	61.7	5.73967	-	Short-chain keto acids and derivatives	4.5434	4.5393	4.5426	3.6682	3.6479	4.1463	4.9069	4.8381	5.0886	4.0568	4.4474	4.2236	4.6134	4.6243	4.6058
pos_2472	Latrunculin a	metab_1524	-	-	-	C16901	HMDB0253989	pos	-	-	-	-	Phenylpropanoids and polyketides	Macrolides and analogues	454.225	M+CH3OH+H	C22H31NO5S	5.2117	0.0302901	0	55.1	-2.60496	76343-93-6	Not Available	4.5535	4.967	5.1733	3.528	3.537	3.5422	4.1557	3.4738	4.8111	3.5465	3.5362	3.5335	4.3975	4.3783	4.3726
pos_2475	Prostaglandin D3	metab_1527	-	-	-	C13802	HMDB0003034;LMFA03010142	pos	-	-	-	-	Lipids and lipid-like molecules	Fatty Acyls	333.205	M+H-H2O	C20H30O5	5.1958	0.0142083	0	69.2	-2.16892	71902-47-1	Eicosanoids	5.3936	5.7483	5.712	5.1913	5.0599	5.0889	5.4473	5.1187	5.5215	5.1178	5.1958	4.9698	5.4242	5.4261	5.4146
pos_2476	Didanosine	metab_1528	-	-	-	C06953	PW_C009350;HMDB0015037	pos	-	-	-	-	Nucleosides, nucleotides, and analogues	Purine nucleosides	275.054	M+K	C10H12N4O3	5.1958	0.00443797	0	61.3	1.11291	69655-05-6	Purine 2'',3''-dideoxyribonucleosides	4.5668	4.4326	5.138	3.7336	3.7427	3.7478	3.7024	3.6794	4.2793	3.7522	3.7418	3.7392	4.3058	4.3072	4.3034
pos_2479	Methoxsalen	metab_1531	-	map01110;map00999	Biosynthesis of secondary metabolites;Biosynthesis of various plant secondary metabolites	C01864	HMDB0014693;MJDBOTE0001449	pos	-	-	Metabolism;Metabolism	Global and overview maps;Biosynthesis of other secondary metabolites	Phenylpropanoids and polyketides	Coumarins and derivatives	249.075	M+CH3OH+H	C12H8O4	5.1878	0.0600735	49.1	0	-2.34571	298-81-7	Furanocoumarins	4.5811	4.4828	5.047	3.7017	3.7108	3.7159	3.9222	3.6476	4.4402	3.7203	3.7099	3.7073	4.2569	4.2581	4.2115
pos_248	Gerberinside	metab_1532	-	-	-	-	-	pos	-	-	-	-	-	-	339.107	M+H-2H2O, M+H	C16H18O8	5.1322	0.0120238	72.9	0	-2.11496	-	-	5.4532	5.6259	5.5469	5.3281	4.8746	5.0651	5.649	5.5975	5.6919	5.2126	5.399	5.2417	5.5117	5.5053	5.5014
pos_2483	Citpressine II	metab_1536	-	-	-	-	HMDB0029324	pos	-	-	-	-	Organoheterocyclic compounds	Quinolines and derivatives	333.147	M+NH4	C17H17NO5	5.1481	0.0359402	0	36.9	8.51889	81525-59-9	Benzoquinolines	3.09	3.35	3.1364	5.351	5.6848	5.6767	3.1158	3.0928	3.1475	5.2999	5.484	5.0904	5.0266	5.0022	4.998
pos_2488	Eriodictyol 7-(6-trans-p-coumaroylglucoside)	metab_1541	-	-	-	-	HMDB0039922	pos	-	-	-	-	Phenylpropanoids and polyketides	Flavonoids	597.159	M+H	C30H28O13	5.1004	0.061912	0	64.6	-2.22533	-	Flavonoid glycosides	5.8292	6.0021	5.8383	5.1012	5.0342	5.026	5.5393	5.563	5.5059	3.9586	3.9482	3.9455	5.6126	5.6145	5.5661
pos_2489	Resolvin E2	metab_1542	-	-	-	C18173	HMDB0257163;LMFA03140011	pos	-	-	-	-	Lipids and lipid-like molecules	Fatty Acyls	299.2	M+H-2H2O	C20H30O4	5.1004	0.0232414	0	86.5	-2.08308	-	Eicosanoids	4.6596	4.9458	4.8228	4.1455	3.596	4.1147	4.4581	3.8293	4.4954	3.6055	3.6674	3.5925	4.4875	4.4898	4.4711
pos_2494	2-(S-Glutathionyl)acetyl glutathione	metab_1548	-	-	-	C14863	HMDB0060343	pos	-	-	-	-	Organic acids and derivatives	Carboxylic acids and derivatives	655.165	M+H	C22H34N6O13S2	5.0368	0.0354128	0	65.2	-7.6693	-	Amino acids, peptides, and analogues	5.9632	5.9423	5.9805	4.6176	4.9243	4.2333	5.6179	5.7029	5.8122	4.4127	4.5606	4.5295	5.6716	5.6509	5.6418
pos_2496	Rhamnazin 3-rutinoside	metab_1550	-	-	-	C17441	HMDB0037467;LMPK12112634	pos	-	-	-	-	Phenylpropanoids and polyketides	Flavonoids	639.191	M+H	C29H34O16	5.0209	0.0231095	0	59.5	-1.7529	64527-08-8	Flavonoid glycosides	4.9651	5.0928	4.8139	4.6431	4.0879	4.4139	5.5673	5.5066	5.3239	5.189	5.0999	5.0905	5.0784	5.0808	5.0622
pos_2497	5'-Deoxy-5'-fluorouridine	metab_1551	-	-	-	C12739	HMDB0060406;HMDB0246881	pos	-	-	-	-	Nucleosides, nucleotides, and analogues	5''-deoxyribonucleosides	493.133	2M+H	C9H11FN2O5	5.0129	0.0441329	0	46.9	-9.10916	-	Not Available	4.6638	4.7117	4.9286	3.9598	3.7308	3.7316	5.2451	5.3132	5.1854	4.7886	4.7795	5.1417	4.8893	4.8593	4.8542
pos_2498	Quercetin 3,7-Dimethyl Ether	metab_1552	-	map01110;map00944	Biosynthesis of secondary metabolites;Flavone and flavonol biosynthesis	C01265	HMDB0029263;LMPK12112731	pos	-	-	Metabolism;Metabolism	Global and overview maps;Biosynthesis of other secondary metabolites	Phenylpropanoids and polyketides	Flavonoids	331.08	M+H	C17H14O7	5.0129	0.00895702	66	0	-2.38125	2068-02-02	O-methylated flavonoids	5.2427	5.2151	5.3223	4.9103	4.723	4.7483	5.6786	5.6988	5.5777	5.2623	5.3756	5.6208	5.4095	5.4056	5.4017
pos_2503	Geranic Acid	metab_1559	-	map01110	Biosynthesis of secondary metabolites	C16461	HMDB0304369;LMFA01030784;HMDB0036103	pos	-	-	Metabolism	Global and overview maps	Lipids and lipid-like molecules	Prenol lipids	186.149	M+NH4	C10H16O2	4.9972	0.0377121	30.5	0	-1.73586	459-80-3	Monoterpenoids	4.2743	4.3497	4.5229	4.8134	4.6725	4.6888	4.4174	4.4105	4.4269	4.7168	4.689	4.8242	4.5358	4.5662	4.5623
pos_2504	Ferulic Acid	metab_1560	-	map01100;map00940;map01110	Metabolic pathways;Phenylpropanoid biosynthesis;Biosynthesis of secondary metabolites	C01494	HMDB0000954;MJDBOTE0000325	pos	-	-	Metabolism;Metabolism;Metabolism	Global and overview maps;Biosynthesis of other secondary metabolites;Global and overview maps	Phenylpropanoids and polyketides	Cinnamic acids and derivatives	177.054	M+H-H2O	C10H10O4	4.9972	0.00534211	90.6	0	-1.33641	537-98-4	Hydroxycinnamic acids and derivatives	5.5582	5.6199	5.6069	5.3914	4.91	5.0795	5.7221	5.7067	5.7114	5.3002	5.3825	5.2767	5.5191	5.5187	5.5149
pos_2505	Genipic acid	metab_1561	-	-	-	-	HMDB0036072	pos	-	-	-	-	Organoheterocyclic compounds	Dihydrofurans	149.06	M+H-2H2O	C9H12O4	4.9972	0.0150378	0	32.2	-0.918881	6902-76-7	Not Available	4.0304	4.0287	4.0541	3.7376	3.1565	3.5247	4.172	4.1491	4.1787	3.4339	3.9499	3.0944	3.9628	3.9729	3.9607
pos_2508	O-O-glucuronide rosiglitazone	metab_1564	-	-	-	-	PW_C040634;HMDB0060857	pos	-	-	-	-	Organic oxygen compounds	Organooxygen compounds	613.154	M+ACN+Na	C24H27N3O10S	4.9494	0.0490104	0	74.9	-6.31531	-	Carbohydrates and carbohydrate conjugates	5.5992	5.87	5.7011	4.6216	4.772	4.4965	5.7679	5.6082	5.7645	4.1443	4.5761	4.2531	5.5503	5.5158	5.5123
pos_2511	4-coumaroylshikimate	metab_1568	-	map01100;map00941;map00940;map01110;map00945	Metabolic pathways;Flavonoid biosynthesis;Phenylpropanoid biosynthesis;Biosynthesis of secondary metabolites;Stilbenoid, diarylheptanoid and gingerol biosynthesis	C02947	HMDB0304174	pos	-	-	Metabolism;Metabolism;Metabolism;Metabolism;Metabolism	Global and overview maps;Biosynthesis of other secondary metabolites;Biosynthesis of other secondary metabolites;Global and overview maps;Biosynthesis of other secondary metabolites	Phenylpropanoids and polyketides	Cinnamic acids and derivatives	641.185	2M+H	C16H16O7	4.9014	0.0302567	0	47.2	-2.16578	-	Hydroxycinnamic acids and derivatives	5.7671	5.4683	5.5618	4.4886	4.4409	4.2705	5.0821	5.0061	5.1403	4.2749	4.2645	4.2618	5.2863	5.2667	5.2616
pos_2512	5-p-Coumaroylquinic acid	metab_1569	-	map00940;map00941;map01110;map00945	Phenylpropanoid biosynthesis;Flavonoid biosynthesis;Biosynthesis of secondary metabolites;Stilbenoid, diarylheptanoid and gingerol biosynthesis	C12208	HMDB0301709	pos	-	-	Metabolism;Metabolism;Metabolism;Metabolism	Biosynthesis of other secondary metabolites;Biosynthesis of other secondary metabolites;Global and overview maps;Biosynthesis of other secondary metabolites	Organic oxygen compounds	Organooxygen compounds	339.107	M+H	C16H18O8	4.8934	0.0273336	0	58.7	-1.91046	-	Alcohols and polyols	4.9441	5.0268	5.0266	4.5148	3.734	4.3071	4.7884	4.9194	4.8719	4.2596	4.5791	4.1991	4.8036	4.782	4.8017
pos_2514	Domoic acid	metab_1571	-	-	-	C13732	HMDB0033939	pos	-	-	-	-	Organic acids and derivatives	Carboxylic acids and derivatives	276.126	M+H-2H2O	C15H21NO6	4.8696	0.0259064	0	44.5	9.39452	14277-97-5	Amino acids, peptides, and analogues	3.3319	3.3805	3.3783	5.0523	5.5178	5.0546	3.3577	3.3347	3.3894	4.5909	4.9446	4.7559	4.6023	4.5972	4.5806
pos_2515	Scopoletin	metab_1572	-	map01110;map00999	Biosynthesis of secondary metabolites;Biosynthesis of various plant secondary metabolites	C01752	HMDB0034344;MJDBOTE0001128	pos	-	-	Metabolism;Metabolism	Global and overview maps;Biosynthesis of other secondary metabolites	Phenylpropanoids and polyketides	Coumarins and derivatives	175.039	M+H-H2O	C10H8O4	4.8617	0.0191157	0	48.1	-1.53622	92-61-5	Hydroxycoumarins	4.0873	4.1609	4.0771	2.9474	2.9565	2.9616	4.2507	4.3266	4.2964	3.3082	3.642	3.5384	4.0361	4.0376	4.0224
pos_2516	Sinapic Acid	metab_1573	-	map01100;map00940;map01110	Metabolic pathways;Phenylpropanoid biosynthesis;Biosynthesis of secondary metabolites	C00482	HMDB0032616;HMDB0034069;MJDBOTE0001099	pos	-	-	Metabolism;Metabolism;Metabolism	Global and overview maps;Biosynthesis of other secondary metabolites;Global and overview maps	Phenylpropanoids and polyketides	Cinnamic acids and derivatives	207.065	M+H-H2O	C11H12O5	4.8538	0.0165385	77.3	0	-1.47072	7361-90-2;530-59-6;7362-37-0;7362-37-0	Hydroxycinnamic acids and derivatives	5.4543	5.5132	5.4413	5.1308	4.717	4.9061	5.5759	5.5839	5.5973	5.0973	5.2298	5.068	5.3915	5.3813	5.3777
pos_2524	2-Acetolactate	metab_1582	-	-	-	C00900	HMDB0006833;LMFA01050472	pos	-	-	-	-	Organic acids and derivatives	Keto acids and derivatives	303.048	2M+K	C5H8O4	4.7824	0.0202309	0	34.4	0.0563973	-	Short-chain keto acids and derivatives	4.6072	4.5261	4.8806	5.1266	5.0399	4.9945	4.3311	4.3795	4.0118	4.6626	4.9078	4.7861	4.637	4.6393	4.623
pos_2525	Naringenin Chalcone	metab_1583	-	map01100;map00941;map01110	Metabolic pathways;Flavonoid biosynthesis;Biosynthesis of secondary metabolites	C06561	LMPK12120264;HMDB0029631;MJDBOTE0001299	pos	-	-	Metabolism;Metabolism;Metabolism	Global and overview maps;Biosynthesis of other secondary metabolites;Global and overview maps	Phenylpropanoids and polyketides	Linear 1,3-diarylpropanoids	273.075	M+H	C15H12O5	4.7824	0.0254019	87.8	0	-2.01163	5071-40-9;25515-46-2	Chalcones and dihydrochalcones	4.3422	3.9774	4.0966	4.7353	4.711	4.7072	4.2702	4.5818	3.992	4.5397	4.6282	4.5325	4.4163	4.418	4.3979
pos_2531	Dehydrozingerone	metab_1590	-	-	-	C17840	HMDB0032591	pos	-	-	-	-	Phenylpropanoids and polyketides	Cinnamic acids and derivatives	225.112	M+CH3OH+H	C11H12O3	4.7267	0.0317957	0	41.8	-2.27295	1080-12-2	Hydroxycinnamic acids and derivatives	4.737	4.7683	4.8815	4.0212	3.9298	4.0077	4.5768	4.6165	4.9234	3.6097	3.8	3.4992	4.4989	4.5011	4.476
pos_2535	Vicenin 2	metab_1594	-	-	-	C10195	LMPK12110218;HMDB0030708	pos	-	-	-	-	Phenylpropanoids and polyketides	Flavonoids	595.164	M+H	C27H30O15	4.6947	0.0342169	67	0	-2.19001	23666-13-9	Flavonoid glycosides	5.2065	5.0482	5.3485	4.9633	4.6168	4.8744	5.0688	5.0753	5.1632	4.0942	4.4231	4.6606	5.0314	5.0046	5.0297
pos_2538	Apigenin 7-[rhamnosyl-(1->2)-galacturonide]	metab_1597	-	-	-	-	HMDB0038847	pos	-	-	-	-	Phenylpropanoids and polyketides	Flavonoids	625.175	M+CH3OH+H	C27H28O15	4.6789	0.062114	0	77.1	-2.51772	124167-97-1	Flavonoid glycosides	5.5455	5.4761	5.5643	5.2974	5.1326	5.2917	5.0912	4.9192	5.3602	4.1113	4.4837	5.0284	5.2852	5.2874	5.2387
pos_2540	Capsianoside V	metab_1600	-	-	-	-	HMDB0030737	pos	-	-	-	-	Lipids and lipid-like molecules	Prenol lipids	556.311	M+ACN+H	C26H42O10	4.6551	0.195942	0	73.4	-2.12691	121924-06-9	Terpene glycosides	4.3892	4.5724	4.5682	5.1222	4.8945	5.0926	5.3943	5.1565	5.2534	5.5113	5.5058	5.5983	5.0212	5.1801	5.1781
pos_2543	2'-Hydroxygenistein	metab_1603	-	map00943	Isoflavonoid biosynthesis	C12134	HMDB0034014;LMPK12050327	pos	-	-	Metabolism	Biosynthesis of other secondary metabolites	Phenylpropanoids and polyketides	Isoflavonoids	319.081	M+CH3OH+H	C15H10O6	4.6471	0.0211562	0	63.9	-2.48784	1156-78-1	Isoflav-2-enes	5.8172	5.6952	5.7734	5.5054	5.503	5.4505	5.2224	5.3119	5.6692	4.7295	4.9208	4.7175	5.5227	5.5243	5.5076
pos_2544	Epigallocatechin gallate	metab_1604	-	-	-	C09731	HMDB0003153	pos	-	-	-	-	Phenylpropanoids and polyketides	Flavonoids	491.118	M+CH3OH+H	C22H18O11	4.6075	0.00466436	0	83.5	-1.9188	989-51-5	Flavans	5.6234	5.3954	5.4063	4.7097	4.8	4.7564	4.9515	5.2978	5.0227	4.7283	4.7179	4.7152	5.1564	5.1571	5.1533
pos_2547	Marrubiin	metab_1607	-	-	-	C09128	-	pos	-	-	-	-	-	-	333.205	M+H	C20H28O4	4.5755	0.0147888	78.8	0	-2.25923	465-92-9	-	4.5062	4.9421	4.8592	3.3235	3.3325	3.4161	4.515	4.3488	4.9119	3.835	3.4526	3.3936	4.5365	4.5274	4.5241
pos_2548	Meloside	metab_1608	-	map00944	Flavone and flavonol biosynthesis	C04199	HMDB0302583	pos	-	-	Metabolism	Biosynthesis of other secondary metabolites	Phenylpropanoids and polyketides	Flavonoids	595.164	M+H	C27H30O15	4.5676	0.0279713	0	70.4	-2.3429	-	Flavonoid glycosides	5.0518	5.1821	5.2142	4.8106	4.3122	4.4722	5.1404	5.13	5.1634	4.3217	4.5699	4.3911	4.9475	4.9293	4.9247
pos_2549	Capillarisin	metab_1609	-	-	-	C08999	HMDB0249594	pos	-	-	-	-	Phenylpropanoids and polyketides	Coumarins and derivatives	349.091	M+CH3OH+H	C16H12O7	4.5676	0.0619277	0	62.4	-2.50275	56365-38-9	Not Available	4.8918	5.0396	4.9957	4.6111	4.4768	4.5587	3.2967	4.2879	4.687	3.3465	3.3361	3.3335	4.6611	4.6169	4.6138
pos_255	Petunidin 3-glucoside	metab_1610	-	map00942	Anthocyanin biosynthesis	C12139	HMDB0038097;LMPK12010349	pos	-	-	Metabolism	Biosynthesis of other secondary metabolites	Phenylpropanoids and polyketides	Flavonoids	479.117	M+H, M+Na	C22H22O12	5.3704	0.011746	80.4	0	-2.08607	6988-81-4;71991-88-3;6988-81-4	Flavonoid glycosides	5.7759	5.6385	5.6645	5.4589	5.3157	5.3929	6.0075	5.9608	5.9371	5.4853	5.4478	5.4001	5.7176	5.7193	5.7097
pos_2550	S-Lactoylglutathione	metab_1611	-	map01100;map00620	Metabolic pathways;Pyruvate metabolism	C03451	PW_C000841;HMDB0001066	pos	-	-	Metabolism;Metabolism	Global and overview maps;Carbohydrate metabolism	Organic acids and derivatives	Carboxylic acids and derivatives	759.211	2M+H	C13H21N3O8S	4.512	0.0255205	0	57.1	-7.7593	25138-66-3	Amino acids, peptides, and analogues	5.9331	5.8716	5.8998	5.2303	5.2153	5.0799	4.8476	5.3293	4.8059	4.8239	4.8135	4.8109	5.5176	5.5009	5.4968
pos_2559	Flufenamic acid	metab_1620	-	-	-	C13038	HMDB0252331	pos	-	-	-	-	Benzenoids	Benzene and substituted derivatives	585.123	2M+Na	C14H10F3NO2	4.4802	0.0082972	0	38.9	1.7242	530-78-9	Benzoic acids and derivatives	5.7908	5.9914	5.7175	5.392	5.3158	5.4119	6.1575	6.1166	6.1963	5.1943	5.2736	5.1509	5.8344	5.831	5.8272
pos_2563	Kaempferol 3-O-beta-robinoside 7-O-alpha-L-rhamnopyranoside	metab_1625	-	-	-	C10178	HMDB0302847	pos	-	-	-	-	Phenylpropanoids and polyketides	Flavonoids	779.18	M+K	C33H40O19	4.4564	0.0175202	0	81.1	0.743636	-	Flavonoid glycosides	6.8349	6.7272	6.7398	5.9678	5.8801	5.9254	6.8117	6.6037	6.7061	5.4921	5.7972	5.5923	6.5692	6.5584	6.5546
pos_2564	Trans-Caffeic acid [apiosyl-(1->6)-glucosyl] ester	metab_1626	-	-	-	-	HMDB0033694	pos	-	-	-	-	Phenylpropanoids and polyketides	Cinnamic acids and derivatives	497.128	M+Na	C20H26O13	4.4245	0.0176106	0	47.2	2.86131	-	Hydroxycinnamic acids and derivatives	5.7466	5.7557	5.633	4.396	4.9998	4.6889	5.7261	5.9072	5.0438	4.4146	4.4042	4.4015	5.4702	5.4719	5.4578
pos_2565	2'-Deoxy-2'-methylenecytidine	metab_1627	-	-	-	-	HMDB0245533	pos	-	-	-	-	Organoheterocyclic compounds	Diazines	496.217	2M+NH4	C10H13N3O4	4.4086	0.136543	0	56.9	3.65916	-	Pyrimidines and pyrimidine derivatives	4.6855	5.0033	4.7658	3.9534	3.8916	3.6381	4.979	5.0737	5.0322	3.6424	3.6321	3.6294	4.487	4.5967	4.592
pos_2566	Theobromine	metab_1628	-	map01100;map01110;map00232	Metabolic pathways;Biosynthesis of secondary metabolites;Caffeine metabolism	C07480	PW_C001714;HMDB0002825;MJDBOTE0000804	pos	-	-	Metabolism;Metabolism;Metabolism	Global and overview maps;Global and overview maps;Biosynthesis of other secondary metabolites	Organoheterocyclic compounds	Imidazopyrimidines	219.028	M+K	C7H8N4O2	4.4086	0.0221942	0	30.2	2.75932	83-67-0	Purines and purine derivatives	4.9911	4.9923	4.804	3.1811	4.0797	3.7183	4.9438	5.1536	4.0715	3.2447	3.2716	3.1866	4.6099	4.5949	4.5921
pos_2567	Syringaldehyde	metab_1629	-	-	-	-	HMDB0258653	pos	-	-	-	-	Benzenoids	Phenols	183.065	M+H	C9H10O4	4.4007	0.0515427	35.6	0	-1.30365	-	Methoxyphenols	4.009	3.864	4.256	4.4287	4.3221	4.3875	3.9821	3.906	4.1351	4.4763	4.3727	4.3717	4.1946	4.2363	4.231
pos_2588	Neocarlinoside	metab_1648	-	-	-	C10109	HMDB0037408;LMPK12110490	pos	-	-	-	-	Phenylpropanoids and polyketides	Flavonoids	581.149	M+H	C26H28O15	4.1617	0.0183893	0	52.1	-2.02596	83151-89-7	Flavonoid glycosides	4.7109	5.1422	4.807	4.4415	4.4505	4.4557	5.5328	5.49	5.5586	5.0005	5.0998	5.1823	5.0923	5.0817	5.0767
pos_2589	Kaempferol 3-(2G-apiosylrobinobioside)	metab_1649	-	-	-	-	HMDB0039759	pos	-	-	-	-	Phenylpropanoids and polyketides	Flavonoids	765.165	M+K	C32H38O19	4.1537	0.0153935	0	78.7	1.04104	132185-73-0	Flavonoid glycosides	7.3298	7.2549	7.2884	6.6248	6.6096	6.6039	7.3645	7.2484	7.2274	6.4853	6.6673	6.4983	7.1297	7.1205	7.1167
pos_2590	Kaempferol-3-O-alpha-L-arabinoside	metab_1651	-	-	-	-	-	pos	-	-	-	-	-	-	419.096	M+H	C20H18O10	4.1537	0.008559	92.2	0	-2.29169	-	-	6.2458	5.949	6.028	5.2265	5.274	5.1195	5.7571	6.0591	5.3364	3.1701	4.4995	3.1571	5.8215	5.8178	5.814
pos_2597	Trifolin	metab_1658	-	map01110;map00944	Biosynthesis of secondary metabolites;Flavone and flavonol biosynthesis	C12626	LMPK12111663;HMDB0030864;HMDB0257804;HMDB0304745	pos	-	-	Metabolism;Metabolism	Global and overview maps;Biosynthesis of other secondary metabolites	Organoheterocyclic compounds	Pyrans	897.205	2M+H	C21H20O11	4.0821	0.0534005	0	54.5	-3.28762	23627-87-4	Pyranones and derivatives	6.4527	6.2851	6.0881	5.7333	5.6172	5.6166	6.0313	6.4762	5.9874	4.4102	5.1272	4.3994	6.092	6.0939	6.0522
pos_2600	Hypoglycin B	metab_1663	-	-	-	C08280	HMDB0029428	pos	-	-	-	-	Organic acids and derivatives	Carboxylic acids and derivatives	334.139	M+ACN+Na	C12H18N2O5	4.0662	0.114187	0	45.4	5.83132	502-37-4	Amino acids, peptides, and analogues	3.8324	3.5146	3.4513	4.499	4.5295	4.4138	4.1057	4.2852	3.4625	4.9213	4.624	4.1957	4.253	4.1541	4.2003
pos_2602	3-O-beta-D-Galactopyranuronosyl-D-galactose	metab_1665	-	-	-	-	HMDB0039726	pos	-	-	-	-	Organic oxygen compounds	Organooxygen compounds	751.149	2M+K	C12H20O12	4.0422	0.0136809	0	61.7	-7.28277	7268-75-9	Carbohydrates and carbohydrate conjugates	6.8271	6.7563	6.7443	6.0418	6.0208	5.9418	6.7839	6.7214	6.6837	5.8014	6.0548	5.7815	6.6082	6.6003	6.5965
pos_2612	Scytalone	metab_1675	-	-	-	C00779	-	pos	-	-	-	-	-	-	195.065	M+H	C10H10O4	3.9787	0.0368812	84.3	0	-1.31755	49598-85-8	-	4.1437	4.5653	4.4111	4.0639	3.9255	3.7181	4.8262	4.6829	4.8669	4.5893	4.6074	4.3529	4.5282	4.5542	4.5254
pos_2616	Mometasone	metab_1679	-	-	-	C07816	HMDB0014902	pos	-	-	-	-	Lipids and lipid-like molecules	Steroids and steroid derivatives	465.102	M+K	C22H28Cl2O4	3.9628	0.0929346	0	35.1	4.92576	105102-22-5	Pregnane steroids	4.1253	4.3258	4.298	4.972	5.0855	5.2413	4.1511	4.1281	4.1828	4.7002	4.1905	4.4499	4.3144	4.3242	4.3871
pos_2627	4-ethoxy-4-oxobutanoyl-CoA	metab_1691	-	-	-	-	HMDB0301557	pos	-	-	-	-	Not Available	Not Available	913.201	M+NH4	C27H44N7O19P3S	3.8515	0.0113038	0	54.2	4.64976	-	Not Available	6.4011	6.2373	6.2197	5.8659	5.8385	5.8659	5.6254	6.18	5.5046	4.6178	5.5912	4.873	6.0544	6.0486	6.0447
pos_2638	Kaempferol-3-O-rutinoside	metab_1703	-	map01110;map00944	Biosynthesis of secondary metabolites;Flavone and flavonol biosynthesis	C21833	HMDB0037574	pos	-	-	Metabolism;Metabolism	Global and overview maps;Biosynthesis of other secondary metabolites	Phenylpropanoids and polyketides	Flavonoids	595.165	M+H	C27H30O15	3.764	0.0206037	93.5	0	-1.96941	17297-56-2;17650-84-9	Flavonoid glycosides	7.3292	7.2149	7.4844	7.0388	7.0042	7.007	6.3969	6.7019	6.4479	5.7293	6.0003	5.7287	7.0551	7.0419	7.0381
pos_2644	Armillarisin A	metab_1710	-	-	-	-	HMDB0248606	pos	-	-	-	-	Phenylpropanoids and polyketides	Coumarins and derivatives	257.044	M+Na	C12H10O5	3.6923	0.0414317	0	40.8	7.62785	-	Hydroxycoumarins	5.6408	5.4768	5.5576	4.9757	4.9583	4.9642	5.2439	5.4993	4.9239	3.592	4.1532	3.579	5.2946	5.2965	5.3264
pos_2648	L-Epicatechol	metab_1714	-	map01100;map00941;map01110	Metabolic pathways;Flavonoid biosynthesis;Biosynthesis of secondary metabolites	C09727	HMDB0001871;MJDBOTE0001156	pos	-	-	Metabolism;Metabolism;Metabolism	Global and overview maps;Biosynthesis of other secondary metabolites;Global and overview maps	Phenylpropanoids and polyketides	Flavonoids	291.086	M+H	C15H14O6	3.6366	0.0233877	81.7	0	-2.32411	490-46-0	Flavans	4.1736	4.5352	4.269	4.7815	4.7951	4.6736	4.3779	4.2851	4.7706	4.0561	4.4582	3.9569	4.6282	4.6096	4.6264
pos_2652	Coumarin	metab_1719	-	map01110;map00999	Biosynthesis of secondary metabolites;Biosynthesis of various plant secondary metabolites	C05851	HMDB0001218	pos	-	-	Metabolism;Metabolism	Global and overview maps;Biosynthesis of other secondary metabolites	Phenylpropanoids and polyketides	Coumarins and derivatives	164.07	M+NH4	C9H6O2	3.581	0.0598761	79.5	0	-1.89722	91-64-5	Not Available	3.1861	3.2347	3.4423	4.6397	4.7144	4.6014	3.8119	3.189	4.2318	4.8147	4.8072	4.7913	4.1081	4.0607	4.1049
pos_2653	Succinic anhydride	metab_1720	-	-	-	C19524	HMDB0032523	pos	-	-	-	-	Organic acids and derivatives	Carboxylic acids and derivatives	223.023	2M+Na	C4H4O3	3.573	0.0274161	0	47.3	9.69709	108-30-5	Dicarboxylic acids and derivatives	3.5497	3.5983	3.5961	4.5179	4.3221	4.5826	3.5755	3.5525	3.6073	4.0627	3.9685	3.6122	4.0914	4.114	4.1096
pos_2655	Adipoyl-CoA	metab_1722	-	map01100	Metabolic pathways	C14143	HMDB0004047;LMFA07050284	pos	-	-	Metabolism	Global and overview maps	Lipids and lipid-like molecules	Fatty Acyls	913.2	M+NH4	C27H44N7O19P3S	3.5491	0.0459154	0	54.5	4.49459	25119-42-0	Fatty acyl thioesters	6.2409	6.1141	6.0271	5.4393	5.0232	5.1091	5.2128	5.8327	4.7894	4.1267	4.1163	4.1136	5.6792	5.681	5.6451
pos_2659	Kaempferol 3-O-Sophoroside	metab_1725	-	map01110;map00944	Biosynthesis of secondary metabolites;Flavone and flavonol biosynthesis	C12634	HMDB0304696	pos	-	-	Metabolism;Metabolism	Global and overview maps;Biosynthesis of other secondary metabolites	Phenylpropanoids and polyketides	Flavonoids	611.16	M+H	C27H30O16	3.5095	0.0309235	91.2	0	-1.83115	-	Flavonoid glycosides	7.3543	7.328	7.114	6.7818	6.7727	6.7913	6.5448	7.0578	6.3397	5.8273	6.1456	5.8663	7.0005	6.9797	6.9758
pos_2662	Gentiopicroside	metab_1729	-	map01110;map00902	Biosynthesis of secondary metabolites;Monoterpenoid biosynthesis	C09782	HMDB0252696	pos	-	-	Metabolism;Metabolism	Global and overview maps;Metabolism of terpenoids and polyketides	Organic oxygen compounds	Organooxygen compounds	751.184	2M+K	C16H20O9	3.4621	0.0216168	0	62.7	-1.18196	20831-76-9	Carbohydrates and carbohydrate conjugates	6.3584	6.443	6.1282	5.3237	5.3545	5.2991	5.7289	6.005	5.931	3.8948	3.8706	3.8679	5.9966	5.9886	5.9778
pos_2663	4-Hydroxy-3-(3-methyl-2-butenyl)acetophenone	metab_1730	-	-	-	C10702	HMDB0030770	pos	-	-	-	-	Organic oxygen compounds	Organooxygen compounds	222.148	M+NH4	C13H16O2	3.4621	0.0937803	0	52.4	-1.79369	26932-05-8	Carbonyl compounds	4.5271	4.686	4.6232	3.8611	3.4072	3.4124	4.0629	4.0937	3.7772	3.4167	3.4064	3.4037	4.299	4.2312	4.2291
pos_2664	1,2,5,6-Tetrahydro-4H-pyrrolo[3,2,1-ij]quinolin-4-one	metab_1731	-	-	-	C18487	HMDB0037113	pos	-	-	-	-	Organoheterocyclic compounds	Quinolines and derivatives	174.091	M+H	C11H11NO	3.4621	0.0220237	0	53	-1.41907	57369-32-1	Quinolones and derivatives	4.8359	4.3261	4.502	4.0309	3.7957	4.0888	3.099	3.0761	4.5346	3.4043	3.8045	3.5535	4.3037	4.2897	4.2856
pos_269	Dihydrocapsiate	metab_1757	-	-	-	C20203	HMDB0034781;HMDB0034780	pos	-	-	-	-	Benzenoids	Phenols	309.205	M+H-2H2O, M+H	C18H28O4	6.1548	0.0138274	0	45.8	-2.64667	-	Methoxyphenols	5.4407	5.1888	5.5472	4.9828	5.028	5.0682	4.6833	4.8835	4.9356	4.6611	4.5698	4.4308	5.0638	5.0753	5.0666
pos_2691	Bracteatin	metab_1759	-	-	-	C08577	LMPK12130044	pos	-	-	-	-	-	-	285.039	M+H-H2O	C15H10O7	3.3117	0.0184611	52	0	-2.00463	3260-50-2	-	4.9981	5.0781	5.0495	5.9557	5.8655	5.949	5.2894	5.4987	5.1322	5.5624	5.858	5.4515	5.5012	5.5037	5.5161
pos_2743	Phenylglyoxylic acid	metab_1816	-	map01100;map00360	Metabolic pathways;Phenylalanine metabolism	C02137	HMDB0001587	pos	-	-	Metabolism;Metabolism	Global and overview maps;Amino acid metabolism	Benzenoids	Benzene and substituted derivatives	133.028	M+H-H2O	C8H6O3	3.0973	0.0474355	0	36.7	-0.636276	611-73-4	Benzoyl derivatives	3.9825	4.0311	4.0289	4.531	4.6317	4.582	4.0083	3.9854	4.0401	4.3832	4.5403	4.3786	4.0399	4.0418	4.076
pos_2756	2-(3-Carboxy-3-(methylammonio)propyl)-L-histidine	metab_1829	-	-	-	C04692	HMDB0011654	pos	-	-	-	-	Organic acids and derivatives	Carboxylic acids and derivatives	304.176	M+CH3OH+H	C11H19N4O4+	3.0098	0.0244034	0	53.2	7.68673	-	Amino acids, peptides, and analogues	4.2891	4.4463	3.5593	5.58	5.2169	5.2958	4.3807	4.4706	4.3089	5.292	5.3311	5.3103	4.9728	4.957	4.9528
pos_2762	Thr Leu	metab_1836	-	-	-	-	-	pos	-	-	-	-	-	-	233.149	M+H	C10H20N2O4	2.9861	0.00614562	71.5	0	-1.92307	-	-	5.0066	4.5042	4.5802	4.1352	4.1246	4.2697	3.8385	2.9772	3.6705	3.049	3.0386	3.1984	4.2976	4.2997	4.3029
pos_2769	(S)-Hydroxyhexanoyl-CoA	metab_1843	-	map01100;map01212;map00062;map00071	Metabolic pathways;Fatty acid metabolism;Fatty acid elongation;Fatty acid degradation	C05268	HMDB0003942;PW_C002006	pos	-	-	Metabolism;Metabolism;Metabolism;Metabolism	Global and overview maps;Global and overview maps;Lipid metabolism;Lipid metabolism	Lipids and lipid-like molecules	Fatty Acyls	899.221	M+NH4	C27H46N7O18P3S	2.9383	0.0168183	0	61.9	4.85212	79171-47-4	Fatty acyl thioesters	5.8455	5.6848	5.4428	4.9991	5.0178	4.6402	3.8994	5.3056	4.9374	3.9492	4.0481	3.9361	5.2922	5.2787	5.2904
pos_2772	Imidazolone A	metab_1847	-	-	-	-	HMDB0253421	pos	-	-	-	-	Organic acids and derivatives	Carboxylic acids and derivatives	360.19	M+ACN+H	C12H22N4O6	2.8984	0.0481336	0	40	5.54005	-	Amino acids, peptides, and analogues	4.6982	4.5763	4.6352	4.8959	5.0662	4.8866	4.5846	4.6477	4.7534	4.8591	4.9712	5.0307	4.8406	4.807	4.803
pos_2789	Formyl-5-hydroxykynurenamine	metab_1864	-	map00380	Tryptophan metabolism	C05647	PW_C008135;HMDB0012948	pos	-	-	Metabolism	Amino acid metabolism	Organic oxygen compounds	Organooxygen compounds	191.081	M+H-H2O	C10H12N2O3	2.8109	0.00806303	0	72.2	-1.27583	958733-17-0	Carbonyl compounds	4.5928	5.0269	4.5663	3.6242	3.375	3.3801	4.8866	4.1827	4.7485	3.6012	3.5325	3.8608	4.5055	4.4989	4.5002
pos_2805	5-Hydroxypentanoic acid	metab_1883	-	-	-	C02804	HMDB0061927	pos	-	-	-	-	Lipids and lipid-like molecules	Fatty Acyls	254.161	2M+NH4	C5H10O3	2.771	0.0260405	0	47.3	3.53801	13392-69-3	Fatty acids and conjugates	4.1759	4.2588	4.1948	5.4413	5.2599	5.4376	4.6913	4.6882	4.5006	5.6816	5.6081	5.5346	5.0836	5.085	5.0646
pos_281	3-ketosphingosine	metab_1888	-	-	-	C06121	HMDB0245914;LMSP01010002	pos	-	-	-	-	Organic oxygen compounds	Organooxygen compounds	298.273	M+H-2H2O, M+H	C18H35NO2	6.3126	0.00276018	64.6	0	-1.99688	-	Carbonyl compounds	6.7009	6.7612	6.6987	6.4508	6.2948	6.3047	6.3785	6.3993	6.473	6.1072	6.0123	6.0775	6.4958	6.4939	6.4937
pos_2823	Gynocardin	metab_1903	-	-	-	C08331	HMDB0029913	pos	-	-	-	-	Organic oxygen compounds	Organooxygen compounds	286.092	M+H-H2O	C12H17NO8	2.7554	0.0105896	0	65.4	-1.83718	14332-17-3	Carbohydrates and carbohydrate conjugates	5.4769	5.6242	5.5435	5.3713	5.1488	5.0623	5.5633	5.6788	5.835	5.306	5.2425	5.2555	5.511	5.5125	5.5039
pos_2829	Terreic acid	metab_1909	-	-	-	-	HMDB0258836	pos	-	-	-	-	Organic oxygen compounds	Organooxygen compounds	187.06	M+CH3OH+H	C7H6O4	2.7554	0.0158005	0	35.1	-1.69501	-	Carbonyl compounds	4.9026	4.721	4.9602	4.6629	4.4101	4.5238	4.2111	4.3316	4.3628	4.1925	3.9684	3.867	4.6114	4.6216	4.6086
pos_2830	2-Hydroxyacetophenone	metab_1911	-	-	-	C07189	HMDB0032568;HMDB0245150	pos	-	-	-	-	Organic oxygen compounds	Organooxygen compounds	137.06	M+H	C8H8O2	2.7554	0.00688947	58.8	0	-1.01918	582-24-1;118-93-4	Carbonyl compounds	5.4933	5.7451	5.4997	4.9943	4.838	4.8803	6.1991	6.1202	6.1037	5.008	5.0731	4.897	5.8159	5.8175	5.8117
pos_2833	4-Methyl-5-Thiazoleethanol	metab_1914	-	map00730;map01100;map01240	Thiamine metabolism;Metabolic pathways;Biosynthesis of cofactors	C04294	HMDB0032985	pos	-	-	Metabolism;Metabolism;Metabolism	Metabolism of cofactors and vitamins;Global and overview maps;Global and overview maps	Organoheterocyclic compounds	Azoles	144.048	M+H	C6H9NOS	2.7554	0.0201878	73.1	0	-1.20743	137-00-8	Thiazoles	4.5184	4.4274	4.5563	5.1687	5.0301	5.111	4.5118	4.2953	4.3709	5.1393	5.1145	5.1083	4.7913	4.793	4.7769
pos_2837	N-hydroxy-L-tryptophan	metab_1918	-	-	-	C19716	HMDB0255152	pos	-	-	-	-	Organoheterocyclic compounds	Indoles and derivatives	203.081	M+H-H2O	C11H12N2O3	2.7474	0.0364003	0	56.5	-1.24328	-	Indolyl carboxylic acids and derivatives	3.365	3.2697	3.6218	3.081	3.0901	3.0952	4.8778	4.776	4.8649	4.6754	4.6466	4.7072	4.4469	4.4245	4.4167
pos_284	Phytosphingosine	metab_1921	-	map00600;map01100	Sphingolipid metabolism;Metabolic pathways	C12144	LMSP01030001;HMDB0004610	pos	-	-	Metabolism;Metabolism	Lipid metabolism;Global and overview maps	Organic nitrogen compounds	Organonitrogen compounds	318.3	M+H-H2O, M+H	C18H39NO3	6.3524	0.00453797	82.3	0	-2.14914	554-62-1	Amines	7.7904	7.7982	7.8356	7.2765	7.4578	7.5459	7.9862	7.8942	7.9785	7.469	7.4574	7.6232	7.7617	7.7624	7.7587
pos_2853	Pinolidoxin	metab_1936	-	-	-	C08503	HMDB0301836	pos	-	-	-	-	Organoheterocyclic compounds	Oxocins	383.144	M+2Na-H	C18H26O6	2.7155	0.0204347	0	45.7	0.0186016	152985-39-2	Not Available	4.8693	4.7333	5.0217	4.3706	4.375	4.3728	4.6927	4.5135	4.4943	4.2215	4.1117	4.0462	4.5987	4.6134	4.6148
pos_287	Sphinganine	metab_1954	-	map00600;map01100	Sphingolipid metabolism;Metabolic pathways	C00836	HMDB0000269;PW_C000184;HMDB0242634;LMSP01020001	pos	-	-	Metabolism;Metabolism	Lipid metabolism;Global and overview maps	Organic nitrogen compounds	Organonitrogen compounds	302.305	M+H-H2O, M+H	C18H39NO2	6.3922	0.0063606	83.5	0	-2.06195	764-22-7	Amines	6.6111	6.833	6.6603	6.3548	6.3696	6.4168	7.0639	6.9488	6.9153	6.4498	6.319	6.5283	6.729	6.7275	6.7237
pos_2883	4-(2-Amino-3-hydroxyphenyl)-2,4-dioxobutanoic acid	metab_1969	-	map00380	Tryptophan metabolism	C05645	HMDB0004083;PW_C002053	pos	-	-	Metabolism	Amino acid metabolism	Organic oxygen compounds	Organooxygen compounds	224.055	M+H	C10H9NO5	2.5079	0.0181829	0	49	-1.36754	857760-67-9	Carbonyl compounds	4.4168	4.1931	4.4326	4.6454	4.6427	4.8349	4.2001	4.1977	4.2931	4.6867	4.5997	4.7717	4.4984	4.5107	4.496
pos_2917	Epinine	metab_2007	-	-	-	C07453	HMDB0032020	pos	-	-	-	-	Benzenoids	Phenols	209.128	M+ACN+H	C9H13NO2	1.7468	0.0163747	0	32.4	-1.96605	501-15-5	Benzenediols	4.7528	4.9705	4.7472	3.7728	3.0869	3.6007	4.8202	4.8148	4.7314	3.223	3.4691	3.6407	4.6811	4.6712	4.6673
pos_2934	1,3-Butadiene	metab_2024	-	-	-	C16450	HMDB0041792	pos	-	-	-	-	Hydrocarbons	Unsaturated hydrocarbons	72.0813	M+NH4	C4H6	1.5156	0.0734948	0	48.4	9.62504	106-99-0	Olefins	3.2334	3.3909	3.5685	3.0427	3.0007	3.1446	3.132	3.3998	3.1508	3.2902	2.9481	3.1732	3.2764	3.2181	3.2726
pos_2942	4-Benzyl-2-methyl-1,2,4-thiadiazolidine-3,5-dione	metab_2033	-	-	-	-	HMDB0258758	pos	-	-	-	-	Benzenoids	Benzene and substituted derivatives	261.009	M+K	C10H10N2O2S	1.4518	0.0153143	0	36.5	-3.29323	-	Not Available	4.8099	5.0474	4.9527	5.512	5.4983	5.3916	4.4779	4.2772	3.7274	5.2044	5.094	5.323	4.9716	4.9846	4.9807
pos_2946	Niacinamide	metab_2037	-	map01100;map00760;map01240	Metabolic pathways;Nicotinate and nicotinamide metabolism;Biosynthesis of cofactors	C00153	HMDB0001406;PW_C001086	pos	Vitamins and cofactors	Vitamins	Metabolism;Metabolism;Metabolism	Global and overview maps;Metabolism of cofactors and vitamins;Global and overview maps	Organoheterocyclic compounds	Pyridines and derivatives	123.055	M+H	C6H6N2O	1.3722	0.00798731	48.8	0	0.117267	98-92-0	Pyridinecarboxylic acids and derivatives	4.8786	4.948	5.0062	5.7317	5.7243	5.7028	4.916	4.9106	4.9617	5.7478	5.756	5.7259	5.3571	5.3586	5.3637
pos_2954	Glucosidetathione	metab_2046	-	-	-	-	-	pos	-	-	-	-	-	-	308.09	M+H	C10H17N3O6S	1.285	0.00833818	89.4	0	-2.07379	-	-	3.2601	5.4776	3.3065	6.1599	6.3568	6.1289	3.2859	3.2629	4.1599	6.0044	6.376	6.0813	5.6486	5.6452	5.6414
pos_2964	1-Kestose	metab_2057	-	-	-	C03661	HMDB0011729;MJDBOTE0001231	pos	-	-	-	-	Organic oxygen compounds	Organooxygen compounds	522.202	M+NH4	C18H32O16	1.1977	0.0496736	70.1	0	-1.65044	470-69-9	Carbohydrates and carbohydrate conjugates	5.9265	5.9716	5.8728	5.5144	5.7514	5.5393	6.3583	6.318	6.4813	6.1896	6.245	5.7289	6.0913	6.0524	6.0892
pos_3049	L-Histidine	metab_2149	-	map01100;map01110;map02010;map00340;map00470;map01230;map00970;map00410	Metabolic pathways;Biosynthesis of secondary metabolites;ABC transporters;Histidine metabolism;D-Amino acid metabolism;Biosynthesis of amino acids;Aminoacyl-tRNA biosynthesis;beta-Alanine metabolism	C00135	PW_C000116;HMDB0000177;MJDBOTE0000427	pos	Peptides	Amino acids	Metabolism;Metabolism;Environmental Information Processing;Metabolism;Metabolism;Metabolism;Genetic Information Processing;Metabolism	Global and overview maps;Global and overview maps;Membrane transport;Amino acid metabolism;Metabolism of other amino acids;Global and overview maps;Translation;Metabolism of other amino acids	Organic acids and derivatives	Carboxylic acids and derivatives	156.077	M+H	C6H9N3O2	0.8501	0.0068394	79.9	0	-1.31421	71-00-1	Amino acids, peptides, and analogues	5.147	5.3615	5.2005	5.5662	5.46	5.5338	5.4943	5.6515	5.301	5.8026	5.7762	5.6998	5.4914	5.4972	5.4934
pos_3093	1-Naphthalenesulfonic acid, 3,4-dihydro-3,4-dioxo-	metab_2196	-	-	-	-	HMDB0245592	pos	-	-	-	-	Benzenoids	Naphthalenes	202.98	M+H-2H2O	C10H6O5S	0.7707	0.0226928	0	36.6	0.370176	-	Naphthoquinones	4.1279	4.0508	4.4369	4.7974	4.821	4.9919	3.8218	3.4812	3.1784	4.6266	4.5928	4.7808	4.4178	4.4142	4.3991
pos_325	Pegvaliase	metab_2321	-	-	-	-	HMDB0256204	pos	-	-	-	-	Organic acids and derivatives	Carboxylic acids and derivatives	341.208	M+H, M+Na	C15H30N2O5	6.8447	0.010516	0	30.1	9.52123	-	Amino acids, peptides, and analogues	5.9373	6.0848	5.7759	4.6411	4.0751	4.7765	5.2107	4.3963	5.8426	4.7099	3.872	3.8693	5.5732	5.5823	5.5784
pos_370	PA(22:0/20:5(5Z,8Z,11Z,14Z,17Z))	metab_2370	-	map01100;map00564;map01110;map00561;map04070	Metabolic pathways;Glycerophospholipid metabolism;Biosynthesis of secondary metabolites;Glycerolipid metabolism;Phosphatidylinositol signaling system	C00416	PW_C062680;LMGP10010719;HMDB0115258	pos	Lipids	Phospholipids	Metabolism;Metabolism;Metabolism;Metabolism;Environmental Information Processing	Global and overview maps;Lipid metabolism;Global and overview maps;Lipid metabolism;Signal transduction	Lipids and lipid-like molecules	Glycerophospholipids	801.547	M+NH4, M+Na	C45H79O8P	7.4394	0.00505229	0	72.6	8.33899	-	Glycerophosphates	6.4595	6.2701	6.251	5.3106	5.8363	5.9975	6.4922	6.3576	6.4294	5.2651	5.9577	6.1132	6.3631	6.3599	6.3589
pos_374	GPEtn(14:0/22:4)	metab_2374	-	map01100;map00564;map01110;map00563;map04136	Metabolic pathways;Glycerophospholipid metabolism;Biosynthesis of secondary metabolites;Glycosylphosphatidylinositol (GPI)-anchor biosynthesis;Autophagy - other	C00350	HMDB0008844	pos	Lipids	Phospholipids	Metabolism;Metabolism;Metabolism;Metabolism;Cellular Processes	Global and overview maps;Lipid metabolism;Global and overview maps;Glycan biosynthesis and metabolism;Transport and catabolism	Lipids and lipid-like molecules	Glycerophospholipids	762.503	M+H, M+Na	C41H74NO8P	7.527	0.0123704	91.7	0	-1.93502	-	Glycerophosphoethanolamines	7.0008	6.9995	6.8601	6.6683	6.6443	6.7137	6.8883	6.809	6.9455	6.6509	6.6149	6.8321	6.8997	6.8931	6.889
pos_41	Astragalin	metab_2414	-	map01110;map00944	Biosynthesis of secondary metabolites;Flavone and flavonol biosynthesis	C12249	LMPK12111725;HMDB0037429	pos	-	-	Metabolism;Metabolism	Global and overview maps;Biosynthesis of other secondary metabolites	Phenylpropanoids and polyketides	Flavonoids	449.107	M+H, 2M+H, M+Na	C21H20O11	3.7003	0.0026306	88.3	0	-2.16916	480-10-4	Flavonoid glycosides	9.0431	8.8712	8.9343	8.5023	8.5122	8.4883	8.6684	8.864	8.4325	7.9379	8.1225	7.9613	8.7457	8.7448	8.7434
pos_442	4-Ethyl-7,11-dimethyldodeca-trans-2-trans-6-1-o-trien-1-al	metab_2450	-	-	-	-	HMDB0302403	pos	-	-	-	-	Lipids and lipid-like molecules	Prenol lipids	252.232	M+H, M+NH4	C16H26O	6.5906	0.00971272	0	41.7	-1.36717	-	Monoterpenoids	5.3286	5.2483	5.5115	5.8044	5.6197	5.7111	5.3393	5.3359	5.4572	5.6434	5.7336	5.7742	5.5124	5.5139	5.5059
pos_475	16-B1-phytoprostane	metab_2485	-	-	-	-	HMDB0304634	pos	-	-	-	-	Lipids and lipid-like molecules	Fatty Acyls	291.195	M+H-H2O, M+H	C18H28O4	6.2258	0.0379803	0	68.6	-2.10512	-	Eicosanoids	5.9676	5.6699	5.9201	5.0608	5.0007	4.9717	5.2504	5.2159	5.3629	4.5078	4.3746	4.0611	5.5369	5.5076	5.5361
pos_494	Oxyphenbutazone	metab_2506	-	-	-	C19494	HMDB0256021	pos	-	-	-	-	Benzenoids	Phenols	369.117	M+H, M+2Na-H	C19H20N2O3	4.9972	0.00716079	0	45.8	-3.94749	129-20-4	1-hydroxy-2-unsubstituted benzenoids	6.1404	6.2195	6.1705	5.8677	5.1776	5.5259	6.2976	6.2674	6.2919	5.7726	5.8775	5.7634	6.0888	6.0865	6.0826
pos_495	Trans-p-Feruloyl-beta-D-glucopyranoside	metab_2507	-	-	-	C17759	HMDB0301717;HMDB0301952	pos	-	-	-	-	Organic oxygen compounds	Organooxygen compounds	339.107	M+H-H2O, M+H	C16H20O9	4.9972	0.0155708	0	48.3	-1.88896	537-98-4	Carbohydrates and carbohydrate conjugates	5.5691	5.6441	5.5784	5.353	4.7156	4.8794	5.6998	5.7065	5.6724	5.1564	5.2523	5.1515	5.4849	5.4722	5.4827
pos_496	Juglone	metab_2508	-	-	-	C03840	HMDB0030773;MJDBOTE0001015	pos	-	-	-	-	Benzenoids	Naphthalenes	207.065	M+H, M+CH3OH+H	C10H6O3	4.9972	0.0045978	0	36.8	-1.98129	481-39-0	Naphthoquinones	5.8069	5.8467	5.8844	5.5576	5.2356	5.352	5.9101	5.9347	5.9694	5.556	5.605	5.5082	5.763	5.7659	5.7621
pos_510	Piperonal	metab_2524	-	-	-	C10812	HMDB0032612	pos	-	-	-	-	Organoheterocyclic compounds	Benzodioxoles	151.039	M+H-H2O, M+H	C8H6O3	2.7554	0.0250526	39.2	0	-2.38788	120-57-0	Not Available	3.7979	3.4632	3.9516	4.3982	5.1359	5.1477	3.29	3.4508	3.4223	3.3863	5.0903	3.426	4.613	4.6134	4.6319
pos_55	5,6-epoxy,18R-HEPE	metab_2567	-	-	-	C18175	HMDB0062410	pos	-	-	-	-	Lipids and lipid-like molecules	Fatty Acyls	333.204	M+H, 2M+Na, M+Na	C20H28O4	6.2337	0.00698114	0	49.5	-5.08229	-	Fatty alcohols	6.4845	6.5156	6.8395	5.8412	5.7755	5.8587	6.248	5.8397	6.9543	5.6779	5.4617	5.5384	6.4388	6.4328	6.4366
pos_589	Dihydro-2(3H)-thiophenone	metab_2610	-	-	-	-	HMDB0031253	pos	-	-	-	-	Organoheterocyclic compounds	Thiolanes	227.016	2M+Na	C4H6OS	0.8024	0.0440483	0	33.6	-4.63283	1003-10-7	Not Available	4.3721	4.0853	4.2864	4.8766	4.9752	5.1059	3.8658	3.6656	3.7203	4.7997	4.6904	4.8803	4.4921	4.4935	4.4593
pos_597	(2R,3R,4S,5R)-2-(5,6-Dichlorobenzimidazol-1-yl)-5-(hydroxymethyl)oxolane-3,4-diol	metab_2619	-	-	-	-	HMDB0242505	pos	-	-	-	-	Nucleosides, nucleotides, and analogues	Benzimidazole ribonucleosides and ribonucleotides	301.016	M+H-H2O	C12H12Cl2N2O4	0.8182	0.0288555	0	53.5	6.85427	-	Not Available	4.615	4.4945	4.8039	5.1556	5.2703	5.3666	4.1924	4.067	3.8931	5.024	4.9965	5.1781	4.8576	4.8385	4.8343
pos_610	2-(2-Cyclopropylhydrazinyl)-9-[(2R,5R)-3,4-dihydroxy-5-(hydroxymethyl)oxolan-2-yl]-1H-purin-6-one	metab_2635	-	-	-	-	HMDB0255354	pos	-	-	-	-	Nucleosides, nucleotides, and analogues	Purine nucleosides	192.055	M+2Na	C13H18N6O5	0.8501	0.0332671	0	35.3	-6.47953	-	Not Available	4.8525	5.0356	4.9293	5.2839	5.3625	5.2208	4.9163	4.8714	4.7389	5.1858	5.2029	5.2273	5.0791	5.0553	5.0818
pos_625	2,3-Diaminopyridine	metab_2651	-	-	-	-	-	pos	-	-	-	-	-	-	110.071	M+H	C5H7N3	0.8737	0.0607253	33.6	0	1.75835	-	-	4.2954	4.7571	4.4863	4.9476	4.8708	4.9201	4.7942	5.0968	4.4527	5.2422	5.2273	5.1266	4.8387	4.8869	4.8832
pos_644	Phosphate	metab_2669	-	map00195;map02010;map00190	Photosynthesis;ABC transporters;Oxidative phosphorylation	C00009	HMDB0001429;PW_C001104	pos	-	-	Metabolism;Environmental Information Processing;Metabolism	Energy metabolism;Membrane transport;Energy metabolism	Homogeneous non-metal compounds	Non-metal oxoanionic compounds	98.9845	M+H	H3O4P	0.9448	0.0156391	51.4	0	3.28543	14265-44-2;7664-38-2	Non-metal phosphates	6.0906	5.9597	6.1925	6.3869	6.4168	6.5886	5.9061	5.8638	5.9374	6.4393	6.4299	6.507	6.2039	6.2172	6.2132
pos_681	Adenosine 3'-monophosphate	metab_2708	-	map01100;map00230	Metabolic pathways;Purine metabolism	C01367	HMDB0003540	pos	-	-	Metabolism;Metabolism	Global and overview maps;Nucleotide metabolism	Nucleosides, nucleotides, and analogues	Ribonucleoside 3''-phosphates	348.07	M+H	C10H14N5O7P	1.285	0.0134407	90	0	-2.05533	84-21-9	Not Available	4.571	4.5109	4.4524	5.3598	5.5267	5.4947	4.1088	3.9563	4.2354	5.1601	5.4646	5.0977	5.0012	4.9936	4.9898
pos_695	6-Methylthiopurine ribonucleoside	metab_2723	-	-	-	-	HMDB0247092	pos	-	-	-	-	Nucleosides, nucleotides, and analogues	Purine nucleotides	212.007	M+2Na	C11H15N4O7PS	1.4756	0.00824393	0	35.5	-9.17677	-	Purine ribonucleotides	4.3257	4.6508	4.4569	5.4354	5.4305	5.3273	3.8824	3.5894	3.6441	4.9855	4.9015	5.1813	4.7042	4.7013	4.7084
pos_705	Perseitol Heptaacetate	metab_2735	-	-	-	-	-	pos	-	-	-	-	-	-	524.196	M+NH4	C21H30O14	1.7069	0.00635132	41.4	0	-1.76818	-	-	6.0977	6.2805	6.1663	5.888	5.4311	5.5093	6.3772	6.2665	6.4396	5.8518	5.9289	5.7143	6.113	6.1145	6.1183
pos_710	Maysin 3'-methyl ether	metab_2741	-	-	-	-	HMDB0037420	pos	-	-	-	-	Phenylpropanoids and polyketides	Flavonoids	307.083	M+H+Na	C28H30O14	1.7149	0.00639888	0	50.5	8.8447	74158-05-7	Flavonoid glycosides	5.3299	5.1973	5.3723	6.4433	6.4761	6.5112	3.9058	4.7302	4.9556	6.4143	6.5565	6.1838	6.0141	6.0153	6.01
pos_715	2-(Malonylamino)benzoic acid	metab_2746	-	-	-	C03147	HMDB0039495	pos	-	-	-	-	Benzenoids	Benzene and substituted derivatives	224.055	M+H	C10H9NO5	1.7548	0.019467	0	43.9	-1.77654	53947-84-5	Benzoic acids and derivatives	4.5385	4.3544	4.5106	4.7522	4.7873	4.9738	4.3691	4.2304	3.9293	4.7479	4.5786	4.8703	4.5239	4.5402	4.5363
pos_728	2-Hydroxyterephthalic acid	metab_2760	-	-	-	-	HMDB0033137;HMDB0245171	pos	-	-	-	-	Organic oxygen compounds	Organooxygen compounds	224.055	M+ACN+H	C8H6O5	2.1639	0.0216737	0	42.2	-2.12825	10019-60-0	Carbohydrates and carbohydrate conjugates	5.2303	5.0411	5.238	5.4599	5.5102	5.7096	4.9818	4.9314	4.7469	5.422	5.3016	5.5456	5.2365	5.2545	5.2506
pos_744	Dhurrin 6'-glucoside	metab_2778	-	-	-	-	HMDB0029776	pos	-	-	-	-	Organic oxygen compounds	Organooxygen compounds	506.186	M+CH3OH+H	C20H27NO12	2.5159	0.0102989	0	35.8	-1.71639	-	Carbohydrates and carbohydrate conjugates	4.3322	5.0747	4.283	3.3873	3.3963	3.4014	6.1478	6.1284	6.0999	3.4058	3.533	3.3928	5.4901	5.4851	5.4812
pos_772	7-Deaza-2'-deoxyguanosine	metab_2809	-	-	-	-	HMDB0247243	pos	-	-	-	-	Organoheterocyclic compounds	Pyrrolopyrimidines	305.065	M+K	C11H14N4O4	2.7314	0.0312421	0	66.4	0.69117	-	Pyrrolo[2,3-d]pyrimidines	0.2691	4.0476	0.2911	5.4888	5.4761	5.5377	3.5148	3.3958	2.9882	4.8235	5.078	4.6781	4.7966	4.8187	4.7944
pos_779	Coniferaldehyde	metab_2816	-	map01100;map00940;map01110	Metabolic pathways;Phenylpropanoid biosynthesis;Biosynthesis of secondary metabolites	C02666	HMDB0141782	pos	-	-	Metabolism;Metabolism;Metabolism	Global and overview maps;Biosynthesis of other secondary metabolites;Global and overview maps	Benzenoids	Phenols	179.07	M+H	C10H10O3	2.7554	0.0101086	0	55.4	-1.39453	458-36-6;20649-42-7	Methoxyphenols	5.366	5.605	5.3211	4.3648	3.9347	4.2074	6.0953	6.0118	5.9953	4.386	4.6904	4.3569	5.6965	5.6916	5.6878
pos_783	Eleclazine	metab_2821	-	-	-	-	HMDB0251742	pos	-	-	-	-	Organoheterocyclic compounds	Benzoxazepines	448.144	M+CH3OH+H	C21H16F3N3O3	2.7554	0.0143536	0	47.1	-8.99384	-	Not Available	6.0358	6.1958	6.1095	5.9542	5.791	5.6042	6.2232	6.3604	6.5226	6.0219	5.9622	5.9429	6.1434	6.1528	6.141
pos_811	Lac Dye	metab_2852	-	-	-	-	HMDB0253936;HMDB0257108	pos	-	-	-	-	Organic oxygen compounds	Organooxygen compounds	610.197	M+2Na-H	C26H35N3O11	2.8427	0.0299896	0	66.1	-2.98736	-	Carbohydrates and carbohydrate conjugates	5.6126	5.7456	5.5546	5.4634	5.1343	4.9339	5.4586	5.4188	5.6859	5.1756	4.8881	5.1875	5.4909	5.4707	5.4668
pos_815	Fenvalerate	metab_2856	-	-	-	C10988	HMDB0031791	pos	-	-	-	-	Lipids and lipid-like molecules	Fatty Acyls	384.114	M+H-2H2O	C25H22ClNO3	2.8904	0.0302271	0	47.4	-1.8818	51630-58-1	Fatty acid esters	5.1259	4.9925	5.1662	5.6254	5.73	5.6983	4.5078	4.7114	4.5246	5.4935	5.5577	5.469	5.3038	5.2834	5.2796
pos_817	Galactaric acid	metab_2858	-	map01100;map00053	Metabolic pathways;Ascorbate and aldarate metabolism	C00879	LMFA01170107;HMDB0000639	pos	-	-	Metabolism;Metabolism	Global and overview maps;Carbohydrate metabolism	Organic oxygen compounds	Organooxygen compounds	252.072	M+ACN+H	C6H10O8	2.8984	0.0317918	0	36.4	3.90688	526-99-8	Carbohydrates and carbohydrate conjugates	4.5379	4.4776	4.6475	5.0468	5.1568	5.173	3.896	4.175	3.9048	4.9263	5.0109	4.9814	4.7484	4.7269	4.723
pos_818	(4As,5aS,6S,12aS)-1,6,10,11-tetrahydroxy-6-methyl-3,12-dioxo-4a,5,5a,12a-tetrahydro-4H-tetracene-2-carboxamide	metab_2859	-	-	-	-	HMDB0250378	pos	-	-	-	-	Phenylpropanoids and polyketides	Tetracyclines	430.091	M+2Na-H	C20H19NO7	2.8984	0.0296738	0	72.9	8.94564	-	Not Available	3.8075	4.1817	4.0319	5.125	5.3279	5.3427	3.8333	3.8103	3.865	5.1494	5.0764	4.8502	4.7123	4.7331	4.7098
pos_820	Folinic acid	metab_2862	-	map01100;map00670	Metabolic pathways;One carbon pool by folate	C03479	HMDB0001562;HMDB0247218	pos	-	-	Metabolism;Metabolism	Global and overview maps;Metabolism of cofactors and vitamins	Organoheterocyclic compounds	Pteridines and derivatives	474.172	M+H	C20H23N7O7	2.9383	0.00182417	0	69	-1.57659	58-05-9;68538-85-2	Pterins and derivatives	5.4851	5.4343	5.2899	5.9789	5.8369	5.8642	5.5503	5.6529	5.6566	6.2172	6.2083	6.1913	5.8254	5.8269	5.8264
pos_828	Polychrom	metab_2870	-	-	-	-	;MJDBOTE0001044	pos	-	-	-	-	-	-	305.065	M+H-2H2O	C15H16O9	2.9941	0.0166694	53.4	0	-1.86886	-	-	4.3621	3.8854	4.3182	5.0516	5.0345	4.9884	1.9183	1.8956	1.9497	4.2307	4.4811	4.0441	4.403	4.3929	4.389
pos_83	Zingiberol	metab_2872	-	-	-	-	HMDB0303118	pos	-	-	-	-	Organic oxygen compounds	Organooxygen compounds	254.247	M+H, M+NH4, M+H-H2O	C16H28O	6.6781	0.00309343	0	46	-2.03976	-	Alcohols and polyols	6.3401	6.3299	6.4866	6.7182	6.6176	6.6608	6.3451	6.3746	6.4147	6.6011	6.677	6.6847	6.4962	6.4938	6.4939
pos_84	(E)-5,8-Megastigmadien-4-one	metab_2883	-	-	-	-	HMDB0034671	pos	-	-	-	-	Organic oxygen compounds	Organooxygen compounds	210.185	M+H-H2O, M+H, M+NH4	C13H20O	6.7337	0.0381966	0	56.1	-1.59538	67401-26-7	Carbonyl compounds	5.0816	5.1003	5.256	5.4766	5.3577	5.4422	4.9793	5.031	5.0761	5.399	5.448	5.526	5.2441	5.2456	5.2733
pos_853	6-[(2S,3S,4R,5R)-5-(6-Aminopurin-9-yl)-3,4-dihydroxyoxolan-2-yl]oxane-2,5-dione	metab_2898	-	-	-	-	HMDB0257755	pos	-	-	-	-	Nucleosides, nucleotides, and analogues	Purine nucleosides	737.17	2M+K	C14H15N5O6	3.1771	0.00617603	0	49.7	2.88281	-	Not Available	7.2812	7.2648	7.0269	6.5843	6.5733	6.4902	6.4855	6.9873	6.8268	5.6307	6.0046	5.7564	6.9184	6.9137	6.9138
pos_876	Isokaempferide	metab_2922	-	-	-	C05902	LMPK12112688;HMDB0302564	pos	-	-	-	-	Phenylpropanoids and polyketides	Flavonoids	664.141	2M+ACN+Na	C16H12O6	3.3037	0.117301	65.5	0	-3.24192	-	O-methylated flavonoids	4.0055	4.0542	4.0519	5.3171	5.0262	5.0419	4.0313	4.675	4.0631	4.0811	5.1268	4.2232	4.6736	4.6876	4.7656
pos_879	(S)-2-Acetolactate	metab_2925	-	map01100;map01110;map00770;map00650;map01210;map00290;map01230;map00660	Metabolic pathways;Biosynthesis of secondary metabolites;Pantothenate and CoA biosynthesis;Butanoate metabolism;2-Oxocarboxylic acid metabolism;Valine, leucine and isoleucine biosynthesis;Biosynthesis of amino acids;C5-Branched dibasic acid metabolism	C06010	LMFA01050460;HMDB0006855	pos	-	-	Metabolism;Metabolism;Metabolism;Metabolism;Metabolism;Metabolism;Metabolism;Metabolism	Global and overview maps;Global and overview maps;Metabolism of cofactors and vitamins;Carbohydrate metabolism;Global and overview maps;Amino acid metabolism;Global and overview maps;Carbohydrate metabolism	Organic acids and derivatives	Keto acids and derivatives	303.049	2M+K	C5H8O4	3.3196	0.00388281	0	42.8	6.07185	71698-08-3	Short-chain keto acids and derivatives	4.6485	4.443	4.3554	5.4336	5.3683	5.5192	4.8414	5.0499	4.4629	5.1283	5.3855	4.7961	5.055	5.0565	5.0584
pos_882	Quercetin 7-glucoside	metab_2929	-	-	-	C12639	HMDB0302151	pos	-	-	-	-	Phenylpropanoids and polyketides	Flavonoids	487.084	M+Na	C21H20O12	3.3355	0.178445	0	79	-2.01374	-	Flavonoid glycosides	3.8551	4.2822	4.2778	5.6438	5.709	5.6216	3.8809	4.0672	3.9127	5.0657	5.6422	5.2915	4.677	4.5331	4.6748
pos_899	4-Hydroxy-benzenepropanedioate	metab_2945	-	-	-	-	HMDB0059809	pos	-	-	-	-	Benzenoids	Phenol esters	197.044	M+H	C9H8O5	3.4621	0.0449325	0	43.5	-1.65329	-	Not Available	5.0657	5.0941	5.1247	0.8484	0.8562	3.2961	5.2492	5.4653	5.1677	0.8644	0.8555	0.8532	4.9687	4.9703	4.9353
pos_902	3-deoxy-D-arabino-heptulosonate-7-phosphate	metab_2950	-	map01100;map00400;map01110;map01230	Metabolic pathways;Phenylalanine, tyrosine and tryptophan biosynthesis;Biosynthesis of secondary metabolites;Biosynthesis of amino acids	C04691	HMDB0304124	pos	-	-	Metabolism;Metabolism;Metabolism;Metabolism	Global and overview maps;Amino acid metabolism;Global and overview maps;Global and overview maps	Organic oxygen compounds	Organooxygen compounds	289.034	M+H	C7H13O10P	3.4858	0.199357	0	79.1	6.34752	-	Carbohydrates and carbohydrate conjugates	3.7163	3.765	3.7627	4.0316	4.3139	4.2924	3.7422	3.7192	3.7739	4.5377	5.0144	4.5243	3.9262	3.9374	3.7714
pos_922	6''-O-(3-Hydroxy-3-methylglutaroyl)astragalin	metab_2972	-	-	-	-	HMDB0041129	pos	-	-	-	-	Phenylpropanoids and polyketides	Flavonoids	625.175	M+CH3OH+H	C27H28O15	3.8039	0.0119452	0	71	-2.52441	157407-84-6	Flavonoid glycosides	6.0266	6.062	5.7701	5.4617	5.2573	5.4478	4.5238	5.4108	4.1644	3.7222	3.9312	3.7092	5.6414	5.6314	5.6391
pos_937	Ginkgolide C	metab_2987	-	-	-	C07603	LMPR0104540003;HMDB0036860	pos	-	-	-	-	Lipids and lipid-like molecules	Prenol lipids	485.104	M+2Na-H	C20H24O11	4.0027	0.0050692	0	93.4	2.76297	15291-76-6	Terpene lactones	5.4633	5.3914	5.2704	4.9294	4.8329	4.7843	4.4871	5.0322	4.4843	4.5024	4.492	4.4893	5.2766	5.2722	5.2743
pos_938	Diosmetin-7-O-Rutinoside	metab_2988	-	-	-	C10039	HMDB0029548;MJDBOTE0001469	pos	-	-	-	-	Phenylpropanoids and polyketides	Flavonoids	609.18	M+H	C28H32O15	4.0106	0.0154511	83.7	0	-1.84529	520-27-4	Flavonoid glycosides	6.7982	6.5768	6.7758	6.3976	6.352	6.3763	5.388	5.6832	5.8711	4.5749	5.0596	4.245	6.4036	6.3944	6.3905
pos_951	L-Hypoglycin A	metab_3002	-	-	-	C08287	HMDB0029427	pos	-	-	-	-	Organic acids and derivatives	Carboxylic acids and derivatives	124.076	M+H-H2O	C7H11NO2	4.1298	0.0194184	0	36.5	-0.00980388	156-56-9	Amino acids, peptides, and analogues	2.6033	2.6644	2.6496	4.7091	4.7085	4.675	2.629	2.6061	2.6607	4.5689	4.5345	4.5166	4.1324	4.1338	4.1185
pos_953	Maysin	metab_3004	-	-	-	-	HMDB0037419;LMPK12110512	pos	-	-	-	-	Phenylpropanoids and polyketides	Flavonoids	621.123	M+2Na-H	C27H28O14	4.1537	0.015152	0	87.7	5.95474	70255-49-1	Flavonoid glycosides	5.8561	5.7522	5.8335	5.105	5.0266	5.029	5.8874	5.7537	5.6917	4.551	5.2004	4.3852	5.6067	5.5979	5.5939
pos_954	Estriol-16-Glucuronide	metab_3005	-	-	-	C05504	HMDB0006766	pos	-	-	-	-	Lipids and lipid-like molecules	Steroids and steroid derivatives	482.238	M+NH4	C24H32O9	4.1774	0.0257402	0	51.1	-1.72307	1852-50-2	Steroidal glycosides	5.2583	5.645	5.3304	3.688	3.6971	3.7022	5.8488	5.8779	5.7703	3.7066	3.8728	4.0823	5.4106	5.4122	5.3919
pos_955	Alternariol	metab_3006	-	-	-	C16838	HMDB0030831	pos	-	-	-	-	Phenylpropanoids and polyketides	Coumarins and derivatives	259.06	M+H	C14H10O5	4.2013	0.0261117	0	61.8	-1.68818	641-38-3	Not Available	4.9881	4.8822	4.9495	4.5651	4.5013	4.3714	4.1276	4.2669	4.7572	3.518	3.5076	3.505	4.6509	4.6336	4.6297
pos_964	Cytosine deoxyribonucleoside	metab_3015	-	map00240;map01100;map02010;map01232	Pyrimidine metabolism;Metabolic pathways;ABC transporters;Nucleotide metabolism	C00881	HMDB0000014;HMDB0250725	pos	Nucleic acids	Nucleosides	Metabolism;Metabolism;Environmental Information Processing;Metabolism	Nucleotide metabolism;Global and overview maps;Membrane transport;Global and overview maps	Nucleosides, nucleotides, and analogues	Pyrimidine nucleosides	210.088	M+H-H2O	C9H13N3O4	4.3289	0.0319506	0	81.6	4.4632	951-77-9	Pyrimidine 2''-deoxyribonucleosides	4.0612	3.9952	3.9256	4.8269	4.9526	4.8099	4.2463	4.0791	4.1885	5.0694	5.0862	5.1675	4.4112	4.4369	4.4335
pos_967	2-Aminobenzoic Acid	metab_3018	-	map01100;map00996;map01110;map00999;map01230;map00400;map00380	Metabolic pathways;Biosynthesis of various alkaloids;Biosynthesis of secondary metabolites;Biosynthesis of various plant secondary metabolites;Biosynthesis of amino acids;Phenylalanine, tyrosine and tryptophan biosynthesis;Tryptophan metabolism	C00108	PW_C000877;HMDB0001123	pos	-	-	Metabolism;Metabolism;Metabolism;Metabolism;Metabolism;Metabolism;Metabolism	Global and overview maps;Biosynthesis of other secondary metabolites;Global and overview maps;Biosynthesis of other secondary metabolites;Global and overview maps;Amino acid metabolism;Amino acid metabolism	Benzenoids	Benzene and substituted derivatives	120.044	M+H-H2O	C7H7NO2	4.3609	0.0268793	71.7	0	0.665819	118-92-3	Benzoic acids and derivatives	3.7068	3.9473	3.8176	4.5755	4.5565	4.5635	3.0491	3.7989	3.8408	4.3082	4.1886	4.2175	4.0945	4.0766	4.0728
pos_975	Neocarthamin	metab_3026	-	-	-	C17675	HMDB0037476	pos	-	-	-	-	Phenylpropanoids and polyketides	Flavonoids	433.112	M+H-H2O	C21H22O11	4.4722	0.0161634	0	75.9	-1.69771	-	Flavonoid glycosides	6.391	6.0594	6.0841	5.3347	5.3566	5.2775	5.6657	5.8233	5.267	5.2818	5.2715	5.2688	5.883	5.8847	5.8717
pos_976	Chrysoeriol 7-O-(6''-malonyl-glucoside)	metab_3027	-	-	-	-	HMDB0037455	pos	-	-	-	-	Phenylpropanoids and polyketides	Flavonoids	549.123	M+H	C25H24O14	4.4802	0.0225039	0	46.9	-1.74649	-	O-methylated flavonoids	5.7692	5.6812	5.5892	4.6906	4.5649	4.9418	3.8687	3.7522	3.6082	3.6262	3.6158	3.6131	5.2517	5.2371	5.2333
pos_981	3-Phenylpropyl glucosinolate	metab_3032	-	-	-	-	HMDB0038422	pos	-	-	-	-	Organic oxygen compounds	Organooxygen compounds	438.084	M+H	C16H23NO9S2	4.6313	0.0168555	0	38.7	-9.74046	76265-25-3	Carbohydrates and carbohydrate conjugates	5.5263	5.8002	5.5842	4.7789	4.6364	4.5703	5.0072	5.1107	5.3116	4.5747	4.5643	4.5616	5.2741	5.2756	5.2622
pos_982	6''-O-Malonyldaidzin	metab_3033	-	map00943	Isoflavonoid biosynthesis	C16191	HMDB0041263	pos	-	-	Metabolism	Biosynthesis of other secondary metabolites	Phenylpropanoids and polyketides	Coumarins and derivatives	503.115	M+H	C24H22O12	4.6471	0.0181631	0	69.4	-6.80397	124590-31-4	Furanocoumarins	5.5456	5.4702	5.447	5.2255	5.2317	5.13	4.8111	4.9903	5.4372	3.7551	4.4971	4.0238	5.2971	5.3094	5.2948
pos_993	3,5-Dicaffeoyl-4-succinoylquinic acid	metab_3045	-	-	-	-	HMDB0029903	pos	-	-	-	-	Organic acids and derivatives	Carboxylic acids and derivatives	599.138	M+H-H2O	C29H28O15	4.7586	0.0120597	0	73.2	-1.78167	179761-31-0	Pentacarboxylic acids and derivatives	5.7128	6.0305	5.6574	4.8183	4.875	4.9559	6.132	5.9195	6.167	4.9582	5.1102	5.0393	5.7954	5.7934	5.7855
pos_996	Riboflavin reduced	metab_3048	-	map01100;map00740	Metabolic pathways;Riboflavin metabolism	C01007	HMDB0001557	pos	-	-	Metabolism;Metabolism	Global and overview maps;Metabolism of cofactors and vitamins	Organoheterocyclic compounds	Pteridines and derivatives	313.091	M+H-2H2O	C15H16N4O6	4.7824	0.0341907	0	47.5	-6.00441	101652-10-2	Alloxazines and isoalloxazines	4.3997	4.4251	4.4482	3.3243	3.4537	3.8823	4.9397	4.81	5.0126	4.4865	4.5581	4.361	4.5695	4.5463	4.5423
pos_470	11beta-hydroxyandrost-4-ene-3,17-dione	metab_3052	-	-	-	C05284	HMDB0006773;LMST02020066	pos	-	-	-	-	Organoheterocyclic compounds	Oxazinanes	303.195	M+H, M+Na	C19H26O3	6.2731	0.025667	35	0	-2.11972	382-44-5	Morpholines	5.1452	5.5313	5.6507	4.0482	3.6073	3.6124	5.342	4.9734	5.8156	5.1376	4.8839	5.0742	5.3281	5.3077	5.3261
pos_2387	3-O-Methylquercetin	metab_3054	-	map01110;map00944	Biosynthesis of secondary metabolites;Flavone and flavonol biosynthesis	C04443	HMDB0002655	pos	-	-	Metabolism;Metabolism	Global and overview maps;Biosynthesis of other secondary metabolites	Phenylpropanoids and polyketides	Flavonoids	317.065	M+H	C16H12O7	6.0676	0.0492473	65.9	0	-2.07875	480-19-3	Flavones	4.7988	4.694	4.7161	5.2234	5.0854	5.1514	4.4244	4.4492	4.4304	5.1174	5.1718	5.1959	4.8978	4.8633	4.8595
pos_3055	Aspartic Acid	metab_3056	-	map02010;map01240;map00270;map01200;map00999;map00250;map00410;map00770;map00470;map00710;map01100;map00220;map00300;map01210;map00340;map01230;map00260;map00261;map01110;map00760;map00460;map00970	ABC transporters;Biosynthesis of cofactors;Cysteine and methionine metabolism;Carbon metabolism;Biosynthesis of various plant secondary metabolites;Alanine, aspartate and glutamate metabolism;beta-Alanine metabolism;Pantothenate and CoA biosynthesis;D-Amino acid metabolism;Carbon fixation in photosynthetic organisms;Metabolic pathways;Arginine biosynthesis;Lysine biosynthesis;2-Oxocarboxylic acid…	C00049	HMDB0006483;HMDB0000191;MJDBOTE0000530	pos	Peptides;Hormones and transmitters	Amino acids;Neurotransmitters	Environmental Information Processing;Metabolism;Metabolism;Metabolism;Metabolism;Metabolism;Metabolism;Metabolism;Metabolism;Metabolism;Metabolism;Metabolism;Metabolism;Metabolism;Metabolism;Metabolism;Metabolism;Metabolism;Metabolism;Metabolism;Metabolism;Genetic Information Processing	Membrane transport;Global and overview maps;Amino acid metabolism;Global and overview maps;Biosynthesis of other secondary metabolites;Amino acid metabolism;Metabolism of other amino acids;Metabolism of cofactors and vitamins;Metabolism of other amino acids;Energy metabolism;Global and overview maps;Amino acid metabolism;Amino acid metabolism;Global and overview maps;Amino acid metabolism;Global …	Organic acids and derivatives	Carboxylic acids and derivatives	134.045	M+H	C4H7NO4	0.8422	0.00591742	81.7	0	-1.04431	1783-96-6;617-45-8;56-84-8	Amino acids, peptides, and analogues	5.9218	5.9159	5.9843	6.4607	6.4498	6.326	5.8413	5.8895	5.9665	6.3796	6.4107	6.3246	6.1157	6.1208	6.1181
pos_2754	Lampranthin II	metab_3067	-	map01110;map00944	Biosynthesis of secondary metabolites;Flavone and flavonol biosynthesis	C12634	HMDB0304696	pos	-	-	Metabolism;Metabolism	Global and overview maps;Biosynthesis of other secondary metabolites	Phenylpropanoids and polyketides	Flavonoids	611.159	M+H	C27H30O16	3.0177	0.0176878	0	93.3	-2.29686	32074-65-0	Flavonoid glycosides	6.1657	5.9931	5.9404	5.5271	5.4506	5.4838	5.2438	5.5602	5.1741	3.4822	4.3461	3.7162	5.6492	5.6383	5.6344
pos_2568	Penicillic Acid	metab_3071	-	-	-	C16804;C19495	HMDB0256217	pos	-	-	-	-	Organic acids and derivatives	Keto acids and derivatives	153.054	M+H-H2O	C8H10O4	4.3847	0.026924	44.7	0	-1.19729	90-65-3;17397-87-4	Medium-chain keto acids and derivatives	3.7235	3.8564	4.0747	4.5866	4.4954	4.5003	3.5671	3.7187	3.7452	4.642	4.5676	4.5628	4.1735	4.1759	4.1947
neg_1034	4-Hydroxybenzoyl glucose	metab_3116	-	-	-	-	HMDB0303022	neg	-	-	-	-	Organic oxygen compounds	Organooxygen compounds	299.077	M-H	C13H16O8	3.1137	0.0328295	0	53.2	-0.761145	-	Carbohydrates and carbohydrate conjugates	4.5263	4.5977	4.8779	4.2873	4.2766	4.2845	4.172	4.1427	3.8991	4.11	4.1508	3.4707	4.4146	4.4392	4.4398
neg_1037	2-Furancarboxaldehyde	metab_3119	-	map01100	Metabolic pathways	C14279	HMDB0032914	neg	-	-	Metabolism	Global and overview maps	Organic oxygen compounds	Organooxygen compounds	287.056	3M-H	C5H4O2	3.126	0.0199229	0	63	-0.465099	1998-01-01	Carbonyl compounds	4.4468	4.7538	4.3699	3.6057	3.625	3.6691	3.496	3.4639	3.4839	3.6046	3.5791	3.632	4.0986	4.0836	4.0838
neg_1039	Licorice glycoside C1	metab_3121	-	-	-	-	LMPK12140030;HMDB0031995	neg	-	-	-	-	Phenylpropanoids and polyketides	Flavonoids	725.215	M-H	C36H38O16	3.126	0.00676102	0	64.9	8.65497	-	Flavonoid glycosides	4.5358	4.7866	4.7064	4.0811	4.1004	4.1445	5.3652	5.3528	5.3418	4.9399	4.9597	4.5841	5.0408	5.0356	5.0359
neg_1058	Isoquercitrin	metab_3142	-	map01100;map01110;map00944	Metabolic pathways;Biosynthesis of secondary metabolites;Flavone and flavonol biosynthesis	C05623	HMDB0037362;LMPK12112086;MJDBOTE0000951	neg	-	-	Metabolism;Metabolism;Metabolism	Global and overview maps;Global and overview maps;Biosynthesis of other secondary metabolites	Phenylpropanoids and polyketides	Flavonoids	463.088	M-H	C21H20O12	3.159	0.00269124	0	63.8	0.0691052	21637-25-2;482-35-9	Flavonoid glycosides	5.6159	5.6372	5.6882	6.1042	6.087	6.1404	5.8101	5.9229	5.5978	5.9584	6.1365	5.909	5.8633	5.864	5.8656
neg_1070	2,3,4-Trihydroxybenzoic acid	metab_3155	-	-	-	-	HMDB0059964	neg	-	-	-	-	Benzenoids	Benzene and substituted derivatives	151.003	M-H2O-H	C7H6O5	3.1966	0.0122015	0	36.7	-5.07808	610-02-6	Benzoic acids and derivatives	4.3541	4.2002	4.261	4.9122	4.9935	5.056	4.1265	4.3145	3.9628	5.08	5.1158	5.0902	4.6946	4.6956	4.7042
neg_1078	Fluvoxamino acid	metab_3163	-	-	-	-	HMDB0060950	neg	-	-	-	-	Benzenoids	Benzene and substituted derivatives	355.067	M+K-2H	C14H17F3N2O3	3.2153	0.0116677	0	43.7	-2.54565	88699-91-6	Trifluoromethylbenzenes	5.721	5.5151	5.6624	6.269	6.1882	6.3778	5.5977	5.8849	5.4524	5.9952	6.1017	5.9277	5.8827	5.8847	5.8923
neg_1084	4-Methylumbelliferone glucuronide	metab_3170	-	-	-	C11584	HMDB0240464	neg	-	-	-	-	Phenylpropanoids and polyketides	Coumarins and derivatives	397.077	M+FA-H	C16H16O9	3.234	0.0256078	0	51.8	-1.74614	6160-80-1	Coumarin glycosides	4.2695	4.2287	4.3465	5.2873	5.3411	5.2985	4.2197	3.9634	4.2386	5.4706	5.7941	5.3551	4.9916	4.9803	5.0026
neg_1094	CMP-N-glycoloylneuraminate	metab_3181	-	map00520;map01250	Amino sugar and nucleotide sugar metabolism;Biosynthesis of nucleotide sugars	C03691	HMDB0012206	neg	-	-	Metabolism;Metabolism	Carbohydrate metabolism;Global and overview maps	Organic oxygen compounds	Organooxygen compounds	611.126	M-H2O-H	C20H31N4O17P	3.2622	0.0530017	0	74.5	2.55066	98300-80-2	Carbohydrates and carbohydrate conjugates	5.0252	4.6213	3.9691	3.2445	3.2638	3.3078	3.1348	3.1027	3.1093	3.2434	3.2179	3.2708	4.0908	4.1307	4.092
neg_1096	Chlorogenic acid	metab_3183	-	map00940;map00941;map01110;map00945	Phenylpropanoid biosynthesis;Flavonoid biosynthesis;Biosynthesis of secondary metabolites;Stilbenoid, diarylheptanoid and gingerol biosynthesis	C00852	HMDB0040690;HMDB0003164	neg	-	-	Metabolism;Metabolism;Metabolism;Metabolism	Biosynthesis of other secondary metabolites;Biosynthesis of other secondary metabolites;Global and overview maps;Biosynthesis of other secondary metabolites	Organic oxygen compounds	Organooxygen compounds	353.088	M-H	C16H18O9	3.2702	0.0202637	0	75.5	-0.642249	202650-88-2;327-97-9;202650-88-2	Alcohols and polyols	4.0693	4.2535	4.1977	5.1882	5.3751	5.042	3.5713	3.8925	4.1474	4.9557	5.5797	5.1677	4.7206	4.7369	4.7231
neg_1136	1-[[(2S,3S,4S,5R)-3,4-Dihydroxy-5-(hydroxymethyl)-2-[(2R,3R,4S,5S,6R)-3,4,5-trihydroxy-6-(hydroxymethyl)oxan-2-yl]oxyoxolan-2-yl]methoxy]propan-2-one	metab_3227	-	-	-	-	HMDB0260242	neg	-	-	-	-	Organic oxygen compounds	Organooxygen compounds	435.093	M+K-2H	C15H26O12	3.3607	0.0272667	0	53.8	5.54096	-	Carbohydrates and carbohydrate conjugates	5.3221	5.137	5.2136	3.8759	4.1886	4.3357	5.4268	5.5346	5.2478	3.7854	3.6255	3.2332	5.1241	5.142	5.1199
neg_1138	7-Hydroxy-3-methoxy-1-primeverosyloxyxanthone	metab_3229	-	-	-	-	HMDB0033770	neg	-	-	-	-	Organoheterocyclic compounds	Benzopyrans	597.147	M+FA-H	C25H28O14	3.3666	0.0255889	0	85.5	0.777122	85754-76-3	1-benzopyrans	5.0735	5.2084	5.2391	4.5568	4.2904	4.2148	4.5682	4.7525	4.9195	3.8054	3.7799	3.8329	4.8683	4.8702	4.8499
neg_1144	Parishin C	metab_3236	-	-	-	C17466	HMDB0256129	neg	-	-	-	-	Organic oxygen compounds	Organooxygen compounds	765.168	M+K-2H	C32H40O19	3.3905	0.0216087	0	45.1	3.62146	-	Carbohydrates and carbohydrate conjugates	3.4695	3.5231	3.8145	6.1442	6.242	6.1541	3.7458	3.8072	3.1269	3.9853	4.7013	4.1599	4.9763	4.9784	4.9611
neg_1170	Occidentoside	metab_3265	-	-	-	-	HMDB0030574	neg	-	-	-	-	Lignans, neolignans and related compounds	Lignan glycosides	749.171	M+FA-H	C36H32O15	3.484	0.00842303	0	39.7	-1.41389	77782-91-3	Not Available	5.9909	6.0335	5.7745	5.3123	5.3558	5.3264	5.3955	5.6521	5.6205	3.9688	4.4708	3.9104	5.715	5.7153	5.7088
neg_1176	3-Hydroxybenzoic Acid	metab_3271	-	map00400	Phenylalanine, tyrosine and tryptophan biosynthesis	C00587	HMDB0002466	neg	-	-	Metabolism	Amino acid metabolism	Benzenoids	Benzene and substituted derivatives	137.023	M-H	C7H6O3	3.5108	0.0220667	59.1	0	-6.84704	1999-06-09	Benzoic acids and derivatives	5.1839	5.1585	5.1741	5.9408	5.9326	5.9611	5.3928	5.4427	5.3499	6.02	5.9874	6.1146	5.5478	5.5509	5.5657
neg_1201	Esculetin	metab_3300	-	map01110;map00999	Biosynthesis of secondary metabolites;Biosynthesis of various plant secondary metabolites	C09263	HMDB0030819;MJDBOTE0000366	neg	-	-	Metabolism;Metabolism	Global and overview maps;Biosynthesis of other secondary metabolites	Phenylpropanoids and polyketides	Coumarins and derivatives	177.019	M-H	C9H6O4	3.6217	0.0616699	47	0	-4.57561	305-01-1	Hydroxycoumarins	2.7966	3.642	3.4651	4.4061	4.4745	4.4568	4.089	3.8635	3.991	4.7641	4.8692	4.895	4.216	4.2043	4.2548
neg_1218	Delphinidin	metab_3318	-	map00942;map00941;map01110	Anthocyanin biosynthesis;Flavonoid biosynthesis;Biosynthesis of secondary metabolites	C05908	HMDB0003074;LMPK12010001	neg	-	-	Metabolism;Metabolism;Metabolism	Biosynthesis of other secondary metabolites;Biosynthesis of other secondary metabolites;Global and overview maps	Phenylpropanoids and polyketides	Flavonoids	284.032	M-H2O-H	C15H11O7+	3.7101	0.00473588	0	39.1	-1.63986	13270-61-6;528-53-0	Hydroxyflavonoids	6.8982	6.7583	6.8141	6.4465	6.4854	6.4756	6.5988	6.7551	6.3393	5.8224	6.0461	5.903	6.6865	6.6885	6.6906
neg_1229	Genistein 4'-O-glucuronide	metab_3330	-	-	-	-	HMDB0041737	neg	-	-	-	-	Phenylpropanoids and polyketides	Isoflavonoids	467.062	M+Na-2H	C21H18O11	3.7665	0.0122769	0	45.7	5.03652	-	Isoflavonoid O-glycosides	3.2966	3.3023	3.3293	5.8952	5.9713	5.949	3.2766	3.2445	3.2511	5.7902	5.9824	5.8539	5.2915	5.282	5.2825
neg_1244	L-alpha-amino-epsilon-keto-pimelate	metab_3347	-	-	-	-	HMDB0304407	neg	-	-	-	-	Organic acids and derivatives	Carboxylic acids and derivatives	225.004	M+K-2H	C7H10NO5-	3.8441	0.079955	0	30.2	-4.909	-	Amino acids, peptides, and analogues	4.4541	4.4598	4.4868	5.0527	5.2598	5.1469	4.4341	4.402	4.4086	4.8947	5.3603	4.8774	4.5011	4.5628	4.5628
neg_1269	Pipecolic acid betaine	metab_3374	-	-	-	C08283	HMDB0304552;HMDB0033433;HMDB0304559	neg	-	-	-	-	Organic acids and derivatives	Carboxylic acids and derivatives	909.211	2M+FA-H	C21H20O10	3.9397	0.0578771	0	75.8	1.31088	472-22-0	Amino acids, peptides, and analogues	6.1425	5.6993	5.7861	3.6442	4.0904	3.7885	4.2157	4.9491	3.7665	3.1771	3.1516	3.2045	5.0569	5.0134	5.0585
neg_1270	Gentisate aldehyde	metab_3376	-	map01100;map00350	Metabolic pathways;Tyrosine metabolism	C05585	HMDB0004062	neg	-	-	Metabolism;Metabolism	Global and overview maps;Amino acid metabolism	Organic oxygen compounds	Organooxygen compounds	275.056	2M-H	C7H6O3	3.9476	0.00728082	0	35.5	-0.315057	1194-98-5	Carbonyl compounds	4.5317	5.0961	4.1014	5.7874	5.8605	5.8294	3.74	4.3052	4.0874	5.7478	5.8576	5.8328	5.397	5.399	5.4031
neg_1287	((2-Amino-3-((2-amino-3-((carboxymethyl)amino)-3-oxopropyl)dithio)propanoyl)amino)acetic acid	metab_3393	-	-	-	-	HMDB0242125	neg	-	-	-	-	Organic acids and derivatives	Carboxylic acids and derivatives	767.147	2M+Hac-H	C10H18N4O6S2	4.0188	0.0202738	0	47.6	-0.511147	-	Amino acids, peptides, and analogues	7.0654	6.9989	7.0207	6.5801	6.6744	6.5915	7.0748	6.9355	6.9005	6.3676	6.5903	6.4448	6.9028	6.8876	6.8877
neg_1293	Emodin	metab_3400	-	-	-	C10343	LMPK13040008;HMDB0035214;MJDBOTE0001470	neg	-	-	-	-	Benzenoids	Anthracenes	315.051	M+FA-H	C15H10O5	4.0423	0.0256637	0	66.7	-0.217965	518-82-1	Anthraquinones	5.5939	5.3239	5.4149	4.8188	4.909	4.9303	4.8317	5.044	4.6523	3.5146	3.3188	3.1559	5.1487	5.169	5.1511
neg_1313	Malvidin 3-rhamnoside 5-glucoside	metab_3423	-	-	-	-	HMDB0303640	neg	-	-	-	-	Phenylpropanoids and polyketides	Flavonoids	674.158	M+Cl	C29H35O16+	4.1268	0.0381845	0	86.7	-6.42973	-	Flavonoid glycosides	5.2692	4.9966	5.3903	4.7369	4.6597	4.8261	4.132	4.2682	4.3673	4.2407	4.2151	4.2681	4.8061	4.7785	4.8089
neg_1329	Kaempferol-3-O-Arabinoside	metab_3439	-	-	-	-	-	neg	-	-	-	-	-	-	417.083	M-H	C20H18O10	4.1991	0.0124026	88.2	0	-0.174914	-	-	5.7443	5.3969	5.5319	4.662	4.6428	4.7036	5.2129	5.4572	4.7497	3.2961	3.7839	3.3235	5.3143	5.3164	5.3244
neg_1350	8-Methylsulfinyloctyl glucosinolate	metab_3463	-	-	-	C17271	HMDB0301915	neg	-	-	-	-	Organic oxygen compounds	Organooxygen compounds	514.084	M+Na-2H	C16H31NO10S3	4.2965	0.0136919	0	37.4	-4.05386	-	Carbohydrates and carbohydrate conjugates	5.547	5.3358	5.3865	4.8432	4.8766	4.8688	5.5114	5.6411	5.6246	4.8563	5.1568	4.8642	5.321	5.3231	5.3118
neg_1356	Astilbin	metab_3469	-	-	-	C17449	HMDB0033850;HMDB0242667;MJDBOTE0000979	neg	-	-	-	-	Phenylpropanoids and polyketides	Flavonoids	495.114	M+FA-H	C21H22O11	4.3398	0.00185634	0	70.2	-0.024247	29838-67-3	Flavonoid glycosides	6.7182	6.6433	6.6206	6.0156	6.2383	6.2676	6.6574	6.7748	6.2155	5.705	5.4724	5.5994	6.4835	6.482	6.4823
neg_1379	Anacetrapib	metab_3494	-	-	-	-	HMDB0248376	neg	-	-	-	-	Benzenoids	Benzene and substituted derivatives	672.143	M+Cl	C30H25F10NO3	4.4263	0.0248221	0	78.3	8.89965	-	Biphenyls and derivatives	4.9277	4.8225	4.5311	3.5389	3.5582	4.2414	5.6465	5.5799	5.6697	5.5235	5.5169	5.4819	5.3098	5.2912	5.2913
neg_1380	Paeonoside	metab_3496	-	-	-	C10717	HMDB0037433	neg	-	-	-	-	Phenylpropanoids and polyketides	Flavonoids	609.146	M-H	C27H30O16	4.4333	0.0131781	0	58.2	0.441758	20309-70-0;25615-14-9	Flavonoid glycosides	5.3265	5.3384	5.1032	4.806	4.7238	4.818	5.964	5.8928	5.9849	5.9015	5.8999	5.9089	5.7033	5.6933	5.6936
neg_1389	Isochorismate	metab_3505	-	map01100;map00130;map01110;map01240	Metabolic pathways;Ubiquinone and other terpenoid-quinone biosynthesis;Biosynthesis of secondary metabolites;Biosynthesis of cofactors	C00885	HMDB0304395	neg	-	-	Metabolism;Metabolism;Metabolism;Metabolism	Global and overview maps;Metabolism of cofactors and vitamins;Global and overview maps;Global and overview maps	Organic acids and derivatives	Hydroxy acids and derivatives	451.088	2M-H	C10H10O6	4.4838	0.0215604	0	76.3	-0.282649	22642-82-6	Beta hydroxy acids and derivatives	4.4403	4.748	4.2236	3.8848	3.2301	3.3211	5.2592	5.3479	5.3904	4.8157	5.0078	4.6287	4.9159	4.9321	4.9324
neg_1395	Quinalizarin	metab_3511	-	-	-	-	HMDB0257032	neg	-	-	-	-	Benzenoids	Anthracenes	603.078	2M+Hac-H	C14H8O6	4.5287	0.0173938	0	65	0.793933	-	Anthraquinones	4.2853	4.5192	3.9331	6.1276	6.2016	6.1738	4.3312	4.6706	3.8904	5.9429	6.0659	6.0216	5.6149	5.617	5.6029
neg_1399	(6R)-5,10-Methylenetetrahydrofolate	metab_3515	-	map01100;map01200;map00670;map00260;map01240	Metabolic pathways;Carbon metabolism;One carbon pool by folate;Glycine, serine and threonine metabolism;Biosynthesis of cofactors	C00143	HMDB0001533;HMDB0243630	neg	-	-	Metabolism;Metabolism;Metabolism;Metabolism;Metabolism	Global and overview maps;Global and overview maps;Metabolism of cofactors and vitamins;Amino acid metabolism;Global and overview maps	Organoheterocyclic compounds	Pteridines and derivatives	492.136	M+Cl	C20H23N7O6	4.5405	0.0147563	0	42.2	-9.71178	3432-99-3;31690-11-6	Pterins and derivatives	5.6262	5.3672	5.6768	5.0476	4.9842	5.1566	4.5391	4.618	4.7626	3.8769	4.057	3.6649	5.1639	5.1759	5.1662
neg_1403	N-Acetyl-D-phenylalanine	metab_3521	-	map01100;map00470	Metabolic pathways;D-Amino acid metabolism	C05620	-	neg	-	-	Metabolism;Metabolism	Global and overview maps;Metabolism of other amino acids	-	-	206.082	M-H	C11H13NO3	4.5617	0.0324795	50	0	-2.89513	10172-89-1	-	4.3285	4.4733	4.4243	4.7982	4.8555	5.0593	4.0465	4.1143	4.1086	4.8006	4.7716	4.8684	4.5463	4.571	4.5709
neg_1412	Isovitexin 2''-O-glucoside	metab_3531	-	map00944	Flavone and flavonol biosynthesis	C04199	HMDB0302583;HMDB0029484;LMPK12110217	neg	-	-	Metabolism	Biosynthesis of other secondary metabolites	Phenylpropanoids and polyketides	Flavonoids	593.151	M-H	C27H30O15	4.5852	0.00550153	0	81.9	0.264637	60767-80-8	Flavonoid glycosides	5.6171	5.706	5.6802	5.4548	4.7768	5.1186	5.7468	5.6687	5.6918	5.2706	5.3637	5.4016	5.5876	5.5848	5.5828
neg_1415	Naphthalene-1,2,4-trione	metab_3534	-	-	-	-	HMDB0257698	neg	-	-	-	-	Benzenoids	Naphthalenes	219.029	M+FA-H	C10H6O3	4.599	0.0124433	0	39.1	-3.13644	-	Naphthoquinones	4.5851	4.664	4.5845	3.8708	4.0661	4.0306	5.2355	5.1916	4.7813	4.4722	4.3917	4.4533	4.7133	4.7157	4.7236
neg_1423	6-Heptenyl glucosinolate	metab_3543	-	-	-	-	HMDB0038425	neg	-	-	-	-	Organic oxygen compounds	Organooxygen compounds	436.071	M+Na-2H	C14H25NO9S2	4.6325	0.0149252	0	43.6	-2.81116	-	Carbohydrates and carbohydrate conjugates	5.4952	5.7606	5.5846	4.9546	4.8554	4.7846	5.0735	5.1841	5.2962	3.54	4.0188	3.8726	5.3272	5.3291	5.3392
neg_1432	Isorhamnetin-3-O-Neohespeidoside	metab_3553	-	-	-	-	-	neg	-	-	-	-	-	-	669.168	M+FA-H	C28H32O16	4.6758	0.0236397	63.1	0	1.47684	-	-	4.656	4.7705	4.5042	3.6591	4.1246	3.9389	5.3736	5.1508	5.1192	5.1631	5.2882	5.2572	5.0407	5.0228	5.0233
neg_1436	Metsulfuron-methyl	metab_3557	-	-	-	C10946	HMDB0254690	neg	-	-	-	-	Benzenoids	Benzene and substituted derivatives	761.136	2M-H	C14H15N5O6S	4.6988	0.0415774	0	58.6	-6.34159	74223-64-6	Benzoic acids and derivatives	5.3416	5.4172	5.1384	4.0674	3.9664	4.4412	5.5278	5.6258	5.3904	3.9553	3.9033	4.0092	5.2607	5.2645	5.2311
neg_1473	Paclobutrazol	metab_3598	-	-	-	C18479	HMDB0256072;MJDBZSJ0000118	neg	-	-	-	-	Benzenoids	Benzene and substituted derivatives	274.112	M-H2O-H	C15H20ClN3O	4.8668	0.0192649	0	32.1	0.542828	76738-62-0	Phenethylamines	3.8621	3.8678	3.8948	4.4834	4.9784	4.5636	3.8421	3.8099	3.8166	4.161	4.4113	4.3276	3.9091	3.9236	3.9237
neg_1480	Imipenem	metab_3606	-	-	-	C06665	HMDB0015536	neg	Antibiotics	beta-Lactams	-	-	Organoheterocyclic compounds	Lactams	643.188	2M+FA-H	C12H17N3O4S	4.8938	0.03101	0	45.4	3.88173	74431-23-5;64221-86-9	Beta lactams	5.2718	5.3773	5.327	3.9802	3.664	4.2989	5.0504	5.2328	5.161	3.9467	3.5497	3.7167	5.0776	5.0817	5.0564
neg_1498	3-(3,4-Dihydroxyphenyl)prop-2-enoic Acid	metab_3625	-	-	-	-	;MJDBOTE0000794	neg	-	-	-	-	-	-	179.034	M-H	C9H8O4	5.0088	0.0181555	34.6	0	-4.23435	-	-	4.779	4.7833	4.8468	5.2593	5.1407	5.2387	4.8283	4.8372	4.9031	5.4263	5.4049	5.4655	5.0199	5.022	5.0344
neg_1500	Trifolirhizin	metab_3629	-	map00943	Isoflavonoid biosynthesis	C10538	HMDB0303946;LMPK12070033;HMDB0036630;MJDBOTE0000264	neg	-	-	Metabolism	Biosynthesis of other secondary metabolites	Phenylpropanoids and polyketides	Isoflavonoids	491.12	M+FA-H	C22H22O10	5.0088	0.0100188	0	58.5	0.0114717	6807-83-6	Furanoisoflavonoids	5.304	5.2574	5.3717	4.8865	4.9116	4.9377	5.81	5.7567	5.6151	5.559	5.4999	5.9025	5.5026	5.495	5.4951
neg_1534	Nafenopin	metab_3666	-	-	-	C11371	HMDB0255421	neg	-	-	-	-	Benzenoids	Benzene and substituted derivatives	331.133	M+Na-2H	C20H22O3	5.1573	0.00742261	0	42.1	5.02144	3771-19-5	Phenoxyacetic acid derivatives	4.6747	4.6804	4.7074	5.0697	5.4556	5.4635	4.6547	4.6225	4.6292	5.1333	5.2294	5.0133	4.7217	4.7237	4.728
neg_1536	Bruceine D	metab_3668	-	-	-	C08752	HMDB0249404	neg	-	-	-	-	Lipids and lipid-like molecules	Prenol lipids	431.135	M+Na-2H	C20H26O9	5.1642	0.0285758	0	51.9	5.30413	21499-66-1	Terpene lactones	4.7232	4.7266	5.0323	3.9604	3.8953	3.581	4.4072	4.4447	4.7565	3.2267	3.4102	3.2542	4.633	4.6116	4.6118
neg_1546	Triazophos	metab_3679	-	-	-	C18657	HMDB0259159	neg	-	-	-	-	Organoheterocyclic compounds	Azoles	348.036	M+Cl	C12H16N3O3PS	5.2027	0.0280517	0	40.7	4.48576	24017-47-8	Triazoles	5.1655	4.9605	5.1773	5.6893	5.5944	5.7746	4.3943	4.9453	4.3676	5.4931	5.392	5.4548	5.2493	5.2706	5.2707
neg_1547	Sipoglitazar	metab_3680	-	-	-	-	HMDB0258310	neg	-	-	-	-	Benzenoids	Phenol ethers	498.126	M+Cl	C25H25N3O4S	5.2027	0.0122909	0	44.6	-0.887128	-	Not Available	5.6883	5.5365	5.5514	5.1592	5.0671	5.2358	4.5888	4.9878	4.5572	3.6946	3.8502	3.7221	5.2185	5.2206	5.2286
neg_1548	Fisetin	metab_3681	-	-	-	C10041	LMPK12111566;MJDBOTE0001471	neg	-	-	-	-	-	-	285.04	M-H	C15H10O6	5.217	0.0222001	40.1	0	-0.613532	528-48-3	-	5.392	5.1823	5.3998	5.6802	5.6613	5.7679	4.898	5.1243	4.9701	5.4613	5.3916	5.4485	5.3597	5.3764	5.3767
neg_1549	D-Chicoric acid	metab_3682	-	-	-	C10437	HMDB0033938	neg	-	-	-	-	Organic acids and derivatives	Carboxylic acids and derivatives	455.062	M-H2O-H	C22H18O12	5.217	0.00825261	0	44.5	-0.0757195	52248-48-3	Tetracarboxylic acids and derivatives	5.1214	5.2128	4.8587	5.768	5.9774	5.7885	5.3955	5.317	5.1795	5.6627	6.0266	5.8227	5.5269	5.529	5.5339
neg_1567	PYR-41	metab_3702	-	-	-	-	HMDB0256938	neg	-	-	-	-	Benzenoids	Benzene and substituted derivatives	406.041	M+Cl	C17H13N3O7	5.3206	0.0186774	0	38	-8.90639	-	Benzoic acids and derivatives	4.9712	5.097	4.7309	4.3078	4.3063	4.4633	4.7416	4.6669	4.6353	4.2839	4.2497	4.3709	4.7032	4.7172	4.7174
neg_1584	Purpurin	metab_3721	-	-	-	C10395	HMDB0256928;LMPK12140007;MJDBOTE0001715	neg	-	-	-	-	Benzenoids	Anthracenes	255.03	M-H	C14H8O5	5.4088	0.0298099	41.8	0	-1.05492	81-54-9	Anthraquinones	2.6652	2.6709	2.6979	5.6472	5.4997	5.4075	2.6453	2.6132	2.6199	4.6287	5.4513	4.685	4.0335	4.0563	4.056
neg_1588	Neohesperidose	metab_3725	-	-	-	C08244	HMDB0029523;HMDB0302540	neg	-	-	-	-	Organic oxygen compounds	Organooxygen compounds	363.072	M+K-2H	C12H22O10	5.4275	0.0103448	0	74.8	6.6703	17074-02-1	Carbohydrates and carbohydrate conjugates	4.9329	4.9807	4.9242	3.3977	3.4169	3.461	5.3332	5.3777	5.1215	4.0512	3.371	3.9675	4.9189	4.922	4.9277
neg_1592	Lomerizine	metab_3730	-	-	-	-	HMDB0254154	neg	-	-	-	-	Benzenoids	Benzene and substituted derivatives	505.172	M+K-2H	C27H30F2N2O3	5.4443	0.0115989	0	32	1.27389	-	Diphenylmethanes	4.8184	5.0431	5.0868	4.4632	4.5145	4.554	5.5422	5.2753	5.5185	5.2497	5.2647	5.2864	5.1914	5.194	5.1843
neg_16	2-Pyrocatechuic Acid	metab_3738	-	map01110	Biosynthesis of secondary metabolites	C00196	HMDB0000397;MJDBOTE0000462	neg	-	-	Metabolism	Global and overview maps	Benzenoids	Benzene and substituted derivatives	153.018	M-H, M+Cl, 2M-H	C7H6O4	3.1398	0.0101972	90	0	-5.89124	303-38-8	Benzoic acids and derivatives	6.8304	6.8227	6.8448	7.5438	7.6423	7.6825	6.705	6.8517	6.5787	7.7032	7.8033	7.7436	7.2981	7.3057	7.3058
neg_1611	Cubebin	metab_3752	-	-	-	C10549	HMDB0030682	neg	-	-	-	-	Lignans, neolignans and related compounds	Furanoid lignans	401.124	M+FA-H	C20H20O6	5.5432	0.0546438	0	66.3	-0.569719	18423-69-3	Tetrahydrofuran lignans	4.7338	4.6942	5.1763	4.0097	4.029	4.073	3.9574	3.8678	4.5431	4.0086	3.9831	4.036	4.4717	4.431	4.4739
neg_1618	(-)-Wikstromol	metab_3759	-	-	-	C10725	HMDB0030598	neg	-	-	-	-	Lignans, neolignans and related compounds	Furanoid lignans	373.129	M-H	C20H22O7	5.5717	0.0136238	0	56.9	-0.585666	34444-37-6	Tetrahydrofuran lignans	4.833	4.8828	4.9157	4.0192	3.7905	3.992	4.75	4.9296	4.6717	3.9115	3.7244	3.1512	4.6838	4.6938	4.6834
neg_1629	Cortolone-3-glucuronide	metab_3771	-	-	-	-	HMDB0010320	neg	-	-	-	-	Lipids and lipid-like molecules	Steroids and steroid derivatives	541.265	M-H	C27H42O11	5.6514	0.0441209	0	67.2	0.0389327	56162-46-0	Steroidal glycosides	5.161	5.3227	5.2656	4.8126	4.8235	4.9369	5.5708	5.3763	5.4616	5.3483	5.3846	5.3688	5.3166	5.3189	5.2842
neg_1657	Swertiajaponin	metab_3802	-	-	-	C10187	LMPK12111030;HMDB0030569	neg	-	-	-	-	Phenylpropanoids and polyketides	Flavonoids	483.093	M+Na-2H	C22H22O11	5.7848	0.0101356	0	74.4	5.00679	6980-25-2	Flavonoid glycosides	4.882	4.8901	4.5884	5.3697	5.5798	5.4279	5.0571	4.8225	4.8404	5.2234	5.4944	5.4504	5.0825	5.091	5.0847
neg_1662	Wedelolactone	metab_3808	-	-	-	C10541	HMDB0259891;LMPK12090046	neg	-	-	-	-	Phenylpropanoids and polyketides	Isoflavonoids	313.035	M-H	C16H10O7	5.8197	0.0108203	67.9	0	-0.239811	524-12-9	Coumestans	4.2708	4.3397	4.0634	6.7245	6.4513	6.4477	4.4878	4.3698	4.2301	5.5339	6.2033	5.6954	5.2647	5.2741	5.269
neg_1698	(2S,3S,4S,5R)-6-[4-(5,7-Dihydroxy-4-oxochromen-3-yl)phenoxy]-3,4,5-trihydroxyoxane-2-carboxylic acid	metab_3847	-	-	-	-	HMDB0257972	neg	-	-	-	-	Phenylpropanoids and polyketides	Isoflavonoids	467.062	M+Na-2H	C21H18O11	5.9494	0.00421929	0	62.2	5.1448	-	Isoflavonoid O-glycosides	6.2329	6.3983	6.0672	5.4794	5.632	5.5214	6.371	6.4686	6.2944	5.7272	5.7329	5.6832	6.1561	6.1548	6.1584
neg_1703	Phenol A	metab_3854	-	-	-	-	HMDB0256407	neg	-	-	-	-	Benzenoids	Benzene and substituted derivatives	241.108	M+FA-H	C11H16O3	5.9641	0.0152923	0	32.8	-1.58682	-	Phenylpropanes	5.36	5.1007	5.6005	4.3339	4.3854	4.7726	4.4255	4.8371	4.357	4.6217	4.409	4.2805	5.033	5.0349	5.0453
neg_1762	Isorhamnetin 3-(6''-malonylglucoside)	metab_3918	-	-	-	-	HMDB0038820;LMPK12110589	neg	-	-	-	-	Phenylpropanoids and polyketides	Flavonoids	601.063	M+K-2H	C25H24O15	6.0566	0.0067728	0	42.5	4.5915	86555-37-5	Flavonoid glycosides	6.8617	7.0954	6.688	6.2839	6.2403	6.0893	6.8112	6.9658	6.7834	6.1611	6.0618	5.8802	6.7068	6.7016	6.7017
neg_177	Orsellinic acid 2-O-beta-D-glucoside	metab_3926	-	-	-	-	HMDB0302998	neg	-	-	-	-	Organic oxygen compounds	Organooxygen compounds	329.087	M-H, M+Cl	C14H18O9	2.8082	0.0183624	0	56.5	-0.984756	-	Carbohydrates and carbohydrate conjugates	6.2643	6.3052	6.486	7.2202	7.3053	7.3179	6.2122	6.1579	6.1859	7.0429	7.1946	7.0766	6.7939	6.8031	6.8099
neg_1809	Theaflavic acid	metab_3970	-	-	-	-	HMDB0040609	neg	-	-	-	-	Phenylpropanoids and polyketides	Flavonoids	409.056	M-H2O-H	C21H16O10	6.1278	0.00412698	0	35.1	-0.421036	30407-93-3	Flavans	4.1516	4.6112	3.388	5.3198	5.35	5.4601	5.075	5.2129	4.7568	5.6887	5.7605	5.7122	5.2779	5.2746	5.2749
neg_1818	Azelaic Acid	metab_3980	-	-	-	C08261	LMFA01170054;HMDB0000784;MJDBOTE0000344	neg	-	-	-	-	Lipids and lipid-like molecules	Fatty Acyls	169.086	M-H2O-H	C9H16O4	6.1513	0.0229594	51.6	0	-4.30974	123-99-9	Fatty acids and conjugates	4.8967	4.778	5.067	4.0291	3.9401	4.1398	4.274	4.6123	4.3621	4.1701	4.1536	4.1232	4.6392	4.6231	4.6415
neg_1855	5-(3',4',5'-Trihydroxyphenyl)-gamma-valerolactone-O-methyl-O-sulphate	metab_4021	-	-	-	-	HMDB0060029	neg	-	-	-	-	Benzenoids	Phenols	355.009	M+Na-2H	C12H14O9S	6.2301	0.00931009	0	35.2	-3.20322	-	Benzenediols	4.4819	4.5135	4.5108	5.0445	5.1302	5.19	4.6796	4.47	4.4065	5.4949	5.7153	5.5947	5.0342	5.0287	5.0366
neg_1864	1,11-Undecanedicarboxylic acid	metab_4030	-	-	-	-	HMDB0002327	neg	-	-	-	-	Lipids and lipid-like molecules	Fatty Acyls	243.16	M-H	C13H24O4	6.2536	0.0257362	71.3	0	-1.35893	505-52-2	Fatty acids and conjugates	4.3302	4.4297	4.3768	4.6892	4.7559	4.7092	4.4509	4.4044	4.4736	4.7224	4.6745	4.7884	4.4957	4.4975	4.4772
neg_1880	9-Oxo-11-(3-pentyloxiran-2-YL)undec-10-enoic acid	metab_4048	-	-	-	-	HMDB0246689	neg	-	-	-	-	Lipids and lipid-like molecules	Fatty Acyls	345.183	M+Cl	C18H30O4	6.3007	0.0383703	0	42	-2.00077	-	Fatty acids and conjugates	5.0685	4.6412	5.222	4.3511	4.488	4.4859	3.4816	2.6211	3.9292	3.1209	3.1515	3.4877	4.5761	4.6058	4.5784
neg_1883	Isokobusone	metab_4051	-	-	-	C16977	HMDB0036791	neg	-	-	-	-	Organic oxygen compounds	Organooxygen compounds	221.154	M-H	C14H22O2	6.3085	0.00652892	0	41.4	-2.29909	24173-72-6	Alcohols and polyols	4.1603	4.2239	4.2742	4.6656	4.6116	4.6041	4.4113	4.1886	4.2143	4.5423	4.4226	4.548	4.3603	4.3553	4.3556
neg_1910	Glucoberteroin	metab_4082	-	map01210;map01110;map00966	2-Oxocarboxylic acid metabolism;Biosynthesis of secondary metabolites;Glucosinolate biosynthesis	C08401	HMDB0304679	neg	-	-	Metabolism;Metabolism;Metabolism	Global and overview maps;Global and overview maps;Biosynthesis of other secondary metabolites	Organic oxygen compounds	Organooxygen compounds	433.056	M-H	C13H24NO9S3-	6.3561	0.0319314	0	78.3	4.74046	29611-01-6	Carbohydrates and carbohydrate conjugates	5.0827	5.0118	4.8224	5.5142	5.8206	5.8215	5.2062	5.1545	5.1073	5.5207	5.6673	5.7222	5.274	5.299	5.2765
neg_1916	Normethandrone	metab_4088	-	-	-	C14491	HMDB0255746	neg	-	-	-	-	Lipids and lipid-like molecules	Steroids and steroid derivatives	333.207	M+FA-H	C19H28O2	6.3718	0.01304	0	75.6	-1.03832	514-61-4	Estrane steroids	5.4572	5.5442	5.4164	4.9899	5.0308	5.077	5.276	5.0601	5.4577	5.3806	5.255	5.4126	5.341	5.3311	5.3314
neg_1931	12-OPDA	metab_4103	-	map01100;map00592;map01110	Metabolic pathways;alpha-Linolenic acid metabolism;Biosynthesis of secondary metabolites	C01226	HMDB0301804	neg	-	-	Metabolism;Metabolism;Metabolism	Global and overview maps;Lipid metabolism;Global and overview maps	Lipids and lipid-like molecules	Fatty Acyls	291.196	M-H	C18H28O3	6.4188	0.0100175	59.4	0	-0.577724	85551-10-6	Eicosanoids	5.3326	5.1663	5.3997	4.802	4.7588	4.9631	4.9516	5.019	4.9815	4.5827	4.3036	4.542	5.0828	5.0751	5.0754
neg_1951	3,17,20-Trihydroxypregnane	metab_4125	-	-	-	-	HMDB0256756	neg	-	-	-	-	Lipids and lipid-like molecules	Steroids and steroid derivatives	381.264	M+FA-H	C21H36O3	6.4737	0.0124893	0	45.8	-0.724198	-	Pregnane steroids	5.2051	5.2203	5.2533	4.8728	4.4066	4.1752	4.1948	4.3522	4.4421	3.6685	3.401	3.9808	4.8664	4.8684	4.8581
neg_1955	DG(a-15:0/0:0/PGJ2)	metab_4129	-	-	-	-	HMDB0297545	neg	-	-	-	-	Not Available	Not Available	613.445	M-H2O-H	C38H64O7	6.4815	0.0313993	0	55.7	-3.60212	-	Not Available	5.4163	5.1567	5.4129	5.0128	4.7789	4.971	4.9372	4.7678	4.8623	4.8881	3.785	4.4185	5.1229	5.1248	5.1
neg_1985	2-(3-Pentylphenyl)acetic acid	metab_4160	-	-	-	-	HMDB0244924	neg	-	-	-	-	Benzenoids	Benzene and substituted derivatives	471.275	2M+Hac-H	C13H18O2	6.5598	0.0245988	0	42.7	-0.365918	-	Not Available	5.3582	5.1948	5.4497	4.8936	4.9424	4.8132	4.8853	4.7802	5.0988	4.6798	4.4297	4.8216	5.1552	5.1573	5.1377
neg_201	Naringenin-7-O-glucoside	metab_4189	-	-	-	-	-	neg	-	-	-	-	-	-	433.114	M-H, M+FA-H	C21H22O10	5.6964	0.00569291	93.5	0	-0.531974	-	-	5.9892	5.8002	5.88	4.6023	4.4859	4.5006	5.8661	5.9325	5.822	4.3484	4.3553	4.2975	5.6872	5.6914	5.6916
neg_2112	9(S)-HpOTrE	metab_4299	-	map00592;map01110	alpha-Linolenic acid metabolism;Biosynthesis of secondary metabolites	C16321	-	neg	-	-	Metabolism;Metabolism	Lipid metabolism;Global and overview maps	-	-	309.207	M-H	C18H30O4	6.834	0.00625616	43.9	0	-0.419604	111004-08-1	-	6.1415	5.9208	6.2487	5.7167	5.6801	5.7299	5.6156	5.6954	5.6368	5.5195	5.3676	5.4856	5.862	5.864	5.8586
neg_2133	DG(18:1(12Z)-O(9S,10R)/0:0/2:0)	metab_4322	-	-	-	-	HMDB0296970	neg	-	-	-	-	Not Available	Not Available	447.252	M+Cl	C23H40O6	6.8574	0.0145719	0	35.1	-0.611357	-	Not Available	5.2302	5.3186	5.1398	4.8227	4.8419	4.886	5.4986	4.6808	4.9467	4.8215	4.796	4.849	4.8661	4.8554	4.855
neg_2183	Dehydroepiandrosterone	metab_4369	-	map01100	Metabolic pathways	C01227	HMDB0000077;LMST02020021;HMDB0005962;PW_C000054;MJDBOTE0001055	neg	Steroids;Hormones and transmitters	19-Carbon atoms;Steroid hormones	Metabolism	Global and overview maps	Lipids and lipid-like molecules	Steroids and steroid derivatives	333.207	M+FA-H	C19H28O2	6.9982	0.0798117	0	90.3	0.154347	2283-82-1;53-43-0	Androstane steroids	4.8774	5.3805	5.1752	4.8182	4.5748	4.6447	5.1063	5.0081	5.1171	5.1917	4.8315	5.0317	5.017	4.9491	4.9739
neg_219	1-(1-Chloroethyl)-4-fluorobenzene	metab_4376	-	-	-	-	HMDB0243770	neg	-	-	-	-	Benzenoids	Benzene and substituted derivatives	315.051	2M-H, 3M-H	C8H8ClF	6.0645	0.00785765	0	32.5	-4.67436	-	Halobenzenes	5.8655	5.8198	5.7493	6.5939	6.511	6.5008	5.5271	5.5626	5.4676	6.2567	6.3086	6.3392	5.972	5.9788	5.9745
neg_2215	Trans-Hexa-dec-2-enoic acid	metab_4398	-	-	-	-	HMDB0010735;PW_C006742	neg	-	-	-	-	Lipids and lipid-like molecules	Fatty Acyls	567.463	2M+Hac-H	C16H30O2	7.0841	0.0250776	0	30.5	-0.411077	-	Fatty acids and conjugates	6.0081	5.7899	6.1239	5.6015	5.4568	5.5066	5.0412	5.2099	5.2014	5.326	4.4214	4.6413	5.6043	5.5857	5.5853
neg_2233	3-Methyl-5-pentyl-2-furannonanoic acid	metab_4416	-	-	-	-	HMDB0031091	neg	-	-	-	-	Lipids and lipid-like molecules	Fatty Acyls	661.469	2M+FA-H	C19H32O3	7.1775	0.0297615	0	74.1	0.20214	57818-39-0	Fatty acids and conjugates	5.6555	5.4251	5.2898	4.0677	4.0969	4.1612	5.7415	5.8209	5.7527	5.3286	5.1223	5.312	5.6629	5.6406	5.6408
neg_2282	PE(P-16:0/18:1(12Z)-2OH(9,10))	metab_4464	-	-	-	-	HMDB0285224	neg	-	-	-	-	Not Available	Not Available	754.503	M+Na-2H	C39H76NO9P	7.3935	0.21919	0	64.1	3.12708	-	Not Available	5.5105	5.3088	5.5862	4.9809	4.0609	4.3146	5.1631	5.3253	5.404	4.6631	4.0149	4.0679	4.7993	4.7219	4.6047
neg_26	3',6-Disinapoylsucrose	metab_4808	-	-	-	-	HMDB0040838	neg	-	-	-	-	Phenylpropanoids and polyketides	Cinnamic acids and derivatives	753.225	M-H, M+FA-H, M+Na-2H	C34H42O19	4.8589	0.00771177	94.9	0	0.843279	139891-98-8	Hydroxycinnamic acids and derivatives	6.3104	6.3804	6.2509	5.9062	5.1958	5.6102	6.5049	6.438	6.4261	5.9044	6.0383	5.9452	6.2792	6.2735	6.2733
neg_27	Cibaric acid	metab_4919	-	-	-	-	LMFA02000289;HMDB0038580	neg	-	-	-	-	Lipids and lipid-like molecules	Fatty Acyls	323.186	M-H, 2M+FA-H, M-H2O-H	C18H28O5	6.1831	0.00794691	0	69.4	-0.761675	130523-93-2	Lineolic acids and derivatives	5.514	5.376	5.5574	5.0388	5.1575	5.1443	5.0074	5.0358	4.8791	4.9634	4.8122	4.8466	5.1851	5.1806	5.1874
neg_288	Cer(d18:1/18:1(9Z)-O(12,13))	metab_5101	-	-	-	-	HMDB0290022	neg	-	-	-	-	Not Available	Not Available	622.505	M-H, M+FA-H	C36H67NO4	7.4478	0.0684486	0	66	-0.0552815	-	Not Available	6.139	6.1863	6.272	6.0141	5.617	5.7698	5.497	5.641	5.6412	5.4245	4.8836	5.0874	5.7444	5.6947	5.6931
neg_2884	PG(PGF1alpha/a-25:0)	metab_5104	-	-	-	-	HMDB0271042	neg	-	-	-	-	Not Available	Not Available	985.611	M+K-2H	C51H97O13P	7.3012	0.0127835	0	47.2	-4.2713	-	Not Available	6.2462	6.1259	5.993	5.1935	5.7006	5.7416	6.0755	5.8407	5.9196	5.0874	5.435	5.5143	6.1072	6.1092	6.0987
neg_2888	PA(18:2(9Z,12Z)/24:0)	metab_5108	-	map01100;map00564;map01110;map00561;map04070	Metabolic pathways;Glycerophospholipid metabolism;Biosynthesis of secondary metabolites;Glycerolipid metabolism;Phosphatidylinositol signaling system	C00416	PW_C062389;HMDB0114971	neg	Lipids	Phospholipids	Metabolism;Metabolism;Metabolism;Metabolism;Environmental Information Processing	Global and overview maps;Lipid metabolism;Global and overview maps;Lipid metabolism;Signal transduction	Lipids and lipid-like molecules	Glycerophospholipids	821.542	M+K-2H	C45H85O8P	7.2779	0.0423899	0	39.8	-5.70348	-	Glycerophosphates	5.8482	5.6103	5.3678	4.5831	4.6683	4.2468	5.6213	5.3472	5.1963	4.9865	4.5968	4.6537	5.4831	5.5157	5.4854
neg_2952	Oryzanol A	metab_5172	-	-	-	C17489	HMDB0035891	neg	-	-	-	-	Lipids and lipid-like molecules	Prenol lipids	601.426	M-H	C40H58O4	7.0372	0.0239058	0	31	0.239515	-	Sesquiterpenoids	6.2747	5.874	5.9175	5.532	5.1311	4.6335	6.3112	6.6332	6.7231	6.7739	6.3395	6.4131	5.4086	5.3923	5.3896
neg_3014	Deferoxamine	metab_5232	-	-	-	C06940	HMDB0014884;LMFA08020169;MJDBOTE0001596	neg	-	-	-	-	Organic acids and derivatives	Carboxylic acids and derivatives	597.305	M+K-2H	C25H48N6O8	6.8966	0.00860084	0	37.5	6.28761	70-51-9	Carboxylic acid derivatives	6.0981	6.1836	6.1026	5.5872	5.7876	5.7663	6.13	6.1269	5.9897	5.8985	5.9369	5.9272	6.0382	6.0319	6.0317
neg_3030	Testosterone	metab_5250	-	map01100	Metabolic pathways	C00535	LMST02020002;HMDB0002833;HMDB0000234;PW_C000157	neg	Steroids;Hormones and transmitters	19-Carbon atoms;Steroid hormones	Metabolism	Global and overview maps	Lipids and lipid-like molecules	Steroids and steroid derivatives	333.207	M+FA-H	C19H28O2	6.8653	0.0129575	0	87	0.328296	651-45-6;58-22-0	Sulfated steroids	5.4443	5.6789	5.5291	5.1078	5.0675	5.0441	5.3729	5.164	5.4873	5.4003	5.2674	5.478	5.3855	5.3875	5.3961
neg_3061	PG(18:1(11Z)/18:1(12Z)-O(9S,10R))	metab_5281	-	-	-	-	HMDB0268923	neg	-	-	-	-	Not Available	Not Available	833.52	M+FA-H	C42H77O11P	6.834	0.0137785	0	41.4	1.3369	-	Not Available	7.2462	7.5914	7.6865	7.8868	8.0138	7.9732	7.2399	7.5613	7.6023	7.8366	7.8318	7.8522	7.7456	7.7354	7.735
neg_3252	PE(18:3/0:0)	metab_5486	-	-	-	-	-	neg	-	-	-	-	-	-	474.262	M-H	C23H42NO7P	6.505	0.00825536	75.3	0	-0.324159	-	-	6.0173	6.096	6.0273	5.6954	5.5256	5.783	5.7049	5.6414	5.6887	5.1896	5.1988	5.3571	5.7902	5.7841	5.7839
neg_3355	N'-nitrosoanabasine	metab_5597	-	-	-	C19477	HMDB0041939	neg	-	-	-	-	Alkaloids and derivatives	Not Available	236.105	M+FA-H	C10H13N3O	6.3085	0.0275888	0	33	4.57952	1133-64-8;37620-20-5	Not Available	4.2755	4.2571	4.3684	4.8455	4.7642	4.7683	4.5029	4.3753	4.3288	4.7799	4.5846	4.7437	4.4989	4.4939	4.5166
neg_3370	HMDB0304547	metab_5614	-	-	-	-	-	neg	-	-	-	-	-	-	236.141	M+Na-2H	C12H23O3-	6.2771	0.0107049	0	43.3	9.40509	-	-	4.7288	4.7984	4.8164	5.0413	5.1905	5.1653	4.9155	4.9066	4.9347	5.1583	5.1265	5.2622	4.9946	5.0025	5.0028
neg_3379	(9E)-Octadec-9-enedioylcarnitine	metab_5623	-	-	-	-	HMDB0241537	neg	-	-	-	-	Lipids and lipid-like molecules	Fatty Acyls	492.273	M+K-2H	C25H45NO6	6.2536	0.0357676	0	36.6	-0.306895	-	Fatty acid esters	6.0589	5.6246	6.0447	5.5106	5.3262	5.5469	5.4912	5.4557	5.6002	4.8806	4.9612	4.7806	5.6431	5.6163	5.6166
neg_3413	Sulfasalazine	metab_5662	-	-	-	C07316	HMDB0014933	neg	-	-	-	-	Organoheterocyclic compounds	Azobenzenes	419.041	M+Na-2H	C18H14N4O5S	6.1988	0.0167642	0	48.3	-5.9528	599-79-1	Not Available	5.8383	5.8178	5.5539	6.3374	6.6388	6.6429	6.0083	5.9789	5.819	6.444	6.6374	6.6957	6.1826	6.1951	6.1955
neg_3429	DG(14:0/0:0/PGE2)	metab_5679	-	-	-	-	HMDB0295079	neg	-	-	-	-	Not Available	Not Available	681.457	M+FA-H	C37H64O8	6.1669	0.0256344	0	75.5	-2.59775	-	Not Available	5.7734	5.4035	5.8315	5.3575	5.1572	5.1717	4.8728	4.8892	4.9373	4.6776	4.0108	4.3315	5.2741	5.2553	5.2545
neg_3500	5-Taurinomethyl-2-thiouridine	metab_5759	-	-	-	-	HMDB0011610	neg	-	-	-	-	Nucleosides, nucleotides, and analogues	Pyrimidine nucleosides	378.047	M-H2O-H	C12H19N3O8S2	6.0723	0.0595809	0	62.4	7.58633	497258-54-5	Not Available	4.7748	4.6656	4.5663	5.1842	5.0619	5.0952	4.0753	4.3055	3.8987	5.0587	5.0903	5.2312	4.8334	4.7887	4.8353
neg_3503	5-Formyl-2H-pyran-6-carboxamide	metab_5762	-	-	-	-	HMDB0260351	neg	-	-	-	-	Organoheterocyclic compounds	Pyrans	152.034	M-H	C7H7NO3	6.0723	0.00512067	0	30.8	-5.65828	-	Not Available	4.2378	4.3293	4.286	4.5932	4.6734	4.667	4.3396	4.3726	4.4443	4.6747	4.6203	4.6898	4.4731	4.4709	4.4754
neg_3515	Aflatoxin B1 diol	metab_5775	-	-	-	C19588	HMDB0060430	neg	-	-	-	-	Phenylpropanoids and polyketides	Coumarins and derivatives	367.046	M+Na-2H	C17H14O8	6.0566	0.00901159	0	47.1	5.89616	50668-79-6	Furanocoumarins	5.3451	5.2242	5.101	5.7626	5.8357	5.8978	5.6101	5.4284	5.5107	5.8371	5.8521	5.951	5.5979	5.5999	5.5923
neg_3528	Ayapin	metab_5789	-	-	-	C18078	HMDB0301806	neg	-	-	-	-	Phenylpropanoids and polyketides	Coumarins and derivatives	235.024	M+FA-H	C10H6O4	6.0488	0.0460871	0	57.1	-1.93729	494-56-4	Not Available	3.3456	3.0358	3.0628	4.3936	4.6685	4.4986	3.3355	3.3301	3.1726	4.4596	4.3669	4.7865	4.1035	4.1051	4.1385
neg_3560	6a, 3'-p-Dihydroxypaclitaxel	metab_5822	-	-	-	-	HMDB0060795	neg	-	-	-	-	Benzenoids	Benzene and substituted derivatives	924.243	M+Cl	C45H47NO18	5.9931	0.023343	0	81.4	-6.71578	-	Benzoic acids and derivatives	5.7897	5.8583	5.8212	5.3723	5.2754	5.2667	5.3934	5.4836	5.7036	4.9652	5.0489	5.2113	5.5657	5.5482	5.5483
neg_3578	2,4,6-Trihydroxybenzoic acid	metab_5841	-	-	-	-	HMDB0029649	neg	-	-	-	-	Benzenoids	Benzene and substituted derivatives	151.003	M-H2O-H	C7H6O5	5.971	0.0117152	0	38.8	-5.3409	83-30-7	Benzoic acids and derivatives	4.4713	4.4515	4.3533	4.9729	4.9245	5.0454	4.4099	4.4796	4.4141	4.8226	4.532	4.7512	4.6127	4.6182	4.6229
neg_3586	Ent-Gallocatechin 3-gallate	metab_5850	-	-	-	-	HMDB0301673	neg	-	-	-	-	Phenylpropanoids and polyketides	Flavonoids	439.067	M-H2O-H	C22H18O11	5.9572	0.00602908	0	68	-0.0847365	68-22-4	Flavonoid glycosides	5.6421	5.6576	5.7657	5.2586	5.4141	5.2992	5.7478	5.6543	5.8513	5.037	5.0448	5.0745	5.5878	5.5864	5.5915
neg_360	Heptanoylcarnitine	metab_5866	-	-	-	-	HMDB0013238;LMFA07070068	neg	-	-	-	-	Lipids and lipid-like molecules	Fatty Acyls	605.406	2M+FA-H, 2M+Hac-H	C14H27NO4	6.8574	0.0193522	0	45.8	7.56939	-	Fatty acid esters	5.5838	5.4045	5.4299	5.1132	4.5113	4.4789	5.7895	5.7477	5.792	5.3123	5.2324	5.4549	5.7136	5.699	5.6992
neg_3612	Chenodeoxycholylasparagine	metab_5880	-	-	-	-	HMDB0242399	neg	-	-	-	-	Lipids and lipid-like molecules	Steroids and steroid derivatives	543.281	M+K-2H	C28H46N2O6	5.9064	0.0114039	0	71.7	-5.48624	-	Bile acids, alcohols and derivatives	5.4777	5.685	5.6036	5.1896	5.0492	5.2043	5.2817	5.0319	5.1518	4.892	5.0254	5.0373	5.3404	5.3317	5.3319
neg_3619	5,7-Dihydroxy-4H-1-benzopyran-4-one	metab_5887	-	-	-	C09001	HMDB0032950	neg	-	-	-	-	Organoheterocyclic compounds	Benzopyrans	223.024	M+FA-H	C9H6O4	5.8882	0.0343644	0	33	-3.22166	31721-94-5	1-benzopyrans	2.5483	2.554	2.595	4.6263	4.4221	4.7926	2.5283	2.4963	2.5029	4.3067	3.3162	3.9585	3.8504	3.8533	3.8773
neg_3624	Gomphidic acid	metab_5893	-	-	-	-	HMDB0033542	neg	-	-	-	-	Benzenoids	Phenols	371.041	M-H	C18H12O9	5.8699	0.0418864	0	50.4	-0.828805	25328-77-2	Benzenetriols and derivatives	4.1493	4.0498	3.897	5.0573	5.3334	5.0953	4.2058	3.8922	4.1205	5.1564	5.0795	5.5437	4.7952	4.8272	4.8272
neg_3627	5,8-Dihydroxy-1,4-naphthoquinone	metab_5896	-	-	-	C01938	HMDB0255448	neg	-	-	-	-	Benzenoids	Naphthalenes	235.024	M+FA-H	C10H6O4	5.8699	0.028051	0	61.5	-2.05468	475-38-7	Naphthoquinones	3.564	3.5049	3.3403	4.9347	5.2103	5.0248	4.1019	3.9025	3.8389	5.1305	5.0679	5.4945	4.7039	4.7059	4.7258
neg_3663	Quercetin 3-O-rhamnoside	metab_5936	-	map00944	Flavone and flavonol biosynthesis	C01750	HMDB0257017;HMDB0033751	neg	-	-	Metabolism	Biosynthesis of other secondary metabolites	Phenylpropanoids and polyketides	Flavonoids	469.077	M+Na-2H	C21H20O11	5.7033	0.00474277	0	70	4.8699	522-12-3	Flavonoid glycosides	5.5198	5.5695	5.267	6.1684	6.3892	6.1874	5.8324	5.7037	5.5976	6.1394	6.4422	6.3071	5.9478	5.9512	5.9515
neg_3664	Azlocillin	metab_5937	-	-	-	C06839	HMDB0015194	neg	-	-	-	-	Organic acids and derivatives	Carboxylic acids and derivatives	496.11	M+Cl	C20H23N5O6S	5.6964	0.00804652	0	56.3	7.56633	37091-66-0	Amino acids, peptides, and analogues	5.7197	5.5065	5.583	4.5602	4.4618	4.4087	5.5802	5.6462	5.5123	4.3329	4.4691	4.6132	5.3297	5.3366	5.332
neg_3677	Lactose 6-phosphate	metab_5951	-	map01100;map00052	Metabolic pathways;Galactose metabolism	C05396	HMDB0006789	neg	-	-	Metabolism;Metabolism	Global and overview maps;Carbohydrate metabolism	Organic oxygen compounds	Organooxygen compounds	403.067	M-H2O-H	C12H23O14P	5.619	0.0220707	0	37.8	5.15032	-	Carbohydrates and carbohydrate conjugates	3.046	3.0517	3.0787	4.9975	5.0288	5.1607	3.026	2.9939	3.0006	4.7984	5.1607	4.8119	4.4781	4.48	4.4624
neg_3692	6''-O-Acetylglycitin	metab_5968	-	-	-	-	HMDB0039489	neg	-	-	-	-	Phenylpropanoids and polyketides	Isoflavonoids	509.109	M+Na-2H	C24H24O11	5.5432	0.018839	0	74.8	4.69089	134859-96-4	Isoflavonoid O-glycosides	4.2878	4.3607	4.277	5.7166	5.5044	5.8179	3.6513	3.5761	3.7511	5.2895	5.2128	5.161	4.898	4.9132	4.9005
neg_3699	3-Dehydroquinic acid	metab_5974	-	map01100;map00400;map01110;map01230	Metabolic pathways;Phenylalanine, tyrosine and tryptophan biosynthesis;Biosynthesis of secondary metabolites;Biosynthesis of amino acids	C00944	HMDB0012710	neg	-	-	Metabolism;Metabolism;Metabolism;Metabolism	Global and overview maps;Amino acid metabolism;Global and overview maps;Global and overview maps	Organic acids and derivatives	Hydroxy acids and derivatives	211.024	M+Na-2H	C7H10O6	5.5304	0.0100404	0	45.1	9.44343	10534-44-8	Alpha hydroxy acids and derivatives	5.4953	5.6672	5.4257	6.9505	6.8826	7.11	5.6495	5.6277	5.4226	6.6702	6.3535	6.4516	6.3953	6.3975	6.4037
neg_3704	(E)-3-[1-(Benzenesulfonyl)indol-5-yl]-N-hydroxyprop-2-enamide	metab_5981	-	-	-	-	HMDB0249930	neg	-	-	-	-	Phenylpropanoids and polyketides	Cinnamic acids and derivatives	683.126	2M-H	C17H14N2O4S	5.5078	0.017799	0	36.5	-2.28661	-	Not Available	6.363	6.3541	6.3141	5.5291	5.3156	5.3859	6.107	6.3153	6.2239	5.2532	5.0422	4.8981	6.0905	6.0772	6.0772
neg_3712	Morin	metab_5990	-	-	-	C10105	HMDB0030796;LMPK12112517;MJDBOTE0001649	neg	-	-	-	-	Phenylpropanoids and polyketides	Flavonoids	603.078	2M-H	C15H10O7	5.4655	0.00452264	0	80.2	0.613644	480-16-0	Flavones	6.8295	6.9872	6.6299	6.0237	6.0113	5.9458	6.8938	7.0028	6.801	5.9749	5.9634	5.7542	6.6793	6.6765	6.6755
neg_3719	Quercitrin	metab_5997	-	map00944	Flavone and flavonol biosynthesis	C01750	HMDB0257017;LMPK12112171;HMDB0033751	neg	-	-	Metabolism	Biosynthesis of other secondary metabolites	Phenylpropanoids and polyketides	Flavonoids	469.078	M+Na-2H	C21H20O11	5.4275	0.00565597	0	70.7	5.16052	522-12-3	Flavonoid glycosides	5.3708	5.3963	5.1173	5.9257	6.2012	5.9563	5.6597	5.5093	5.3708	5.9076	6.2347	6.0795	5.7516	5.7536	5.7565
neg_3726	Chlorazine	metab_6005	-	-	-	C06906	HMDB0250090;HMDB0014620	neg	-	-	-	-	Organoheterocyclic compounds	Triazines	559.276	2M+FA-H	C11H20ClN5	5.4033	0.0106706	0	62.2	-6.93618	50-53-3	Aminotriazines	5.1833	5.5587	5.3793	5.0631	4.7464	4.896	4.9681	4.8745	4.8008	4.2356	4.1725	4.1488	5.0902	5.0821	5.0823
neg_3730	Gossypetin	metab_6009	-	-	-	C04109	LMPK12113231	neg	-	-	-	-	-	-	299.019	M-H2O-H	C15H10O8	5.3979	0.01291	46	0	-0.81152	489-35-0	-	5.9432	5.9308	5.921	7.7237	7.5956	7.4803	6.2599	6.2234	6.108	6.7653	7.5061	6.9102	6.4608	6.4703	6.4707
neg_3739	Helonioside A	metab_6018	-	-	-	-	-	neg	-	-	-	-	-	-	693.204	M-H	C32H38O17	5.3555	0.0116231	53.8	0	0.793113	-	-	5.3668	5.418	5.4224	4.9943	4.2531	4.5444	5.7415	5.6129	5.5389	5.2385	5.2745	5.3503	5.4084	5.3998	5.3996
neg_3742	Advantame	metab_6022	-	-	-	-	HMDB0248034	neg	-	-	-	-	Organic acids and derivatives	Carboxylic acids and derivatives	493.172	M+Cl	C24H30N2O7	5.3491	0.00419543	0	32.7	-6.95244	-	Amino acids, peptides, and analogues	4.9765	4.9342	5.1015	4.469	4.5327	4.6214	5.5004	5.3668	5.4385	4.8924	4.8439	4.859	5.1259	5.1227	5.1229
neg_3770	Homopisatin	metab_6053	-	-	-	C10539	HMDB0034116;LMPK12070130	neg	-	-	-	-	Phenylpropanoids and polyketides	Isoflavonoids	345.098	M+FA-H	C17H16O5	5.2027	0.0206561	0	36.8	-0.945166	3187-52-8	Furanoisoflavonoids	5.2853	5.1388	5.1889	4.8417	4.8048	4.8643	4.3315	4.6405	4.316	3.9636	3.9381	3.991	4.8557	4.8714	4.8713
neg_3775	Coniferyl ferulate	metab_6058	-	-	-	C17855	HMDB0250437	neg	-	-	-	-	Phenylpropanoids and polyketides	Cinnamic acids and derivatives	401.124	M+FA-H	C20H20O6	5.1958	0.00276051	0	63.5	-0.751973	63644-62-2	Hydroxycinnamic acids and derivatives	5.3722	5.4022	5.9278	3.6565	3.6757	3.7198	4.7084	4.5857	5.2179	3.6554	3.6298	3.6828	5.2279	5.2284	5.2302
neg_3776	Clemaphenol A	metab_6059	-	-	-	C17808	-	neg	-	-	-	-	-	-	357.134	M-H	C20H22O6	5.1958	0.0149663	65.2	0	-0.556731	-	-	4.7414	4.7296	5.3047	3.939	3.9583	4.0024	4.0752	3.7972	4.531	3.9379	3.9124	3.9654	4.553	4.5642	4.5644
neg_3797	1-Methoxy-1-(2,4,5-trimethoxyphenyl)-2-propanol	metab_6082	-	-	-	-	HMDB0031772	neg	-	-	-	-	Benzenoids	Benzene and substituted derivatives	557.26	2M+FA-H	C13H20O5	5.1147	0.00407272	0	45.2	0.20582	98205-47-1	Phenylpropanes	5.8593	5.9616	6.0032	5.6417	5.4797	5.6138	5.6407	5.4001	5.5044	5.0596	5.2259	5.1067	5.7209	5.7178	5.7179
neg_3798	Glycineamideribotide	metab_6083	-	map01100;map01110;map00230	Metabolic pathways;Biosynthesis of secondary metabolites;Purine metabolism	C03838	HMDB0002022;PW_C001355	neg	-	-	Metabolism;Metabolism;Metabolism	Global and overview maps;Global and overview maps;Nucleotide metabolism	Nucleosides, nucleotides, and analogues	Glycinamide ribonucleotides	617.115	2M+FA-H	C7H15N2O8P	5.1093	0.0314728	0	34.8	5.99258	10074-18-7	Not Available	5.5185	5.6417	5.2609	6.3062	6.4369	6.3355	5.2034	5.3311	4.9793	5.6151	6.0781	5.8224	5.8129	5.8156	5.7905
neg_3814	Acacetin 7-[apiosyl(1->6)-glucoside]	metab_6102	-	map00944	Flavone and flavonol biosynthesis	C01470	HMDB0035023	neg	-	-	Metabolism	Biosynthesis of other secondary metabolites	Phenylpropanoids and polyketides	Flavonoids	623.162	M+FA-H	C27H30O14	5.054	0.0234799	0	33.2	0.477378	239106-94-6	Flavonoid glycosides	5.0716	5.1614	5.0417	4.7964	4.6659	4.7573	4.5552	4.7124	4.678	4.2842	4.3643	4.1589	4.8861	4.8687	4.8685
neg_3816	Gein	metab_6104	-	-	-	C17058	HMDB0029909	neg	Steroids	24-Carbon atoms	-	-	Organic oxygen compounds	Organooxygen compounds	479.156	M+Na-2H	C21H30O11	5.0397	0.0546912	0	39.5	4.60965	585-90-0	Carbohydrates and carbohydrate conjugates	4.4568	4.4348	4.7694	3.4414	3.4687	4.0406	5.2629	5.2041	5.4324	4.3799	4.6428	4.4508	4.88	4.8826	4.8395
neg_3819	Neoeriocitrin	metab_6107	-	-	-	C09805	LMPK12140359;HMDB0255521	neg	-	-	-	-	Phenylpropanoids and polyketides	Flavonoids	595.166	M-H	C27H32O15	5.0324	0.0370156	0	69.4	-1.41131	13241-32-2	Flavonoid glycosides	4.6195	5.0049	4.7311	4.3342	4.0858	4.172	4.8696	4.9104	5.455	4.6975	4.6086	4.6417	4.9065	4.9093	4.8798
neg_3835	Butin	metab_6125	-	map00941	Flavonoid biosynthesis	C09614	LMPK12140075;HMDB0249463	neg	-	-	Metabolism	Biosynthesis of other secondary metabolites	Phenylpropanoids and polyketides	Flavonoids	317.066	M+FA-H	C15H12O5	4.9633	0.0120972	0	58.7	-0.954366	492-14-8	Flavans	4.7258	4.9436	4.6162	5.5759	6.2136	5.6809	3.9304	4.3101	3.9112	4.969	5.2763	5.4086	5.3331	5.3431	5.3354
neg_3837	Chorismate	metab_6127	-	map01100;map00996;map01110;map01240;map00130;map00999;map01230;map00790;map00400	Metabolic pathways;Biosynthesis of various alkaloids;Biosynthesis of secondary metabolites;Biosynthesis of cofactors;Ubiquinone and other terpenoid-quinone biosynthesis;Biosynthesis of various plant secondary metabolites;Biosynthesis of amino acids;Folate biosynthesis;Phenylalanine, tyrosine and tryptophan biosynthesis	C00251	HMDB0012199	neg	-	-	Metabolism;Metabolism;Metabolism;Metabolism;Metabolism;Metabolism;Metabolism;Metabolism;Metabolism	Global and overview maps;Biosynthesis of other secondary metabolites;Global and overview maps;Global and overview maps;Metabolism of cofactors and vitamins;Biosynthesis of other secondary metabolites;Global and overview maps;Metabolism of cofactors and vitamins;Amino acid metabolism	Organic acids and derivatives	Carboxylic acids and derivatives	451.088	2M-H	C10H10O6	4.9505	0.0112604	0	57.3	-0.167729	617-12-9	Dicarboxylic acids and derivatives	5.022	5.1799	4.5723	3.6525	3.4763	4.0914	5.7523	5.7505	5.8299	4.9381	5.1719	5.0514	5.3206	5.3252	5.3155
neg_3840	Luteolin 6-C-glucosyl-O-arabinoside	metab_6131	-	-	-	-	HMDB0302350	neg	-	-	-	-	Phenylpropanoids and polyketides	Flavonoids	601.118	M+Na-2H	C26H28O15	4.9303	0.0311784	0	59.3	1.51531	-	Flavonoid glycosides	4.748	4.9102	4.7826	5.7738	5.8066	5.7645	5.3785	5.3147	5.3052	5.4221	5.6599	5.5017	5.3684	5.3705	5.3459
neg_3853	Nocardamine	metab_6145	-	-	-	-	-	neg	-	-	-	-	-	-	599.341	M-H	C27H48N6O9	4.8806	0.00426777	72.1	0	0.404131	-	-	5.9261	4.4775	5.6681	3.4961	3.5154	3.5594	3.3864	4.1165	3.3609	3.495	3.4695	3.5224	5.0294	5.0268	5.0259
neg_3857	L-arogenate	metab_6149	-	map01100;map00400;map01110;map01230	Metabolic pathways;Phenylalanine, tyrosine and tryptophan biosynthesis;Biosynthesis of secondary metabolites;Biosynthesis of amino acids	C00826	HMDB0304400;HMDB0304809	neg	-	-	Metabolism;Metabolism;Metabolism;Metabolism	Global and overview maps;Amino acid metabolism;Global and overview maps;Global and overview maps	Organic acids and derivatives	Carboxylic acids and derivatives	263.02	M+K-2H	C10H12NO5-	4.8806	0.0239445	0	51.6	-2.87344	53078-86-7	Amino acids, peptides, and analogues	3.9566	3.8833	3.9139	4.4081	4.4723	4.5397	4.1611	3.987	3.9943	4.6967	4.8615	4.5769	4.353	4.372	4.3554
neg_386	PA(18:1(12Z)-O(9S,10R)/12:0)	metab_6152	-	-	-	-	HMDB0262803	neg	-	-	-	-	Not Available	Not Available	631.401	M-H, M+Cl	C33H61O9P	6.4737	0.00905678	0	62.3	4.04443	-	Not Available	4.9766	5.8145	4.9532	3.5381	4.0731	3.7894	3.4284	3.3963	4.3945	3.537	3.5115	3.5645	4.8016	4.8038	4.7961
neg_3860	Taxifolin 3-arabinoside	metab_6153	-	-	-	-	HMDB0041418	neg	-	-	-	-	Phenylpropanoids and polyketides	Diarylheptanoids	435.093	M-H	C20H20O11	4.8732	0.0214487	0	57.8	-0.359062	-	Cyclic diarylheptanoids	4.3927	4.2903	4.3078	3.2479	3.601	3.3112	4.8757	4.8511	4.781	4.3431	4.5293	4.1101	4.5539	4.5377	4.5379
neg_3863	Tamarixetin	metab_6156	-	-	-	C10188	HMDB0002937;LMPK12110606	neg	-	-	-	-	Phenylpropanoids and polyketides	Flavonoids	363.072	M+FA-H	C16H14O7	4.8589	0.0311771	0	83.3	-0.547141	603-61-2	O-methylated flavonoids	4.804	4.6694	4.8153	4.1566	4.1759	4.22	4.4923	4.7245	4.0214	4.1555	4.13	4.1829	4.3585	4.3802	4.3837
neg_3879	Benazeprilat	metab_6173	-	-	-	C21541	HMDB0060582;PW_C040467	neg	-	-	-	-	Organic acids and derivatives	Carboxylic acids and derivatives	433.114	M+K-2H	C22H24N2O5	4.7938	0.0177095	0	45.6	-8.19329	86541-78-8	Amino acids, peptides, and analogues	4.7921	4.5385	4.784	5.3399	5.3413	5.4356	4.9035	5.1337	4.718	5.2253	5.2803	5.3122	5.0894	5.0774	5.0918
neg_3897	Gallic acid	metab_6193	-	map00999	Biosynthesis of various plant secondary metabolites	C01424	HMDB0005807	neg	-	-	Metabolism	Biosynthesis of other secondary metabolites	Benzenoids	Benzene and substituted derivatives	151.003	M-H2O-H	C7H6O5	4.7224	0.0168878	0	47.2	-5.25811	149-91-7	Benzoic acids and derivatives	4.3816	4.3628	4.2789	4.725	4.9604	4.7753	4.2894	4.3554	4.1318	4.409	4.4584	4.5225	4.4675	4.4695	4.4811
neg_3901	Diethyl oxalpropionate	metab_6199	-	-	-	C04067	HMDB0032306	neg	-	-	-	-	Organic acids and derivatives	Keto acids and derivatives	223.061	M+Na-2H	C9H14O5	4.7145	0.0173211	0	34.5	9.38838	759-65-9	Beta-keto acids and derivatives	4.8151	4.3762	4.526	4.9538	4.9654	5.0204	3.802	3.5228	3.8015	4.5417	4.4993	4.5642	4.5521	4.5542	4.566
neg_3902	Patulin	metab_6200	-	-	-	C16748	HMDB0034299	neg	-	-	-	-	Organoheterocyclic compounds	Pyrans	153.018	M-H	C7H6O4	4.7145	0.00989316	64.7	0	-5.72916	149-29-1	Not Available	6.378	6.3898	6.2856	6.793	7.0212	6.8505	6.3402	6.4193	6.1768	6.4907	6.5433	6.6174	6.5197	6.5269	6.5274
neg_3906	Catechin 7-glucoside	metab_6204	-	-	-	C09617	HMDB0037949	neg	-	-	-	-	Phenylpropanoids and polyketides	Flavonoids	433.114	M-H2O-H	C21H24O11	4.6988	0.0333396	0	68.4	-0.343009	65597-47-9	Flavonoid glycosides	4.2681	3.9509	4.1848	5.0839	5.0642	5.0643	4.3322	4.5711	4.2861	4.9592	4.9932	4.9072	4.6899	4.6928	4.6662
neg_3931	Flavonol 3-O-D-glucoside	metab_6232	-	-	-	C03946	HMDB0252295	neg	-	-	-	-	Phenylpropanoids and polyketides	Flavonoids	445.114	M+FA-H	C21H20O8	4.6059	0.0298898	0	36.9	-0.0502294	-	Flavonoid glycosides	4.2508	4.4447	4.9749	5.2319	5.2456	5.2656	3.3433	3.538	4.0101	4.7222	5.0225	4.6102	4.7143	4.6927	4.7164
neg_3939	Alpha-L-Rhamnopyranosyl-(1->3)-alpha-D-galactopyranosyl-(1->3)-L-fucose	metab_6240	-	-	-	-	HMDB0039741	neg	-	-	-	-	Organic oxygen compounds	Organooxygen compounds	509.13	M+K-2H	C18H32O14	4.5852	0.00358506	0	75	4.565	71144-75-7	Carbohydrates and carbohydrate conjugates	5.7888	5.8307	5.8264	5.4745	5.4277	5.4894	5.0823	5.2014	5.4318	4.5431	4.7139	4.4131	5.5263	5.5283	5.5252
neg_3960	Aurintricarboxylic acid	metab_6264	-	-	-	-	HMDB0248731	neg	-	-	-	-	Benzenoids	Benzene and substituted derivatives	467.062	M+FA-H	C22H14O9	4.5287	0.00202351	0	60.8	-0.446705	-	Diphenylmethanes	3.0116	3.4076	3.0443	5.5456	5.6229	5.6107	3.1514	3.9345	3.4336	5.3694	5.5374	5.4542	5.0092	5.0075	5.0078
neg_3964	1-O-Caffeoyl-beta-D-glucose	metab_6268	-	-	-	C10433	HMDB0302440	neg	-	-	-	-	Lipids and lipid-like molecules	Steroids and steroid derivatives	363.072	M+Na-2H	C15H18O9	4.5104	0.0342788	0	59.9	6.78331	-	Stigmastanes and derivatives	4.8492	4.6762	4.8204	4.326	4.3453	4.3893	4.5465	4.8516	4.1908	4.3249	4.2993	4.3523	4.3599	4.3854	4.3864
neg_397	(Z)-5-[(2R,3S,4S)-4-Hydroxy-2-[(E)-3-hydroxyoct-1-enyl]oxan-3-yl]pent-3-enoic acid	metab_6274	-	-	-	-	HMDB0244345	neg	-	-	-	-	Organic acids and derivatives	Hydroxy acids and derivatives	307.191	M-H2O-H, M+Na-2H	C18H30O5	6.2301	0.00613484	0	64	-0.231857	-	Medium-chain hydroxy acids and derivatives	6.3306	6.168	6.3418	5.7027	5.7203	5.7753	5.9447	5.8447	5.8565	5.8058	5.6588	5.7307	6.0198	6.0247	6.0206
neg_3986	Vanillin	metab_6292	-	map01100;map00996;map01110	Metabolic pathways;Biosynthesis of various alkaloids;Biosynthesis of secondary metabolites	C00755	HMDB0245834;HMDB0012308;MJDBOTE0000374	neg	-	-	Metabolism;Metabolism;Metabolism	Global and overview maps;Biosynthesis of other secondary metabolites;Global and overview maps	Benzenoids	Phenols	151.039	M-H	C8H8O3	4.4066	0.0082751	77.5	0	-5.89208	121-33-5	Methoxyphenols	3.9233	3.9768	4.0559	4.4998	4.5424	4.5045	4.0364	4.0109	4.027	4.543	4.544	4.7122	4.2236	4.2257	4.2306
neg_3996	Gulonic acid	metab_6303	-	map01100;map00040;map00053;map01240	Metabolic pathways;Pentose and glucuronate interconversions;Ascorbate and aldarate metabolism;Biosynthesis of cofactors	C00800	HMDB0003290	neg	-	-	Metabolism;Metabolism;Metabolism;Metabolism	Global and overview maps;Carbohydrate metabolism;Carbohydrate metabolism;Global and overview maps	Organic acids and derivatives	Hydroxy acids and derivatives	233.009	M+K-2H	C6H12O7	4.3693	0.0093637	0	40.6	9.35322	526-97-6;20246-53-1	Medium-chain hydroxy acids and derivatives	3.4788	3.4274	3.3132	5.1069	5.1957	5.2135	3.6712	3.3137	3.4376	5.1435	5.1725	5.2962	4.7085	4.7121	4.7166
neg_3999	Sakebiose	metab_6306	-	-	-	C01518	HMDB0029882	neg	Carbohydrates	Oligosaccharides	-	-	Organic oxygen compounds	Organooxygen compounds	379.067	M+K-2H	C12H22O11	4.3614	0.00278533	0	66.3	6.27977	497-48-3	Carbohydrates and carbohydrate conjugates	4.7653	4.5603	4.582	5.4866	5.4493	5.5517	5.0137	5.088	4.9273	5.7538	5.9585	5.7361	5.2937	5.2941	5.2959
neg_4000	L-N-(1H-Indol-3-ylacetyl)aspartic acid	metab_6310	-	-	-	-	HMDB0038666	neg	-	-	-	-	Organic acids and derivatives	Carboxylic acids and derivatives	289.083	M-H	C14H14N2O5	4.3614	0.0054041	0	37.2	-0.532833	2456-73-7	Amino acids, peptides, and analogues	4.2453	4.3057	4.2797	4.622	4.618	5.0334	3.8674	3.8065	3.9084	4.2248	4.6192	4.8633	4.3728	4.3748	4.3775
neg_4001	7-Hydroxy-2-methyl-4-oxo-4H-1-benzopyran-5-carboxylic acid	metab_6311	-	-	-	-	HMDB0036346	neg	-	-	-	-	Organoheterocyclic compounds	Benzopyrans	219.029	M-H	C11H8O5	4.3614	0.0134048	0	41.7	-2.51569	-	1-benzopyrans	4.4324	4.4796	4.3709	3.4089	3.9159	3.7401	5.0386	4.9209	4.8046	4.1058	4.1692	4.2006	4.5194	4.5214	4.5303
neg_4013	Gentisin	metab_6324	-	-	-	C10066	HMDB0031760	neg	-	-	-	-	Organoheterocyclic compounds	Benzopyrans	303.051	M+FA-H	C14H10O5	4.3241	0.0078582	0	66.9	-0.799697	437-50-3	1-benzopyrans	5.6375	5.8182	5.5164	6.6954	7.3742	6.8421	5.1382	5.3723	5.0041	6.0823	6.5797	6.6467	6.5164	6.5222	6.5225
neg_4017	1,6-Bis-O-(3,4-dihydroxybenzoyl)-?-D-glucopyranose	metab_6328	-	-	-	-	-	neg	-	-	-	-	-	-	451.088	M-H	C20H20O12	4.2965	0.00701999	90.2	0	-0.258742	-	-	4.9322	5.0917	4.8157	4.4927	4.3769	4.6393	5.7483	5.8734	5.9502	5.3323	5.5751	5.301	5.4515	5.4461	5.4464
neg_4052	Glucorhein	metab_6366	-	-	-	-	HMDB0032877	neg	-	-	-	-	Benzenoids	Anthracenes	467.062	M+Na-2H	C21H18O11	4.1577	0.0144947	0	39.6	5.17634	34298-86-7	Anthracenecarboxylic acids and derivatives	3.6192	3.7125	3.2665	5.388	5.4219	5.4826	4.2597	4.4488	4.0652	5.2171	5.4523	5.2989	4.925	4.914	4.9143
neg_4056	Gluconasturtiin	metab_6370	-	map01210;map01110;map00966	2-Oxocarboxylic acid metabolism;Biosynthesis of secondary metabolites;Glucosinolate biosynthesis	C08417	HMDB0038423	neg	-	-	Metabolism;Metabolism;Metabolism	Global and overview maps;Global and overview maps;Biosynthesis of other secondary metabolites	Organic oxygen compounds	Organooxygen compounds	422.055	M-H	C15H21NO9S2	4.142	0.0766814	0	65.1	-7.66208	499-30-9	Carbohydrates and carbohydrate conjugates	4.4583	4.9501	4.3504	3.9541	3.8079	3.7458	1.7438	1.7122	1.7187	1.8506	1.8255	1.8777	4.2241	4.1668	4.2274
neg_4061	S-Nitroglutathione	metab_6376	-	-	-	-	HMDB0257410	neg	-	-	-	-	Organic acids and derivatives	Carboxylic acids and derivatives	749.136	2M+FA-H	C10H16N4O8S	4.1198	0.0131581	0	50.9	0.433057	-	Amino acids, peptides, and analogues	6.6168	6.5937	6.5375	6.1725	6.2773	6.2674	6.5595	6.5166	6.3921	5.7572	6.013	5.8529	6.4522	6.4423	6.4424
neg_4070	4-p-Coumaroylquinic acid	metab_6386	-	-	-	C10441	HMDB0302093;HMDB0301710	neg	-	-	-	-	Organic oxygen compounds	Organooxygen compounds	337.093	M-H	C16H18O8	4.0889	0.00285063	0	55.2	-0.303948	93451-44-6	Alcohols and polyols	4.3681	4.1944	4.4368	4.9145	4.9597	5.0118	5.0238	5.2801	5.2555	5.2576	5.4696	5.1911	5.0035	5.0046	5.006
neg_4071	2'-hydroxypseudobaptigenin	metab_6387	-	-	-	C03662	HMDB0304037	neg	-	-	-	-	Phenylpropanoids and polyketides	Isoflavonoids	313.035	M-H	C16H10O7	4.0889	0.0249473	0	43.6	-0.248554	-	Isoflav-2-enes	5.2244	4.9942	5.0104	4.501	4.5129	4.528	4.3201	4.5741	3.9263	3.393	3.7459	3.4204	4.7711	4.7897	4.7903
neg_4082	Cndac	metab_6398	-	-	-	-	HMDB0250381	neg	-	-	-	-	Nucleosides, nucleotides, and analogues	Pyrimidine nucleosides	289.035	M+K-2H	C10H12N4O4	4.0423	0.0273125	0	39	3.01884	-	Pyrimidine 2''-deoxyribonucleosides	4.7493	5.0886	4.5453	5.3974	5.3656	5.5324	4.9466	5.0953	4.8433	5.3079	5.3869	5.3183	5.1366	5.1387	5.1579
neg_4085	Cyanidin 3-glucoside	metab_6401	-	map00942;map01110	Anthocyanin biosynthesis;Biosynthesis of secondary metabolites	C08604	HMDB0030684	neg	-	-	Metabolism;Metabolism	Biosynthesis of other secondary metabolites;Global and overview maps	Phenylpropanoids and polyketides	Flavonoids	943.215	2M+FA-H	C21H21O11+	4.0266	0.029465	0	43.7	0.343401	47705-70-4	Flavonoid glycosides	6.5903	6.4245	6.4223	5.9063	5.89	5.9913	5.8036	6.1566	5.5642	3.748	4.8421	4.136	6.1474	6.1504	6.1267
neg_4088	Bellidifolin	metab_6404	-	-	-	C10053	HMDB0248933	neg	-	-	-	-	Organoheterocyclic compounds	Benzopyrans	319.046	M+FA-H	C14H10O6	4.0266	0.00979106	0	76.3	-0.885433	2798-25-6	1-benzopyrans	6.1054	6.3591	5.8944	5.4353	5.2931	5.4891	5.7958	5.963	5.7831	4.594	4.7553	4.5601	5.8992	5.9065	5.9067
neg_4089	1h,8h-Pyrano[3,4-c]pyran-1,8-dione	metab_6405	-	-	-	-	HMDB0244906	neg	-	-	-	-	Organoheterocyclic compounds	Pyrans	209.009	M+FA-H	C8H4O4	4.0266	0.0138568	0	35.2	-3.80432	-	Pyranones and derivatives	4.2636	4.5383	4.032	3.4839	3.4124	3.6942	3.9746	4.1221	3.8384	2.819	3.5049	2.8464	4.0846	4.0949	4.0952
neg_4098	Tectorigenin	metab_6415	-	-	-	C10534	LMPK12050385;HMDB0042024;MJDBOTE0000251	neg	-	-	-	-	Phenylpropanoids and polyketides	Isoflavonoids	299.056	M-H	C16H12O6	3.9946	0.00428522	92	0	-0.619207	548-77-6	Isoflav-2-enes	6.4735	6.2628	6.274	5.8421	5.8832	5.9093	5.8004	5.9422	5.6273	4.804	5.0404	4.8733	6.1056	6.1087	6.1089
neg_4113	Chlorambucil	metab_6433	-	-	-	C06900	HMDB0014436	neg	-	-	-	-	Organic nitrogen compounds	Organonitrogen compounds	338.052	M+Cl	C14H19Cl2NO2	3.9476	0.00666409	0	41.4	9.72374	305-03-3	Nitrogen mustard compounds	4.2898	4.2955	4.3225	5.1748	5.2572	5.1793	4.2698	4.2376	4.2443	5.1334	5.2598	5.219	4.7409	4.7351	4.7376
neg_413	Pratenol B	metab_6451	-	-	-	-	HMDB0040631	neg	-	-	-	-	Organoheterocyclic compounds	Benzopyrans	325.035	M-H2O-H, M+Na-2H	C15H12O7	5.9852	0.00600607	0	39.4	7.30358	147710-51-8	1-benzopyrans	5.4839	5.5232	5.4641	5.8514	5.9007	5.9091	5.5534	5.4611	5.5546	5.8366	5.8148	5.9553	5.635	5.637	5.6402
neg_4131	7-Galloylcatechin	metab_6453	-	-	-	-	HMDB0037947	neg	-	-	-	-	Phenylpropanoids and polyketides	Flavonoids	441.083	M-H	C22H18O10	3.8902	0.00361194	0	56.6	-0.164641	89702-01-2	Flavans	5.2037	5.3535	5.375	4.7338	4.7739	4.8952	5.2834	5.4332	5.4867	4.488	4.6372	4.5333	5.2161	5.2187	5.2189
neg_4142	4-Acetoxyphenol	metab_6465	-	map01100	Metabolic pathways	C13636	HMDB0060390	neg	-	-	Metabolism	Global and overview maps	Benzenoids	Phenol esters	151.039	M-H	C8H8O3	3.8519	0.0103804	58.8	0	-5.90972	-	Not Available	3.6211	3.964	3.9682	4.7503	4.7351	4.7542	4.1256	4.0634	4.1197	5.1433	5.0385	5.1684	4.4163	4.425	4.4186
neg_4174	Bisnoryangonin	metab_6498	-	-	-	C12085	HMDB0303165	neg	-	-	-	-	Benzenoids	Benzene and substituted derivatives	211.039	M-H2O-H	C13H10O4	3.7214	0.0244475	0	80.8	-2.94497	-	Styrenes	4.9456	4.7114	4.8145	4.1219	4.168	3.9643	4.5121	4.6857	4.0928	3.8998	3.8743	3.9273	4.5871	4.5892	4.6063
neg_4179	Aniracetam	metab_6503	-	-	-	C13355	HMDB0248441	neg	-	-	-	-	Benzenoids	Benzene and substituted derivatives	256.038	M+K-2H	C12H13NO3	3.7101	0.0177511	0	46.6	-2.49651	72432-10-1	Benzoic acids and derivatives	5.4898	5.3018	5.3539	4.8239	4.868	4.8358	5.1359	5.3278	4.7583	3.5671	4.2048	3.2054	5.2137	5.2016	5.216
neg_418	Hispiduloside	metab_6504	-	-	-	C17762	HMDB0302930	neg	-	-	-	-	Phenylpropanoids and polyketides	Flavonoids	483.093	M-H, M+Na-2H	C22H22O11	5.901	0.00348711	0	57.6	5.12916	-	Flavonoid glycosides	5.0449	5.1541	4.8423	5.5444	5.7581	5.5662	5.2482	5.0631	5.1801	5.4031	5.6965	5.6198	5.3884	5.3904	5.3874
neg_4180	4-Methylumbelliferyl acetate	metab_6505	-	-	-	C03837	HMDB0032989	neg	-	-	-	-	Phenylpropanoids and polyketides	Coumarins and derivatives	217.05	M-H	C12H10O4	3.7027	0.0342596	0	69.8	-2.82906	2747-05-09	Not Available	5.318	5.1237	5.2062	4.8103	4.8481	4.8199	4.949	5.1681	4.6677	3.6252	4.075	3.6531	5.0598	5.0431	5.0729
neg_4181	Vanilloyl glucose	metab_6506	-	-	-	C20470	HMDB0302470	neg	-	-	-	-	Phenylpropanoids and polyketides	Tannins	329.088	M-H	C14H18O9	3.7027	0.00340433	0	71.1	-0.780716	-	Hydrolyzable tannins	7.1692	6.9907	7.0753	6.6627	6.6971	6.6872	6.7961	6.9778	6.5283	6.0737	6.2863	6.1231	6.8937	6.8957	6.8965
neg_4184	2,3-Butanediol apiosylglucoside	metab_6509	-	-	-	-	HMDB0033063	neg	-	-	-	-	Organic oxygen compounds	Organooxygen compounds	421.114	M+K-2H	C15H28O11	3.6924	0.00487555	0	41.8	5.33285	-	Carbohydrates and carbohydrate conjugates	5.1039	4.9899	4.9039	4.09	4.0389	3.7429	4.5013	4.8354	4.0934	3.4033	3.2938	3.3829	4.6419	4.6439	4.6397
neg_4190	Aesculin	metab_6516	-	-	-	C09264	HMDB0030820	neg	-	-	-	-	Phenylpropanoids and polyketides	Coumarins and derivatives	339.072	M-H	C15H16O9	3.6777	0.00853295	0	60.8	-0.926498	531-75-9	Coumarin glycosides	5.5982	5.4984	5.5067	5.0693	5.1034	5.0589	5.1936	5.4149	4.9982	3.9374	4.5509	4.3426	5.3491	5.3553	5.3556
neg_4201	Cis-Coutaric acid	metab_6528	-	-	-	-	HMDB0034620	neg	-	-	-	-	Phenylpropanoids and polyketides	Cinnamic acids and derivatives	295.046	M-H	C13H12O8	3.6438	0.134134	0	37.2	-0.950471	67920-37-0	Hydroxycinnamic acids and derivatives	3.2769	3.0897	3.6238	4.7193	4.2605	4.4196	3.064	3.0319	3.2544	4.2177	4.5507	4.3722	3.7125	3.7158	3.8117
neg_4207	Asperuloside	metab_6534	-	map01110;map00902	Biosynthesis of secondary metabolites;Monoterpenoid biosynthesis	C09769	HMDB0248667	neg	-	-	Metabolism;Metabolism	Global and overview maps;Metabolism of terpenoids and polyketides	Organic oxygen compounds	Organooxygen compounds	395.098	M-H2O-H	C18H22O11	3.6089	0.00444247	0	60.6	-0.604923	14259-45-1	Carbohydrates and carbohydrate conjugates	3.312	3.3177	3.4386	5.2707	5.3154	5.2568	4.1811	4.2733	4.2706	5.3961	5.6222	5.4882	4.6935	4.6919	4.6957
neg_4219	Patuletin	metab_6546	-	-	-	C10118	LMPK12112986;HMDB0030802	neg	-	-	-	-	Phenylpropanoids and polyketides	Flavonoids	331.046	M-H	C16H12O8	3.5616	0.00745561	0	62	-0.551635	519-96-0	Flavones	4.3048	4.2572	4.195	5.1516	4.9733	5.3797	4.2583	4.3698	3.6726	4.8145	4.8407	4.7266	4.8812	4.8867	4.8869
neg_4236	2-(3,4-Dihydroxybenzoyloxy)-4,6-dihydroxybenzoate	metab_6565	-	-	-	C04524	HMDB0059651	neg	-	-	-	-	Phenylpropanoids and polyketides	Depsides and depsidones	287.02	M-H2O-H	C14H10O8	3.5049	0.0163818	0	56.4	-0.4228	-	Not Available	4.128	4.1337	4.1608	4.5937	4.8128	4.775	4.108	4.0759	4.0826	4.8118	5.1904	4.8229	4.1751	4.1884	4.1777
neg_4237	5-Caffeoylquinic acid	metab_6566	-	-	-	C17147	HMDB0240477	neg	-	-	-	-	Organic oxygen compounds	Organooxygen compounds	353.088	M-H	C16H18O9	3.4994	0.0362233	0	58.2	-0.516894	-	Alcohols and polyols	3.8495	3.8796	4.1216	5.061	5.1345	5.186	4.1638	4.3531	4.4738	4.5888	4.9837	4.6143	4.5281	4.5554	4.556
neg_429	3,4-Dihydroxyphenylglycol	metab_6624	-	map01100;map00350	Metabolic pathways;Tyrosine metabolism	C05576	HMDB0000318;PW_C000222	neg	-	-	Metabolism;Metabolism	Global and overview maps;Amino acid metabolism	Benzenoids	Phenols	151.039	M-H2O-H, M-H	C8H10O4	2.9897	0.00329615	71.8	0	-5.19412	3343-19-9;28822-73-3	Benzenediols	4.2999	4.4417	4.4655	4.9804	5.0719	5.013	4.366	4.3989	4.3236	4.9676	5.0004	5.0728	4.7268	4.7296	4.7276
neg_4295	Kojic acid	metab_6630	-	-	-	C14516	HMDB0032923;HMDB0258034	neg	-	-	-	-	Organoheterocyclic compounds	Pyrans	343.067	2M+Hac-H	C6H6O4	3.3255	0.0140357	0	50.6	-0.737863	501-30-4	Pyranones and derivatives	5.5173	5.2602	5.3309	4.2603	4.5074	4.5827	5.3871	5.5366	5.1903	4.5569	4.7094	4.0333	5.1279	5.1384	5.1386
neg_4301	Isoquercitroside	metab_6638	-	map01100;map01110;map00944	Metabolic pathways;Biosynthesis of secondary metabolites;Flavone and flavonol biosynthesis	C05623	HMDB0247252;HMDB0037362;HMDB0253683	neg	-	-	Metabolism;Metabolism;Metabolism	Global and overview maps;Global and overview maps;Biosynthesis of other secondary metabolites	Phenylpropanoids and polyketides	Flavonoids	463.088	M-H	C21H20O12	3.3196	0.00494696	0	70.4	-0.0188515	482-35-9	Flavonoid glycosides	6.4256	6.4475	6.4697	7.0892	7.1062	7.128	6.5531	6.6242	6.3764	6.7971	7.0045	6.7733	6.701	6.7053	6.7033
neg_4304	6''-O-Acetylholocalin	metab_6641	-	-	-	-	HMDB0036331	neg	-	-	-	-	Organic oxygen compounds	Organooxygen compounds	352.104	M-H	C16H19NO8	3.3132	0.00555641	0	52	-0.615229	-	Carbohydrates and carbohydrate conjugates	4.8281	4.8284	4.6566	4.2261	4.4956	4.4478	3.705	3.533	3.9294	3.1433	3.1178	3.1707	4.5127	4.5175	4.515
neg_4320	P-Toluenesulfonic Acid	metab_6658	-	map01100	Metabolic pathways	C06677	HMDB0059933	neg	-	-	Metabolism	Global and overview maps	Benzenoids	Benzene and substituted derivatives	171.011	M-H	C7H8O3S	3.2958	0.0295253	55.2	0	-4.69615	104-15-4	Benzenesulfonic acids and derivatives	4.4021	4.5036	4.4066	4.7574	4.8441	5.0666	4.6549	4.5927	4.6049	4.7513	4.7694	4.8046	4.6439	4.6663	4.6664
neg_4341	Irisxanthone	metab_6681	-	-	-	C10067	-	neg	-	-	-	-	-	-	435.093	M-H	C20H20O11	3.2702	0.0081297	57.1	0	-0.444991	51419-56-8	-	5.117	4.9723	5.0663	4.0919	4.1029	4.2358	5.3684	5.3288	5.1019	3.9634	3.7848	3.6606	4.9835	4.9857	4.9904
neg_4373	Maclurin	metab_6716	-	-	-	C09951	HMDB0032644	neg	-	-	-	-	Benzenoids	Benzene and substituted derivatives	583.109	2M+Hac-H	C13H10O6	3.1842	0.0586277	0	40.2	0.282823	519-34-6	Benzophenones	5.4324	5.3479	5.1349	4.1829	4.5858	4.4474	4.5002	5.078	4.7191	4.1818	4.1563	4.2093	4.9425	4.9446	4.8987
neg_4374	Aurin	metab_6717	-	-	-	C14213	HMDB0248730	neg	-	-	-	-	Benzenoids	Benzene and substituted derivatives	311.071	M+Na-2H	C19H14O3	3.1842	0.00601902	0	36.4	5.90034	603-45-2	Diphenylmethanes	2.3686	2.5282	2.1723	5.2154	5.2503	5.147	2.7182	2.8922	2.9276	5.21	5.3264	5.162	4.6602	4.6622	4.6654
neg_4377	Rosuvastatin 5 S-lactone	metab_6720	-	-	-	-	HMDB0060941	neg	-	-	-	-	Organoheterocyclic compounds	Diazines	500.105	M+K-2H	C22H26FN3O5S	3.1793	0.0131138	0	48.4	-3.43373	-	Pyrimidines and pyrimidine derivatives	5.3633	5.2956	5.4711	4.9291	4.7526	4.8514	4.5472	4.9367	4.8901	3.3742	3.7448	3.4017	5.016	5.0258	5.026
neg_4394	Dihydrofolic acid	metab_6739	-	map01100;map00670;map00790;map01240	Metabolic pathways;One carbon pool by folate;Folate biosynthesis;Biosynthesis of cofactors	C00415	PW_C000831;HMDB0001056	neg	-	-	Metabolism;Metabolism;Metabolism;Metabolism	Global and overview maps;Metabolism of cofactors and vitamins;Metabolism of cofactors and vitamins;Global and overview maps	Organic acids and derivatives	Carboxylic acids and derivatives	488.154	M+FA-H	C19H21N7O6	3.1398	0.0582475	0	44.9	-0.0283783	4033-27-6	Amino acids, peptides, and analogues	4.8377	4.7731	4.9276	4.2017	4.221	4.2651	4.092	4.0598	4.0665	4.2006	4.1751	4.2281	4.1592	4.2034	4.1613
neg_4401	Furaneol (keto form)	metab_6748	-	-	-	-	HMDB0304357	neg	-	-	-	-	Organoheterocyclic compounds	Dihydrofurans	108.021	M-H2O-H	C6H7O3-	3.1398	0.00970266	0	43.6	-7.75475	-	Furanones	4.4704	4.4254	4.4998	5.0755	5.166	5.2057	4.2324	4.4329	4.1669	5.2022	5.3003	5.2433	4.8437	4.8457	4.8517
neg_4407	Letaxaban	metab_6754	-	-	-	-	HMDB0254023	neg	-	-	-	-	Benzenoids	Naphthalenes	524.126	M+FA-H	C22H26ClN3O5S	3.1182	0.0472677	0	86.8	-1.70362	-	Chloronaphthalenes	4.932	4.7819	4.7487	4.3005	4.3645	4.5784	4.9664	5.2271	4.7633	5.0484	4.7016	4.0635	4.8687	4.8718	4.8343
neg_4408	Racemethionine	metab_6755	-	-	-	C01733	HMDB0033951	neg	-	-	-	-	Organic acids and derivatives	Carboxylic acids and derivatives	343.103	2M+FA-H	C5H11NO2S	3.1182	0.0059057	0	32.9	9.87592	59-51-8	Amino acids, peptides, and analogues	3.9106	3.9299	4.1751	6.0822	6.1621	6.1942	3.5538	3.7528	3.6119	5.8144	5.9935	5.8178	5.547	5.5522	5.5493
neg_4429	Deoxyloganic acid	metab_6777	-	-	-	C11647	HMDB0037028	neg	-	-	-	-	Lipids and lipid-like molecules	Prenol lipids	405.141	M+FA-H	C16H24O9	3.0807	0.0202187	0	45.7	3.11398	92842-56-3	Terpene glycosides	4.5861	4.6317	4.5158	5.8547	5.7908	5.8478	4.333	4.5018	4.4643	5.8676	5.7911	5.8204	5.3721	5.3873	5.3875
neg_4436	4-Hydroxyphenylacetic acid sulfate	metab_6785	-	-	-	-	HMDB0304906	neg	-	-	-	-	Benzenoids	Phenols	230.996	M-H	C8H8O6S	3.0693	0.0142621	0	44	-1.91177	-	1-hydroxy-2-unsubstituted benzenoids	3.2737	3.2412	3.9541	4.7299	4.2236	4.2459	2.6108	2.9379	3.6319	4.8662	4.7457	4.899	4.249	4.2586	4.2607
neg_4444	DIBOA trihexose	metab_6794	-	map01110;map00944	Biosynthesis of secondary metabolites;Flavone and flavonol biosynthesis	C11620	HMDB0304558	neg	-	-	Metabolism;Metabolism	Global and overview maps;Biosynthesis of other secondary metabolites	Phenylpropanoids and polyketides	Flavonoids	751.153	2M+Hac-H	C17H14O8	3.046	0.0141482	0	33.1	1.43136	-	Flavones	5.7682	5.8588	5.7521	6.4835	6.6004	6.5705	5.8322	6.0371	5.4348	5.3901	5.7177	5.3743	5.9921	5.9816	5.9813
neg_4495	Methotrexate	metab_6850	-	-	-	C01937	PW_C009057;HMDB0248287;HMDB0014703;MJDBOTE0000857	neg	-	-	-	-	Organoheterocyclic compounds	Triazines	475.146	M+Na-2H	C20H22N8O5	2.9038	0.0115968	0	30.6	-0.894699	1959-05-02	1,3,5-triazines	4.4967	4.5898	4.8137	5.6476	5.6986	5.7752	3.9584	4.5364	4.501	5.1069	5.2128	4.9213	5.0657	5.057	5.0571
neg_4524	Fenamiphos	metab_6883	-	-	-	C18659	HMDB0031787	neg	-	-	-	-	Benzenoids	Benzene and substituted derivatives	605.206	2M-H	C13H22NO3PS	2.816	0.0390114	0	44.9	1.97238	22224-92-6	Phenoxy compounds	4.8496	5.1381	4.904	4.6164	4.2968	4.0536	5.668	5.5807	5.768	5.3257	5.1327	5.2444	5.2465	5.2484	5.2765
neg_4557	Tyrosyl-Glutamate	metab_6919	-	-	-	-	HMDB0029104	neg	-	-	-	-	Organic acids and derivatives	Carboxylic acids and derivatives	331.093	M+Na-2H	C14H18N2O6	2.8082	0.00905931	0	46.7	6.42735	-	Amino acids, peptides, and analogues	4.8252	4.8651	4.953	5.577	5.6581	5.6625	4.2048	4.257	4.5545	5.3818	5.5381	5.4041	5.1108	5.1175	5.1178
neg_4560	Arborinine	metab_6923	-	-	-	C10643	HMDB0030177	neg	-	-	-	-	Organoheterocyclic compounds	Quinolines and derivatives	306.076	M+Na-2H	C16H15NO4	2.8082	0.0257331	0	33.8	5.24291	5489-57-6	Benzoquinolines	3.6528	3.9423	3.7329	5.0725	5.0761	5.1684	2.743	3.271	3.2661	4.7605	4.9216	4.7691	4.5052	4.5074	4.5254
neg_4562	(2R,3S)-2,3-dimethylmalate	metab_6925	-	map00760	Nicotinate and nicotinamide metabolism	C03652	HMDB0303969	neg	-	-	Metabolism	Metabolism of cofactors and vitamins	Lipids and lipid-like molecules	Fatty Acyls	205.035	M+FA-H	C6H8O5-2	2.8082	0.0176242	0	30.6	-3.9196	-	Fatty acids and conjugates	4.9668	5.0147	5.1462	5.3704	5.4624	5.4868	4.611	4.6551	4.5684	5.0284	5.0957	5.0976	5.0589	5.0722	5.0723
neg_4566	Ethyl maltol	metab_6929	-	-	-	C20362	HMDB0031735	neg	-	-	-	-	Organoheterocyclic compounds	Pyrans	139.039	M-H	C7H8O3	2.8082	0.0119459	0	39.5	-6.7287	4940-11-08	Pyranones and derivatives	4.3224	4.2706	4.2598	4.9367	4.9988	5.009	4.1838	4.0819	4.0365	4.8911	4.9872	4.9939	4.5931	4.595	4.6028
neg_463	Limocitrin	metab_7000	-	-	-	-	HMDB0029516;LMPK12113241	neg	-	-	-	-	Phenylpropanoids and polyketides	Flavonoids	327.051	M-H2O-H, M-H	C17H14O8	3.3329	0.0133196	0	35.2	-0.673083	489-33-8	Flavones	4.7104	4.8901	5.0057	3.6068	3.6261	3.6702	3.4971	4.142	4.1652	3.6057	3.5802	3.6332	4.4064	4.3976	4.4086
neg_4632	3',5'-Cyclic GMP	metab_7003	-	map01100;map00230	Metabolic pathways;Purine metabolism	C00942	HMDB0001314	neg	Nucleic acids	Cyclic nucleotides	Metabolism;Metabolism	Global and overview maps;Nucleotide metabolism	Nucleosides, nucleotides, and analogues	Purine nucleotides	344.04	M-H	C10H12N5O7P	2.4411	0.0412589	88	0	-0.726376	7665-99-8	Cyclic purine nucleotides	4.7635	4.7692	4.7962	5.3897	5.5617	5.6105	4.7435	4.7113	4.718	4.9027	5.2346	4.9262	4.8432	4.8452	4.8128
neg_4641	4-Acetyl-2(3H)-benzoxazolone	metab_7013	-	-	-	-	HMDB0040612	neg	-	-	-	-	Organoheterocyclic compounds	Benzoxazoles	222.04	M+FA-H	C9H7NO3	2.1353	0.00342184	0	37.6	-3.15403	70735-79-4	Benzoxazolones	6.211	6.0567	6.2289	6.4965	6.5826	6.7648	6.0093	5.9572	5.777	6.4892	6.359	6.6517	6.269	6.2718	6.2713
neg_4662	Mitomycin A	metab_7035	-	-	-	C21161	HMDB0254761	neg	-	-	-	-	Organoheterocyclic compounds	Indoles and derivatives	384.094	M+Cl	C16H19N3O6	1.6636	0.000383859	0	36	-9.35313	-	Indolequinones	5.0662	4.9192	5.1118	5.314	5.3758	5.5419	5.3913	5.282	5.199	5.5595	5.4421	5.7596	5.3112	5.3109	5.3111
neg_4685	2-Furoic Acid	metab_7057	-	map01100	Metabolic pathways	C01546	HMDB0000617;MJDBOTE0000456	neg	-	-	Metabolism	Global and overview maps	Organoheterocyclic compounds	Furans	111.008	M-H	C5H4O3	1.4143	0.00849208	64.3	0	-8.96474	88-14-2	Furoic acid and derivatives	6.3064	6.4548	6.411	6.7938	6.8137	6.7817	6.2228	6.1728	5.9035	6.6512	6.6136	6.6918	6.4642	6.4693	6.4713
neg_4687	Citric Acid	metab_7059	-	map01100;map00630;map01110;map01240;map01210;map01200;map01230;map00250;map00020	Metabolic pathways;Glyoxylate and dicarboxylate metabolism;Biosynthesis of secondary metabolites;Biosynthesis of cofactors;2-Oxocarboxylic acid metabolism;Carbon metabolism;Biosynthesis of amino acids;Alanine, aspartate and glutamate metabolism;Citrate cycle (TCA cycle)	C00158	HMDB0000094;PW_C000063;MJDBNL00000139	neg	Organic acids	Carboxylic acids	Metabolism;Metabolism;Metabolism;Metabolism;Metabolism;Metabolism;Metabolism;Metabolism;Metabolism	Global and overview maps;Carbohydrate metabolism;Global and overview maps;Global and overview maps;Global and overview maps;Global and overview maps;Global and overview maps;Amino acid metabolism;Carbohydrate metabolism	Organic acids and derivatives	Carboxylic acids and derivatives	191.019	M-H	C6H8O7	1.3987	0.0213095	91.9	0	-3.99709	77-92-9	Tricarboxylic acids and derivatives	7.736	7.8874	7.8274	8.1713	8.1959	8.1513	7.6761	7.6267	7.3509	8.0765	8.0329	8.1117	7.8859	7.9019	7.9021
neg_4698	Guanosine-5'-monophosphate	metab_7070	-	map01100;map01232;map00230	Metabolic pathways;Nucleotide metabolism;Purine metabolism	C00144	HMDB0001397	neg	Nucleic acids	Nucleotides	Metabolism;Metabolism;Metabolism	Global and overview maps;Global and overview maps;Nucleotide metabolism	Nucleosides, nucleotides, and analogues	Purine nucleotides	362.051	M-H	C10H14N5O8P	1.3103	0.156757	66.1	0	-0.526581	85-32-5	Purine ribonucleotides	4.6892	4.6949	4.7219	5.8386	6.1028	6.0599	4.6692	4.637	4.6437	5.1309	5.5554	4.8115	4.7362	4.8601	4.861
neg_4707	Uridine-5'-Monophosphate	metab_7079	-	map00240;map01100;map01232;map01240	Pyrimidine metabolism;Metabolic pathways;Nucleotide metabolism;Biosynthesis of cofactors	C00105	HMDB0000288;MJDBOTE0000717	neg	Nucleic acids	Nucleotides	Metabolism;Metabolism;Metabolism;Metabolism	Nucleotide metabolism;Global and overview maps;Global and overview maps;Global and overview maps	Nucleosides, nucleotides, and analogues	Pyrimidine nucleotides	323.028	M-H	C9H13N2O9P	1.2011	0.107144	74.4	0	-0.731145	58-97-9	Pyrimidine ribonucleotides	3.7093	3.5437	4.0973	5.7246	5.9422	5.9242	3.4133	3.3811	3.3878	5.1071	5.5496	5.1083	4.8253	4.9108	4.8415
neg_4722	4'-Thiothymidine	metab_7095	-	-	-	-	HMDB0246637	neg	-	-	-	-	Nucleosides, nucleotides, and analogues	Nucleoside and nucleotide analogues	515.125	2M-H	C10H14N2O4S	1.1231	0.053615	0	34.7	-4.69003	-	Thionucleosides	5.242	4.7079	5.2365	5.6573	5.826	5.6648	3.7654	3.7332	3.7399	3.874	4.7411	3.9083	5.0441	5.0904	5.0741
neg_4724	(2S)-2-[[5-[2-[(6S)-2-Amino-4-oxo-1,6,7,8-tetrahydropyrimido[5,4-b][1,4]thiazin-6-yl]ethyl]thiophene-2-carbonyl]amino]pentanedioic acid	metab_7097	-	-	-	-	HMDB0248055	neg	-	-	-	-	Organic acids and derivatives	Carboxylic acids and derivatives	488.066	M+Na-2H	C18H21N5O6S2	1.1153	0.0163079	0	34	-4.27195	-	Amino acids, peptides, and analogues	5.6996	5.6186	5.4714	6.046	6.1747	6.0508	5.7654	5.6747	5.6006	6.1363	6.0588	6.1728	5.844	5.8309	5.8423
neg_4727	Fumaric acid	metab_7099	-	map01100;map00220;map01110;map00350;map00650;map01200;map00620;map00760;map00250;map00360;map00020;map00190	Metabolic pathways;Arginine biosynthesis;Biosynthesis of secondary metabolites;Tyrosine metabolism;Butanoate metabolism;Carbon metabolism;Pyruvate metabolism;Nicotinate and nicotinamide metabolism;Alanine, aspartate and glutamate metabolism;Phenylalanine metabolism;Citrate cycle (TCA cycle);Oxidative phosphorylation	C00122	HMDB0000134;PW_C000088	neg	-	-	Metabolism;Metabolism;Metabolism;Metabolism;Metabolism;Metabolism;Metabolism;Metabolism;Metabolism;Metabolism;Metabolism;Metabolism	Global and overview maps;Amino acid metabolism;Global and overview maps;Amino acid metabolism;Carbohydrate metabolism;Global and overview maps;Carbohydrate metabolism;Metabolism of cofactors and vitamins;Amino acid metabolism;Amino acid metabolism;Carbohydrate metabolism;Energy metabolism	Organic acids and derivatives	Carboxylic acids and derivatives	115.003	M-H	C4H4O4	1.1076	0.068181	53.6	0	-8.64057	110-17-8	Dicarboxylic acids and derivatives	4.1482	4.0306	4.4734	4.8583	4.8398	4.8253	3.8076	3.8629	3.6189	4.5574	4.4667	4.7182	4.2468	4.2546	4.1989
neg_4730	B-D-Glucuronopyranosyl-(1->3)-a-D-galacturonopyranosyl-(1->2)-L-rhamnose	metab_7103	-	-	-	-	HMDB0039728	neg	-	-	-	-	Organic oxygen compounds	Organooxygen compounds	553.081	M+K-2H	C18H28O17	1.0841	0.154418	0	42.7	0.0380524	-	Carbohydrates and carbohydrate conjugates	5.4653	5.0933	5.3363	5.9342	6.1222	6.0513	3.9914	3.9593	3.966	4.1001	4.0745	4.1275	5.2824	5.2836	5.1606
neg_4737	Erythro-4-hydroxy-L-glutamate(1-)	metab_7109	-	-	-	C03079	HMDB0062752	neg	-	-	-	-	Organic acids and derivatives	Carboxylic acids and derivatives	144.029	M-H2O-H	C5H9NO5	1.0529	0.0332103	0	41.2	-5.67856	-	Amino acids, peptides, and analogues	5.0174	4.9718	5.326	5.5247	5.4787	5.7684	4.3988	4.5068	4.134	5.3397	5.3136	5.3337	5.1262	5.1283	5.152
neg_4745	3-Oxoadipic acid	metab_7115	-	map01100	Metabolic pathways	C00846	HMDB0000398	neg	-	-	Metabolism	Global and overview maps	Organic acids and derivatives	Keto acids and derivatives	205.035	M+FA-H	C6H8O5	0.9905	0.0375027	0	40.3	-4.13042	689-31-6	Medium-chain keto acids and derivatives	3.8932	4.0633	4.3941	5.2948	5.2368	5.3307	3.5614	3.0607	3.0673	5.3429	5.4167	5.4179	4.7075	4.7363	4.7358
neg_4759	D-Galactaric acid	metab_7127	-	map01100;map00053	Metabolic pathways;Ascorbate and aldarate metabolism	C00879	HMDB0000639	neg	-	-	Metabolism;Metabolism	Global and overview maps;Carbohydrate metabolism	Organic oxygen compounds	Organooxygen compounds	209.03	M-H	C6H10O8	0.9359	0.0511406	85.1	0	-3.03741	526-99-8	Carbohydrates and carbohydrate conjugates	3.3435	3.3493	4.0187	5.2273	5.3975	5.7531	3.3236	3.2914	3.2981	5.0638	5.2974	5.0267	4.8104	4.7717	4.7732
neg_4766	6-[[2-[[2-Amino-4-(methylamino)-4-oxobutanoyl]amino]-2-(4-hydroxyphenyl)acetyl]amino]-3,3-dimethyl-7-oxo-4-thia-1-azabicyclo[3.2.0]heptane-2-carboxylic acid	metab_7132	-	-	-	-	HMDB0248670	neg	-	-	-	-	Organic acids and derivatives	Carboxylic acids and derivatives	474.147	M-H2O-H	C21H27N5O7S	0.9126	0.0234182	0	53.3	3.16226	-	Amino acids, peptides, and analogues	5.717	5.6652	5.7464	6.348	6.2033	6.1105	5.6337	5.6901	5.7461	6.2427	6.2625	6.1592	5.9667	5.9493	5.9492
neg_4769	Raffinose	metab_7134	-	map01100;map02010;map00052	Metabolic pathways;ABC transporters;Galactose metabolism	C00492	HMDB0003213;PW_C001805;MJDBOTE0001734	neg	-	-	Metabolism;Environmental Information Processing;Metabolism	Global and overview maps;Membrane transport;Carbohydrate metabolism	Organic oxygen compounds	Organooxygen compounds	539.138	M+Cl	C18H32O16	0.9048	0.00451519	96.9	0	-0.0628465	512-69-6	Carbohydrates and carbohydrate conjugates	7.4265	7.5871	7.5324	7.0241	7.1701	7.0486	7.7825	7.5952	7.6728	7.4225	7.5619	7.1745	7.5265	7.523	7.5232
neg_4785	Trehalose 6-Phosphate	metab_7150	-	map01100;map00500;map01110	Metabolic pathways;Starch and sucrose metabolism;Biosynthesis of secondary metabolites	C00689	HMDB0001124	neg	-	-	Metabolism;Metabolism;Metabolism	Global and overview maps;Carbohydrate metabolism;Global and overview maps	Organic oxygen compounds	Organooxygen compounds	421.075	M-H	C12H23O14P	0.8736	0.0223213	82.8	0	-0.125447	4484-88-2	Carbohydrates and carbohydrate conjugates	5.7213	5.6788	5.6789	6.105	6.163	6.2264	5.3271	5.5438	5.4548	6.239	6.2775	6.12	5.847	5.866	5.8538
neg_4788	Garciduol C	metab_7153	-	-	-	-	HMDB0030279	neg	-	-	-	-	Organoheterocyclic compounds	Indoles and derivatives	523.047	M+K-2H	C27H18O9	0.8658	0.0471194	0	52.9	7.42903	182127-82-8	Pyrroloindoles	4.7369	4.3291	4.8498	5.4604	5.5223	5.783	4.346	4.1938	4.3151	5.4384	5.3458	5.6232	4.8834	4.8484	4.8484
neg_550	3,4-dihydroxyphenylacetic Acid	metab_7513	-	map01100;map00350	Metabolic pathways;Tyrosine metabolism	C01161	HMDB0001336;MJDBSJD0000081	neg	-	-	Metabolism;Metabolism	Global and overview maps;Amino acid metabolism	Benzenoids	Phenols	167.034	M-H, M+Cl	C8H8O4	4.6836	0.00917624	73.9	0	-4.92296	102-32-9	Benzenediols	6.3192	6.5405	6.2333	6.8577	6.7884	6.9888	6.4363	6.4102	6.2759	6.6727	6.5152	6.59	6.5199	6.5244	6.5278
neg_58	Ginnalin B	metab_7545	-	-	-	-	HMDB0252723	neg	-	-	-	-	Benzenoids	Benzene and substituted derivatives	315.072	M-H, M+Cl, M+FA-H	C13H16O9	3.484	0.0195143	0	56.1	-0.371249	-	Benzoic acids and derivatives	5.915	6.2023	5.7922	6.272	6.4115	6.4646	5.3936	5.5875	5.7167	6.2661	6.1507	6.1954	6.0489	6.0635	6.0638
neg_580	Xanthotoxol glucoside	metab_7546	-	-	-	-	HMDB0038626	neg	-	-	-	-	Phenylpropanoids and polyketides	Coumarins and derivatives	363.072	M-H2O-H, M-H	C17H16O9	5.1958	0.0137936	0	61.2	-0.286742	-	Coumarin glycosides	5.3238	5.4729	5.3461	3.9503	3.9911	4.3581	5.851	5.8606	5.6677	4.6476	4.0108	4.64	5.4173	5.4276	5.4279
neg_6	2-Feruloyl-1-sinapoylgentiobiose	metab_7567	-	-	-	-	HMDB0030334	neg	-	-	-	-	Phenylpropanoids and polyketides	Cinnamic acids and derivatives	723.215	M-H, M+Cl, M+FA-H, M+Na-2H	C33H40O18	5.0043	0.00878237	0	74	1.07428	-	Hydroxycinnamic acids and derivatives	6.8176	6.8708	6.8339	6.5098	5.7434	6.2065	7.0159	6.9429	6.8894	6.5022	6.4958	6.5525	6.7728	6.7663	6.7662
neg_7	Homoplantaginin	metab_7678	-	-	-	C17762	-	neg	-	-	-	-	-	-	461.109	M+Cl, M+FA-H, 2M-H, M-H	C22H22O11	3.9868	0.00135551	61.2	0	-0.130939	-	-	7.7117	7.4963	7.5077	7.0697	7.1233	7.1451	7.0244	7.1606	6.8635	6.1757	6.3751	6.2527	7.3403	7.3391	7.3394
neg_748	Ambazone	metab_7732	-	-	-	-	HMDB0248279	neg	-	-	-	-	Benzenoids	Benzene and substituted derivatives	258.056	M+Na-2H	C8H11N7S	0.858	0.0175327	0	72.1	7.6836	-	Phenylhydrazines	4.9685	5.1149	5.2329	4.6196	4.4729	4.8687	4.8494	4.6776	4.4696	4.3472	4.2384	4.4235	4.7787	4.7884	4.7938
neg_802	D-Xylono-1,5-lactone	metab_7785	-	map01100;map00040	Metabolic pathways;Pentose and glucuronate interconversions	C02266	HMDB0011676	neg	-	-	Metabolism;Metabolism	Global and overview maps;Carbohydrate metabolism	Organoheterocyclic compounds	Lactones	295.067	2M-H	C5H8O5	1.1622	0.0274118	0	37.7	-0.786431	-	Delta valerolactones	4.0667	4.0724	4.5396	5.463	5.1885	5.2427	4.0467	4.0145	4.0212	5.513	5.1244	5.2248	4.4107	4.4338	4.4279
neg_814	Adenosine 5'-Monophosphate	metab_7797	-	map01100;map01110;map00230;map01240;map00908;map01232	Metabolic pathways;Biosynthesis of secondary metabolites;Purine metabolism;Biosynthesis of cofactors;Zeatin biosynthesis;Nucleotide metabolism	C00020	HMDB0000045;MJDBOTE0000497	neg	Nucleic acids	Nucleotides	Metabolism;Metabolism;Metabolism;Metabolism;Metabolism;Metabolism	Global and overview maps;Global and overview maps;Nucleotide metabolism;Global and overview maps;Metabolism of terpenoids and polyketides;Global and overview maps	Nucleosides, nucleotides, and analogues	Purine nucleotides	346.055	M-H	C10H14N5O7P	1.2636	0.0476703	66.9	0	-1.35649	61-19-8	Purine ribonucleotides	4.1526	3.8398	3.7683	4.6067	5.16	4.9432	3.7156	4.0088	3.6901	4.6864	5.024	4.7313	4.5096	4.4773	4.4717
neg_815	4-Aminophenylmannoside	metab_7798	-	-	-	-	HMDB0246178	neg	-	-	-	-	Organic oxygen compounds	Organooxygen compounds	306.076	M+Cl	C12H17NO6	1.2791	0.0233988	0	30.9	5.03464	-	Carbohydrates and carbohydrate conjugates	4.9018	4.9076	4.9346	5.6839	5.9558	5.715	4.8819	4.8497	4.8564	5.6243	5.9939	5.7802	5.1773	5.1608	5.1795
neg_822	Citramalic Acid	metab_7805	-	-	-	C00815	HMDB0000426	neg	-	-	-	-	Lipids and lipid-like molecules	Fatty Acyls	147.029	M-H	C5H8O5	1.3327	0.0310363	83.9	0	-6.23625	2306-22-1;597-44-4	Fatty acids and conjugates	4.3749	4.4519	4.6669	4.8943	4.8574	4.9247	4.2307	4.2433	4.1961	4.7557	4.6472	4.8399	4.5466	4.5701	4.5702
neg_829	Phosphohydroxypyruvic acid	metab_7811	-	map01100;map01110;map00270;map01200;map01230;map00260	Metabolic pathways;Biosynthesis of secondary metabolites;Cysteine and methionine metabolism;Carbon metabolism;Biosynthesis of amino acids;Glycine, serine and threonine metabolism	C03232	HMDB0304153;PW_C000810;HMDB0001024	neg	-	-	Metabolism;Metabolism;Metabolism;Metabolism;Metabolism;Metabolism	Global and overview maps;Global and overview maps;Amino acid metabolism;Global and overview maps;Global and overview maps;Amino acid metabolism	Organic oxygen compounds	Organooxygen compounds	228.975	M+FA-H	C3H5O7P	1.3924	0.0209863	0	39.9	-1.91218	3913-50-6	Carbonyl compounds	5.0365	5.1472	5.1934	5.4171	5.5567	5.4995	4.4725	4.2521	3.0651	4.978	4.9468	5.0983	4.9693	4.984	4.9862
neg_839	L-4-Hydroxyglutamate semialdehyde	metab_7821	-	map01100;map00330	Metabolic pathways;Arginine and proline metabolism	C05938	PW_C002808;HMDB0006556	neg	-	-	Metabolism;Metabolism	Global and overview maps;Amino acid metabolism	Organic acids and derivatives	Carboxylic acids and derivatives	128.034	M-H2O-H	C5H9NO4	1.5149	0.0131409	0	44.7	-6.54569	-	Amino acids, peptides, and analogues	5.9492	6.0892	6.1998	6.5844	6.5603	6.5988	5.8566	5.8501	5.8828	6.5117	6.4495	6.4778	6.2182	6.228	6.2282
neg_845	Trans-Aconitic Acid	metab_7827	-	map01100;map00660	Metabolic pathways;C5-Branched dibasic acid metabolism	C02341	HMDB0000958;MJDBOTE0001106	neg	Organic acids	Carboxylic acids	Metabolism;Metabolism	Global and overview maps;Carbohydrate metabolism	Organic acids and derivatives	Carboxylic acids and derivatives	173.008	M-H	C6H6O6	1.5813	0.0104395	80	0	-4.60059	4023-65-8	Tricarboxylic acids and derivatives	6.3968	6.4861	6.7323	7.0978	7.13	7.1166	6.053	5.8961	5.716	6.8141	6.8888	6.9778	6.6641	6.6719	6.6721
neg_849	N-Acetyl-L-Glutamic Acid	metab_7831	-	map01100;map01210;map00220;map01110;map01230	Metabolic pathways;2-Oxocarboxylic acid metabolism;Arginine biosynthesis;Biosynthesis of secondary metabolites;Biosynthesis of amino acids	C00624	HMDB0001138;MJDBOTE0000638	neg	-	-	Metabolism;Metabolism;Metabolism;Metabolism;Metabolism	Global and overview maps;Global and overview maps;Amino acid metabolism;Global and overview maps;Global and overview maps	Organic acids and derivatives	Carboxylic acids and derivatives	188.056	M-H	C7H11NO5	1.6572	0.00875692	59.8	0	-3.67656	1188-37-0	Amino acids, peptides, and analogues	6.0163	5.8613	5.9162	6.2471	6.245	6.3666	5.6603	5.5901	5.4818	6.1171	6.0579	6.4955	5.9945	6.0001	6.0018
neg_851	Maleic Acid	metab_7834	-	map01100;map00650;map00350;map00760	Metabolic pathways;Butanoate metabolism;Tyrosine metabolism;Nicotinate and nicotinamide metabolism	C01384	HMDB0000176;HMDB0303644;MJDBOTE0000465	neg	-	-	Metabolism;Metabolism;Metabolism;Metabolism	Global and overview maps;Carbohydrate metabolism;Amino acid metabolism;Metabolism of cofactors and vitamins	Organic acids and derivatives	Carboxylic acids and derivatives	115.003	M-H	C4H4O4	1.67	0.0076565	80.6	0	-8.56493	110-16-7	Dicarboxylic acids and derivatives	5.5645	5.4295	5.7152	6.0027	6.2618	6.1985	5.1356	5.0488	4.9395	5.7339	5.678	5.8842	5.6603	5.666	5.6662
neg_856	Oxidized Glutathione	metab_7838	-	map01100;map00480;map01240	Metabolic pathways;Glutathione metabolism;Biosynthesis of cofactors	C00127	HMDB0003337;HMDB0011691;PW_C001847;MJDBOTE0000407	neg	-	-	Metabolism;Metabolism;Metabolism	Global and overview maps;Metabolism of other amino acids;Global and overview maps	Organic acids and derivatives	Carboxylic acids and derivatives	611.145	M-H	C20H32N6O12S2	1.7059	0.00850554	82.1	0	0.272902	15718-51-1;27025-41-8	Amino acids, peptides, and analogues	4.0761	3.9181	4.0284	5.7539	5.8641	5.9454	3.4972	3.4651	3.4865	5.8024	5.8944	5.5764	5.306	5.3078	5.3007
neg_858	6-Oxopiperidine-2-carboxylic acid	metab_7840	-	-	-	-	HMDB0061705	neg	-	-	-	-	Organic acids and derivatives	Carboxylic acids and derivatives	142.05	M-H	C6H9NO3	1.7241	0.000408274	0	46.3	-6.44708	-	Amino acids, peptides, and analogues	4.4881	4.6801	4.5509	5.0363	5.2011	5.2093	4.247	4.2033	4.2182	5.0557	4.9991	4.9791	4.7536	4.7533	4.7536
neg_870	2,4-Dihydroxy-2H-1,4-benzoxazin-3(4H)-one	metab_7853	-	map00402;map01100;map01110;map00999	Benzoxazinoid biosynthesis;Metabolic pathways;Biosynthesis of secondary metabolites;Biosynthesis of various plant secondary metabolites	C15770	HMDB0033733	neg	-	-	Metabolism;Metabolism;Metabolism;Metabolism	Biosynthesis of other secondary metabolites;Global and overview maps;Global and overview maps;Biosynthesis of other secondary metabolites	Organoheterocyclic compounds	Benzoxazines	162.019	M-H2O-H	C8H7NO4	2.151	0.0131208	0	30.7	-4.75124	17359-54-5	Benzoxazinones	5.1526	5.0372	5.1314	5.3732	5.4397	5.6318	5.1652	5.0805	4.9957	5.4069	5.2778	5.5789	5.1981	5.208	5.208
neg_904	L-quinate	metab_7891	-	map01100;map00400	Metabolic pathways;Phenylalanine, tyrosine and tryptophan biosynthesis	C00296	HMDB0304404	neg	-	-	Metabolism;Metabolism	Global and overview maps;Amino acid metabolism	Not Available	Not Available	441.125	2M+Hac-H	C7H11O6-	2.7161	0.0406874	0	78.2	-0.381501	77-95-2	Not Available	4.633	4.8049	4.8248	4.4995	4.1641	4.3417	5.009	4.7548	4.7904	4.5723	4.7392	4.6504	4.7668	4.7373	4.7696
neg_907	Glucaric acid	metab_7894	-	map01100;map00053	Metabolic pathways;Ascorbate and aldarate metabolism	C00818	HMDB0000663;LMFA01170108	neg	-	-	Metabolism;Metabolism	Global and overview maps;Carbohydrate metabolism	Organic oxygen compounds	Organooxygen compounds	479.091	2M+Hac-H	C6H10O8	2.7284	0.049222	0	42.2	4.46686	87-73-0	Carbohydrates and carbohydrate conjugates	4.4102	3.9752	4.2561	5.1893	5.299	5.391	4.11	4.2018	3.924	5.0764	5.2215	5.2447	4.6866	4.6497	4.6505
neg_916	Gentisein	metab_7904	-	-	-	C10065	HMDB0029463	neg	-	-	-	-	Organoheterocyclic compounds	Benzopyrans	289.035	M+FA-H	C13H8O5	2.7925	0.029821	0	54.4	-0.619497	529-49-7	1-benzopyrans	3.7177	3.574	3.5032	5.1665	5.1222	5.3181	3.9918	3.7876	3.8126	4.7161	4.5352	4.6404	4.349	4.3512	4.3723
neg_952	Trans-Chlorogenic acid	metab_7944	-	map00940;map00941;map01110;map00945	Phenylpropanoid biosynthesis;Flavonoid biosynthesis;Biosynthesis of secondary metabolites;Stilbenoid, diarylheptanoid and gingerol biosynthesis	C00852	HMDB0003164;HMDB0032849	neg	-	-	Metabolism;Metabolism;Metabolism;Metabolism	Biosynthesis of other secondary metabolites;Biosynthesis of other secondary metabolites;Global and overview maps;Biosynthesis of other secondary metabolites	Organic oxygen compounds	Organooxygen compounds	353.088	M-H	C16H18O9	2.8317	0.0302114	0	38.6	-0.348362	202650-88-2	Alcohols and polyols	5.3316	5.4163	5.3549	4.9773	5.0404	5.0011	4.9615	5.0718	5.2645	4.0477	4.5091	3.9166	5.1305	5.1325	5.154
neg_984	(6R)-Folinic acid	metab_7979	-	map01100;map00670	Metabolic pathways;One carbon pool by folate	C03479	HMDB0247218	neg	-	-	Metabolism;Metabolism	Global and overview maps;Metabolism of cofactors and vitamins	Organoheterocyclic compounds	Pteridines and derivatives	472.159	M-H	C20H23N7O7	2.9541	0.0119527	0	50.2	0.10565	-	Pterins and derivatives	5.5335	5.5209	5.3831	6.0415	5.981	6.0752	5.6346	5.6761	5.6179	6.3307	6.3008	6.3471	5.898	5.9079	5.9003
neg_992	Theogallin	metab_7988	-	-	-	C10834	HMDB0039287	neg	-	-	-	-	Organic oxygen compounds	Organooxygen compounds	343.067	M-H	C14H16O10	2.9833	0.0247525	0	50	-0.329403	17365-11-6;53584-43-3	Alcohols and polyols	5.5358	5.3335	5.3439	4.8248	4.7934	4.9828	5.4352	5.5433	5.0804	4.7048	4.9949	4.5995	5.2161	5.1987	5.2185
neg_4075	Caffeic Acid	metab_7998	-	map01100;map00940;map01110	Metabolic pathways;Phenylpropanoid biosynthesis;Biosynthesis of secondary metabolites	C01197	HMDB0003501;HMDB0001964	neg	-	-	Metabolism;Metabolism;Metabolism	Global and overview maps;Biosynthesis of other secondary metabolites;Global and overview maps	Phenylpropanoids and polyketides	Cinnamic acids and derivatives	179.034	M-H	C9H8O4	4.0732	0.0142999	59.6	0	-4.29232	501-16-6;331-39-5;4361-87-9	Hydroxycinnamic acids and derivatives	4.3809	4.4893	4.2621	4.9105	4.853	4.8499	5.2543	5.2071	5.1786	5.5316	5.6536	5.7578	5.0895	5.1003	5.1003
neg_799	Dehydroascorbic acid	metab_8001	-	map01100;map00480;map00053	Metabolic pathways;Glutathione metabolism;Ascorbate and aldarate metabolism	C05422	HMDB0001264;PW_C000977	neg	-	-	Metabolism;Metabolism;Metabolism	Global and overview maps;Metabolism of other amino acids;Carbohydrate metabolism	Organoheterocyclic compounds	Lactones	154.998	M-H2O-H	C6H6O6	1.1544	0.00812846	0	39.1	-4.96979	490-83-5	Gamma butyrolactones	5.2815	5.2334	5.3884	5.6265	5.8754	5.8435	3.938	3.9413	2.842	5.0092	5.1198	5.0654	5.2702	5.2723	5.2771
neg_794	Malic Acid	metab_8009	-	map01100;map00630;map01110;map01200;map00620;map00710;map00020	Metabolic pathways;Glyoxylate and dicarboxylate metabolism;Biosynthesis of secondary metabolites;Carbon metabolism;Pyruvate metabolism;Carbon fixation in photosynthetic organisms;Citrate cycle (TCA cycle)	C00149	HMDB0000156;PW_C000592;MJDBOTE0000694	neg	Organic acids	Carboxylic acids	Metabolism;Metabolism;Metabolism;Metabolism;Metabolism;Metabolism;Metabolism	Global and overview maps;Carbohydrate metabolism;Global and overview maps;Global and overview maps;Carbohydrate metabolism;Energy metabolism;Carbohydrate metabolism	Organic acids and derivatives	Hydroxy acids and derivatives	133.013	M-H	C4H6O5	1.1309	0.015287	96.7	0	-7.17294	97-67-6;617-48-1;6915-15-7	Beta hydroxy acids and derivatives	6.5506	6.4565	6.8848	7.0323	7.2508	7.2144	6.1432	6.0812	6.0075	6.9488	6.8539	7.043	6.7365	6.748	6.7482
neg_139	Malonic Acid	metab_8010	-	map00240;map01100;map01212;map00061;map00410	Pyrimidine metabolism;Metabolic pathways;Fatty acid metabolism;Fatty acid biosynthesis;beta-Alanine metabolism	C00383	LMFA01170041;PW_C000543;HMDB0000691	neg	Organic acids	Carboxylic acids	Metabolism;Metabolism;Metabolism;Metabolism;Metabolism	Nucleotide metabolism;Global and overview maps;Global and overview maps;Lipid metabolism;Metabolism of other amino acids	Organic acids and derivatives	Carboxylic acids and derivatives	103.003	M-H, M+FA-H	C3H4O4	1.1309	0.0104129	65.8	0	-9.78281	141-82-2	Dicarboxylic acids and derivatives	4.9656	4.855	5.0463	5.4583	5.5335	5.5778	4.5833	4.5748	4.3236	5.4874	5.5341	5.5166	5.1387	5.1409	5.1474
neg_4669	Mesaconic Acid	metab_8012	-	map01100;map00630;map00660;map01200	Metabolic pathways;Glyoxylate and dicarboxylate metabolism;C5-Branched dibasic acid metabolism;Carbon metabolism	C01732	HMDB0000749;HMDB0000634;LMFA01170116	neg	-	-	Metabolism;Metabolism;Metabolism;Metabolism	Global and overview maps;Carbohydrate metabolism;Carbohydrate metabolism;Global and overview maps	Lipids and lipid-like molecules	Fatty Acyls	129.018	M-H	C5H6O4	1.5533	0.00907847	62.7	0	-7.37094	498-23-7;498-24-8	Fatty acids and conjugates	5.8893	6.0376	6.2018	6.5472	6.507	6.4902	5.862	5.7998	5.7879	6.3777	6.4153	6.5028	6.1667	6.1688	6.1744
neg_442	Pyrocatechol	metab_8014	-	map01100	Metabolic pathways	C00090	PW_C000764;HMDB0000957;MJDBOTE0000665	neg	-	-	Metabolism	Global and overview maps	Benzenoids	Phenols	109.028	M-H, M+FA-H	C6H6O2	3.1398	0.00923315	79.4	0	-9.26064	120-80-9	Benzenediols	5.8602	5.8541	5.8741	6.5689	6.6678	6.7019	5.7421	5.8856	5.6109	6.7217	6.825	6.7611	6.317	6.3192	6.3248
