# Supplementary figures and images for: Comparison of Metabolites and Main Nutritional Components between Uncooked and Cooked Purple Rice
Source: MDPI journal article supplement (doi:10.3390/metabo13091018), 2023-09-15

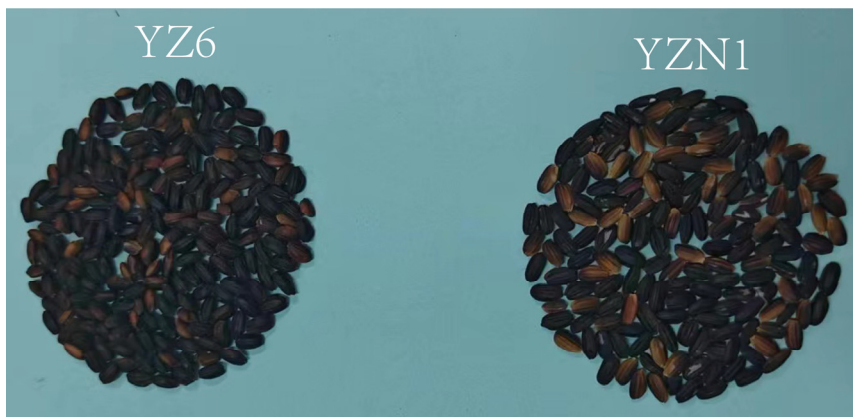

**Figure S1.** Two purple rice pictures.

Supplement: s1 [file s1]
